# Supplementary material
Source: publisher figshare collection journal article supplement (https://gsajournals.figshare.com/ndownloader/files/26881133)
Supplement: Supplementary file 1 [file 26881133]

>rnd-1_family-227#LINE/RTE-BovB ( RepeatScout Family Size = 424, Final Multiple Alignment Size = 100, Localized to 1000 out of 1011 contigs )
ATGTAAACCAGATCGACCATTTCATGGTAAACAGAAAATGGCGTGGGTCC
CTACTCGATGTGCGTGTCAAAAGGGGAGCAGATGTGGGAAGCGATCATCA
CCTTGTAGTCGCTCTACTACGACTTAAACTCAAAAAAGTTTACACGCAAG
TTAAGACACAGACAGCACGTTACAATGTTAACCTTTTAAGAGAAAAAGAC
ATTGCCACTAAATTTATAGTAGAACTCAAGAATAGATTTCAAACCCTATC
AAGTGACCCAGAAACTCCAACTACAATCAGCATTCAAGACAGATGGAACC
AGATCAAAGAAACATACAAATCAACTAGCAATAACATATTAGGAACCAGG
AAACAACACCACAAAGAATGGATAAGTAGTCAAACCATGGACTATATTGC
CAAGCGAAAAAGAATAAAGAGCCTCATAAATCACACTAAATCAGAACGTC
AGAAAGACAAACTAATGTTAGAATATAGCGAACTAAATAAAATGACCAAG
AAAAGTGCCAGAGCTGACAAGAGAAGATTTATGGAAAATCTTGCAGAAAC
AGCAGAAAATGCTGCTAAAGCACATGATCTACAAACCCTACACAAAATTA
CCCAGCAAATTTGCGGAAACAGAAACAATTATCACAGCATACCCATCAGA
GATAACCAAGGCAGACTGCTCACCACAGAACAAAAACAAGACATGCAGTG
GACTAAACACTTCTCCGACCTCTTGAACAGACCTGATCCTGAAAATCCCC
CAGATATTCAACCAGCCTCTCAGGACATTGACATTATTACTGAACCACCA
AGCAAACAAGAAATCCTTAAAGCTATCCACACTTTAAAGAACAACAAAGC
ACCAGGCAAAGACGAACTGCCAGCAGAACTTCTCAAAGTAGATCCCAACA
CAACTGCTAGCATTCTAGAACCATTGTTCAAGGATATTTGGGAAAAAGAA
GTGTTGCCTGATGACTGGACTGAAGGAACAATAGTCAAAATCCCCAAAAA
AGGAGACTTAACAGACTGCAATAATTGGAGGGGAATTACTCTACTCTCAG
TACCAAGCAAAATATTTTGTAAAATCATCATAATGCGGCTTGAAAAAGGA
GTAGATAAATGCCTACGAGTGGAACAAGCAGGATTCAGAAAGGGCAGAGG
AACAACTGAGCACATCTTCGCCATACGTAACATTTTAGAACAATGCAACG
AATGGCAGAGAAGTATATATATTAATTTTGTGGACTTTGAGAAAGCTTTT
GACAGCGTCCATAGAGACGGTCTGTGGAAAATTTTACGACATTATGGAAT
TCCAGAAAAAATAGTCAACATAATTGCTCTCTTCTATAAAGACTTTTCCT
GCAGTATAAAAAATTACAATACATCTTTCCCAGTAAAGACGGGTGTAAGA
CAGGGATGTGTTATGTCATCTCTCCTCTTCAACCTTGTGATTGATTGGAT
ACTAAAGAACACAGTAGACAGGACATTGAGAGGCATACGATGGACTCCAT
TCACCATGCTTGAGGACCTTGATTTTGCAGATGATATAGCACTCCTATCA
CATAAACATGAACATATACAAGAGAAAAGTAACAGACTACACNGCACAGC
AGAAATGGTGGGACTGAGAATAAATACAAAGAAAACTAAGATCATGACAA
ACAGTCCAAACCAACAACCAGTGACCATAAGTAACCAANCACTTGAAAAT
GTAGAACATTTCACATATCTTGGCAGTGTGGTGTCCCTACTGGGAGGGAC
AGAGGAAGACATACAGTCACGTCTGAACAAAGCTAGAGCTGCTTTTGGAA
GGATGAGGCAAATCTGGAAATCCAACAATTACTGCAGAGGAACGAAACTC
CGACTCTACAAGAGCATCATTTTGCCAGTTCTTCTTTATGGAGCGGAATG
CTGGAGAATGACCAAAAAGGATGCACACAAGCTGTCCACCTTCCACCACA
CATGTCTACGTAGAATTATCAAAATTTTCTGGCCAGATACAATCTCAAAC
ACTAAACTACTTCAAGTCACAAACCAAGAAACTTTAGACAGTATGATNAC
CAAGAGAAGATGGAAATGGCTTGGCCACGTTATGAGAATGAATCCTGATA
TACCTGCCAAAACAGCTCTCACATGGACACCAGAGGGAAAGAGAAAACAG
GGGCGCCCAAAAACAACATGGAGACGAACGATGGAAAGTGACCTGAGTGC
GGCATCTTTGACATGGAAAACTGCACTGAAGATTGCACAGGACAGGAAAG
CATGGAAAGTCCTCTCTGAAGCCTCATGTGCCACTAGGCATAACGAGAAC
TGATGATGATG
>rnd-1_family-92#LINE/RTE-BovB ( RepeatScout Family Size = 1258, Final Multiple Alignment Size = 100, Localized to 1000 out of 1011 contigs )
GTTAGTAGAACCCCTGCCCCACTACACATACAGCTGAATGGTTCTGCTCT
GAATCAAGTTAGGGAGTTTAAATATCTAGGAAGTATGATCACAGAAGATG
GTAGAATTGACAGAGAAATAGAAACCAGATGTCAGAAAGCAAGTGCACTT
ATATACCAATTGTCACCATTATTAAGACATCCAAGCATAACTATGAGTGC
AAAGAGACAGATTATNAACAGCATATTCATTCCAACATTAAGCTACCAGT
GCCAAACATGGACACTATCTAAAGCCCATATACGCAAAATCACCACCTGC
GAGATGAGGTGCCTGAGAAAAGCAGCCAACCTAACCATCCGAGATCGAGT
GAATAATGANACTATCAGGCAAATTGTGGGAACGACACCTTGTACTAGAT
TCATCGAGAAACAGCAGATCAAGTGGTTTGGCCATCTCGTTAGAATGCAG
CAAGATCAAATACCATCACAAGCACTACATCTCAGAAGATCAGCTACAAG
AGCAAGAGGACGGCCGCGGAAAACATGGATCGACAACATTAAAGACACTC
TACGCCTTCACGGCATGACAATAGCCAGTGGCAGCCAACGTGCACTGGAT
CGCAAATTATTCCTCCCCACGACGCTTAACGGCAGAAGTGGTTTATGATG
ATGATGATGA
>rnd-1_family-374#Unknown ( RepeatScout Family Size = 167, Final Multiple Alignment Size = 100, Localized to 1000 out of 1011 contigs )
CCTAGTTCTTTAACCACATTGTAGAGCGAAGTGGAGACGAGACCTCTCGC
GCCCACCTCGACGGCGAAGACTCTTACTGTGTACGCCTCGTCTCTCCTCA
GACCGGCCGCTAAGTCACCGTACTTCTCGAGCTTGTAC
>rnd-1_family-300#Unknown ( RepeatScout Family Size = 264, Final Multiple Alignment Size = 100, Localized to 1000 out of 1011 contigs )
CACCTAAACTGAACAGTCCGTGGCGACAGCATGCGGCGCCAACTCCTCTG
GCTACAACGACCTGTACAGACAGTAGTGACATTGTTTTAGTTGTTGTTGT
TGTGACGGTGGTGGTGGTAGTGGTAGCAGTAGTACTGGTACTCGATGGGT
GATGTGGTAGCTGTTACACTGGCCACATTTACTTCTCANTACAGATTNNT
GCTACCCATTTTAGTCCGGGTGGACACGGATGCCAAGCTCAGTTTAACAA
CAATATTTCGTCAGGCGATGACTTTCCCATCCTTCGGAGAGGATGATATG
ATT
>rnd-1_family-341#Unknown ( RepeatScout Family Size = 201, Final Multiple Alignment Size = 100, Localized to 1000 out of 1011 contigs )
AAAACAGACACCGATTCAAAGCAAACAATCAGCATGCTTACAGTTAACTG
AGTAACGGGAACTTTTCAAAACATCAAATTGCACGCGTTTCATAGGCGTT
TCACTCTCAGGTGGTCATCTCCAGCATTAGCCTCCCGTGAGTTGCGGATT
TTTCATTGTATGCGGGATAGGCTATCAAAATAATCACCACGCATCGCTGC
ACATGTGAACTGATTT
>rnd-1_family-183#Unknown ( RepeatScout Family Size = 561, Final Multiple Alignment Size = 100, Localized to 1000 out of 1011 contigs )
CGCGCGGCGTGGATTGGGGCTAAACTAGATGGCTGGGACTCACGAGCAAA
TAAAATGAAGGAAGCTGCAGGAGATGCGGTAGCTGCTGCTCGTGAGTCCC
AGCCATCTAGTTTAGCCCCAATCCACGCCGCGCGTAGCGGCGTGGGGGAT
ACTCTCGGCGGTGGCGGNAGTCGCCGGAA
>rnd-1_family-430#Unknown ( RepeatScout Family Size = 121, Final Multiple Alignment Size = 100, Localized to 1000 out of 1011 contigs )
TTGTCGTTTGTGTTTGTGATANTGTGAAGCTGACTGGTTCTACTTTTCGT
TTGGTTTGATATCTTTTCATG
>rnd-1_family-21#Unknown ( RepeatScout Family Size = 3842, Final Multiple Alignment Size = 100, Localized to 1000 out of 1011 contigs )
GGGCTCATGGTCAAGACCTATCTACACCTCTCCGCGGTCATCCTAGAAAC
AGGTTCCCAACCGGGGGCCTGGCCAACGTAGATAGGATCGACGTTTCCTT
CGAAGTCGGAGTGCATCTGCCTGAGAGGCGAGGAACCAACAGTCTGCACA
CAAATAAGCCAGATCTGTAAA
>rnd-1_family-76#Unknown ( RepeatScout Family Size = 1535, Final Multiple Alignment Size = 100, Localized to 1000 out of 1011 contigs )
GAGGTCCCAGAAACCGCGTTCAGCCATTAGACCATATTTATGGCCGGGCT
ATATTGCGGCCCCTGGCAAGAGCCAGGGTAGGGCTTCAAATAACGAAAAA
TTGCATCTCACAAGGAGATGACTG
>rnd-1_family-202#LINE/I ( RepeatScout Family Size = 504, Final Multiple Alignment Size = 100, Localized to 1000 out of 1011 contigs )
TGATAAGACTCAGATCAGGAGCATATCGTGGATTTTCTGTCCAGGATATT
CGGGTGTGCGGGGTAACGAGCAGGCTGATAGATTGGCTGCTGCTGCCGCT
CCTCTGGGCGGTGAGCTACTTTA
>rnd-1_family-361#LINE/RTE-BovB ( RepeatScout Family Size = 177, Final Multiple Alignment Size = 100, Localized to 1000 out of 1011 contigs )
TAACATAACATAACCCTTGACCCGTTAGGGTCGTGGAGGTGTATCGATGG
AAGCACTAGCACATAAAACCCGCCATCTTTCTCTGTCTTCCGCTTGATGA
ATAAGTGTATGATAACTTAGTCCTGTCCATTTCTTGATGTTGTCATTCCA
GGTTCTTCTTTGCCCTCCTCTTCTTCGACTACCCC
>rnd-1_family-224#Unknown ( RepeatScout Family Size = 441, Final Multiple Alignment Size = 100, Localized to 1000 out of 1011 contigs )
TTGTTGTCAGCGGCCGGCGATATCGCGTGTTCTATATTNCACGATGTGAG
CGCTTTTAACGACCCCAAAACATNTAGAACTGGCCCTAACCCCAAC
>rnd-1_family-147#LINE/I ( RepeatScout Family Size = 797, Final Multiple Alignment Size = 100, Localized to 1000 out of 1011 contigs )
TTCATTACCCACCACGCCGGCATGGCCTGGAGAAAAGATCCAAAGTATGC
TCACTACCCGTGACCTTTCCAGTGAAGCTTGCCACTCTGCTCGAAGCATC
CCTGTCTTCACCTTTCTCAG
>rnd-1_family-13#Unknown ( RepeatScout Family Size = 4534, Final Multiple Alignment Size = 100, Localized to 1000 out of 1011 contigs )
CTTCCTTCGAAGTCGGAGTGCATCTGCCCGAGCGGCAAGGAACAACCAAC
TGCACACAAATAAGCCAGTAAAACGGATGTACACGCAAAACTCAGGCCCT
GGCACAAAGCCAAAGTCCAAATGGACGAACAACCAGGACTTTCCGCCGGA
GCTTACAGCCGGTGAACAAAGAAGAAGAA
>rnd-1_family-272#LINE/RTE-BovB ( RepeatScout Family Size = 323, Final Multiple Alignment Size = 100, Localized to 1000 out of 1011 contigs )
AAGAAATGATGGACATAATTGTAACGGAAAGTGAAAACAAGGGTCTTAGT
TTGAACAGCGGAAAAACAGAAGTAATGGTAATTACAAAGAAAACTGACCC
TCCAAAATGCAACATCAAAGTAAATGGGACAAACCTCAAGCAAGTTGATA
CGTTTAAGTACTTGGGTACCCTGATAACATCAGATGGAAGATGTATTA
>rnd-1_family-351#Unknown ( RepeatScout Family Size = 191, Final Multiple Alignment Size = 100, Localized to 1000 out of 1011 contigs )
CTATAGTCCGTTCCAGAAGTCGTGCCCAACTTTAAAAATCTGTAACTCAG
TAACCGTTCGGTGTAAGTTGTTGAAATTTGGCATGCAACCTGTTAATAAT
CATGTCCTGTAAG
>rnd-1_family-36#Unknown ( RepeatScout Family Size = 2617, Final Multiple Alignment Size = 100, Localized to 1000 out of 1011 contigs )
GGGATCTGGCCGACGCTCAACACTCAGGGAAAGGCGAGACGGATATACAA
TCAGACGGTTACTGGTACCATCGGAATTGGAACTCTTCGCTTGCTGCTGA
AGATGGGGACGGAGCGCTTATGGGAGTGTCCCGAGTGCTGTGATGTCGAT
TCTTAATTCAACATTCAA
>rnd-1_family-68#Unknown ( RepeatScout Family Size = 1702, Final Multiple Alignment Size = 100, Localized to 1000 out of 1011 contigs )
TGATTGTATATCCGTCTCGCCCTTCCCCTGAGTGTTGAGCGTCGGCCAGA
TCCCCTGGTAACTCCTCGCAGCGCCATTCTCCTCAGACCGTAATGATCTA
TCTGCGCCTC
>rnd-1_family-52#LINE/RTE-BovB ( RepeatScout Family Size = 2156, Final Multiple Alignment Size = 100, Localized to 1000 out of 1011 contigs )
TCCAGCGCATTTAGTGCATTTAATTGAAAATCTTTATCATGAACAACAAG
CAGCCATCAGAGCAGCTGGTGAAACATCTGATTGGTTCGAGGTGCAAAAG
GGGGTGAGGCAGGGGTGCATTCTCTCACCATACCTATTCAATATATACGC
AGAAAATATAATGAGAAATGTCAAAAATGACCAGACTTGTGACAGTTATG
ATCCGCTCAAAATTGGTGGCAACCCTATTCCGGAACTCCGCTACGCAGAT
GACACAGTCCTCCTTTCGAACAGCGTAAAGGGAATAGAAAATTTAATATT
GTCTGTCCAAAAGCACAGTGAAGATCAAAATCTGTTCTTGAATTTAAAGA
AAACGAAAATAATGTCCACAGATAAAACTGGCTGTCACCCAAAAATAACA
ATAAATGATGAAGAAATTGAAAATGTCACAAACTTTGAATATCTAGGCTC
TATAATAAACAGCAATGGAGACTGTTCGACAGAAATTAAAAGGAGGATGG
CCATAGCAATGCAAAGATTGAACAGCCTTAAAAGTCTATGGTTAAGCACC
AGCAAGGAGATAAAAATTAGAATTTTGAGAGCATGCATCTTCCCTGTGGC
TACATACGGATGTGAGTCGTGGACTATCTCTCAGTCCTTAAGAAAGAGAA
TAGGGGCTTTTGAGCTGAAATGCTATAGAAAGATTCTCAGAATATCTTGG
ACAAAGAAGANGAGAAATACTGACATCTTAAAAGATCTGAACATCAAGGA
AGATTGGCTAATAAACAGCATCCTNTCTCGGAAGCTGAAATATTTTGGTC
ATATCAAGCGCCACGACGGATTGGAAAAAAATTATAGCAGAAGGCATGGT
ACCAGGAAGGAGGGGCAGGGGCCGACCGACACGAAGATGGGCACAGGATA
TAAGTGACTCCTTGAGTGTGAAAGTGCATGAGGCGGGAGAACTGGCGAGA
GACCGAGTTTCTTTCAGGCAGACCGTGATGAGAGCGACGTTCTGCAAAGG
ACCTGCTACATGATGATGA
>rnd-1_family-54#Unknown ( RepeatScout Family Size = 2118, Final Multiple Alignment Size = 100, Localized to 1000 out of 1011 contigs )
TTTACGTCCAGTAGTTTGCCATTGCTTTCTGGACGGTCGGCTTTCTTGAT
ACCACTGTCGAAACCAACGCAAGGCGCATCGCCCGCAGCTGGGATCGAAC

>rnd-1_family-115#LINE/RTE-BovB ( RepeatScout Family Size = 1022, Final Multiple Alignment Size = 100, Localized to 1000 out of 1011 contigs )
ATCGACATAAAGATTCTAGATCACAGCCTAAAACAAGTGCAAGAATTTAA
ATACTTGGGAAGTATCTTTACATCCAATGGTAAAATAGACAGAGAGATCG
AAGCAAGAATCCAACAAGCCAACAATGTCGCATACCAGCTTGCCCCAATT
TTAAAACACCCTGCTGTCCCAGCTGAGATAAAAAGACAAATTATAAATAC
AATCTTTATACCGACATTAGGTTATCAATGTCAGACTTGGACATTAACAA
AAGAACACGAGAGAAGACTAACCACCTGTGAAATGAGATGTTTGAGAATG
GCTGCGAATAAAACCAGAAGAGATCGAGTGAGAAACGACGTGATTACAAG
AACTATTGGAACCATACCCATCGTTAAATTTATTGAGAAGCAAAGAATGA
AATGGTTTGGTCACCTAATGAGAATGGAACCAACGATGCCAGCATCAAGA
GCATACAACATGAAAATCGAAACACCAAGAGGCAGGGGAAGACCAAGAAG
AAGATGGATTGAAGGAGTCACGGACAACTTGAGACTTCATAACATCACGG
CATATGAAGCGACTGAGCGCGCCCTGGCTCGGTTGCCGATCATCTGATAG
ACTGCGACGCCTAGCGGCACAAGCAGATTTTGACAAAAGAAGAAGAA
>rnd-1_family-107#LINE/RTE-BovB ( RepeatScout Family Size = 1087, Final Multiple Alignment Size = 100, Localized to 1000 out of 1011 contigs )
CGCTTTCATGGATTAACTAAGCTGTCAGTGACAATTTACAAGTTTAGTTA
CTTGTTATAAAACTAAGAATACTTTCATTCCTAGGTATTAGTTACCACAG
ACTGACTGACTGAAGGATGCAAAACATGAAATGTTTTTAAATGTTTACTA
TTCTGTACTACATTTTGTGAAGTAAAATTTCAGCGTACATTTGACATTAT
GGATGTTTTTTTTTTTTTTTTTTAGATCTATTTTATACACTGTTAGAAAG
TGGAAGAATGGGCCTCAGTTTGAATAATGGGAAGACAGAAGTAATGGTGG
TATCAAAGAAACGAATTATTCCTAAATGTGTAATAAAAGTCGATGGTGTT
ATTTTGGGACAAGTACAGAAATTTAAGTATCTGGGCACATGGATAACATC
AGATGGAAGATGCATNACTGAAATAAGAAACAGAATAGGACAGGCAAAAA
CTGCATTTTATAAAATGAAGAACATCTTGTGCAATATATCCTTGTCATTG
AGAGTTAGAAAAAGAATTCTTGCTTGCTACATACATCCAGTTTTAACATA
TGGCTGTGAGTCCTGGACAATCGGTAGGCAGGCCAAACAATTTCTTGAGG
CCTCAGAGATGTGGTTTTACAGAAGAATGCTTAGAATACCTTGGACAGC
>rnd-1_family-105#Unknown ( RepeatScout Family Size = 1125, Final Multiple Alignment Size = 100, Localized to 1000 out of 1011 contigs )
GTNCTTTATTAATATCCTACCCCAGATGACGTCACAGGACAGTCCAACAT
TTTAGAGGGTGGTAAGACTGGGTTTCCCGGCTTTCTGATGCTTTTAACGA
CCCCAAAACATCTAGAACTGGCCCTAACCCCAACCCACCTACGTCCCACG
AGAGAGTGCAGCCTAGGTCCCACGACTGCATGCAGCCTAGGTCCCACGAC
TGCATGCAGCCTATCTACCACCCCCTGAAATATTAGACTGTCCCGTGACC
TGTGGATTTCCCCTGTTTGGGGTAGGATATTAATAAAGCACC
>rnd-1_family-7#SINE/tRNA ( RepeatScout Family Size = 5616, Final Multiple Alignment Size = 100, Localized to 1000 out of 1011 contigs )
GGAGTCGCCGTGGCGGAGCGGCTAGACGCTCGCCGCGGATCGGAAGGTCG
TGGGTTCGCTCCCTGGCGGAGCCGGACTTTTTTCAAAAATGACCTTGGCT
CCCAGGTCGACCCAGCCTTGAGTGGGTACCGGGTGCAGTCCCGGGAAGTA
AAGGCGGCCGGCGTGATGCTGACCACATCACCCATCTTGTGCCGATTGGT
CTATAAAAATATAGGTCTAGCCCTATATGCCCTATACGCCTAAAGGCGTG
GAAAAGGGTCCTTTACTTTTTTTT
>rnd-1_family-4#SINE/tRNA ( RepeatScout Family Size = 6192, Final Multiple Alignment Size = 100, Localized to 1000 out of 1011 contigs )
GCCGCCGTGGTGTAGCGGCTAGACGCTCGCCTGCGGATCGGAAGGTCGTG
GGTTCGGGTCCTGACGGAGCCGGACTTTTTTCAAAAATGACCTTGGCTCC
CAGGTCGACCCAGCCTTGAGTGGGTACCAGGTGNAGTCCTGGGAAGTAAA
GGCGGCCGGCGTGATGCTGACCACATCACCCACCAAGTGCCGATTGGTCT
ATAAAA
>rnd-1_family-394#LINE/RTE-BovB ( RepeatScout Family Size = 147, Final Multiple Alignment Size = 100, Localized to 1000 out of 1011 contigs )
GTATACCAGCGCCAGGCTAGAAAGTTAAACCACTTTCACACAGTCTGCCT
NAGAAAGCTACTGAANATCAGATGGCAAGACAAGGTCCCNGATACCGTGG
TCCTTGANAGGGCAGNCATGCCCAGCATCCACACNATACTGANGCAGTAT
CAGNTTCGTTGGGCTGGTCACGTAGCCCGCATGCCAGACCATCGNCTCCC
AAAAAAGTNTTCTATGGCGAGCTNCAGNAAGGGAAACGNTCCCAGGGNGG
ACAGAAAAAACGCTNTAAGGACACCCTGAAGNCTTCACTCAAAGCNTTTG
GCATNAACGACACCGACTGGGAGGCTGCCGCACAAGACCGNACTGCATGG
CGTACANCTCTACACAAGGGCGCGGCTACATGCGAGGCAAACAGAACAGC
AAGACTGATTAAGAAAAGGATGGACAGAAAGGCGACTGCAGGAGATCCCT
CCCTGGCACAACGCTCATTCCCTGTCCNCACTGCCCAAGAACTTTCCGGG
CCCGCATCGGNCTNATCAGCCACCTTCGTACTCATACTTGATGAAAAAGA
GTGGTCNTCATCATCTTGATGGACAACACA
>rnd-1_family-64#LINE/RTE-BovB ( RepeatScout Family Size = 1822, Final Multiple Alignment Size = 100, Localized to 1000 out of 1011 contigs )
GACTATCTCTCAGTCCTTAAGAAAGAGAATAGGGGCTTTTGAGCTGAAAT
GCTATAGAAAGATTCTCAGAATATCTTGGACAAAGAAGATGAGAAATATT
GACATCTTAAAAGATCTGAACATCAAGGAAGATTGGCTAATAAACAGCAT
CCTTTCTCGGAAGCTGAAATATTTTGGTCATATCAAGCGCCACGACGGAT
TGGAAAAAAATTATAGCAGAAGGCATGGTACCAGGAAGGAGGGGCAGGGG
CCGACCGACACGAAGATGGGCACAGGATATAAGTGACTCCTTGAGTGTGA
AAGTNCATGAGGCGGGAGAACTGGCGAGAGACCGAGTTTCTTTCAGGCAG
ACTGTGATGAGAGCGACGTTCTGCAAAGGACCTGCTACATGATGATGATG
AT
>rnd-1_family-49#Unknown ( RepeatScout Family Size = 2357, Final Multiple Alignment Size = 100, Localized to 1000 out of 1011 contigs )
CAGGATGCTGAATATCAGCCAATTCCTTTGATCTTTTCGAACCATTGTAA
ATAAGTGGAGTGAACTTTTAGATTTTACAGTAAAAATCTGAATTTCCGGT
TCTATTTTTTGTTCAGAGGCGTGTCTTCATAATACATTGATAGGTGAAGT
AAATTTATTTGTTGTCATTTATGTTCAACTGAGTTGAGTTGAGTTGAGTC
AAGAATTGACATCACAGCACTCGGGGCATTCCCATGCGCGCTCCGTCCCC
ATCTTCAGCAGCCAGCGCAGAGTTCCAATACTGATGGTACCGGA
>rnd-1_family-71#LINE/RTE-BovB ( RepeatScout Family Size = 1622, Final Multiple Alignment Size = 100, Localized to 1000 out of 1011 contigs )
AAGTAATGGTTATATCAAAGAAGAAGATAACTCCACGTTGTGATATCTCA
ATTGAAGGAAAAAGACTTAACCAAGTCAATAAATTCAAATATCTGGGAAC
AATCATATCATCAGATGGAAAATGTGTGACAGAGATTAAAAGCAGAATAG
GTCAAGCGAAGGCTGCATTTCAGAAAATGAAAAATATCTTATGCAATAAA
TCGCTCTCATTTAATGTCAGAAAGAGGGTGCTAAAATGTTACATAGAACC
TGTTCTGCTGTATGGCAGCGAATCTTGGAATGTCAGTGAACAAATTAAGA
AGAATTTGGAAGCAACAGAGATGTGGTTTCTGAGACGAATGTTACGAATA
CCTTGGACGGCCAGAGTAACTAACAACGATTGCTTGAAAGAAGCTAATGA
AAGTAGATCTCTATATACAACAATAAGAAAGAGACAAACACTGTTCTTTG
GCCACGTAATGAGAAGAGAGACATTGGAGAACATCGTGACAACTGGAAAG
ATCAGTGGAAAAAGGGGTAGAGGCAGACCAAGAGAGATGATGCTGGATGG
GCTGAAACGATGGCATGGAGGGATATCATCAAGAGAGCTGTTCCAGGCAA
CCAGGGATCGTGATCTGTGGAGACGCATGAGCGCCTACGCCAGTTGGCAG
GGCACATGATGATGATGA
>rnd-1_family-214#LINE/RTE-BovB ( RepeatScout Family Size = 475, Final Multiple Alignment Size = 100, Localized to 1000 out of 1011 contigs )
CACACGTTGAGAAAACCTGAGAACAGTATAACTAGAATGTCTTTGCACTG
GAACCCACAGGGGCATAGGAATAAAG
>rnd-1_family-344#Unknown ( RepeatScout Family Size = 196, Final Multiple Alignment Size = 100, Localized to 1000 out of 1011 contigs )
TGTCACATATCGCTCCTGTCGCGTGCCTGATTTAAGGATTTCTCCTTAAG
AACCAACAGCACTCNGAAATAATTATGTTGAGTCGTTTGGCTCGTATTGG
TCTAAGGGATNCCCCGTGGCCAATATACGCTCAACTTATTTCNGGAGTAG
GGCAACTCAAGTTTTGGCACTACAAAATATATCTGTATATAATACAATAT
TCCTAGGCACACTTGGCTGGACACCCCCACTACTATAATAAAGANAGCCC
CCAGGTTATGATAGTNCACTATCATAACCATGTTAACACANATAACGCTT
ANTANTCACACANACACAAANGCTAGACACTTAGAANGGTGAAATAGGGA
CACCCAAGTCAGCCATGAAAATGAATGCATGTAATNAGTACAACATATAC
ATATATATAATAGTGAAGTAGATGCCAGATCTCAGTGGATGGATCTCAGA
ATACAATGNCCAGATACCCAAAGACTGAACAGCCAGAAGGTCCTGGAGGT
GACACGTGTTCATCATCGGAATCCANNGGAGCTGTGGGGAATANAGCATG
TCATAGAGGCAAACTAGCACTTATCCTCTTTCTATCGTCGATGCTCCCCT
CAGCTCCTGGTGATTCGACTGTCTTTGACTCTGGTAATTCTGCTTCGACT
GGATCAGGTGGTGAAGGAGTACCTCACCATAGAGGACACAGNAACTGCAC
NGGNACCCAGCAAGTCTCTT
>rnd-1_family-34#Unknown ( RepeatScout Family Size = 2768, Final Multiple Alignment Size = 100, Localized to 1000 out of 1011 contigs )
TGAGTTGAGTCAAGAATTGACATCACAGCACTCGGGGCATTCCCATGCGT
GCTCCGTCCTCATCTTCAGCAGCCAGCGCAGAGTTCCAATACTGATGGTA
CCGGTCACAATCTGGTTATATGTCCGTCTTGCCTTTCCTCTGAGTGTAGT
GAGCCGGCCAGACCCTCTGGTTACACCCAGGTGCCTCATTCTCTCCAGGC
CATAATAATCTTCTTTCTCTACTGATTCCGTTGCTTGTTCCCA
>rnd-1_family-375#RC/Helitron ( RepeatScout Family Size = 167, Final Multiple Alignment Size = 100, Localized to 1000 out of 1011 contigs )
TATCTATATATATAAAAATCAATGTTTGTGTGTTTGTTTGNCCCCTATAG
ACTCGGAAACTACTGAACCGATTTAGCTGAAATTTTCAGGATATGTTTGT
TTTGATACCGGATTTTGAACCGTCGTGGTTTGAAATTCAACCTGTCACTG
TTAGAGATAGGTGACCACAATTTATGCCAAAATATTCGAAACTAATATTT
ATAACTTTAGTGATTTCTAATTATAGCCACGTTAGTAATTGCGCATGCGC
CGTAGTCAGAACGCAAGCTTCCGCCATTCGCCGGCGAGTTACGTGCAGCC
AACGCCTTCTCTAATAACATAGAGTAGGTCGTGGTACAGCAAACAAGACT
ATCTCTATATCTGTGCAGGCATGATTGCCACAATAACCATATTAAACACG
ATTTCTATTTTCTGTTTTTTTTTTTCAAACAACCTTCGATGGGGGGGGGG
GGGGGGGG
>rnd-1_family-156#LINE/R2-Hero ( RepeatScout Family Size = 715, Final Multiple Alignment Size = 100, Localized to 1000 out of 1011 contigs )
ATGCGGACTGTTCTAATTACGCTGCCGCGGCGGCTTCTTATCTCACAGTA
CCTCCTTCGAAACCACCAAGTCGTCTTGTCTCTGGCCGAAAGTATAACAC
CATCCGGTAATTCCGTGCGGCGGGGAAGCAGCCCTGAGCTTCATGAACTC
AGGTGGGCCCACCTCCGAATACGTTTAGGAATCGTGGGCCGAAACGTGTG
TCGAAAGAGGATAATTTCTACTGATGACTGGTAGATCCCCGCTGTACTTG
CTCCCTGTGAGTTTATTCCTATTGTACGTGGCTAGCCCACAAGACTACCA
GGAAAGACTGGTGACTATCGGGAAAGACCTTTTGACACCTATGGAAAGAC
TGGCCCCCCGGTATCGCCGGGGGGATAAACTGACATCTGGAGACAGATGT
CGACTGTGGACCGGGTTGATCACCCCTAACACAGTATAATACCTCCGATT
TCGTACAACCACAANGAAATATGCCCCCAGGGCCCTCCGAAAGGGGGGGA
GAATGAAGGGCCCAATCNAATTGATACCCTCGNTGACGACTTTGCTAGCC
CCCGGACTGAGATACTCGCCCAACGTCCGGGCTGGCTCTGTACATGTGGG
AAAAGCTTCACGGGGTTGCATGGTCTGAGAACGCATGCCGGAAGAATGAA
ATGCGAGGGTGCTCCACGCAGTAAACGCCGTCGCAAAACTACCACTCCTG
TGGTAGTTTCTGAGTCGTCAGGGNACGACGGGCAGGGTGAACCCCACTCG
CCCGGAGAGGCCCATGACGTCGACTGCGGAGGAGCACCTTTGATGATTTC
TGAAGAAGTGCGTTCCAAGATCAGGTTTCCACCTGCGAGCGAGAAGGTGG
TGTGGTGTAAGTTGGAGGCTACATTATGTGAGGTACTTAAACAAACTCTA
AACAAGAAGTCGCTAGGCGACAAGCTTACTAAATTTGGTGATGTAATATA
TGAACACTGCTCCCGCGAGTTCGGGACAGTAGTAAAGGCACAGCCGGGTG
CCAAGCAGAATACTAGCAGGAGGCAGAGGGACATTCTGAAGTGTCGGGCA
GACAAGAATGCCCTCAGAAAACGGTTCAAAGCCGCTACGGGCAGCGAACG
GGAGGGGCTGTACGAAGTNTGGNTGCATTTAAAGAACAAACACAGTGCCC
TCTGTCGCGCCGAGCGTTTCTGTAACAACAGACGNAGAACCAAAAGGGAG
CGAGAGAAATTCTTTAGGGACCCGTATCAGTTTGCCCGAGGTCTATTCGA
GCAACCGAAGTCTGGGACTCTGGTTGTCAGTCAGGAAGAACTNGAGCTAC
ATCTACGCAAGATGTACTCTGATAAAAAGAGGAGAGAGCCTCTCGATGAC
AATCCAGAGATCCTTAGCGGNCTCAAACAGCCTTCGGTGCCGAAGGTACC
ATTTAAAATGGTACCTCCCCTTTGGTCTGAGGTTGAGGACGTTGTGAAAA
AAGCCAGCGGCAAGTCTGCCCCAGGTCCGAACGGTGTTCCGTACGTTCTT
TACAAGCGTTGCCCGAAAATCCTAAAAATGCTTCACGTCTTGTTGAGACA
AGCGTGGATCCGCAATCACATATGTCCAGAGTGGTCAAAGGCAAATGGGG
TCTACATTCCCAAAGAGCAGGACTCGAAGAGTCTTTCCCAATTCAGGCCC
ATCTCGCTGTTGAATGTCGAGGGTAAGATATTCTTCTCGGTCATGGCTCG
CCGGCTCACACAGTATCTGATGACTAACAAGTACATAGATACGAGTGTTC
AGAAGGGTGGTATTCCGGGCGTTCCTGGGTGCCTTGAACACGCGACCATG
ATCTGGGAGGCTATCCAGAGAGCCAAGCATGAGAGAACCGATTTGCACGT
TATATGGTTGGACTTAGCCAACGCCTACGGGGCAGTCCCCCATAGGCTAC
TGTGGCGAGCCCTTCGCATGTTTCACGTACCGACACAGATCAGTCAAATG
GTCGAGCAATATTTCTCCAAGTTCGCTTTGCGCTTCTCTACCTCGACGTT
TACCACGAGGTGGACTGAGTTGCAGATTGGGATAGCTATGGGGTGTACGA
TCTCACCNATACTGTTTGTCATGGCAATGCAGATCATGTTAGACGGGGCG
GCCGGCTACGGACNGGGCCTTCAAATAGGGGATCACTGGNTGCCGCCACT
GCGCGCATTTATGGATGACACGACTATTATAACGGGCAGCGAGGAGTCTG
CCCGCACGATCCTGAAAAGATTGGACGCGGTGGTCCAATGGAGCGGTATG
CAGTTCAAACCGCAGAAGTCGAGGAGTCTGTCAATCCATAAGGGCAAGGT
GTCGGCGACCAGTTTTACGGTGGCAAGGAACAAGATCCCCACGGTTCTGG
AGGAACCGGTGAAGAGCCTCGGTCGCGTTTACGATTCGAAGTTATCTGAC
AGAGCGGAGGTCCGGCGAATACACGAGTCACTGGCTACAGGCCTGCTCGC
GATCGAGCGATGCAGGCTGATCGGGAAATTCAAGGTATGGTGTCTCCAAT
TCATGTTGATTCCGAAGCTCCTATGGCCACTGCTAGTCTACGAGGTGACG
ATGACTGCAGTGGAAACCATGGAGAAGAAAATCAACACAGCCTTAAGAAA
GTGGATTGGTGCACCGCCTTGTCTGACCGACGTGGCTCTGTATTGTAAAC
AGGCTAAGCTGGTACTTCCGTTCAAGTCGATAACCGAAGAGTTTAAAGTC
GGCAAAGTAAGACTCGCCATGCTCTTGCGCGAGTCTTCAGACCCAAATGT
CATCGCTGTCCAGCCCGCTCTAAAGACTGGNCAGAAGTGGAGGGTCCTCG
ATGCGATNGAATCTGCTCAGAACGCACTAAAATTGAAGGAGATAATGGGT
TACACNCAAACCGACCGTCGAGGCCTAGGGCACGGGAAGGTCAATTGGTG
GTCAAAGGCCTCAGCCAAAGAGCGCCGAGACATGGTGATAACAAACGGTG
AGGGACAACGAAAACGAGGTTCGGGTCCAGAAAGCAGCCCAGCAGTCGCA
GCAGGGCCATTGGGTCAGCCTGGAGAGCGCATTGCCGAGAATACTCACAT
GGGGTGAGATCTGGCGGATGACCCCGCTGCGACTGAGCTTTATCGTTCGT
TCGGCGTACGATGTATTACCGTCCGGTGTTAACATGGTTAAATGGTCTGC
GACCAACGATCCGACTTGCCCGTTGTGCAAATCGAAGCAGACTCTTGAGC
ACGTCCTGTCCGCGTGCAGGAAAGCCCTAGGTCAAGGCCGATATACCTGG
CGCCACAACAAGGTGCTAAAAGAGTTAGCAGCCGTTGTCGACCAGGCTAG
AATGAGGGCTAACGCCAGAGCCAGTTCTAGTATCGTCCCCATTCGTTTCC
TCAAGGCTGGGCAGGTTCCAAAAGGTAAGGTCAACAAAAACGCATTCGCT
CCATCTGTGCTAGACTCTGCGAGGGACTGGTTACTGGCGGTTGATCTGCC
AGGCCATGAACGGTACCCCGAGTTGATCCGTAAGACCGGCCTGCGACCGG
ACATCGTTCTCCACTCTGCGCAAAAACGGCAGCTCATCCTGATTGAGTTG
ACCGTCCCGTTTGAGTCGCGTATGGAGGAGAATCACNTGTACAAGCTCGA
GAAATACAGTGATTTAGCAGCCGGTCTGAGGAGAAACGAGGCNTACACAG
TACGGGTNTTTGCCGTCGAAGTGGGAGCGAGAGGCCTCGTTTCCACTTCG
CTCTACAATGTGGTTAAAGAACTAGGATTGCGCGGTAATGAACGGAAACG
AACACTCAAAAAACTGGGCGAGGCGGCCGAAAGGGCCTCNAGCTGGCTTT
GGACGCAGCGCAACAACGTAGGGGACGGGCCTCGGTGAGCTGGTCCGGGT
GTCTAGCGGAAAAGAGTTTCTCATCCCTTTGAAAGTCCATCGTGTCCGAA
TTGTCTGCCAGTGTCCCTCTGCCANCTGCTAATAAAAGTCCAACATGTGT
CCGGTAAACCAAAGTAAGCTTGTCGCTCGGTCGTCCAGGCATGCGGACTG
CTCTAATTACGCTGCCGCGGCGACTTCTTATCTCACAGTACCTCCTNCGA
AACCACCAAGTCGTCTTGTCTCTGGCCGAAAGNATAACACCATCCGGTAA
TTCCGTGCAGCGGGGAACCAGCCCTGAGCTTCATGAACTCAGGTGGGCCC
ACCTCCGAANACGTCTAGGAATCGTGGGCCGAAACGCGTGTCGAACGAGG
ATAATTTCTACTGATGACTGGTAGATCCCCGCTGTACTTGCTCCCTGTGA
GTTTATTCCTATT
>rnd-1_family-63#Unknown ( RepeatScout Family Size = 1831, Final Multiple Alignment Size = 100, Localized to 1000 out of 1011 contigs )
GGTTTCCGGGACCTCTCCACGGGTGATCCTCATCCGCATGGTGGCACTTT
GTGTCACCGGGTGTTTATCGCTTGTGTGATGTCCTGGTGGGGTACAACTT
ACATACATACA
>rnd-1_family-126#Unknown ( RepeatScout Family Size = 929, Final Multiple Alignment Size = 100, Localized to 1000 out of 1011 contigs )
AGTCTTAGTCTTAGTCGAGGTTTCAACTTCACTGCAATCGGGTTTCCCCA
TACTTGCTCCGTTCCTGTGCCAGTGAAAATCAAATGAAATGTCCCTCACT
GTCGCATTTGAAAAACTGGTGAACAAACAATTAGTCCCGGNACAATCCAG
AAATATGCGCACGCAGTAAATGCATATGGCAGTTGCTAGAGGCGCCAAAG
CCAACAGTCGCCACCAGAAATGCAGTTTGTCGTTGATGGAAGTAGTCGGG
CACGATAAGTTGGCTATACACACGTAGAATTATTACATAAGGTATTTCAC
CAGCCCACACGTAAACCGGCTACCGGCCATATTGAATACCACGACACAAC
CGCTGCACAAATGAAAGGCATTCCACATGAAAAACACAGCTCACAGGGCT
GCAACCAAGCACTAAACTCAGTAGCTCAGGCAGCGAAACCGTAGACTACC
GTCCATATGTGGAAACTGCATTAGCAAAGCGCTGTCGGAAGCAAAAATAA
CTTCGAAGCTNAACATTCTGCCATGCCTANTCCTCCATTTTGGCCGGAA
>rnd-1_family-416#Unknown ( RepeatScout Family Size = 129, Final Multiple Alignment Size = 100, Localized to 1000 out of 1011 contigs )
TAAATGTTTATATGTTGAGTAGGGATTTTCCTCTCAACACATNCCCATCC
ACCAGATAAACCGGACTANTATCTGAGCTATGTTGCTCTCAGACAAAGTC
CTGGATANCCAAGAAAACAGCCATATTGGCTCGTTACGTGANATTAACGT
TAGCTGNACTTGGTACCCACAGGAGAAGGAGAAGGGATTTTAGATGTCTA
TACACCATACTGAATGAATTATTAGACAGGGCAGNTGACCCCTCCGTCNT
CTACCCTCTCCCGGCGTTATTATAATAATTAAAGAATTATTATATTATTG
AGCCCCCACCAAATGTATTCTATCTTANCAGTTTAATTAAACATGTAAGA
ACAGACACTTGGAATTTAACAAACGATGTAGTATAAAACTTGACATACAG
CTTTATTTACTAACAATGAAATTCCCAGTTTGTTGATTTACACAAACAGT
GACTGGTTAAGTGATGATAGTGATANGCTTCAGCGAGAAAACTGAGCNCC
TGGGATTAGAGTGGTGTGATGATGGTGATATGTTAACATAAAANATGTTA
ACNTAACTTATAGAGCCTCTGACAGCCGTGAGGAACTGTCAAGCTCGTCC
AACTCTTCCTTGCCTGTTCTCTGCCTGTTCCAGCTTGTTCTCCACCTCGT
CCCCACCTCGTTCT
>rnd-1_family-139#Unknown ( RepeatScout Family Size = 873, Final Multiple Alignment Size = 100, Localized to 1000 out of 1011 contigs )
CACCTCTTGACATAAGCTTAGCTTCGGGTTTGACAAAAATCCCATTGGCA
ACCCTCCCATGCTTGGCTGTCCGCGTGTGGCTGCTATAGNTCCATTTCTT
ACACTCAAGGCTGGGTCGACCTGGGAGCCAAGGTCATTTTTGAAAGAAAA
GTAAATCCGGCCTGACCTGATTCCCAGAAATGAACACACCTGTTGTGTTT
GCCCTGTTGTTAACACTGTCACCGACCCATTATGAAAACAGGCCGTGTAC
TACCAGTGGGCTCATGTTTTCTTCTACCATACAGAACGGAGAGTTGGGGG
AGGGGCGGTAGAAGATTGAGAGAAAGTTGAGAAAGAGGGGGAGCAGGAGG
AGGAGAGAGGAATAAAAAAAAAGAGACTAAGAAAAGAAAGTCGGCACTGA
GACATGGGGAAAAAGAAAGGAAAGGAAAAAGAAAGAAAGAAGAGGAGAGA
TACCAGGGGAAGAAGGTAGCAGGAAGGGGGTGCGGCCACCCCGGTATCAT
CACTGTGGGGGGGGGGGGGGGGCAACCACCCCGGGTGTCATTACTGTGCG
GAGATAGACCACCCCGGGTGACATCGCTGTTGCGGGGGGGGGGGGGGGTT
TCCGGTATTTGTTAATTAGGTCACGTCAACTGACATTGGCACATTTATAT
GATCTTTATGTTCGCCTTGCCGGGACGCACAATATGATATGTNTTAAGCC
AGGCTCGCTGGCAGACAACCGTAAATGTATAAGGTTTTTGNTGAAAAATA
AGTCAGCCGGCGGCCATTTTCATATGTTAATTAGGCGCATATCGTAGTGT
ATGTATTTGAGACATGCATAAACAGTTAGGTCTCACTGTCCCGATTCCAG
CGATATATGGTTGCTAAGGGATTCGTTCAGAAACAAAANAGTTATGGCCG
TAAAATGCAAACATTGAGTCATTTCATCTCACTGGGTCGCAGCCGGAATC
CATGTTTTGTCGATTTCCACTATAATTTNTCTGTGGTGGTGTCCGCCACT
AAAATGTTAATATCTCCGCTTAGAATCGACTTACAGGCTTAAATGAGGTA
CCGTTGGATTTGTAATTTTAATCTCTATCTAGCTGTNATGGTTTCGTAAG
TAAAAACCCAAAATATAAAACTTCACTAGCATCCCTA
>rnd-1_family-113#RC/Helitron ( RepeatScout Family Size = 1034, Final Multiple Alignment Size = 100, Localized to 1000 out of 1011 contigs )
GGGGGGGGGGGGGGGCATCAAGGACTATCTCGACGTCGGCGCAGACANTG
ACTGCGACATTAACTTCATTAACCGTGTTAGACACGTGCGATTTCTATTG
TTGTGCCGTTTCATTAATATATCTGGAGTATCTGTCTACGAGAAAACAAT
TGCCTGCGGTTTTGAGTTGTGTTATAATCGGGACACAGTAGTAGGGACAC
ACATCTCNAATAGTTNNGTTCTCTTTTCGTTGCTCCGATNAAGTGGCTGC
TTGGTCGAATGGTTAGAACACTGGGCTCCCGTGCGGGAGACCAGGGTTCG
AATCCGCAGTAGTTAATTTTTTTTTTTACCCCGGGCTAAAATAANATCCT
CACCTGCNCTGTCGTGGCGACAGCACTAGCCATGTNGCCCTTAATACTAA
AAAAAAAAAAAAAAAAAAAAAGACAGGTANGTGGGTAAACCANTTGATAA
TTAAATTTGACCATTTCGCATACTTATGATTNCATTTTTAAACTTTCCGA
TTGCATGGTTACGCTGAAATTTCATAGATTTCCATTTATTTTTCATTTAG
ATTTAGTTATTTCATCTGCGTTGGAATTTTAAGCTGTGCTGTTTACCATA
GCGTTCATTTCCTAATTATGGTGTNTTTTTTCCTGTTTTCGTTTGCTTTT
CAANTGTTTTTTTTTCTCCCAACTACTTCGATGAGGGAAAGAGTNGTCGG
TGAATTTGGGGGGGGGGGGGGGGGGGTGCAAACTGTTAACTGAGAGAGCT
TTAAGTCACAGTAACTGCTTTACCCACTCAAAGTAGCAGCAGCAGTAGTA
GTTGTGGTTGGGCGGTTACACCGTAGTGCTCTCATGCGAAGACCGCCGGT
AAGGTTATGGCGTTCTTCTGTCGGGAAGCGAAATTATACATCCTAACCTG
ACCAGTCCGTGGCGACAGCACTAGCCATGCGGCGCCAAATCTTCTGGCTC
ACGACTCCCTGTCTACTCCGATGGTAAAACAGATAGCAGTGACATTATTT
TAGCTATTGTGGTGGTGGTGGTGGTAGTAGTTGTACTGGTACTTGAAGGA
TGATGTGGTAAATATTACACTAGCCCCATTCACTACCTATTACAATTCCT
GCTCCCCATTTTAGTCCGGATGGACAGGGATGTCAATGTCAGTTACAGCA
ACAACAAAATATCGCCAGGTGATGATTTTCAAATCCTTCGAAGAGGGAGA
GAGCAGTAGTCGGTGGAAGAGGGGAGGGGAGGGGGTAATGACTNAAATTT
AAGAGAACTTAAAGAGCTTTACACGTGATTTTNAAGTTCTCATTACCTAA
TTTGTTTATATTTTACTAACGCTACCTCCGCTNTTCTATTTTTT
>rnd-1_family-77#LINE/I ( RepeatScout Family Size = 1525, Final Multiple Alignment Size = 100, Localized to 1000 out of 1011 contigs )
ATGCTTTCTTAGTGACTCGATGAATATGCTTAAAAAAATCCAAGCTGGAT
TTATCAGGCAAGAATGGATTGNAACACTAAGCACTTCACGAATAGCTGCC
CTAACCTTCATCTTTGTGCCAGGTCATGCGGTGTTCAAGGGAACGAGCGT
GCAGACTATCTTGCTGACACTGCGGTTGCTATGGCTGGTCCAGTACTGGA
CAGAAGTGATGTTATCAATGCCATGCGCTGCACTTACCGTACCGAGGAGC
ACGCCAAAGGACATGACTCCGTATCCCTGTCTAGACTGATGGACATGGGG
GTGCAGCCTGGAGCTGCAAGAATGAACATTTCACTAAGGGGACAAGACGT
TTCATTAACCAACACAGAACAGGCGTCATCAGTCGTTTTACACTTGTGGA
GCTTTTGAGGAGGAGATCGGAGCACCTATGGATCTGTCCGGAGTGCTGTG
ATGATAATCCTTTCTAATCACTAATCACT
>rnd-1_family-424#Unknown ( RepeatScout Family Size = 123, Final Multiple Alignment Size = 100, Localized to 1000 out of 1011 contigs )
AGGTTGTCAGGCTATGAGACTATGAGGTTGTCAGGCTATGAGACTATGAG
G
>rnd-1_family-455#Unknown ( RepeatScout Family Size = 103, Final Multiple Alignment Size = 100, Localized to 1000 out of 1011 contigs )
AAACTACATCTAACTCCTCTCTGCGACGCTTTACGGCATAAGCAGTAGGA
CAAAAGAAAGAA
>rnd-1_family-57#Unknown ( RepeatScout Family Size = 1969, Final Multiple Alignment Size = 100, Localized to 1000 out of 1011 contigs )
TTTTACCCCACCAGGACATCACACAAGCGATAAACACCCGGTGACACAAA
GTGCCACCATGCGGATGAGGATCACCCGTGGAGAGGTCCCGGAAACCCCG
TTCAGCCGTTAGGCCATATTTATGGCCCGGCTATATTCAGGGCCCCCGGC
AAAAGCCAGGGTGGGGCTTCAAATAACGAAAAATTGCATCCCACANGGGG
ACGAC
>rnd-1_family-417#LTR/Gypsy ( RepeatScout Family Size = 128, Final Multiple Alignment Size = 100, Localized to 1000 out of 1011 contigs )
TATGGTGAGGTACTCTTCCACTACCTGATCCAGTTGAAGCAGAATTACCA
GAGTCAAAGACAGTCGAATCACCAGGAGCTGAGGGAAGCATCGACGANAG
AANNGGGATAAGTGCTAGTTTGCCTCTATGACATGCTNTATTCCCCACAG
CTCCNNTGGATTCCAATGATGAANANATGTCACCTCCAGGACCTTCTGNC
TGTTTAGTATCTGGGTATCTGGNCATTGTATCCTGAGATCCATCCACTGA
GATCTGGCATCTACTTCACTATTATATATATGTATATGTTGTACTNATTA
CATGCATTCATTTTCATGGCTGACTTGGGTGTCCCTATTTCACCNTTCTA
AGTGTCTAGCATTTGTGTNTGTGTGAATCNTAAGTGTTATATGTGTTAAC
ATGGTTATGATAGTGAACTATCATAACCTGGGGGCTTTCTTTAGTATAGT
AGTGGGGGTGTCCAGCCAAGTGTGCCTAGGAATATTGTATTCATATACA
>rnd-1_family-279#Unknown ( RepeatScout Family Size = 307, Final Multiple Alignment Size = 100, Localized to 1000 out of 1011 contigs )
TAAGAAGAAACTCCACAGGGGAGCATGTACAGCAGGGGTCTACCAATCAT
CAGTAGAAGTAATCTCTCGTCGACAAATGTTTCGGCCCACGAGCTCCTAG
ACATTTTCAGAGAGTGGGCCCACCTGAGTTCATGAAGCTCAGGGTTGGTT
TCCCCTGCTGCACGNATTACCGGATGTTGTTCGGACAGGGACAAGACGAA
TTGGTGACTTTGCAGAAGGTACTGTGAGAT
>rnd-1_family-444#Unknown ( RepeatScout Family Size = 111, Final Multiple Alignment Size = 100, Localized to 1000 out of 1011 contigs )
ATTAAGGATGTATCCAAATCCCTATTTTCCTGTATACTTTCAAAATACAA
AGAAATAAAAGTAGGTTGAGGAAAGACATTCTGGAGTCACCGAGCGTATT
GTCACAGAGCCTCTCCCTTAAGTTCGGTCACCCTGACCGCACATCAGCAC
GCTCTGTGGCTTCCAAGAATTTCAAGTCCTCCTTTGCATAACTGCCCATA
AGTTTTCTGTTTCCAGTATTCTTTATGGCAGTGGGAANTCCTGCACTCGT
CTGCAGACATCCCGTGTCCTTTCATCCAGGATAATTCAATACTGTCATTG
ATCCTGGTANTGAGCGGGTATTCCAAGCAGTCGCTCGGTAATGTCCCTTT
GTCCGGAGGTTCCTCCTTCCATCGGATAATCAAAGATCCATGCTTTGTCA
ACGGGACTCCTCTGCGCCGTTGACTGACAACCTCTGTGCGTTTCCTCACT
TCGCCGCGCCCTATCTGCCTAGGGAGAGCCTGAAGTGTTCTACTAAAAGG
ATTAGTCGCAGTGCAGGTTGGATCCTCTTCTCCTCCGTCCACAGATTCTT
GAAAAATCTGTCACAAATCTCCTCTTAANACGAGGGATATCTTCACTCAT
CGTGATCCCACGAAGTGGGCGCCGCTTACCACTGACNNTTTCTCTGAAGA
GTGTCCATTTGTCGCCTCCTCGGTGCATTCTGTCCTTACCTTGCCAANTT
GTCGGGGTGGGATTGTCTTTAACAAAGATCAGTCCGGAGTCAGAGCACGA
AATCAGGTCAGGGTATACAGTCAAATCAGTAAGAAACTCAGGTTCGTTTC
CTGNAGACTGCTAAGGTGGNATTTCTTCGCAACGAAGTTTCCACCGNCAG
CTGAGATACTCCTGTCGCTTCCTTCGAAGCGAAGAGTACTACAAGACCAG
AATGTTGGGGTTCCCTACTATTCATGGCTTGTTCNGCTTCAGGGTCCTTC
ATCAGAAGTATCCCTGTCGCCCCAGCTGTACAGGGCAGCAGAGACAAGTT
GTCTCCCTGCCCACGAAAAGTATNTTCTTCTTCGNTAATGGCAAACACTT
CTGTCTGTCCATTATCGACGTGCACAGGCCTAGCAGAATTGTCCTGTTTA
TGTCGAGTCTCTAAGATCGTCAAGACGTCCGGGGAACTCTCCTCCTCGTC
TGCTATTTTCNCCCTGGTCTGGCTTTCATATGCCAAGTCCAGTGAAAGCA
AATNAGGNGGTGTGTTGCCGCCATCGCAGTCAACTCCTTCGGGGTGCAAA
GTCAGAACTAACACATCTCCATTAGGCATGCGGCCGCATCCAAGGAAATA
GGGGACACAGGTTCAGCGTTATTCCCTACATCAGTCTGCTTTAATTCCTC
TTCTTGCATGAAGGGACCGAAGGGGATATGGGAGTTGGGTAAGTCTTTGC
CCTCGTCCTCATTAATGNCTGGTGTGNCAGTCGAACCGCTATGTCTACGG
TTACAACCGTTATCACGCTTGTGACTACTGTCAGGTTCGCTCTCATTTNN
CTCGTCTGAGNTAATGGGAGTAAGGGGTTCCAGCAATGTAGATCTGGTCC
CTTTNGAAGATTTCTGCTTCTTGTTCCATCTTTTCCTTTTAGGCTTAAGA
ATGGAAGTAAAGGGGTCCAGCAATGTAGATCTGGTTATCCCTANAGAAGA
GTTCTCCTTGTTGCCTCTTTTCCCTGTAGGAATAAGAGGGGTGAGGCACT
GTCCTCCGGNTGGTCTATGTTTNCTTCCTCAGCTGNTGAGGTACCATTTG
GCGCAAGGAGTGCACACCTCTCCANTGGTTAGANAGTGAGCCCCCGACCA
TNCCTGCCNGAGTNTCAGCCTGGGGTAGTGGTCAGTTCCCTCANNTACCC
GCATGTTGTCCTCAACGCTAATGTTTTCTGCTTGCNGTTCTATCCTATCT
TTTTCTGCCCTCTCAAGTAGCAGTTTTCTTGANGAANCTTCACTCTTTGA
CAGCCGCATCCTCTCGGCAAATCCTTCCTGAATACACTCTATCTCTCTTT
CTAATTCTTCTCTTATAAGCTGTATGTCTCTTTCATACTCTACTTTCCTT
AGCTGTTCCTCTCTTTCATACTCTTCTTTCCTAAGCTGTTCCTGCCTATT
ATATTCTTCTAGCTCCAACTGGCGCTTTTTCTCTGCAGCATTACGGGCAA
CCATATAATCAAAAGTATCCATCTGGCATTTAATATATGTTTCTAACTGT
GCCCCTACTCTACCCTCAGCTATCCCGAATTTCCTTACATCTTTTTGGTA
CTCGGTACGTAAGTCCATTCTCTATCTATCAGGTCTATCCAGAAATAAAT
ATGATACTTCCTCGAGTCAGGATAAGAAGGATATGTCAGAGCAAAGTACA
GTGAACTTGGCACCAGAGGAGACTATGACAGCCGCACAAAGATGTATATG
ATGCAAAGCAGCCTACCAGATTAACAGCCTATAGAATACTATAGCAGCAA
AAGGATAAACCTATAAATGATCAAAGCGATGTTACACTCAGTCACTAATT
ATTAATCTCAAATGATATGATGTCAGCATGNAATATGTTCTACAATCTAT
ATCAAATGAAATATGCAAGCAAAGGAAAAAATCATCAATTCATCAGACTA
CTANCTAAGCGCTATAGATTAAACACTAATCAATGTTCATGAAGTGTTCA
ATGATAGACAGTTAACTCATATGATTTACCATCAATTAATACTTTTACAG
TTATTATANTGCTAATCTTCAAACCCCAGTTACGCAAGTTACTATTATAA
AGTATGATGCCTTTAGTCTAGGGACTGGAAAAGTTTTTGAAGAGTTAAAA
TGAAATCTATGAAATTAAACTTCTTTTTCGTTAGTCTAGGGTCTGCCGGG
TTTTAGATCGCTGGCGGGACGCCACTTGTGTGCCTCAGGTTNTAATTCCG
GAGAGCGACNCAATTGTTACGTGATGTTATAAACCCCGAGACGAGATACC
CAATTGTCGCTCGATGTTAT
>rnd-1_family-37#Unknown ( RepeatScout Family Size = 2616, Final Multiple Alignment Size = 100, Localized to 1000 out of 1011 contigs )
GTCGGCTCTGTGGCTAAGTCGATGCGAACGCTTCGTAATGCCGGGATGCC
GGGTTCGATCCCAGCTGCGGGCCATGCGCCTTGCGTTGGTTTCGACAGTG
GTATCAAGAAAGCCGACCGTCCAGAAAGCAATGGCAAACTACTGGACGTA
AATTTGCCTAGAAAAACCACACAACAGCCAGGGGCTGTTGGGGTTGGTTC
TGCAACGTCCTGTAAAGGATACGCAACTAACCT
>rnd-1_family-329#Unknown ( RepeatScout Family Size = 213, Final Multiple Alignment Size = 100, Localized to 1000 out of 1011 contigs )
AGATCAAAGAAATTCGCCGCTTTAAGAAAACAGCAGCACCTGTGCAATTG
TAAATTATAAAATCATAAGGACATGGGAAATCTAAGGCCACATGCAAAAT
TCGTGTTGATCCGTACAGGAGTTTTCGAGATATTTGTTAAAGTGTGAGGG
CACGACTTTTGAAACGCACTATA
>rnd-1_family-450#Unknown ( RepeatScout Family Size = 105, Final Multiple Alignment Size = 100, Localized to 1000 out of 1011 contigs )
ATAAGTGAATCCTTTATAACTGAAGTACAAATTCAACAACGATCAAACGT
AACTGCCTGTTTTACCAGGGCAGCCGCAANGTCAGAACCATNTCTTTCTG
TNTACANAGTTCCGGGCGCAGGTGACGAATCGCGGAAGCTTCGAGAAATC
TTAGCGNTCTGCCGTTGGCCGANGTGTGAAGGATTCGAAATGCGTCGTCC
TTGNTTACGATGTGTCCAGANTTTAGAAGATGGCGCGCTATTGCGGAGGG
ATGGTCTTTGCGGCCGGTATTCTCAT
>rnd-1_family-175#Unknown ( RepeatScout Family Size = 626, Final Multiple Alignment Size = 100, Localized to 1000 out of 1011 contigs )
GAACGAACGAACGAACAAACTTTATTTTCAAAGGGTTAAGAATTGGGCAC
GCAGGCCCGTCTAACATTCTGCCCTTCTAGGTCTCCCTCCTTTCATACAT
CATTTCATTCACACATCAAGTAATAGTAAAAATTATCAATAGCATCAAAA
TANTCAATACAAGCACTGGAATGTGCACATTTCTAACTACAGTAAACCGT
AGTAGTTGTAATAAATCTAGGGAAAATGNGCGCTATTT
>rnd-1_family-204#Unknown ( RepeatScout Family Size = 501, Final Multiple Alignment Size = 100, Localized to 1000 out of 1011 contigs )
GGTAGACCAAGAACAAGATGGAAGGATAACATCAGAGAAACTCTACAACA
GCACGATGTGCCTATGGTCGAGGCAGCCAGAAGAGCTAGAAACAGAACCT
TA
>rnd-1_family-145#Unknown ( RepeatScout Family Size = 816, Final Multiple Alignment Size = 100, Localized to 1000 out of 1011 contigs )
ACAAGGGACTGTGATGAACATTCTGTGTGTTTTTCGTTGGCACAGGAGCG
GAGCAACTATGGGGTGACCCGTTTGCTATGAAGCTGAAACTAAGATTACC
AGATTAC
>rnd-1_family-81#Unknown ( RepeatScout Family Size = 1438, Final Multiple Alignment Size = 100, Localized to 1000 out of 1011 contigs )
CCGCAGCTGGGATCGAACCCGGCACCCCGGCATTACGAAGCGCGTTCGCA
ACGCCTAAGCCAC
>rnd-1_family-307#Unknown ( RepeatScout Family Size = 252, Final Multiple Alignment Size = 100, Localized to 1000 out of 1011 contigs )
AGAAAAGATATAAAACCGAACGAAAAGTATATCAGCAAGCTTCACAATAT
AACAAACACAAACAAAACGTGAACGTTGCGGCTATNGAGCCTTCATCAGC
ACATACAAATCAAACAATACTACACAAATACACAAA
>rnd-1_family-392#Unknown ( RepeatScout Family Size = 151, Final Multiple Alignment Size = 100, Localized to 1000 out of 1011 contigs )
TCTTATTCCAACTTTCTCTCTAATGCTGGTATTCGTAACCCTGTCTCTTC
TTGTGTTGTTAGTGACCTTGCGGAGACAGCGCATTTCACACGTAGTTATT
TTCTGTTCTAGTGCCCTATTCATTGT
>rnd-1_family-436#Unknown ( RepeatScout Family Size = 116, Final Multiple Alignment Size = 100, Localized to 1000 out of 1011 contigs )
GTCAGGGCTAGGCGCTCTGAGTCGAGGTGTGTTTGACNCAGATCAATGGG
TGTGTAGTGGGCGGNCTGTGGAGGCGTAANGNATACAGGTACTGACGGTA
AATATTGTGTGTCTGCAGTGCAGATGTGAGGGNGGAGAGAGGATGATCTA
TGTGTGATAGNGTCTATCTATCTCCACTGTATATCTGACTTTCCATCTCT
TGCACTGAACAGACAGATAAATGATAGGAGACTTATTGTCTCCTGGTCTT
GAGAGTGCACTCTGAGGAATGAAACAGGGGAGCGGAGGTGGAGTGAGCTG
ACGTGTGACTNCTGAGATGATTGCTAATTCTGAGTTCTTTCCTGACAGGA
TGATACCCCCTTGGATGATTACTAATTCTGAGTTCTTTCCTGACAGGATG
ATACCTCCTTGGAGGNCAGGCAGACGAATCACAGTCCAACCAACAACCAC
CAACCCATACCATTCTATGCACCAAGCATACCCAAGTCCTGACCTGTTGC
CACNACCTCAACATGGCAGGAGCTTGTGTGTGAGTTCCAGTGGCGAGTGG
ACAGTATTGCAGGCCACCTGTGTCATCAATCCAGGGAACCCTTCTTCAGG
AGCTTTGTTGGGCTCCGGTGCAGTTCCTGTGTCCTCACCTGTGAGA
>rnd-1_family-328#Unknown ( RepeatScout Family Size = 215, Final Multiple Alignment Size = 100, Localized to 1000 out of 1011 contigs )
TACCAACTGCCACAGAGAGCCACGCTGAAGAAATATAATGAACACAGAGC
AAGGGGAAGACCACGCAAGAGATGGAGCGACGNCATCAGGAGCA
>rnd-1_family-238#LINE/RTE-BovB ( RepeatScout Family Size = 401, Final Multiple Alignment Size = 100, Localized to 1000 out of 1011 contigs )
AGAAAGTCAGACCCTTTTCAAATAACATCTGGTTTAAAGCAAGGTGATGC
TCTGTCCCCACTTCTTTTCAACTTGGCCCTGGAGAAAATTATAAGGAAAT
TGAAACAAGAGTGTACTATAGGAGAANCTACAAGAATACTTGGNTATGCA
GATGACATTGATATCGTTGGAGAAAATGAACTAGAGACTGTTAAAACACT
GACTCTCTTAAAAGAANCAGCTCANAAAATGGGACTAGTTATCAATCAAG
ATAAGACAGAATACATGATANTAACTAGACATGGAAAGAATATAAACTCC
GGCCACATNCAAGTCGATAATATGAAAATCAAACGAACGGAAACATATAA
GTACTTGGGTGCAAACTTCAACTGCTCCAACATGCTGAGAGAAGAAATAC
AATCTAGAATACAATCTGGAAATAAAGTATACTATGCCCTTCAACATCTG
CTAAAGTCAAAGTGTCTGTCTCGCAACACCAAGATCAAAATATATAAAAC
GTTGATAAGACCAGTCGTTTTATATGGCTCTGAAACTTGGAGCACAACTA
AAAGAGATGAAGCCTTATTACAGGTTTTCGAAAACAGTCTTACGACGAAT
CTTTGGACCCATCAAAGATGCAAACAGCGGGGAATGGAGAGTGAGAAGCA
ACAACGNAACNCATAATCTGTTTAAAT
>rnd-1_family-41#Unknown ( RepeatScout Family Size = 2526, Final Multiple Alignment Size = 100, Localized to 1000 out of 1011 contigs )
GGGTGAGTAGAGGTTCTGGAAGATATTCAACACTGAGGGGGAAACANAGG
CGGACTTTTAATCAGGTTGCAACTGGTACTATTAGCATGTCGACTCTTCG
TTGGCTACTGAAGAAGGGGACGGAGCACGTGTGGGAATGTCCCGAGTGCA
GTGATGTCAATTCTTGATTCATTCATTCATT
>rnd-1_family-440#LINE/R2-Hero ( RepeatScout Family Size = 114, Final Multiple Alignment Size = 100, Localized to 1000 out of 1011 contigs )
AAGCAGACNCTCGAGCACGTCCTGTCCGCGTGCAGGAAAGCCCTAGGTCA
AGGCCGATATACCTGGCGCCACAACAA
>rnd-1_family-301#LINE/Penelope ( RepeatScout Family Size = 263, Final Multiple Alignment Size = 100, Localized to 1000 out of 1011 contigs )
CAAGATTATCTTTAGTGAGAAACCTAGATTAGTTTACAGACGAGACCGCA
ACCTTAAAGACATACTTGTCCGAAGCCGACTCCCACCGATCCACACAGCA
CTTCCTTTTGGGACTACTGAATGCTCACGCAGCACGTGCAAGACATGTCC
TTTCGTTGTCCAGACTTCTTCGGTCAGTTTCCCTAATGGTTCTTTCCAAA
TTAGGGAACCTTTTACTTGCGAATCCCGCAACGTAATTTATGCAATTATC
TGCAAACGATGCAGCAAGGCATACATTGGGGAAACTGGCAGGAAGCTAGC
TGATCGTTTCCGGGAACACCTCTCCGATATCGACAAGAAGACACTCAAAC
CAATCCCTCTCCATTTTAATAGCTCTGACCACAGAGGTAAAGATGATATA
TCTGTCACAGCATTAAAATCTTGCTCTGGCGATCATACTACGCGCCTCGC
TTTGGAAAATCGCCTCATCCACAGCCTNGGCGTTCTTAGTCCAGGNGGTA
TCAATATCCAACATACCTTCATCTAAATAGTTCTACTCTTATCACATTTT
AAATGTTAATTATTTTATTTTATTTCATATTATTACCTTATTCTATTTCT
TATCAGTATCATTTATGTATCATTAACACTTGCATTTCTTTTATTCCCAG
TATTGTGACTATATTTTTTAGCCATCGTTTATTTTATTTTATTTCATTTA
TTCCGCATCACATTTTTTAAACGTCGCTCACGTCACCCCTTAGAGATCTA
CATACTCTCCATTCCTCGTTTGTGTAGTTCACTTGTGTTTGAAAAAGGCT
GCCCGGCCGAAACGTTACGTTGTGTTGTTTTGTGCACGTTTTTCTGCTTC
CCCATTTTGTTGAGCTTTTTAGTCAAATTTCTCTGGAATTC
>rnd-1_family-138#LINE/RTE-BovB ( RepeatScout Family Size = 879, Final Multiple Alignment Size = 100, Localized to 1000 out of 1011 contigs )
TATTAAAGTCTGAAGTGGAGAANGCCATTAAANAGATGAAGCANGGAAAA
GCCGCAGGTCCNGACAACATAACNGCGGAAATGNTAAAATCATTATCTAC
TTNTGGAATTGATACTATCACAGAAATNTGCAATGGCATTTATAACTATG
GNTACATTCCNAGGGACNTGAAAACGTCTGTTTTTATCACACTGCCCAAG
AAATCAAAAGCCGTTGANTGTGAAGATTACAGAACTATTAGCCTGATGAG
TCACGTAACTAAGNTACTCTTGAAGATAATACAAGNAAGAATTCAAAATA
AAATAGAGAAAGAAAGTNTCTGAGGAGCAGTTTGGATTCCGTAAAAACAG
TGGCACTCGAGAGGCCATAATTTGTCTAAAGATGCTGANTGAAAAATATA
TAGAAGTCCAGAAAAGTATTTATGCATGTTTCATAGATTACAANAAAGCT
TTCGACAGAGTGCAACATGAACAACTAATTGCAGCTCTCCAAAACATAGG
ACTAGATGGAAAGGATATCAGACTTATTAGNAACTTATACTGGGAGCAAG
AAGCAACAGTAAGATATGACAACATCTGCTCACCCCAGATAGAGATCAAG
AGAGGAGTAAGACAAGGATGTGTGCTGTCGCCTAGCCTTTTCAACTTATG
TACAGAAANCATTTTTAAAGAAATTGTAGAATTACCNGGACTGNACATCA
ATGGNAGAATAATAAACAATCTGAGATATGCTGACGACACAGTGTTGCTA
GCAGAGAGCGAGCAGGAGTTGCAAGACCTAGTGGAGCAAGTAAACAGAAG
GAGTGCAGAATTTGGNTTAGATATNAATTTGAAAAAGACAAAAACCATGA
TANTTAGCAAAGAAAATAATCGGCCAACAGTGAACATCACAGTGAACGGG
GNGANATTGGAACAAGTTAAAAGTTTCTCNTATCTTGGACAAGTAATAAC
ATGTGACGGCAGAAGCGAAACAGAAATCAAAAAGAGAATAGGAATGGCCA
AAANCGTCTTCAATAAGATGCGAAAGTTACTGACAGCTAGAGAGATAAAC
AACACATTAAAAATGAGAATCGTCAAATGTTATGTATNCTCAACCCTGCT
GTATGGCGCAGAAACNTGGACAATGAACAAGCAACTAGAAAATCGAATCG
AGTCTCTGGAGATGTGGATATACAGAAGANTAGGTCGTATTTCATGGAAA
CAAAAGCAATCAAATACAGAGGTTCTGGAGAGACTGCGAATGAAAAGAGA
GTTGCTAGGTGAAATAAAAAAGAGACAANTGAAATATTTTGGCCACATTA
AAAGACATAACANTATTNTAAAGACCATACTGGAGGGAAAGGTCGAAGGC
AGGAGAGCAAGAGGCAGACAGCGNTACAAGTGGGAGGACAACATCAAGAG
ATGGACGAACAGCAGTNTGAGAGAGTGTACANCCAGGACAAGAGACAGGG
CNTGTTGGAGATCCATTGCAGCCAACCTTCATTGTGGAGACGGCACCTGA

>rnd-1_family-456#Unknown ( RepeatScout Family Size = 103, Final Multiple Alignment Size = 100, Localized to 1000 out of 1011 contigs )
GGGGGGTTGATGCCAGACACNGTTAGCTGAGAGAGCTTAAAACATTATTT
T
>rnd-1_family-276#Unknown ( RepeatScout Family Size = 311, Final Multiple Alignment Size = 100, Localized to 1000 out of 1011 contigs )
AATAAGAAGAAACTCCACAGGGGAGCATGCACAGCAGGGGTCTACCGATC
ATCAGTAGAAGTGATCCCTCGTCGACAATTGTTTCGGCCCACTACCTCCT
AGACAATCTCGGAGGGTGGGCCGACCTGGGTTCATGAAGCTCAGGGTCGA
TCTTCTCCTGCTGCACGTATTACCGGACGTTCTCGGACAGGGACAAGACG
AAATTGGTGACTTTGCAACAGGTACTGTGAGATTCGGTGTTATATATTGT
CGCTGCGGTAGCATAATTA
>rnd-1_family-245#Unknown ( RepeatScout Family Size = 382, Final Multiple Alignment Size = 100, Localized to 1000 out of 1011 contigs )
GGGGCCGCGTTAGCGCAGTCGATAGGAGGCTCGCTTTCAAATCCAGCTGC
GACTCGCTGCAGCCCACGGTCGGTGTTCGAAACCGGGCGGTTCCCGGGGT
TCACCCAGCCTCTAGGAAATGGGTACCAGAGTTGACACTCTGGGGTAAAT
GGAGGAACGTCGCTGTAGCTACGGAGTTACGTGCGGACGGCGACACAGGC
GGACAGTTTCTTATCAGCTGTCCGTACTGGTGGCAGAGCACTTATGGTTT
ATAACCGTGTGCAATGACGCTGGTTCACATCTCCCGACTTTACCTTTACC
TT
>rnd-1_family-174#Unknown ( RepeatScout Family Size = 630, Final Multiple Alignment Size = 100, Localized to 1000 out of 1011 contigs )
GGCTCTCCTGGCAAATCCGGACGAAGANTGGACGGCCTCGGACGGCTTAG
TCGGAGTTCTCTCCCTTGGCCGCACTCCAAACAGTGATCGGAAAACAAAC
GAANCAAACGACACACTTACCTATCATCATNCGGTTGCGTGTAGGGCTGC
GTACGGTTGCGTGAGGCATCGTGAGGGTTGCGTAATCATCATACGGTTGC
GTGTAGGGTTGCGTAGGGTTAGGGTTAGGGTTAGGGGTAGGGTTAGGGTT
AGGGTTAGGGTTAGGGTTAGGGTTAGGGTTAGGGTTAGGGTTAGGGTTAG
GGTTAGGGTTAGGGTTAGGGTTAGGGTTAGGGTTAGGGTTAGGGTTAGGG
TTAGGGTTAG
>rnd-1_family-319#DNA/TcMar-Mariner ( RepeatScout Family Size = 234, Final Multiple Alignment Size = 100, Localized to 1000 out of 1011 contigs )
ATACAAGGTCCGACAATTAAGTAATGAGACTGATTTTATTATGGCCAAGA
CAAAAATGCCATCTATGAAGCAAAGCATGGAATCCAAAGAGGCAACNTTC
ATCTATGATCTGGCAACTTTTCATCGCCGCCCGATAAGCAGACAACAAAC
AAGCCGCCATTTTGTTGACCTAGTCAGAGGTGCATTGTTACGTAATCAGC
ACGGAGCAAAAAGCTAACATTAAATTCTGTTTAAAACTCAGAAAAAGCGC
CATTGAAACAGTTGAATTGATGCGACAAGTTTATGGGGATAATTGTTTAT
CTCGTGCACAGATTTTCAGGTGGTATTCACGATTCAAAAGTGGTGTGGAA
ATGATTACTAATGCANCTAGACCTGGACGCCNAATTTCTGTTCGTAATGA
TGAACTCATTGCAAAAGTCAGAGAACGGATACAAGAAGATCGTTGTTTTA
CTGTGAGGATGATGGCAGATGAATCTGGTGTTAATAGAGAGACCATTCGT
AANATTTTAGTGCAAGATTTTGGCAAGAAAAAAGTTGCTTGCCGGTTTGT
ACCACATTCGTTGTCTGATGACCAAAAACATCAGCGGGTTGAGTACCCAA
GAGACATCATCAAAACAAGAATTTTTGGCCCCAAAACAAGTGTGTGTTCT
CAGCCNTCCACCCTATTCCCCAGATTTGTCTCCCTGTGATTATTTTCTAT
TCCCAAAATTAAAGTTACGATTGAAAGGACGCTTCTTTGACGATATTGAT
GACATCCAAAGGGCCGTAACATCGACTTTAAGGGCCATAACAACAGAAGA
ACTACAGAGGTCGTTCCAGTGTTTGTTAGATCGTGCCACTCGCTGTATCA
AT
>rnd-1_family-226#Unknown ( RepeatScout Family Size = 430, Final Multiple Alignment Size = 100, Localized to 1000 out of 1011 contigs )
AGCCTGAGGATTTAGGGCCGCATGGCTAGTGCTGTCGCCACGGACTGTGC
AGGTTAGGATT
>rnd-1_family-234#DNA/hAT-Ac ( RepeatScout Family Size = 409, Final Multiple Alignment Size = 100, Localized to 1000 out of 1011 contigs )
ACTAGGGCTGTACCGAATATTCGCTTCGTATTCGCTTCGGGGCCGAATAG
TGGACCTAATAACTATTCGGTATTCGGCCGAATAGTTGCGGTCGGGCCGA
ATACGAATAGTGGTTACCTTACACCCGTTTCTGGACTGGTGGAAAAAAAA
CATCAAGATTTCCCACCTTGGTTCATACTGTCAAGCGTTATCTTTGTGCA
CCACCTACGAGCGTACCAAGTGCCCCTTTATTTCCATCTTGCATGTGTTG
CGAGTATAGTGTTTTTAGGTGTGTTGCTGTAGAAACAAAATGCAACACTT
AAAAATGTAAGAGGGGCAGAAAAGCAAGTGTTCTAGTGTTGTCGGCTTGA
TTTCTTTGAGTGGAGTGTCCTCTTCGTTGATTCTTTGAAGTAACGGGAGT
TCGTCATCATTTATGGGTGTCGTATCTGTTCTTTCGTCGTCTCGTGGAAA
CGGCAGCGGCTGAATGTTTTGATCGACGTTCGGTTTCTTGATTGTCTTTG
TTGTTTGATCTTCTGGCGTTGGCCGCCCGGCGTCTGGTTTCGTGAGCT
>rnd-1_family-312#LINE/I-Jockey ( RepeatScout Family Size = 245, Final Multiple Alignment Size = 100, Localized to 1000 out of 1011 contigs )
GTTGTTGTTGTTGTTATCGATCCAGCGGCGCATGAGCTTTCGCCCTTTGG
CCCAATGCCATGTAGTGGAATTTGCATGTTTTCACAAGCTGTTCTTTTCC
TCCGTACAAGGTGTTCCACTTGTCTGGTCTCGGAGGGAGTAGCGTTCTTC
TNGTCTCGCTGAGTTTTGGGCACTCAAAGAGATGGTGTTCAACAGTTTCG
TAGGGGTAGTTACATAGCTGGCACTCTGGGGAGTGTTGTGGCTGTATTCT
GTTTAGGTGTCCATTGAGTGGAGTATGTTGCGTTCTAAGTCTGAAGATGG
TGGCCTGGTCCCTTCTTGTTAGATGGTTAATGCTGTCATTAGGATCAGGG
CCAGCCATATGTCTATAAACCTCTCTTCCAGTGTCTCCCATGGCCCATCT
GTTCAACCAAGTCTCTTTGTTTATAGCTCTTATAAGTGTTTTTGCTGTCT
GGAGGGTTGTCGCTGTAGGTGGTTGTTCTTGTGTTGCTCCTTTCTTTGCC
AATCTGTCAGCTCTGTCATTACCTGGTGTGCCGGAGTGACCTGGAATCCA
CTGCATCACTATTCTGATGTTGTATGAGGTAATAAGCTGATCAGCATCCA
GGATTATCTTGGCTATGTCAGTTCTGCAGCGTTCACTGCCCTCCAGAGCT
TGAAGGGCAGACATTGAATCTGTGAAGATGACAATATTTTGGACCTTTGA
AGGGTAAACATCCATTACAGTCTTTAGGTGGTATACTGCTGTTTCCAGTG
CAATTATTTCAGCTTCATAGTTTGAACAGAATTCCCCGCATGCATCAAAA
ATCTCTTCAACAGATCCATCGGGATAACCTATGTAGATTCCGTAACCTGC
TTTAATGGTAGCTTTAAATGCTGATCCATCAGTATAGACATGTATCCATT
CTTGGGGGTAAGAATCAACGGTCTTTAGTGATGAGTTCATAAGAGCGATT
GGGTCGGACTGTTTGGTTTCCTCGCCTACCAATTTAATTCGGACTTCTGG
AGCTTTAAAGCGAGCATGTGGTGGTAGGTTTCTTGCAACATTCTGAATTC
CTTGACGTCTTTCTGGGAGGTGGTATCTGTCCTGAATTTCATTAACACAG
TGTAAAACCGATTTGTGCTTTATTCTTTGTTTGTATTCCCAGTTTTCTAC
AAGATGTCTATTAGGATGGTTACGATTTTTCCTAACGCATCTTTCATAAA
TTTCTAAAGTGGCTTTTTCTCTCCGCAACCCGAGGGGTTCCACATTTGTA
TGGATTTCACATGCAGCAGTTGGTGTAGACTGCATAGCTCCGCAGATTAA
TCGGAGGGCATTATTTTGTACTCTGTCAAGAGTCTCTAGGTTAGTTTTGG
AGCAAGTTGTAAGCAGTGAGTTGTTGTACTCTATCACAGAGCGAACATAT
CCTAGATATAAGCCCCTCAGAGTTTCCTTGTCTGATCCCCATGATGTACC
TGCAAGTCTCTTTAATAACTGTAACCGCCTCAATGCCTTATTCCTGACGT
TTTCAATATGGTTCTTGAGGCTGAGCTGCCGGTCAAGTGTGACTCCAAGG
TATGTGGGATGCTCTTCTTTCATCACTTGGTGTTTGTCTAACCTCAGGTT
AATATTCTTCCTTGCTACTTGGTGGCTTTTGGTAAAGATTGTGTAGACCG
TCTTTGCACAGTTAACCTTGAGTTTCCATCTTTGGCAGTACTCATGCAGT
CTTCTAAGGTCTCCATTCAGTCTTTGGGCTCCACTTTCCACATTTTCATG
ACTCTGCCATATTGCTAGGTCATCAGCGTACAAGGCTTTTTCGGCCTTGA
TTTGTTCTGGCAGGTCATTGATAAAGATTAGGAACAGTGTACAGCTCAAT
GATGAGCCTTGTGGCAAGCCCTCCTCCAAGACTTCTTTAGAAGAGATTGC
GTTGTGCATCTTAGTCTGGATTGTTCTATCTATCAGGAAGTATTTCACCC
AGTTATACAATCTGCCATGTATTCCTATGCTCATCATCTTCATCAGGAGA
CCTTTTCTCCATACTCTGTCATAGGCCTGCTGGAGGTCGACAAAGACNGC
CACTGTGTGTTTCTTATTCTGGAAGCCATCATGTATTCTTTGTGTCAGTC
TGAACAGCTGGTCTTCTGTGCAGCTGTTGGTTCTGAAGCCTGCCTGTTCA
TGGCATAGAACACCAGAACTCTCNAGGAACCAATATAAGCGCCTGTTTAT
CATTCTTTCTGCAACTTTGCCCAAGCATGATGTTAAGGATATCGGGCGGT
AGCTTTTGGGGTCATCTGGAGGCTTTTTGGTTTTAAGAATGGGGACGATA
TATGCATTCCTCCATGCCTTTGGAAGTTTGCTTGACCTCCAAGTTTTATT
AATAAGCCTGAGAACTACTTCTCTCCCAGACCGGCCAAGATGTAGCAGCA
TTTCGTTGTGGATCTTATCTGGGCCTGGGGATTTTCTAGGTTTTAATTTC
TTCAGGGCTTGCTCTAATTCATCCATGCTAAATTCATTTTCAAAAAGGGA
GTCGCTGGCTGTTGGAGCTCTCTCTTGTTTCTTCAACTGAGAGAGCTGTG
TTCTATTGAGTTCTGACAGCTTACCTGCTCTGTTAACTGAGGCAAAATAA
TGATTGAAATGTTCTGCTTTCTTCTTGTCTTCAGTGATTGTCTTACTCCC
ATCTGTCACTGGTTTTGGGTTCACCCTTCTACTTTCTCCGGAGAGGTTTT
TAACTAAAGTCCATGCTTTATTTCCATTCTGTCTAAGGTCTAAGTTGGAG
CAAGTTTCTGTCCATTTATCTCTTTTAGCCTTATTAACTACAAGCTTTAC
TCTGGCACATGCTTTATTGTATTGGATCTTTGCTTCTGTTGAACGTGCAG
TTTCGAGCAATATTCTTGCTTTATTCCTTTCAGATATAGTATTTTGAATT
TCTTGATTCCAAAAAGGTTTATATGCCTTCCGGCTGCCCCTTGGGATGGC
TTTCGACGCTGCATTCAGGATTGCTTGTGTTATGTCTTCACAAAAAGTTT
CCACACAGCTGTTGTCAATTCTTCCCAGGAGGCAGTCAGATGTTTCCTGA
AATAGTTTCCAGTTTGCTTTTCGGAAATTCCAACGGGTTCTCTGCTTGAA
GCGTAATTTAGCGGTGGTGCTTACAGTTGTGAGTATAGGTTTGTGGTCAC
TTCCTATGTCGTCCAGGACTTGGGGATAGCTTGCGTCTGCTAAGTCGGAT
GAGCAGATGGTCAGGTCTGGTCGGCTGAGAGATAGGTGGGCCCTGTGTAA
CAGTGTAGGTGTAGACTCTGTGTCCTGCAGCACTAATAGGTTAGTTGTTT
CACAAGTATCTTCGATGTATTTCCCTGTGCTATTGTAGTCAGGGTAACCC
CAACGTGGCGAGTGTCCGTTGAAGTCACCAACAAGAAGGGTTTTATGGTA
CTGTGTCTTGTATAGTTCTGGTATGTTGCATGTTGTCTGAGGTGGGCTGT
ACACGTTGTATATCGTATATTTGCTTCCATTGTGCCAGATAGTTATTTTT
TGCACATCTGTAGGGTGAGATGTCGACAGCATTGTTACATCTCCTTGTAT
GTCATTTCTGATATAGGTCACTATGCCCCGGCAGTCATTGCACTTACAGG
CATAACTAGTATATCCAGTGAGATGCAGATCAGAGTCTTTATGCAGGGTT
TCTTGTAGGGCAGCCACGTGTACCCTGTGGTTGTTTAGCAGTTTGGCAAG
TTCAAGTTTCTTATTTCTTATTCCACAGATGTTCAGCTGCAGAATATTGA
GCATCTGTGTATTTTTTGCTGTGCGGTCTGAGTTCT
>rnd-1_family-25#SINE/tRNA ( RepeatScout Family Size = 3433, Final Multiple Alignment Size = 100, Localized to 1000 out of 1011 contigs )
CAGGAATACGGGAACACGGGAACCTGCGGAATACATCATTCAGCCCTGTG
TTGAGCATTATGTCGACACATCTGGAGCAGGTGGAGGTGTTGCGGTGTCT
GTGGTGTTTGTCAGAGTTAAAGGAAAGAAAGANCAAGGTTCATATGTTGT
CTTTCTCTACAAGTAAATCAAAATTATACATCTCCACCCTATTATAATAT
GTTGGTTTATACCTATCTAATTTATGGCACGATCATATAAAACTTGACAT
AATTAAGCGGCCAGACGCTCGCCTGCGGATCGGAAGGTCGTGGGTTCGAG
TCCCAAACCCCAGGTCGACCCAGCCTTGAGTGGGTACCGGGTGCAGTCCC
GGGAAGTAAAGGCGGCCGGCGTGATGCTGACCACATCACCCATCTNGTGC
CGATTGGTCTATAAAATATAGGTCTAGCCCTATATGCCCACAAAGCTGAC
GACTTTTACTCAAATTATATGTTGCATAATATAATAAACATAAGCAATGT
AATGTATACCCAACTGATGATACCACATGGCACAGGATAATGGTTTATAC
TGTAAGATCTTTACGCAAGT
>rnd-1_family-116#LINE/RTE-BovB ( RepeatScout Family Size = 1014, Final Multiple Alignment Size = 100, Localized to 1000 out of 1011 contigs )
TAGGGCTGTACCGAATATTCGCTTCGTATTCGCTTCGGGGCCGAATAGTG
GACCTAATAACTATTCGGTATTCGGCCGAATAGTTGCGGTCGGGCCGAAT
ACGAATAGTGGTTACCTTACACCCGTTTCTGCATACACTGCGATGGACTG
AAATAACTCTCTCATTAACACAATAGTTGCTGTTGCCTAAGTCTGTCGTA
GCGGGGGAAACTGCGACCCGGTTGCGTGGTACAGCAGCTGGCAAGGTCTT
TGCCTGCTGACTCGACCGAGGCATTACAGCAGAGGTTCTCAAACTGGGTG
CGTATGCCAGGGGTGCCGCGGCGAAAATCAAGAAAAGTCGGCTATAAATT
GTGACATTATTAAAGAAGGCATGAAGATACTTAAAAGTTAAAATTTAAAT
TGTCTTTCCTCGCCACTGTCGAAAAGAGTTTTTTTTTCCTTGTTTCACAC
TCAAAGTGTATCATACTGCATAAAATGCCAACCGCAGCGTGCTAAAATTG
TCTTTGTATTTATCTCGAGGTGCGACCGATCCTCCATCTGTATTCGTGAA
GGTGCAGCGGATAAGTAAGGTTGTGATTACATTTTGGCTGAAATTTTAAA
GTGGAAAATGTGGTCTGTACAATAGTAACTGTTAGCCTCGTCAAGTAAGC
ACTTATATTTAAAGGCAATGCGTTGTGAGTCCTGGACAATCGGTAGGCAG
GCCAAACAATTTCTTGAGGCCTCAGAGATGTGGTTTTACAGAACAATGCT
TAAAATACCCTGGACAGCCAAAAAAA
>rnd-1_family-165#Unknown ( RepeatScout Family Size = 656, Final Multiple Alignment Size = 100, Localized to 1000 out of 1011 contigs )
GAACGAACGAACGAACGAACGAACGAACAAACTTTATTTTCAAAGGGTTA
AGAATTGGGCACGCAGGCCCGTCTNACATTCTGCCCTTCCGACTCCGCTC
CNTNCATACATTATTTCATTCGCACATCGTTTCATAGNTAATAATAATAA
TAATAAT
>rnd-1_family-393#Unknown ( RepeatScout Family Size = 149, Final Multiple Alignment Size = 100, Localized to 1000 out of 1011 contigs )
GGCTCTCCTCCGAACTTCTACCCGATATTATGGCGGCCAAACAAATACCC
TNACAGGGCCTCAGTCNTATGTAAAATGCGGACTTCCTGCCGACGAACAA
ATCGCGGCAAAACTAGGATTA
>rnd-1_family-10#SINE/tRNA ( RepeatScout Family Size = 5117, Final Multiple Alignment Size = 100, Localized to 1000 out of 1011 contigs )
GTCGTGGGTTCGCTCCCTGGCGGAGCCGGACTTTTTTCAAAAATGACCTT
GGCTCCCAGGTCGACCCAGCCTTGAGTGGGTACCGGGTGCAGTCCCGGGA
AGTAGAGGCGGCCGGCGTGATGCTGACCACATCACCCATCTTGTGCCGAT
TGGTCTATAAAAATATAGGTCTAGCCCTATATGCCCTATACGCCTAAAGG
CGTGGAAA
>rnd-1_family-70#LINE/RTE-BovB ( RepeatScout Family Size = 1634, Final Multiple Alignment Size = 100, Localized to 1000 out of 1011 contigs )
GAAGGCCATTGATAGATCCACCCGAGATAGCAGAAAGATGGAGGGAATAC
TTCAATGAGCTCTTTAATCCTCTAGGAGATCATCAGGAAAGAACAACTGA
AGAGCACAGAGCAACAGTGTTAGAACCACACATACTAATGGATGAAATAG
AAAAAGTCATTAAGCAGTCTCCCAAATATAAAGCACCAGGAGCTGATAGA
TTACCAACAGAAATAATTCAAGCAGCAGGTGAAAGCAGCATCAGATGGCT
TCACAGAATATTCAATGCAGCATGGGTACAACAAACGGCCCCTATTGATT
GGCAACATGCAATAGTTATACCATTGTGGAAGAACAAAGGAAGCAAACGA
GAATGCGGTCAATATCGAGGCATCTCTCTTTTAAGCCATGTTGGCAAAAT
GTATGCCAAGATAATAGAAACAAGACTGAGACCAGTGATAGAACCACAGC
TGGCAGAAGAACAGATGGGATTTAGGAGAAATAGAAGCTGCACAGATGCA
ATCTTCACACTTAAACAGTTAATAGAAAAGAACATTGAATACAATAAGAA
CTTATTTGTGGCATTCGTAGACCAGGAGAAGGCATTTGACAGAGTCGACA
GACAATTATTATGGAAAGTAATGGCAAGATATGGAGTAAGCGAACACCTC
ATCGAAGTGTGCAAAAGTTTATACAGGGATTGTAGAAGTGTAGTTAGAAT
AAATCAGGGAACATCTCATCCTTTCACAGTGACATCTGGAGTAAGACAGG
GGTGTGTCTTATCACCACTGCTGTTTATCACCTACATCGACAGTATATGC
AAGAATGCCAAGCCCATGAATGAAGATCTTAGTAAGATCAACGAATTACT
CTTTGCAGATGACCAGGCCTTGATAGCAGATACAGCCATGAAATTGCAAC
AACATCTAACATCCATGAATGAAGAATGTAAAACAAATAATATGAGAATC
AACACTGAAAAGACAGAAGTAATGTCAATAGGAAAAAAGAAGACAGATCT
AAACATAGCAATAGAATACAAAGGCATTAAACAGGCATCTGAGTTTAAAT
ATCTGGGAACTACATTTACCGAAGATGGGAAATTGGATAAAGAAATTGAC
ATTAGATGCAGTAAAGCAAACCAAGTATTGGGACAGCTAGCCCCCCTCTT
ACAGCATAAGACAATCCCAATCAGCACAAAGAGACATCTTATTCAAAGCA
TATTTATTCCAACTCTGTGCTACCAGTGCCAGACATGGTCACTCACAACA
AACCATAAAAGAAAATTAGTAACCACGGAAATGAGATGTCTGAGAAGGGC
TGTAGGAGTGACCATAAGAGATAAGATCAGGAATGAGATCATAAGAGAAC
AAGTCGGCACAGAACCAATTCTGGATTACATACAAAGACAGCAAGTGAAA
TGGTTTGCCCACTTAGAGAGAATGCCTTGTGACACCATACCATACAAAGC
ATACATGGAAAGAGAAGAAGGACGTAGAGCACGGGGTAGACCAAGAACAA
GATGGAAGGATAACATCAGAGAAACTCTACAACAGCACGATGTGCCTATG
GTCGAGGCGGCCAGAAGAGCTAGAAACAGAACCTTATATCTCCCTCGACA
CCCACAGCGGTAAAAGAGGAAGTGAAGAAGAAGAAGA
>rnd-1_family-111#Unknown ( RepeatScout Family Size = 1058, Final Multiple Alignment Size = 100, Localized to 1000 out of 1011 contigs )
TTAGTCGAGGTTTCAACTTCACTGCAATCGGGTTTCCCCATACTTGCTCC
GTTCCTGTGCCAGTGAAAATCAAATGAAATGTCCCTCACTGTCNCATTTG
AAAAACTGGTGAACAAACAATTAGTCCCGGNACAATCCAGAAATATGCGC
ACGCAGTAAATGCATATGGCAGTTGCTAGAGGCGCCAAAGCCAACAGTCG
CCACCAGAAATGCAGTTTGTCGTTGATGGAAGTAGTCGGGCACGATAAGT
TGGCTATACACACGTAGAATTATTACATAAGGTATTTCACCAGCCCACAC
GTAAACCGGCTACCGGCCATATTGAATACCACGACACAACCGCTGCACAA
ATGAAAGGCATTCCACATGAAAAACACAGCTCACAGGGCTGCACCAAGCA
CTAAACTCAGTAGCTCAGGCAGCGAAACCGTAGACTNCCGTCCATATGTG
GAAACTGCATTAGCAAA
>rnd-1_family-155#LINE/RTE-BovB ( RepeatScout Family Size = 748, Final Multiple Alignment Size = 100, Localized to 1000 out of 1011 contigs )
AACAAAGATGCAATAAAGCCAATCAAGTTTTAGGCCAAATGGCACCAATT
TTGAAATGCAAGCATGTGAATATGAACACTAAAAGAACACTGTTCAACAC
AATATTCTTACCAACGCTATGCTATCAATGTCAAACATGGACACTGTCTT
CAGAAGACAGAAGGAAAATAGTCACGACAGAAATGAAATGTTTACGTACT
ATGCTAGGTGTAACGAGGAAAGATCGACTTAGGAACGATGATATCAGGAG
GAGAGTCGGCACAGAACCAATACTGAACTTTATAGGTAGACAACAAATCA
AATGGTTTGGCCATGTAACAAGATTGGCATCAGACAGGGCACCACAGAGA
GCAATGTTATACAGATACAGCGGTAACAGANCCA
>rnd-1_family-428#Unknown ( RepeatScout Family Size = 122, Final Multiple Alignment Size = 100, Localized to 1000 out of 1011 contigs )
TCTTTTANTTTANTTCACCCCATCTCGGGGACTCCGAGATTTCGTGGGGA
GTTCCCGGGAAAGTCCAATANTATAGGGGTGTTAGGGTGTGAAATGAACA
CCGACTAAC
>rnd-1_family-239#LINE/I ( RepeatScout Family Size = 399, Final Multiple Alignment Size = 100, Localized to 1000 out of 1011 contigs )
TTTGGAAAGTCATTCTCTTCACTACTTAACCAACAATGTACACCTGAAGA
GCTATCTTTCGATCTCTGGGACTCCGAATTATTGACACTCAATGTGTCAA
CATCCATCCCGAACCTGGGAAACAAAGATGCTGAGCCCGCTTTAGTGAAG
AAAGCACTCACAATGGAACACCTCAACAACATGTTCCCACAGGACAGCTG
GACGAGAATCTACACGGATGGATCAGCAAAAGAGGCAACTACGAATGGTG
GGGCAGGTGTTTACATNAAACACCCAGATGCCACTACTGTGTCCCTAGCA
GCCCCCACCGGACGAACTTGCTCTAACTACAAGGCAGAACTCTCAGCCCT
ATTGATGGCAGCACAGTATATGAACAATCTGCAAATCACCGCAGGCAGGA
TGGTTTTTCTCACTGACTCACTGTCAGCTATACAGGCCCTTGAGTCCAAA
CCTACCGACAGCACACTACAAAGTCTAACANAGGAACTTGCTATGTTGTC
AAANAAGGCAGAAATTCACTTGCAGTGGATTCCGTCTCACTGTGGCATCA
AAGGCAATGAAAGCGCAGATGCTTTAGCCAAGGAAGGCAGTAACAAACCA
CAGACCTACCAGCCACTATCTTTTCCAGAAGTCAAAACTCTCATTAAGAG
AAAATCAGAAACAGATTGGAAAACCAACACTGGTTATAACTACGAAAAAG
ATTTTCTGAAACACTTGAACAGAACAGACCAAGTCACAGTTTTTCGCTTA
CGCACTGGACACTGCAGACTCAATAAACACTCATATAAATTAGGTATGAG
CCAAACAGCTCTCTGCCAGTGTCTTCGTGCTGAACAGACTCCAGAACATG
TCCTGCAAGACTGTCCTCTCCTGGCGGAGCTGCGGAGCGACATGTGGCCA
CACCCAGTAGACCTGACAACTAAGCTTTGGGGAAACCTAAGAGACCTTGA
GANGACATCCCAGTTTATGGCCCACAGTGGATTATGCGCATGACCAGAGA
TCGCTGAAGAAGAAGAAG
>rnd-1_family-358#LINE/I ( RepeatScout Family Size = 181, Final Multiple Alignment Size = 100, Localized to 1000 out of 1011 contigs )
TGGAACTGTCGGAGTGCTAGGCAGAGAGGTCCTGTACTGGAGAGGTTGAT
TTNTGATTTTGATGTCATCATGCTCCAGGAGCTAAATACAGACAGATATC
ATTGCCCTGGGTACGTCAGTTATATAAACCCTGCTGGACAGGAGAGACAT
GGACAANGTCTGCTGGTGAAGGAGGGAGTGAAGCATGTGGTGCTTGACCT
GAGCCAGTGGAATCACAGTGCACGAGAGGTTCAGGGNATACAGGTGGANA
TTGGTGGCNCAAGTTGGAACCTCGTAAATGTNTACGCCGCNGTNGACTCT
TTTGTCACAAGGGAACANTGGGACTGGCTCAAGGAGTTGGAGGAGATNCC
TGGCGATAGGCTNCTCATNTGTGGGGATTTCAACGCGNGGAACAGAGAAT
GGGACAGTANTGGGGAAAACCGACAGGGAATTGCTCTTGCAGAGGCCATG
GTCGATTCAGACGTGGTCTGCATAAACGATGGGAGGCCGACTAGAATGGC
AATGAGGCCTGGNGATGCAGACACGGCTATTGACTTGGCGTTTGTTACCC
AGTCGGCGGTNCTGGACGCNAAATGGACTGTCCTGGGCGATCATGGGAGT
GACCATCTGCCATGTTCGGTCTTGATTTCTAAANCCAGCAAGGTCAAGGC
TGCGAGAGCGCGCAAGACCTTCAAGTATGAGCGGACCAACANCCTTCTTG
GACGCCTCCGACAGAGGGCATGCAANAGAACCGCCAGATCTACTTTTGTG
CAGCCTCCATGGTGGACNCCAGAAGTAGAACAGGCATGGAAGGCAAAGAG
AGCCGCAGTGAAGCAGCTAAAGAAAGTGCGACAGACACCCTCAAGCTCAC
GAGAGGAAGTGGAGATGGCGGAGAATGTGAAAAAAGATAAGGTGGAGGTT
TTCAAGCGCTGTGCNGCAGAGGCCAAAAGAGCAAAGTGGGAAACTTTTGT
GAATGATAAAACATTGGGGAAGTTCTGGAAACTGCANAGGCAGATGCAAA
GAAAAGATCGGCCTATGACAGTNGGAACAATTTGTAGAGACGATGGTGTG
CGTGTGACAACAGACAAGGAGAAAGGGGAGGCTTTTCTNCANAGGTTTAT
AGCTCAGACAGATCATAATGATGTAGACATCAGGGATGCAGTTAGAGAGG
AGTTAGCTGGCACCTTGAAGAATATGCATTATGAAGACATGATACGAGTG
GAAGATATCAAACANATTTTGAAAAAAGCAAAAGACACTGCACCAGGGCC
TGACGGNGTCAGGTATGGCCACATGAAGGCCTTGAGCGATGNAGACCTGG
CGGAGATGGCCGACTGCTTTAACCAGAGCATTAGGACAGCATCAGTACCG
CAGGACTGGGTGCACAGCTATCTAATCCCACTNCCAAAACCTTNCAAAGA
TCATTCNAAGCTCAGCGGCTTTAGGATCATCACCCTACAAAACACNTTTG
GGAAGGTCTTGGAGAAGATAGTTGCTGTAAA
>rnd-1_family-121#Unknown ( RepeatScout Family Size = 974, Final Multiple Alignment Size = 100, Localized to 1000 out of 1011 contigs )
ACAAGCTAGATGTTGTGAGGGCCCTTTGGGAGCGAGTGAACAGTGCGGAG
GCACAGATAGATCATTACGGTCTGAGGAGAATGGCGCTG
>rnd-1_family-449#Unknown ( RepeatScout Family Size = 106, Final Multiple Alignment Size = 100, Localized to 1000 out of 1011 contigs )
GGGGGAAGCCACCGCCAACGAACGTAGAAATACAAAAACATCCCAGTTTC
GATACTCACGAACCGTCGCGCCTTCGGCGCTTCCCCCTGCAGTACTTCTT
ACTTGTACACAGGCGCCTGCGGCGCCTCAAAGAGACTCA
>rnd-1_family-164#Unknown ( RepeatScout Family Size = 668, Final Multiple Alignment Size = 100, Localized to 1000 out of 1011 contigs )
GAAGGGTTGCGATATCCATAGTACCGAGCCAAAGGGTTTACAACTCATGG
TTTCTGGATACGTTAAAAAAAAAA
>rnd-1_family-325#Unknown ( RepeatScout Family Size = 221, Final Multiple Alignment Size = 100, Localized to 1000 out of 1011 contigs )
CTGTCACATACCGCTCCTGTCGCGTGCCTGATTTAAGGATTTCTCCTTAA
GAACCAACAGCACTCTGAAATAATNATGTTGAGTCGTTTGGCTCGTATTG
GTCTAAGGGATNCCCCGTGGCCAATATACGCTCAACTTATTTCAGGAGTA
GGGCAACTCAAGTTTTGGCACTACAAAATATATAATATTCCTAGGCACAC
TTGGCTGGACACCCCCACTACTATAAAAAGANAGCCCCCAGGTTATGATA
GTNTACTATCATAGCCATGTTAACACAGATAACACTTANTANTCACACAN
ACATAAANGCTAGACAGTTAGAACGGTGAAANAGGGACACCCAAGTCAGC
CATGAAAATTTATGCATGTAATAAGTGCAACACATATACATATAT
>rnd-1_family-235#LINE/RTE-BovB ( RepeatScout Family Size = 409, Final Multiple Alignment Size = 100, Localized to 1000 out of 1011 contigs )
AATGATTTCATAGAACATCAAAGAATCAAATGGTTTGGTCATCTGGTCAG
AATGGAACAAAATCAGCCAGCAGCTAGAGCGTACTACATGAGAACAGCAG
GCTACAAGGCAAGAGGCCGACCAAGAAAGAGATGGGTGGAGGGAGTAAAA
GAGACACTACAGAAACGCAATATGACATTAACACAAGCTACGCAACTAGC
AAAAGACAGGAAACTACA
>rnd-1_family-230#LINE/RTE-BovB ( RepeatScout Family Size = 417, Final Multiple Alignment Size = 100, Localized to 1000 out of 1011 contigs )
TTTTACTCCCTCCACCCATCTCTTTCTTGGTCGGCCTCTTGCCTTGTAGC
CTGCTGTTCTCATGTAGTACGCTCTAGCTGCTGGCTGATTTTGTTCCATT
CTGACCAGATGACCAAACCATTTGATTCTTTGATGTTCTATGAAATCATT
TACCGGTACTGTGCCTACCATTGTTCTTAGTTCTTCGTTGGTGACTCTGT
CTCTTCTTGTT
>rnd-1_family-362#Unknown ( RepeatScout Family Size = 176, Final Multiple Alignment Size = 100, Localized to 1000 out of 1011 contigs )
GGGGCTTCAAATGAAAACCTTAAAAGTGTGATAGAAATTACAATAACCAT
GCCATTGTCTTGTAACCTGTCAATATTGTTGTTAAGGATGTCAAGAGTGT
TAAGCACGTGACATCACGGTGCAGACGAACACGGTGACGTCATAATGACA
GTTTAAAGATGGC
>rnd-1_family-381#Unknown ( RepeatScout Family Size = 158, Final Multiple Alignment Size = 100, Localized to 1000 out of 1011 contigs )
TGTCACATATCGCTCCTGTCGCGTGCCTGATTTAAGGATTTCTCCTTAAG
AACCAACAGCACTCNGAAATAATTATGTTGAGTCGTTTGGCTCGTATTGG
TCTAAGGGATNCCCCGTGGCCAATATACGCTCAACTTATTTCNGGAGTAG
GGCAACTCAAGTTTTGGCACTACAAAATATATCTGTATATGAATACAATA
TTCCTAGGCACACTTGGCTGGACACCCCCACTACTATACTAAAGAAAGCC
CCCAGGTTATGATAGTNCACTATCATAACCATGTTAACACATATAACACT
TANTANTCACACANACACAAATGCTAGACACTTAGAANGGTGAAATAGGG
ACACCCAAGTCAGCCATGAAAATGAATGCATGTAATCAGTACAACATATA
TATATATATAATAGTGAAGTAGATGCCAGATCTCAGTGGATGGATTCCAG
AATACAATGNCCAGATCACAAAGATACTAAACAGCCAGAAGGTCCTGGAG
GTAGCACNTNTTCATCATTGGANCACAGGGAGCTGTGGGGAATANAGCAT
GTCATAGAGGTAAACTAGCACTTATCCTCTTTCTATCGTCGATGCTTCCC
TCAGCTCCTGGTGATTCGACTGTCTTTGACTCTGGTAATTCTGCTTCGAC
TGGATCAGGTGGTGGAGGAGTACCTCACCATAGAGGACACAGCAACTGNA
TAGGNACTCAGCA
>rnd-1_family-425#Unknown ( RepeatScout Family Size = 123, Final Multiple Alignment Size = 100, Localized to 1000 out of 1011 contigs )
AAAATAAAACTCGTGTATCTTCGAATATTTCGCGGCGCCCCTGTGAAGAG
GTCGCGGCTCCCCGGGG
>rnd-1_family-55#Unknown ( RepeatScout Family Size = 1987, Final Multiple Alignment Size = 100, Localized to 1000 out of 1011 contigs )
TTCAACCCCACCAGGACATCACACCGAGCGATAAACACCCGGTGACACAA
AGTGCCACCATTCGGATGAGGATCACCCGGGGACAGGTCCCAGAAACCCC
GTTCAACCCATAGGTTGGGTTATATTAGGGCCCCCGGCAACAGCCAGGGT
GGGGCTTCAAAA
>rnd-1_family-233#LINE/Penelope ( RepeatScout Family Size = 411, Final Multiple Alignment Size = 100, Localized to 1000 out of 1011 contigs )
TCAACTGCAAGAGATGTGGCATGAAATACATCGGTGAAACGGGTCTACGA
CTGGCTGACAGGTTCAGACAACATCTTTTGGATGTGCAGAACGGTGCCCT
GAAACCAGTACCGTTGCACTTCAATTCCCAGGATCACCAAGGTGTCCACG
ACATGGAGGTGACAGCCATTAAATCTAGCCACTCCAGCGACAGAGTCCGC
AAGTCTCTTGAGAATCGCTTTATTTACACTTTGGGNACTTTAACGCCCTA
GGGACTGAACTGCCAACACAGTTTCATCTAAACTCCTAGGGGACTGAACT
GCCCACACAGTTTCATCTCAAACCCTCNAGTTACGGCCCCTGGCACTCCA
CGGGGTATTTATTCTCCCGGCCCCACGTGTCGTCAGTCTACTGAGAAACA
ATCGACCCGGCTGCTTCGAGATACCAAGCTAAGTGATTTTGTGTATTTGT
GTGGTATTGTTTGATTTGTATGTGCTGATGAAGGCTCCATAGCCGCAACG
TTCACGTTTTGTTTGTGTTTGTTATATTGTGAAGCTCGCTGATATACTTT
TCGTTCGGTTTTATATCTTT
>rnd-1_family-122#Unknown ( RepeatScout Family Size = 962, Final Multiple Alignment Size = 100, Localized to 1000 out of 1011 contigs )
GGAGCCAAGGTCATTTTTGAAAAAAGTCCGGCTCCGCCAGGGAGCGAACC
CACGACCTTCCGATC
>rnd-1_family-240#Unknown ( RepeatScout Family Size = 398, Final Multiple Alignment Size = 100, Localized to 1000 out of 1011 contigs )
ACACATCCGATTTCAGCAAACCCTTAATTAGTCGCCTTTTACGACATGCT
TGTTAA
>rnd-1_family-209#Unknown ( RepeatScout Family Size = 489, Final Multiple Alignment Size = 100, Localized to 1000 out of 1011 contigs )
AGGACGACGCATTTCAAATCCTTCACACGTCGGCCAACGGCAGANCGCTA
AGATTTCTNGAAGCTTCCGCGATTCGTCACCTGCGCCCGGAACTCTGTAN
ACAGAAAGANATGGTTCTGACCTTGCGGCTGCCCTGGTAAAACAGGCAGT
TACGTTTGATCGTTGTCGAATTTGTACTTCAGTTATAAAGGATTCACTTA
TTTGCTTCATTTATGTAATTGTTACTGTAGTATGCACCTGACGAGATACA
GCGAAATATGCCAGGCAATAAATTGTGCAATCTATTGTTTGTGTC
>rnd-1_family-355#DNA/TcMar-Mariner ( RepeatScout Family Size = 186, Final Multiple Alignment Size = 100, Localized to 1000 out of 1011 contigs )
ACAGTTGAATTGATGCGACAAGTTTATGGGGATAATTGTTTATCTCGTGC
ACAGATTTTCAGGTGGTATTCACGATTCAAAAGTGGTGTGGAAATGATTA
CTAATGCAACTAGACCTGGACGCCAAATTTCTGTTCGTAATGATGAACTC
ATTGCAAAAGTCAGAGAACGGATACAAGAAGATCGTTGTTTTACTGTGAG
GATGATGGCAGATGAATCTGGTGTTAATAGAGAGACCATTCGTAANATTT
TAGTGCAAGATTTTGGCAAGAAAAAAGTTGCTTGCCGGTTTGTACCGCAT
TCGTTGTCTGATGACCAAAAAACATCAGCGGGTTGAGTACCCAAGAGACA
TCATCAAAACAAGAATTTTTGGCCCCAAAACAAGTGTGTGTTCTCAGCCN
TCCACCCTATTCCCCAGATTTGTCTCCCTGTGATTATTTTCTATTCCCAA
AATTAAAGTTACNATTGAAAGGACGCTTCTTTGACGATATTGATGACATC
CAAAGGGCCGTAACATCGACTTTAAGGGGCCATAACAACAGAAGAACTAC
AGAGGTCGTTCCAGTGTTTGTTAGATCGTGCCACTCGCTGTATCAATGCA
CAAGGGGCTTACTTTGAATAAAATACAGGTTATATCTTCAACTGTTGATT
ATTTTAATTTTTATGGAATTAGTCTCATTACTTAATTGTCGGACCTTGTA
TGT
>rnd-1_family-117#DNA/hAT-Blackjack ( RepeatScout Family Size = 1004, Final Multiple Alignment Size = 100, Localized to 1000 out of 1011 contigs )
CTCCTGGCAAATCCGGACGAAGAATAAACAGCCTTGGACGACTTAGTCGG
AGTTCTCTCCCTTGGCCGCACTCCAAACAGTGATCGGAAAAGCCACGAAA
CAAAACGACAGTCACGTCGACATCAGGGCTGCCAATGCTTGGTTGTNTCC
CCCAGATCTGGGTTTTTCTTTCGACGCTGCGGGGAAATCTGGGGTGTTTT
TTTTTGTGTGTTTTGTTTGTTGGTGTTTTGCCGATCTGTATGCTTTAATG
ACCGATAAATTTGCGTGGTTAGGGGTAGGGTTAGGGTTAGGGGTAGGGTT
AGGGTTAGGGTTAGGGGTAGGGTTAGGGTTAGGGTTAGGGTTAGGGTTAG
GGTTAGGGTTAGGGTTAGGGTTAGGGTTAGGGTTAGGGTTAGGGTTAGGT
TTAGCGTTAGATGTGACAATTTTGACGCCGGAGTTCCCTATAATCGCGCA
CAGTCGCATACACACNCAAACAGTCGANGGACTGTGGATGCTACTGAAAC
GGACAATTCGCCACCGATTGGGCACCAGCCGCGCGCTATTGNCGTCATAT
TTGGCAGAGTTCCAGTGGCGCCACTCCCACAAGCATCAGATTGTCGGCCA
GTATTTCGAACTCCTACGTCAAAATTTTCACATCTAACCCTAACCCTAAC
CCTAACCCTAACCCTAACCCCTAACCCTACCCCTAACCCTAACCCTAACC
CTAACCCTACACGCAACC
>rnd-1_family-112#Unknown ( RepeatScout Family Size = 1049, Final Multiple Alignment Size = 100, Localized to 1000 out of 1011 contigs )
AAGACAGTGGCATGGAGGAATATCATCAGTGGAATTGATCCAGAACACCA
AAGACCGAGATCTGTGGAGATGCATGAACGCCTACGCCAGCTGGCAAGGC
ACTTGATGATGATGA
>rnd-1_family-79#DNA/P ( RepeatScout Family Size = 1498, Final Multiple Alignment Size = 100, Localized to 1000 out of 1011 contigs )
CCACGTCCGTCTGTATATTCGGTCCTNACAACTGAATCACGGTACATTTT
GGAGGAGTCCCCTCGAAAATNGGTTACTGGAAGCGTTTCCATGTTGCATT
GTGTGACATTTTAATGTGCTTACAAAGTTCTGTGTTCTGAACGTATTCGT
ATTACAAATCGACAAGCGGATATTGTGAAGTGGATATACAAGATTTTCAA
ACTTTGCTGTTAGATTACAGCAATTTTAATTTTAATTCACGGGAGACAGT
CGTGTTGTGATGTGTGTGTCACTGTTTCTAGTCAGTAGTTCGGATTTTTG
GGAACTGGCTGTTTATTNCTTTTCTACTTTGAATGTAGAAATCTTACTTT
TAGGGANAATACAAACAGGTAATTTAGAAGCCATATCTGGAGAATATCGA
CAGTTGTCAGGTGCAAACTATCTTGTGTTGGAAGAAAACTATTGCTTTCA
TATTGACTGTGCATAAATGGTGCAACCACACTGTGGATAAATTGTGTCAA
GATATTTCGGAGCTCTGGGTAAGTGGATGAAAATAATATTTAATTTACTA
ACTAACCTCTCACAGCAAGTCACTCTTTGCCTCTTTACTAATTGTTGACT
AACAGTATAATTATATGTTGTAGNAGTACACTAATAATATTAATCCTTGT
AACCGTTTNGCTTTGCTTCGCGAACACTGGCTGTAAACTCTTGCGGAAAC
TTCTGGTNGTTCATCCACTTCTTNTGCATATTTGCAGTTGTA
>rnd-1_family-403#LINE/R2-Hero ( RepeatScout Family Size = 137, Final Multiple Alignment Size = 100, Localized to 1000 out of 1011 contigs )
CGCATTCGCTCCATCTGTGCTAGACTCTGCGAGGGACTGGTTACTGGCGG
TTGATCTGCCNGGCCATGAAAGGTACCCCGAGTTAATCCGGAAGACCGGC
CTGCGACCNGACATAGTTCTCCACTCT
>rnd-1_family-0#RC/Helitron ( RepeatScout Family Size = 14294, Final Multiple Alignment Size = 100, Localized to 1000 out of 1011 contigs )
GGGGGGGGGGGGGCAAACTGTTAACTGAGAGAGCTTTAAGTCACAGTAAC
TGCTTTACCCACTCAAAGTAGCAGCAGCAGTAGTAGTTGTGGTTGGGCGG
TTACACCGTAGTGCTCTCATGCGAAGACCGCCGGTAAGGTTATGGCGTTC
TTCTGTCGGGAAGCGAAATTATACATCCTAACCTGACCAGTCCGTGGCGA
CAGCACTAGCCATGCGGCGCCAAATCTTCTGGCTCACGACTCCCTGTCTA
CTCCGATGGTAAAACAGATAGCAGTGACATTATTTTAGCTACTGTGGTGG
TGGTGTGGTAGTAGTTGTACTGGTACTTGAAGGATGATGTGGTAAATATT
ACACTAGCCCCATTCACTACCTATTACAATTCCTGCTCCCCATTTTAGTC
CGGATGGACAGGGATGTCAATGTCAGTTACAGCAACAACAAAATATCGCC
AGGTGATGATTTTCAAATCCTTCGAAGAGGGAGAGAGCAGTAGTCGGTGG
AAGAGGGGGGGAGGGGAGGGGGTAATGACTNAAATTTAAGAGAACTTAAA
GAGCTTTACACGTGATTTTNAAGTTCTCATTACCTAATTTGTTTATATTT
TACTAACGCTACCTCCGCTNTTCTATTTTTTACGACTTACTTTGTTATTT
ACAAGTACAGTTGTAGCTTTACTTCCGTCTCCTATAAAAATACAAACAGC
TTTAGCATGTGATAACCAAATAACCATTTTTGTTACTGTGCTAATAACAC
CATTTAAACGACCACTAATATAAAGACACAATTATATGGTGCGTGTTCTA
AAGTCGGAAAACCAGACTATCTCTATATCTGTGCAGAGAATGATTGCGAC
ATTAACTATATTAGACACGTGCGATTTCCATTGTCTTTCTTTTCCAAAAA
CCTTTGATGAGGGAGAGAGTAGTAGGTGGATTTAGTTGTGGTGGTGGGGG
GGGGGGGGGGGGGGCGGGGATCGAAGACTATCTCTATATCTGAGCAGACA
ATGATTGCATATTAGACACGTGCGATTTCTATTTTCTTTCATTTCCATTT
AGCCAAACTATGCCACAGCAACGCGTGGCCGGGTACAGCTAGTATATATA
TATATATATATATATATATATATATATATATATATATATATATATATATA
TATATATATATATATATATATATATATATATATATATATATATATATAT
>rnd-1_family-128#Unknown ( RepeatScout Family Size = 925, Final Multiple Alignment Size = 100, Localized to 1000 out of 1011 contigs )
AGCTTAGGAATCCTTCAAAGATTAAACTGGTACTTTGAATGCGCCAANNT
TTAATCAGAGAGGTGANACACGTCTGGACACCTNGGAAGTCNGGCAAAGA
ATGCCCGCGCCAAATCACGCTTGGCGTCTCTAGGAAAGAAGTCCCTGTAT
TCGTGCCCAAGGAGTAAACCGGCTTCCAGGAATTTCCGAATAATACTCCA
GAAAATATCTATCCCACAGTTGCAAGTTTGAAAATGNAGACTTNTCAAAG
CAACTAGAGGGTNTAGAAATGTNTATTTCACCAGATAAAGGTATATATCG
ATATAAGGGACTATATACCCTCCGGACGGGTCTAAGTTTGAAATGTGACC
TGCCCGCTAGGGGCGTCAACGTCACGACTNGTCCANCGTGTAGGGTTGGC
TGTTCACTTCACGACATAAGCTTAGCTTCGGGTTTGACAAAAATCCCATT
GGCAACCCTCCCATGCTTGGCTGTCCGCGTGTGGCTGCTATAGATCCATT
TCTTACACTCAATGCTGGGTGGACNTGGGAGCCAAGGTCATTTTTGAAAG
AAAAGAAAATCCGGCCTGACCTGATTCCCAGAAATGAACACACCTGTTGT
GTTTGCCCTGTTGTTAACACTGTCACCGACCCATTATGAAAACAGGCCGT
GTACTACCAGTGGGCTCATGTTTTCTTCTACCATACAGAACGGAGAGTTG
GGGGAGGGGGAGTAGAAGATTGAGAGAAAGTTGAGAAAGAGGGGGAGCAG
GAGGAGGAGAGAGGAAGAAAAAAAAAGAGACTAAGAAAAGAAAGTCGGCA
CTGAGACATGGGGAAAAAGAAAGGAAAGGAAAAAGAAAGAAAGAAGAGGA
GAGATACCAGGGGAAGAAGGTAGCAGGAAGGGGGTGCGGCCACCCCGGTA
TCATCACTGTGGGGGGGGGGG
>rnd-1_family-152#Unknown ( RepeatScout Family Size = 777, Final Multiple Alignment Size = 100, Localized to 1000 out of 1011 contigs )
AGGGAATGAACGAGCGGATTGGCTTGCTGGCAGGGCCACGGTAGGTACAG
GANAAGCAATGGACCGGGCCGATATTCTCAATGCTCTCAAGGAGGCAGGA
CGAGAAGATGATTCAGGAGACGACGGTGAATCGGCAACACTCAAAAGACT
ACAAGAACTTCAGGTCAAAAGAGGTGTCGCCAAACATGAACACTATACAG
GTAGCCAAAGAAGAATAGTAAACCAACACAGAACTGGTGTTATCAGTCGC
CACACGCTGAGGGATATACTGAAGATGGGATCCGAGCGCTTATGGACTTG
TCCGATGTGCAATGAGGATAATCTGTCGATTAACTAACTAACTA
>rnd-1_family-399#Unknown ( RepeatScout Family Size = 143, Final Multiple Alignment Size = 100, Localized to 1000 out of 1011 contigs )
TTATATATATGTATATGTTGTACTNATTACATGCATTCATTTTCATGGCT
GACTTGGGTGTCCCTATTTCACCNTTCTAAGTGTCTAGCATTTGTGTNTG
TGTGANTANTAAGTGTTATNTGTGTTAACATGGTTATGATAGTGNACTAT
CATAACCTGGGGGCTTTCTTTAGTATAGTAGTGGGGGTGTCCAGCCAAGT
GTGCCTAGGAATATTGTATTATATACAGATATATTTTGTAGTGCCAAAAC
TTGAGTTGCCCTACTCCNGAAATAAGTTGAGCGTATATTGGCCACGGGGN
ATCCCTTAGACCAATACGAGCCAAACGACTCAACATAATTATTTCNGAGT
GCTGTTGGTTCTTAAGGAGAAATCCTTAAATCAGGCACGCGACAGGAGCG
ATATGTGACA
>rnd-1_family-135#LINE/RTE-BovB ( RepeatScout Family Size = 900, Final Multiple Alignment Size = 100, Localized to 1000 out of 1011 contigs )
CATGTTTTATAGATTACAAAAAAGCTTTCGACAGAGTGCAACATGAACAA
CTAATTGCAGCTCTTCAAAACATAGGACTAGATGGAAAGGATATCAGACT
TATTAGAAACTTATACTGGGAGCAAGAAGCAACAGTAAGATATGACAACA
TCTGCTCACCCCAGATAGAGATCAAGAGAGGAGTAAGACAAGGATGTGTG
CTGTCGCCTAGCCTTTTCAACTTATGTACAGAAANCATTTTTAAAGAAAT
TGTAGAATTACCNGGACTGNACATCAATGGNAGAATAATAAACAATCTGA
GATATGCTGACGACACAGTGTTGCTAGCAGAGAGCGAGCAGGAGTTGCAA
GACCTAGTGGAGCAAGTAAACAGAAGGAGTGCAGAATTTGGNTTAGATAT
NAATTTGAAAAAGACAAAAACCATGATANTTAGCAAAGAAAATAATCGGC
CAACAGTGAACATCACAGTGAACGGGGNGANATTGGAACAAGTTAAAAGT
TTCTCNTATCTTGGACAAGTAATAACATGTGACGGCAGAAGCGAAACAGA
AATCAAAAAGAGAATAGGAATGGCCAAAANCGTCTTCAATAAGATGCGAA
AGTTACTGACAGCTAGAGAGATAAACAACACATTAAAAATGAGAATCGTC
AAATGTTATGTATNCTCAACCCTGCTGTATGGCGCAGAAACNTGGACAAT
GAACAAGCAACTAGAAAATCGAATCGAGTCTCTGGAGATGTGGATATACA
GAAGANTAGGTCGTATTTCATGGAAACAAAAGCAATCAAATACAGAGGTT
CTGGAGAGACTGCGAATGAAAAGAGAGTTGCTAGGTGAAATAAAAAAGAG
ACAANTGAAATATTTTGGCCACATTAAAAGACATAACANTATTNTAAAGA
CCATACTGGAGGGAAAGGTCGAAGGCAGGAGAGCAAGAGGCAGACAGCGN
TACAAGTGGGAGGACAACATCAAGAGATGGACGAACAGCAGTCTGAGAGA
GTGTACANCCAGGACAAGAGACAGGGCNTGTTGGAGATCCATTGCAGCCA
ACCTTCATTGTGGAGACGGCACCTGATTGATTGATTGA
>rnd-1_family-14#SINE/tRNA ( RepeatScout Family Size = 4390, Final Multiple Alignment Size = 100, Localized to 1000 out of 1011 contigs )
GGATTTTTGTCGTGGTATGGGACGTCGCAGGTCGACCCAGCCTAAAATGG
GTACCAGGATGGGCTGTCCTGGGAAAGTAAAGACAGCCGGCGTAATGCTG
ACCACATTACCCACAGAGTGCTGATGGTCTGTAAAAATATGGGACGCTCT
GCCCATATGCCCGATGCGCCGAAAGGCGTGAAAAGGGATCTTTACTTTTT
TTT
>rnd-1_family-378#Unknown ( RepeatScout Family Size = 162, Final Multiple Alignment Size = 100, Localized to 1000 out of 1011 contigs )
TCAATTCTGAGTCTCTCAGCCTCACGGGCTTCCATCCTCATCTCACGTTC
CGTGGTTTTAATCCACTCGGTCATTTCTTTACCCTCCAATCCCATCTGGA
CAGCCATGTCCTTCAATTCCTGNATGGAAATTTTTGACTGCGACATGCTG
TCTTGTCAATCTAACAGTCCACAACAAAATATATTGTCACCAACAATGTA
AATATAATCAACAATAGATTAAATTATCACCACCAACCAAGGTTGTACCT
AACCCAATGTACTTGAACACCACAAAACACCACAATGATTACAAATCACT
CCTAGGAGTATACTCTAAGAACTGACCCAGAATGGTCACAACTGTGTTAA
CAAAAAAACAAACACTGAACAACTCCTGGCCAAGATCACCAGCAAATTTA
AAGATTGAACAGTGTACAAAACAATCCCACGACGAGACCACAGATTTTTG
GGGATATGTTGTTCTGTCACATATCGCTCCTGTCGCGTGCCTGATTTAAG
GATTTCTCCTTAAGAACCAACAGCACTCNGAAATAATTATGTTGAGTCGT
TTGGCTCGTATTGGTCTAAGGGATNCCCCGTGGCCAATATACGCTCAACT
TATTTCNGGAGTAGGGCAACTCAAGTTTTGGCACTACAAAATATATCGTA
TATAAATACAATATTCCTAGGCACACTTGGCTGGACACCCCCACTACTAT
ACTAAAGAAAGCCCCCAGGTTATGATAGTNCACTATCATAACCATGTTAA
CACATATAATGAAGATACATACANACACAAATGCTAGACACTTAGAANGG
TGAAATAGGGACACCCAAGTCAGCCATGAAAATGAATGCATGTA
>rnd-1_family-434#Unknown ( RepeatScout Family Size = 118, Final Multiple Alignment Size = 100, Localized to 1000 out of 1011 contigs )
TAGGGTTAGGGTTAGGGTTAGGGTTAGGGTTAGGATTAGAAGACACTAGA
TGAACACTCAAAAAAAGCACCACACAACAGCACACTTGCACCCCCTGAAA
TANTAGACTGTCCCGTGACCTGTGGATTTCCCACGGATTTCCTGTTTGGG
GTAGGNTATNAATAAAGCACC
>rnd-1_family-404#DNA/TcMar-Mariner ( RepeatScout Family Size = 137, Final Multiple Alignment Size = 100, Localized to 1000 out of 1011 contigs )
GCAAAAGGGCTGCCTGCAAAGGACATTCATAAGGAAATGCTTCCTGTTTA
TGCTGACAAATGTTTATCCCGTAAAGCGGTGCATAGCTGGGTAAAAATTT
TTCTCAAGGACGCTCTAAAATTGTTGATGAAGTCCGATCTGGTCGTCCTG
TTGAGATTGCAACAGACGCATCCGTGCAGCGGTGGAGNAGNTGCACTAGG
GTGCTGACAGGCGAGTAACGGTTGACTCTGTAGCAGCTGCANTAGGGTGC
TGACATGGTTCAGCATACAACATAATGCATGATCGATTGAAATTTAAGAA
AGTGTGCTCAAGGTGGGTACCCAGACAATTGA
>rnd-1_family-146#Unknown ( RepeatScout Family Size = 809, Final Multiple Alignment Size = 100, Localized to 1000 out of 1011 contigs )
ACCGGGAAGGCTAACCCGGTCAACAAATGCCCGCAGAAGTCGGATGTGTC
GGCCGAAAGGTGCAAATATCGCAGCCATGCTGTAAACGGACACAACGCAA
TTACATCTTCGGATGAACGCAGAAGAAGAAGAA
>rnd-1_family-283#DNA/hAT-Charlie ( RepeatScout Family Size = 300, Final Multiple Alignment Size = 100, Localized to 1000 out of 1011 contigs )
CAGGGCTATTCAACTGGCGGCCCGCGGGCCAAATCTGGCCCGCGGAGGCC
TAGCAAGTGGCCCGCGGATCATTGCCAGTTGTATTGTATTAATGATCTTT
CTATGCTGGGGCTCGGGCCTCTGGCCCGTGACGATCCCCATTTTCAAATT
TTGGCCCCTGAGTAAACTTAGTTGAATAGCCCTGATNTAG
>rnd-1_family-371#RC/Helitron ( RepeatScout Family Size = 169, Final Multiple Alignment Size = 100, Localized to 1000 out of 1011 contigs )
TGATTGCGACATTAACTATATTAGACACGTGCGATTTCTATTGTCTTTCT
TTTCCAAAAACCTTCGATGAGGGAGAGAGTAGTAGGTGGATTT
>rnd-1_family-385#Unknown ( RepeatScout Family Size = 155, Final Multiple Alignment Size = 100, Localized to 1000 out of 1011 contigs )
GGCACTCTTCCGAATACCGGTCCCAAATTATTCACTGCNAAAAACATCCC
NTTNAGGGCCTCAAGAGGTTATGTAGTAAAAACATTTAGGCCATCATCAT
CAGTTTCCACTTCTGGCCGTTAAGCGTCGTGGGGAGNAATAGTTTTCGAT
CCACTGAAGCGNCGTGGGGAGGAATAGTTTTCGATCCATTGAAGCGNCGT
GGGGAGGAATAGTTTTTGATCCATTGT
>rnd-1_family-187#Unknown ( RepeatScout Family Size = 547, Final Multiple Alignment Size = 100, Localized to 1000 out of 1011 contigs )
GATGAACTGCATTTCTAATGTCGGACTGTTTGTGTTAGCACTTCTGACGG
CTGCCNTATGCTTTAATGCGTGTGTATGCTAGATATGCTGAGACNGCAGT
CTGTCAATCTTTCCACAAGGGACNGTGAT
>rnd-1_family-431#LINE/RTE-BovB ( RepeatScout Family Size = 120, Final Multiple Alignment Size = 100, Localized to 1000 out of 1011 contigs )
GTCTTGGTCAGATATGACTGAGCTACCGTATAACAGTAGCCGGTACTACC
TGTCTTCTGTTACGCCGAATGTTGGGCGGCGTATACCAACCCGACATCCC
ACATTGTGCCAACGGCTTCGGGCGGAGGAGCGCATTGGGGAGGATACTAG
CCTTATCCTAGGAAGAGGAAATGCAACCTGAAAACTTTATGTTATGGCAG
GGCAGACCAG
>rnd-1_family-289#Unknown ( RepeatScout Family Size = 286, Final Multiple Alignment Size = 100, Localized to 1000 out of 1011 contigs )
CTGCATCAATCTCACCAGACTGTGGTGATCCATCTGCTCCTCCGAACTGT
ACACGCTCT
>rnd-1_family-56#Unknown ( RepeatScout Family Size = 1976, Final Multiple Alignment Size = 100, Localized to 1000 out of 1011 contigs )
TGACTGACTGACTTTCTACCCCACCAGGACATCACACAAGCGATAAACAC
CCGATGACACAAAGTGCCACCATGCGGATGAGGATCGCCGTGGAGAGGTC
CCAGAAACCGCGTTCAGACANTTGGCCATATTTATGGCCTGCCTATATTG
CGGCCCCTGGCAAAAGCCAGAGTGGGGCTTCAAATAACAAAAAATTNCGT
CCTAAAAAGGACGAAA
>rnd-1_family-96#Unknown ( RepeatScout Family Size = 1233, Final Multiple Alignment Size = 100, Localized to 1000 out of 1011 contigs )
ATCATCAATCAGCAGGTCCTTTACAGAACGTCGCTCTCTTCACGGCACGC
CTGAAAGTCTCCCTTTCTCTAGCCAGTTCTCCAGCCCTATGTGCTTTCAN
AGCCAATGCATCTTCAATGTCTTGTATCCACCTTCGCGGAGGTCGGCCCC
TGCCTCGCCTTCCGGAAACTGCACCCTCCATCACCGTT
>rnd-1_family-242#Unknown ( RepeatScout Family Size = 389, Final Multiple Alignment Size = 100, Localized to 1000 out of 1011 contigs )
CAGTGTCACGCCATGCACTCAACTCAGAAGCTGGGCGACGAAACTATATC
CTTCCAGTCTACAAATGGAGCAAAAATGCAACGGCCA
>rnd-1_family-91#LINE/RTE-BovB ( RepeatScout Family Size = 1263, Final Multiple Alignment Size = 100, Localized to 1000 out of 1011 contigs )
AATAAGAGAAATGTCTGGGCAACCACTAGTATCAACAGTTATAAGACAGA
GAAGATGGCGCTATATTGGACACATCCTGAGAAGAAACGAGCAGAGAATC
ACCAAACAGGCACTAAAATGGGAAATAAAGGGATTGAGGAGGCGAGGACG
CCCAAAAGAAACCCTAAGACGAACGTTGATGAGAGAGGCCAAAGNTGCTG
GACTGGATTCCATCCATGATATCGAANTGATTGCACAGGATAGAACGGAA
TGGAGGAATAGACTGCGAGCCCTATGTGACATATAATGGCACAACAGGAC
AATGAATGA
>rnd-1_family-193#Unknown ( RepeatScout Family Size = 529, Final Multiple Alignment Size = 100, Localized to 1000 out of 1011 contigs )
AACAGGGCCTCAGTCACGTGTCAATTGCGCACTTCCGGCGACTTAANTTG
CGGNCTTCCGGCGACTACCGCCACCGCCGAGAGTATCCCCCACGCCGCTC
GCGCGGCGTGGATTGGGGCTAAACTAGATGGCTGGGACTCACGAGCAGCA
GCTNCCGCATCTCCTGCAGCT
>rnd-1_family-182#Unknown ( RepeatScout Family Size = 576, Final Multiple Alignment Size = 100, Localized to 1000 out of 1011 contigs )
GTTTTAGGTNCTTTATTAATATCCTACCCCAGATGACGTCACAGGACAGT
CCAACATTTTAGAGGGTGGTAAGACTGGGTTTCCCGGCTTTCTGATGCTT
TTAACGACCCCAAAACATCTAGAACTGGCCCTAACCCCAACCCACCTACG
TCCCACGAGAGAGTGCAGCCTAGGTCCCACGACTGCATGCAGCCTATCTA
CCACCCCCTGAAATATTAGACTGTCCCGTGACCTGTGGATTTCCCCTGTT
TGGGGTAGGATATTAATAAAGCACCCA
>rnd-1_family-320#Unknown ( RepeatScout Family Size = 232, Final Multiple Alignment Size = 100, Localized to 1000 out of 1011 contigs )
TGGTTTTCGGACAGTGGTACGAGAGTCGCACCGTGGAAGAGATTGGGGCC
TCACCACGTAATATT
>rnd-1_family-363#Unknown ( RepeatScout Family Size = 176, Final Multiple Alignment Size = 100, Localized to 1000 out of 1011 contigs )
TTCTCACGCCAGTGTCAGAATGTTATCTCCTGACCAGACTGTAGAGACTG
AGCGGGGCCCTTTTGAACAGGGGAATTGAGTGGACGCTAGACATTGTGGA
GNCGAGAGGTCGGAGTTTCGCACGTCAGTGTAATTCTGGGGAGAACAGGT
GTTTGGCAATTAGGAATGTTTATCTTGGTCTNGGTCAAGTAGGAAACACG
ATGGCTTCACTGACCGTCTTTCACACCTGCCAGTTAGATTCGGTGTAAAC
TAGATTGGGCCACTTAAGAATGTTTGCTCTAGGGATGTCAGTCCAGAATT
GAGTGACAGGCCACTTGTTAGCTAATTTGATCTGATAGGTACCTCAGAGG
CGNGGCTTAAGTCATCNTCTTGAGGGTTGGGTAGAAACTAAGNAAAGGGA
GGAGTTTAACTTGGACAATAGATTGATACTTATACTTCGAGCCTGTGGAA
TTCCCGTCATTAATCGCAGCCTGCCGGCAAACAAACAGGTCGACGTAAAG
GTATATTTTACTGTCGGATTCTGGTTTGGCGATTGCTGGAAAGTTCCCAG
GTAAGAGTANATATTAATTTTAATCTTGTATACATAGGTTAGGGAGTTAA
GCTTAGTCTATNCTACCTTTTCCTAATTTGTCTGCACATTCTGCTTGAAA
TAGTTCTTTGTGAGTATTCAGTATCTCAGTTAGGGAACTGCTAAACTATT
CCTATTTCTTGTATGTTTGTGTCACATGTTTTTCAGTGTATGTTTTCATG
TGTATAAAATAAGACGTGAACAATGACATTTGCTATAATGAAATGTAATT
ATATTGTTTCCACGATCAACCAAAACATGAGTTTGGACTGTGGGAAATGA
TGCCCAAATATGTGCAGGGATGCTGCTACGTTTTGTGTGCCCACCATGTG
CTCACTTAATGTGTTCACCTAAACAGGGGATTTATAACCCCAGGGGAAGA
ATGATGGGTGTATAGNATTCACTGTCACTGAAAGATAATATTCAGGACAG
CGTGCACGTATAAAATGTTTGCGTGTTCAGCACATAACCTGCGCCACGTG
TTCATGTCAAATCAATGTCAGCCAGTTGGAAGTCTGAGTGANGACGGACA
ACAGACTTAGAAAGTCAACTATCATGACATAGCATTAGAGGGAAGGCAGG
ATATGTGACGTCCGTGTGAGACAAAAGACCTTCAGACTAGACTGGAGAGA
ATGTGGAATATGAGGAGGAGTGATGGGATATATTTTATTATTATATGTTG
TATTAATTGATACATGTATTCTTAGTGTAAGTCAAGATACTACACGTATG
TGTTTTGTTTCCATGATTACAGCGCCCATGTGACGATCAGTCCATGAAAT
AGACTACATTGTGTTAGACTCGGCCAGCTGGGAACGAGGTGGAG
>rnd-1_family-350#Unknown ( RepeatScout Family Size = 192, Final Multiple Alignment Size = 100, Localized to 1000 out of 1011 contigs )
ATAGACAGATATTCCAGATATATTATTGAAACGGCACGACAATAGAAATC
GCACGTGTCTAACACGGTTAATGTCGCAATCATTGTCTGCGCAGACGTAG
AGAT
>rnd-1_family-274#Unknown ( RepeatScout Family Size = 318, Final Multiple Alignment Size = 100, Localized to 1000 out of 1011 contigs )
GTACGAGAGTCGCACCGTGGAAGAGATTGGGGCCTCACCACGTAATATTC
CCAAAGACAGCAGTGGGTACACTGTAGCCAACCTTCATTGTGGAGA
>rnd-1_family-144#LINE/RTE-BovB ( RepeatScout Family Size = 838, Final Multiple Alignment Size = 100, Localized to 1000 out of 1011 contigs )
ACACGACAGTTGCCTCAAACATAACATGAAGATCAATACNGAAAAAACAG
AAGTNATGAGCATAAGTAGAGAGCAACAGACCACCGACATANAGATTCTG
GATNACNGCCTAAANCAAGTGCAAGAATTTAAATACTTGGGAAGTATNTT
TACAGACGATGGNAGAATNGACAGAGAGATAGAAGCAAGAATCCAGAAAG
CNAACGCNGTCGCATACCAACTCGCCCCNATTTTAAAACATCCAGNCGTN
ACNACGGAGACAAAAAGACAAATTATAAATACCATCTTCATNCCGACATT
ANGCTACCAGTGCCAGACNTGGACATTAACAAAAGCACACGAGAGAAAAA
TAACCACCTGCGAAATGAGATGTCTGAGAAAGGCNGCGAATAAAACCAGA
AGAGACAGAGTGAGAAACGATGACATTACAAGAACTGTCGGAACCACACC
CATCGTTAAATTCATCGAGAAGCAAAGAATGAAGTGGTTTGGCCACCTAA
TGAGAATGNAACCAACGATGCCAGCATCACGAGCATACAACATGAAGATC
GGNACACCAAGAGGCAGAGGAAGACCGAGGANAAGATGGATNGACGGNGT
ATCAGAGANCCTGCCAACACGGCCTNACAACANCACGAGGTGCAACGCGC
CCTGGCCCAGGATCAGAAAACTGCGNCTCCCCACNACGCTGTGAGGCAAT
CGTGGACAAGACAAGACAAGACAAG
>rnd-1_family-17#Unknown ( RepeatScout Family Size = 3964, Final Multiple Alignment Size = 100, Localized to 1000 out of 1011 contigs )
AAACGGATGTACACGCAAAACTCAGGTTCTGGAACAAGACCGAAGTCCAG
AAGTGGACGAACAACCAGAACTTTCCGCCGGAGTTTACAGCCGGTGAACG
CGAAGAAGAAGAAGAA
>rnd-1_family-400#LINE/L2 ( RepeatScout Family Size = 142, Final Multiple Alignment Size = 100, Localized to 1000 out of 1011 contigs )
AGCAATAGGATCCTTCGNTGTGCTGCACCAGTTATTTGCGAGTCGTTAAC
NTTTATATATAACCAGTGTCTTGCCAAAGGCTACTTTCCNTCAGCATTTA
AAATTGCCAAAGTNTATCCTCATCTNAAATCTGGCTCATTNGACAGTAGT
NTTCCAGGTAGCTATAGACCNATCTCCCTACTATCATCACTATCAAAACC
ACTAGAGAAACACATTCATAAAATAACACTTCAACATTTAGATAACAACA
AACTNATAGTCGATAACCAGTCAGGGTTTCGACCNAAATATTCTTGCCAT
ACTGCCTTAACAAACATGACAGAAAACTGGCATCANAATATCAACGATGA
NAAAATTGCTGGGTGCGTGTTTATAGACTTTAAGAAAGCCTTTGACATGA
TAGACCATAATATTCTTATTAGAAAACTAGAAACAATGAACTTCAACCGT
AATCTATTAACGTTAATAAAATCCTTTTTGTTAAATAGGAAACAAGTAGT
CTCNTACAATAAATCCCTATCGCAGACTACTGCGTTAAATACTGGNGTNC
CTCAGGGCTCGATTCTCGGCCCTCTGTTATTTGCCATTTACATAAATGAC
CTTCCNTTACGTCTGTCGTCGNCGTGCGATTTATTCGCAGACGACTGTAC
NATCTATACAAGTGCTCAAACGTGTAATGNNCTAGAGTCGTCNTTACAAC
AAGAATTAAACAATGTNGTTNAATGGAGCAATGCAAACCGCATGCAAATN
AACATTAGTAAAACNAAATCTATGCTAATAACAACNAGACAAAAGCTATA
NACTTTATCTGCACANAGNACGCTTCAACTCTACATCGGTAACAACCCAG
TAGAAAGTGTAACTGAGCACAAAACNTTAGGCNTGATNATTGATGGAAAT
CTAACCTTCAATTCTCATGTNCAAGCNCTNGTGAAGCAAACAGCTAAAAA
GGTATACCAGCTTGCAAAAATTAAACACTTTCTGGATGAAAACACNAGAA
AGATATTCTATACNTCCCACATTCAGACNCATATAGACTATTGCTCCACA
GTATGGGATGGCTGTCCAAATTCAGTCATCAAACGGCTNAGNTCACTNCA
AAANNGNGCCGTNCGCTTAGTCAGTAATAATCATGGAAGAGACAGTTCCA
GCNTATATAAAGATCTTANGCTACTTCCGTAAACGNCTACTTTTCAATAA
GGCCAAATTTATTCACAAAATCTTATCTNAAAATGCTCCANATTACCTTT
GGCCGTTGTTTAAATATAATGGACGACATAGCAAACGCCTAAACATATTA
CATATCCCTAAACCTAGAATAGACCTATACAAAACAAGTTTGGCGTACTC
CGCAGCTCATCTGTGGAACCATCTTCCACAACCGATCAAAAATACCAANA
GCCCCTATACATACAATCGGAAACTNTTTGAATATTATCTCACTACAGAC
TACATGCCCCCTTAGAAGATAAAGTATCCTAAGAATAGCGTTGATTTCCA
CCAAGATTTATTACANTTAGTATTATAATTGTTTTAAAATGTAGGCATAC
TTAGAGCGCATTGTTACAAAGATGTTGTTGATGATGCCTGTAATTATTAT
TATTATTATTATTATTATTATTATTATTATC
>rnd-1_family-33#Unknown ( RepeatScout Family Size = 2896, Final Multiple Alignment Size = 100, Localized to 1000 out of 1011 contigs )
TAGGTAGGTAGGTAGGTAGGTAGGTAGGTAGGTAGGTAGTTGTACCCCAC
CAGGACATCACACAAGCGATAAACACCCGGTGACACAAAGTGCCACCATG
CGGATGAGGATCACCCGTGGAGAGGTCCCAGAAACCCCTTTCAGCCGTTA
GGCCATATCTATGGCCCAGGCCATATTTATGGCCCGGCTATATTCAGG
>rnd-1_family-177#Unknown ( RepeatScout Family Size = 612, Final Multiple Alignment Size = 100, Localized to 1000 out of 1011 contigs )
CACCTTTCTCAACATGCTCTGTGAGTCAGTTACAATCACGGCATGTGTGT
ACAGCTGATTCTCAAGCCAGCGGAA
>rnd-1_family-370#Unknown ( RepeatScout Family Size = 171, Final Multiple Alignment Size = 100, Localized to 1000 out of 1011 contigs )
TGTCACATATCGCTCCTGTCGCGTGCCTGATTTAAGGATTTCTCCTTAAG
AACCAACAGCACTCNGAAATAATTATGTTGAGTCGTTTGGCTCGTATTGG
TCTAAGGGATNCCCCGTGGCCAATATACGCTCAACTTATTTCNGGAGTAG
GGCAACTCAAGTNTTGGCACTACAAAATATATCGTATATAATACAATATT
CCTAGGCACACTTGGCTGGACACCCCCACTACTATACTAAAGAAAGCCCC
CAGGTTATGATAGTNCACTATCATAACCATGTTAACACATATAATGAAGA
TACATACACACACAAATGCTAGACACTTAGAANGGTGAAATAGGGACACC
CAAGTCAGCCATGAAAATGAATGCATGTAATCAGTACAACATATATATAT
AATAGTGAAGTAGATGCCAGATCTCAGTGGATGGATCTCAGGATACAATG
TCCAGATCACAAAGATACTAAACAGCCAGAAGGTCTTGGAGATGACATNN
TTTCATCATTGGAANCCANNGGAGCTGTGAGGAATANAGCACATAAGGCA
TCAAACTTAGCTTATCCTCTTTCCGTCGNTGATGCTTCCCTCAGCTCCTG
GTGATTCGACTGTCTTTGACTCTGGTAATTCTGCTCNACTGGATCAGGTA
GCGGAAGAGTACCTCACCATAGAGGACACAGCAACTGTACNGGNACTCAG
CAAGTCTCTCCCACCAGTCAGGTCACAACACTGTCTCTGAGCTACACCAA
GCTCTGGCACTGGTAGGCTGTTTGGGGTATATGNCCCCCCATNTTGGNGA
TGTCAGGAACCTTCACAGGTGTTAGCTGGTGGGTAGTTGGTTGGTGGTTG
GTTGATGGTTGGTGGGTGTTGGTTGGA
>rnd-1_family-294#Unknown ( RepeatScout Family Size = 275, Final Multiple Alignment Size = 100, Localized to 1000 out of 1011 contigs )
GGTAAATTTTACGCTGGTCTCCCCATTTACACACCGCTACACACTAGCTC
GCTTCTGATTGGNCGACCTACAGACTAGCTCACTTCTGATTGGTCGGCCT
CGAGCCACCCGACCTTCGCACAAGGTTACGGGGGTGTTCCGCAATGCCGT
TGATATCGCGTGTTGTATATTTCAGCACGCCAGCGCTTTTAACACTCCAA
AAACATNNAGAAACTGGGTCTAACACACAACCCCCCTAGAGAGTGNCGNA
ACCTATGTCACAGGCATTCTCTTTCTCGGAAATAAAAACGTAAATGCAAG
ACAACAACAGANCGCGACACCCGTAACCTCGACCACGGTAGACCAGTCCA
ACAAACTTATCAATGGAANGTGACCTACAACCGGTGGTGTGTAAATGGGG
AGACCATCGTATAA
>rnd-1_family-254#LINE/RTE-BovB ( RepeatScout Family Size = 365, Final Multiple Alignment Size = 100, Localized to 1000 out of 1011 contigs )
CAGAGATGGTCAAATATATGGGAGTCGAAGGTGAGCGCCTTCTACTGAAG
GTTCTCCAGGCAGCCTGGTGTAGCAAAACTATACCAAAAGATTGGGAGAT
TGCCATCATTATACCTATATTTAAAAAAGGTGATAACAGACAATGTGAAA
ACCACAGAGGCATATCCCTCCTCAGCGTTCCCGGTAAAAGTTACTCTAGA
ATTCTTGAGCAGAGACTTAGAAGTCTGGTAGAGCCACAGCTGGACGAGGC
CCAATGCGGCTTCAGAGCAAACCGAAGTACTCAAGACCTTATCTTCACAC
TGAGACAGATGAGTGAAAAAGCCCTGGAATATAAGAGTGAGATGCACTTA
TGTTTTTTGGATCTGGAAAAGGCATTTGACAAGGTACCCTGGAACAAGCT
CTGGGACTGCTTGGCAGGGAAAAACATCCCAGCACCCCTGATCAGTGCAA
TACAGAGTTTCTACAAAAGCTGCAGAAATTATGTAAGAACAGCAGACCAA
AAGTCAGAAGAATTTAAGACCGCCAGCGGTGTTAGACAAGGTGATATTCT
CTCACCTTACCTCTTCATTCTTATGATGGATGATGTCATCAAGACCTGTA
AGGAGAAGACAAAGAAGTACTCTGTAGGGTACTGGAAGATGAGACCAATC
TGTATATCAGAGCTGGCNTTTGCAGACGATGTGGCCCTGATAGCTAAATC
AGAGGCACACCTTCAGTCCAACTTACTTGTCTGGAAGGAAGAGCTTGAAA
AGAGAGGGATGACCATCAGTATCTCCAAAACTAAAACCATGGTGATCTCA
AGAGAGGAGAAGAAACACCAGATCATGATGGGACAGTATGCGTTGGAGCA
GGTTAACCAGTTCAAATACCTTGGAGTTGTATTAGACCGAAACGGAGGCA
TTAAGACTGAGCTGGCTACACGAAAAGCAGCTGCTGGGAGACTCTTCCAG
GCCATAAACCGAGGGTTTCTTAGCAAAAGAGAAATTGGCAAGAGGACGAA
AATGGCTGTTTACCGCTCTACCTATGTACCAGTCCTGACCTATGGGTGTG
AGTCATGGGCAATGACAACAGCTCACAGAAGCCAGCTNCAGGCCTCGGAA
ATGAGATATCTGAGAAAGGTGGTCCAAGTGACAAGAAGGGACAAAGTCCG
CAATCAGACAATACGTCAAGATCTTGATACCCAGNCCTTACAAACCCGAG
TGGATCAGTCACAGTTACGATGGTTTGGACATGTATGCAGAATGGGAGAA
AATCGGCCACCATGGCAGGCATGGGAGGCTAAGAACCAGGGAACCAGACC
TCCGGGACGACCCAGGGTGCGCTGGGAAGACAACATCCGACAGTCCCTGA
CTGACAGAGGACTGGAATGGAACAAAGCCAGAAAGAAAACTGCTGATAGA
GACGTCTGGCGATCTCTCTGGCAAACCTCTACACCCCAAGGTAGAAGAGG
AGCGACTAAGTA
>rnd-1_family-173#Unknown ( RepeatScout Family Size = 631, Final Multiple Alignment Size = 100, Localized to 1000 out of 1011 contigs )
TACAGCTGATTCTCAAGCCAGCGGAAGGCAGCAGTGACTGCCTCCACCTC
CATTCTCAAACTAGACGTTGTGATATCATATGCCAGGCTTTGTTGCACTA
AGCGACGTCCATTCGCCTTTGCTATGAA
>rnd-1_family-360#DNA/hAT-Blackjack ( RepeatScout Family Size = 178, Final Multiple Alignment Size = 100, Localized to 1000 out of 1011 contigs )
TTGGCTCTCCTGTCAAATCCGGACGAAGANTGGACGGCCTCGGACGGCTT
AGTCGGAGTTCTCTCCCTTGGCCGCACTCCAAACAGTGANCGGAAAAGTC
ACAACGAANCAAACGANACAGTGAGGTCGACATCAGGGCTGCCAATGCTN
GGTTGTTTCCCCCAGATCTGGGTTTTTATTTGACGCCTCGGGGAAATTCT
GGGTGTTTTTTTTTT
>rnd-1_family-5#SINE/tRNA ( RepeatScout Family Size = 6024, Final Multiple Alignment Size = 100, Localized to 1000 out of 1011 contigs )
GGGAGTCGCCGTGGCGTAGCGGCTAGACGCTCGCCTGCGGATCGGAAGGT
CGTGGGTTCGCTCCCTGGCGGAGCCGGACTTTTTTCAAAAATGACCTTGG
CTCCCAGGTCGACCCAGCCTTGAGTGGGTACCGGGTGCAGTCCCGGGAAG
TAAAGGCGGCCGGCGTGATGCTGACCACATCACCCACCNNGTGCCGATTG
GTCTATAAAAATATAGGTCTAGCCCTATATGCCCNATACGCCTAAAGGCG
TGGAAAAGGGTCCTTTACTT
>rnd-1_family-29#DNA/P ( RepeatScout Family Size = 3166, Final Multiple Alignment Size = 100, Localized to 1000 out of 1011 contigs )
AATTTTAATTTNAATTCACGGGAGACAGTCGTGTTGTGATGTGTGTGTCA
CTGTTTCTAGTCAGTAGTTCGGATTTTTGGGAACTGGCTGTTTATTNCTT
TTCTACTTTGAATGTAGAAATCTTACTTTTAGGGANAATACAAACAGGTA
ATTTAGAAGCCATATCTGGAGAATATCGACAGTTGTCAGGTGCAAACTAT
CTTGTGTTNGAAGAAAACTATTGCTTTCATATTGACTGTGCATAAATGGT
GCAACCACACTGTGGATAAATTGTGTCAAGATATTTCGGAGCTCTGGGTA
AGTGGATGAAAATAATATTTAATTTACTAACTAACCTCTCACAGCAAGTC
ACTCTTTGCCTCTTTACTAATTGTTGACTAACAGTATAATTATATGTTGT
AGNAGTACACTAATAATATTAATCCTTAACCATTTGCTTTGCTTCGCGAA
CACTGGCTGTAAACTCTTGCGGAAACTTCTGGTNGTTCATCNACTTCTTT
TGCATATTTGCAGTTGTACGGTCTGTTAATTTTTGTAAACTGGCTTTTGC
TTTGCTTCGCGAACACTGGCTGTAAACTCTTGCGGAAACTTCTGGTNGTT
CATCNACTTCTTTTGCATATTTGCAGTTGTACGGTCTGTGTTAATTTTTG
TAAACTGGCTTTTGCTTTGCTTCGCGAACACTGGCTGTAAACTCTTGCGG
AAACTTCTGGTNGTTCATCNACTTCTTTTGCATATTTG
>rnd-1_family-348#Unknown ( RepeatScout Family Size = 193, Final Multiple Alignment Size = 100, Localized to 1000 out of 1011 contigs )
AACTTCTGATTCTGCAGCACCAGCTGGCCAGTCCCTGCACTCACGACCCA
AAGTGATTAGAACCCTAC
>rnd-1_family-295#LINE/RTE-BovB ( RepeatScout Family Size = 272, Final Multiple Alignment Size = 100, Localized to 1000 out of 1011 contigs )
TGGGGTAGGAGCCTGTCCTACTACTAGGCGCGTCCACCAGGTGGCGGATG
GTGGAAAGGCCTCTAGATATAGAGGTTAGCCACGAATATATTGAATAAGT
GGCCGTGGACCAAAACAGGTGATGGTCATTGAGAGGAGGCGAGTTAGTTG
GTGGGACAGCTAACTCTATAAAATACCTCAAAACTCTACGACATGGCCAT
CGGCGGGTAAGAGGCGCCATAACCTCTCCCCCCTGCTGCCTTGCAGGGTA
AGTCTCTTTAGACAAAGGCTATTGGAGTCAAACCATATACAAACCGGCGG
AAGGCAAGGGGAAACCACCGCTGTACTATCCCNAGAAAATCATGCCTCAA
AATAATACGTATTCAGATAACGACGTGAATGGGGATTCCGGTGGAATCAC
CTCGTCCGGTAGGGAGCATCATGTTCTACGGGTGATACCCGACCGTCATC
CAGCTACTGTAGAAAAAGTAAATGGTAGAAACATCATGAACATTGGTACA
TGGAATGTCAGAACACTCGTACAAAACGGAAAGCTGGATAACATCAAGAT
GGAAATGAAGAGAATGAACATCAACATATTAGGAATTAGTGAAATGCGAT
GGCCAGGAGCAGGGGAAAAGTATTCAGATCAGCACAGAATTATTTACTCG
GGTGGGAAGGAATATAGTAAGGGAGTTGGTATTATTTTGGATCCAAAGAA
CTCAAAAACTGTTAAAGGATTTTGGACAATATCAGATAGAGTACTATTAG
TAAAACTTCGCGGCAGACCGTTTGACATCAACTTAGTACAGATTTATGCC
CCAACAGCAGATAGTTCAGAGGAAGATATTGACGCATTTTATGACGAGTT
AGACATGGCTGTTGATCAATGCAAAAATTGTGAAGTAACAATGGTACTTG
GAGATTTCAACGCGAAAGTAGGAAGTGAAAAAGTGTACGGAATAACGGGT
GGCTATGGCCTAGGAGAAAAGAATGTGAGAGGTGACAGATTAATAGCATG
GGCTGAGTCGCGCAGCATGATAATAGGTAACACCTGGTTTAAACACCATC
CTCGAAGATTGTGGACTTGGAAAAGTCCTGGTGATAATGTCCGCAATCAG
ATTGATTATATTTTGATTTCAAGAAGATTCAGGAGCAGCTTAGTTGGAGC
AAAAACTAGACCAGGAGCAGACTGCTTTAGTGACCATGTTCCAGTTGTAG
GAAAAATTAGAATAAAACTAAAGAACATTAGAAAAACACCACAGAACATC
AAGTTAAATTTAGGAATTCTTAGAACGGATAAAGAAATTAAGGAACAGTA
CAATGTCACTGTACAAAACCGGTATAATGCAATGGAAATTATACAGACTA
TTGATGAACAGTGGGATATGTTGCGTGAGTCAATTCAGCAGACATCAAAA
GAGACAATCCCACCAACCCATAGAGTTGCAAAAAAGAAATGGATGTCAAC
CGAAATTCTGCAGTTGATGGATGAAAGAAGGAAGAAAAAGAATGATAAAG
AAGAATACTCTAGAATACAAAAAGAAATAGTGAACAAATGCAAAGTGGCT
AAAGAAGCCTGGCTGAATCAAATGTGTACAGAGATTGGGGAAAATCACGG
GAAAGACTCACATTCCATGTACCAACAGATAAATATGTTAACAGGAAAGA
TGACACGTAACAGCACTGGATGTTTGAAATCAAAAGATGGTGACTTATTA
ATGGGACATAGTAATATAATTAACAGATGGACAGAGTATATAGGGGAATT
GTATGATGATAATAGACCAGACGTAGAACTGCAGACCAACAATGATGGTC
CACCAATAATGACTGCAGAAGTTGAGGATGCAATACATCATATGAAGAAA
GGAAAAGCACCCGGGCCAGACAACATCTCACTGGAAGAAATCGAAGCACT
GGGAGATTTTGGAATTGAAATAATAACTAAACTTTTAAATGATATTTATA
ATAGTGGGTATATTCCAAATGACCTTTTAAAATCCATATTTATAGCTCTG
CCNAAGAAACCAGGCACTTTAAAATGTGAAGACCATCGCACAATAAGTCT
TATGAGTCACATGACTAAGATTTTACTGAGAATAATTATGAGAAGAATAA
GAAACAAAATTAAACCAGAAAT
>rnd-1_family-108#LINE/RTE-BovB ( RepeatScout Family Size = 1084, Final Multiple Alignment Size = 100, Localized to 1000 out of 1011 contigs )
TTGATAGAGTATCAACTTTCAGAAGCACAGATGGGCTTTCGACGAAACAG
AAGTTGCACAGATGCCATTTATACATTGAGACAACTATCAGAGAGGGCAA
TAGAACATGATAAGACATGTTTGTTGACATTCATAGACCAAGAAAAAGCC
TTCGATAGAGTCGACAGGAATATGTTGTGGGAATGTATGGGGAAAAAAGG
AATCAGCAATCATCTCATTAATATTTGCAAAAGCCTGTACACACGTAGTA
AATGCTGCATAAGATCGAAGGCAGGGTTGTCAAGAACTTTTATAGTGAAC
TCTGGTGTGCGTCAGGGCTGTGTACTATCGCCGCTTCTTTTTATAACATA
CATGGATACCATATGTAGCGAAACGAACTTTAATCATGAAGAAGATATTA
CAGAATTACTNTTCGCCGACGACCAGGTACTCATAAGCAGAAAGTACGGA
ATGCCTACAGAACCACCTAAATCAAATTAGTAACAAAGGGGAGGAATATA
ATATGAAAATAAACACTACGAAGACAGAGACAATGGTGATAGGAAGACAG
AAAGACAATTTAGAAATNAAATTAAAAAACAACACCCTGAGACAAACAGA
GGAATTTAAGTATTTGGGAGCAATTTTCACATCCGACGGAAAACTGGACA
GAGAAATTAGCTCGAGATGTGCCAAAGCTAATCAAGTAATGGGGCAACTA
TCTCCCCTGTTGACACACAAGCAGATACCCCGGAGTACTAAAGTGAATCT
TATCAGAACTATTTTTTGGCCAACACTATGCTATCAGTGCCAAACGTGGA
CACTTACATCCTCCAATGAACGTAAAATTGTGACAACAGAGATGAAATGC
CTTAGAAGAGCTGCAGGAGTTTCAAGGAAAGACAGAATACGAAATCACGA
AATCAGACGAATGCTAGGAATAAAGCCAGTCTTACAGGTCATCAAAGAAC
AACAAATGAAGTGGTTTGGACACCTAACAAGAATGCCCTGGTACTATCCG
CCACAGCGAGCCACACTAAAACGTTACAACGGGTATAGAGCGAGTGGAAG
ACCTCGGAAAATATGGAGTGATGGCATTAAGAACAGCCTTACAGAAATGA
ACATCAGTCTTAATAGTGCTCTTGACAGAGCTCATCAACGAACGTTACAT
CTCCCCCCGACACTTCGATGAGGTACAAGGTGGAAGAGAAGAAGAAGAAG
AAGAAGAAGA
>rnd-1_family-30#SINE/tRNA ( RepeatScout Family Size = 3067, Final Multiple Alignment Size = 100, Localized to 1000 out of 1011 contigs )
TCGCCGCGGATCGGAAGGTCGTGGGTTCGNTCCCTGGCGGAGCCGGACTT
TTTTCAAAAATGACCTTGGCTCCCAGGTCGACCCAGCCTTGAGTGGGTAC
CGGGTGCAGTCCTGGGAAGTAAAGGCGGCCGGCGTGATGCTGACCACATC
ACCCACCNAGTGCCGATTGGTCTATAAAAATATAGGTCTAGCCCTATATG
CCCNATACGCCTAAAGGCGTGGAAAAGGGTCCTTTACTTT
>rnd-1_family-337#Unknown ( RepeatScout Family Size = 207, Final Multiple Alignment Size = 100, Localized to 1000 out of 1011 contigs )
TATTGACACAGTGAGCGGAAAGTGTTGGCAGAAGAATTGACAAAGTCGGA
TTTTATTGTGATGACAGGTGAAGTAGACCGGAGGTGTGACTTGGCCTATT
AGCTCTGACCAGCTTAATTGAACCAGGAGATCCTAGCGTGGGAATTCAAA
CAAGTGTTGTACAGCCCTGACTGACAGCGAATAAACTTACCCACAGGGGA
GGAGCTGTGACATCCTTGAATGAGAATGATTTTAGGCGTAATGTAGGAGG
AGCTTGATAAAAGTTATAAAGGGGTGAACTCTAGGTCTGGTAAATGAGAC
CCTGTCNAGCACATGCCATCTGTTGGGCTTAACCTAAGCTTGAGACAGAA
CTTTTGGCATCGTGGTTTCATTTTTCCAGGTAAGATCGAAATTAGGTTCA
AATCTATATTTTATGATAGAGATCTAACTGTCTTTTTGCTCAAGTGTGTG
TCTTCATCACTTTGTAGTACTCCTAGGCGGACATTTCTTCATTCTCGTAG
GGCACTGTCACATTGCTTTATNTCCTATTTGATAGTGTCATGAATGTTTT
TTCGTGCACATGTGTTTCAATGTTGTAAAACCTAAATGTTGTTGTTGCCA
TTGAAATTTAATGAACTATCATGTTTTTGAAATCACAAGCGTGAAGATAA
CTTTGGCAATCTTTTCACGTGTGGTTAATGTGAATCTGTATTACATACAG
CTAACACACTGAAATGTGTTTAACTCTCGGGAGGCTAATGCGGAGATTGA
TCCCGGAGAGTAAATCCACGAGATTTGTTATTTGATTCGCCCCAGAANTA
TTGTTAGCATTCTGGGCGCGTCGATTGTTCCAAGCATAGATTCCAGAACT
GGTTCTGTCTGACTGATTGTCATTTTGAGTCTGTACGAGAGATGGCACCT
GACGTAGAAGACTTGACTATCATTACAGGACGTGTAGAGGAAGGCAGAAG
ATGTAACAGTTGGAATGTGAGACATAAGCCCTTCCAAATTGGACAGGAGT
GAATGTGAGCATGAGGGAGAGATGAAATGTTTTATTTAAATAAACATGCT
TGATGTTAGTATAATATACATGCTTAGTGTACATCTAGAGCAGATACTAC
AAATATGCGCTTGTTTCTTCATTCTCCAGTTCCCACATTGGGCAGGGACT
AGTAGGCATCCATTATTTGCCGACCGTCGAGTGTAACGACCTGCAGAAAG
CAGTGAGGACGACAAACTGGAAAAGATAGGCAGGGTCTCAAGCCGAGAAC
TGTCCTGACGAGCTAAGTTATGTACAATCTTTAATGTCATCANTAACATC
ATCCCAACTCTACTAGCCTAAACAAGTTCATTTTATTTTAGTTTCGATTT
ATTAAATAAATCTTTTTGATGTTGTTACAACATAGTTGAGTAAATTGTGT
ACTTAGGTTCAAGTGTCTTTGTGCATATTAGTTTACTTCAGCTAACAAAT
ATTTAAATCACTTGATGGGGGCTTTTAAGTAATGCCAGGAGAGGAGANCA
GTCGGAGGGGTTAACTGNGCACCTGGATNATATCACAGTGGGTNTATCCN
GATATCTATCTATCCCTTCTCCTACTCCTGTGGATACAAGTACAGCAACT
TTCATTTCATGGAACGAGCCACTCGCTGTTTTCTTGGCTATCCAGGACTG
TCTAGGATCAACATAGCTTAGATAATAGTCCAGTTTCTCACGTGGGTGGG
CATTGTTAAGGTTCAAACCCACACCCTCACTATATCAGTGTATTTACCCA
CGTGGGCGCGCGACA
>rnd-1_family-309#LINE/RTE-BovB ( RepeatScout Family Size = 250, Final Multiple Alignment Size = 100, Localized to 1000 out of 1011 contigs )
CAAACGAAGAGGTTCGCCATANAATTATACAGCACATTGGCAACTATGAA
CCTCTTTTAACTACAGTGAAAAGGCGAAAAATGCAATGGTACGGACATGT
AATAAGATCTAACGGCCTCTCAAAAACAATACTGCAGGGCTCAGTAGAGG
AGAAGAGGCAGACCAAGAAAGACCTGGTTACAGAACCTGACTGACTGGAC
AGGCCTCAGGCATGCAACCATGAAGTCCATCGCANCTGACCGCCAAAGGT
GGAGAGAGCTGATCAGACAGTCAACAGAAACTGGTGACCCAACGACACGC
AGTGTTACGGGATGATGATGATGATGA
>rnd-1_family-288#Unknown ( RepeatScout Family Size = 287, Final Multiple Alignment Size = 100, Localized to 1000 out of 1011 contigs )
TATTCAAAGCAATGTTTCCCCGTTGTGAATTTAAATAATGCGGACACAAA
CAATACATTGCACAATTTATTGCCNGGCATATTT
>rnd-1_family-366#Unknown ( RepeatScout Family Size = 175, Final Multiple Alignment Size = 100, Localized to 1000 out of 1011 contigs )
AAAAAAAAAAATCGACCACGTTCAACCTACTGCGAGCAGTATCGGTTATA
ATTGTGGTCTGGTTTCTTTGCGCCANTTNCGTTGGCTAAGAAATGTTAAT
TGCGCCAAAACTAGTGGCTTGGACCGGTACTCTAGTACCTAGTGAGGGTT
GTTG
>rnd-1_family-38#Unknown ( RepeatScout Family Size = 2581, Final Multiple Alignment Size = 100, Localized to 1000 out of 1011 contigs )
GCCTGAGAGGCAAGGAACCAACAGTCTGCATACAAATAAGCCAGATCTGT
AAAA
>rnd-1_family-51#RC/Helitron ( RepeatScout Family Size = 2265, Final Multiple Alignment Size = 100, Localized to 1000 out of 1011 contigs )
ACCAGTACTACTGCTACCACTACCACCACCACCGTCACAACAACAACAAA
AACNGTCACTACTGTCTGTGCAGGTCGGTGTAGCCAGAGGAGTTAGCGCC
GCATGCTGTCGCCACGGACTGTTTAGTTTAATTGTGCCCCGACATAGAAA
AAAAAAAAACTCCATCACCTAACCAGTGATGGAACCCACAGTAATATTCC
GTGATAAAAAAAGTACACTATACTCACAAATAGCGGAGANAAATAACCCG
CACCCGTCATCTCTCCCTCTCCGAAGGGACGATTTTTAACTGACCTTGGC
ATCCGTGTCCACCCAAACTAAACTGGACCGTAAGCCGTCTTAGTTAACAG
TTTCTGTCATCGACGAATAGTTTTTGATCGAGTGAAGCGTCGCGGGGAGG
CTAATTGGGACTTTACTGAAATCGGATGTCTTTGGGCGAAAGGCGCAGAT
ATCGCAGCCTAGCTGTAAACCACAACACAACGTGCCAACCGCCCTTTTAG
GGAAAAAAAAAATTANCACCCAGCGGGGAATCGAACACCGGTCACCCGCG
TGAAGGGCGGAATACTTACAACTATACTACCGAAGACTGAAGAGTTTAGG
TCAGATATCGCAGCCTAGCTGTAAACCACAACACAACGTGCCAACCGCCC
TCTCAAGGGCGAACGAAGATTACCCGTGACATGACCATTGAGCATCACGT
CGCCGCTATCGCAGGCTAGCTGTAAACCCCAAAACCGAAAAAGGCGTAGA
TATCGCAGCCTAGCCGTAAACCACAACACAACGTGCCAGCCGCCCAGTTA
AGGG
>rnd-1_family-243#Unknown ( RepeatScout Family Size = 385, Final Multiple Alignment Size = 100, Localized to 1000 out of 1011 contigs )
ATTACCCACCACGCCGGCATGGCCTGGAGAAAAGATCCAAAGTATGCTCA
CTACCCGTGACCTTTC
>rnd-1_family-8#Unknown ( RepeatScout Family Size = 5308, Final Multiple Alignment Size = 100, Localized to 1000 out of 1011 contigs )
CCCAAAAGCATGTCGTAAGAGTCGACTAATTGGGAGCTTCCTTCGAAGTC
GGAGTGCATCTGCCTGAGAGGCAAGGAACCAACAGTCTGCATACAAATAA
GTCAGATCTGTAAAACGGATGCGCACGCAACACTCAGGTTCTGGAACAAG
ACTGAAGTCCAGAAGTGGACGAACAACCAGAACTTTCCGCCGGAGTTTAC
AGCCGGTGAACGCGAAGAAGAA
>rnd-1_family-459#Unknown ( RepeatScout Family Size = 100, Final Multiple Alignment Size = 100, Localized to 1000 out of 1011 contigs )
TGTTGTGAAGAACAATTTGTTTATCCCCGGCAATTTTTCTTGCTTGAACT
CTTATCTGGATAAGAGGAATTTCTGATAAGAAGAACCATTTCTTGGGTCC
CGGTGAGTTCTCCTTATCAGGTCTGCACTGTATT
>rnd-1_family-419#Unknown ( RepeatScout Family Size = 126, Final Multiple Alignment Size = 100, Localized to 1000 out of 1011 contigs )
CCGGAAAAGGCGNCCGTTTTGTGGTGTTCTCTGGACAACAGGATCGTTAG
AGCTGATGTCCCAAGCCT
>rnd-1_family-170#Unknown ( RepeatScout Family Size = 646, Final Multiple Alignment Size = 100, Localized to 1000 out of 1011 contigs )
CTGTTCTNTTGCACTGTCCATTTGATCCCAGAGAGCCTTCACCACGTCCG
CTTTATCATAAAGTAGCTCACCGCCCAGAGGAGCGGCAGCAGCCAATCTA
TCAGCCTGCTCGTTACC
>rnd-1_family-452#Unknown ( RepeatScout Family Size = 104, Final Multiple Alignment Size = 100, Localized to 1000 out of 1011 contigs )
TTGGTGTGACAAAAATGAAGAAGAAACGCTTGTTTGGTGTGACAAAAATG
A
>rnd-1_family-210#LINE/RTE-BovB ( RepeatScout Family Size = 488, Final Multiple Alignment Size = 100, Localized to 1000 out of 1011 contigs )
TCTTTCCAGTTGGTGACACCAAGTGTTTGCAGGTCTGTCTGGATATTATC
TCTCCATCGTCTTCTTGGTCTGCCT
>rnd-1_family-323#Unknown ( RepeatScout Family Size = 227, Final Multiple Alignment Size = 100, Localized to 1000 out of 1011 contigs )
ATATATATATATATGTGAGAGAGAGATGGGATGTATGTCTACAAGTGCAG
AGGTGGGCGAGGAGAGTTGATGTTCTATGTTTGATAGAGTCTATCTGTCT
CCACTCTGGNACTCGTCTCCTGTCCCTGTTACTGACTGAACAACAGAGAT
GATATTTAGAGACTTATACTGTCTCATTATCCTGAGAGCTGTCCTCTGAA
TGATTACTAATGTGGATGTTAATAAACTGAGCTTGACATGTAACCCCTGA
GATGACTGCTAATTCTGAGTTCCTTCTTGATACAGGATGATATCTCCTTG
GAGGCCAGGCAGTGAATCAGCAGTCCACAAAACCACCTACAAGGAAGTCA
CCAATGTCCAAGCCAGTGGTGGGCATCAGATTGTAAACCAAACTTTTGTC
ATCNATTAGNGAAATCCTCCAGTTGGTCTACGGACAACATTATGGGTGTT
GTACCTTCACCATCATTTATCCGGNAGCTTGTTTGTGCCTCAAGTGATTG
ACTTGGTACCCGAGATCCTCTCCAGGAGCTTGGGTGTATCTCCAGTGTTC
GAGTGTCTAGTGTGGGACTGTCTTCAACGTAACAACACAGTGACTGAACA
TCCAGCCAGTTCAAGAAACCAGGGATTCAGATAAGTGTGGTCAATCATTG
GTTTATTGCCGGGCTTCACTGTTAATCGTCCACATGATCATGATGATGAT
CTAGGCGGACTCTGGGAATCTCTTACACGTTCAGTCAGATCTGTTTTGAA
GTTTTGGTCCTTCCTATCACTCTGGGTTCTTGAAGTTCTTTGCTGATTCT
TATATAATGTATGTGTTGCACTTATTACATGCATTCAGAAATTTTCATGG
CTGACTTGGGTGTCCCTNTTTCACCGTTCTAACTGTCTAGCNTTTATGTN
TGTGTGATTAATAANTNTAATCTGTGTTAACATGGCTATGATAGTANACT
ATCATAACCTGGGGGCTATCTTTTTATAGTAGTGGGGGTGTCCAGCCAAG
TTGTGCCTAGGAATATTATATATTTTGTAGTGCCAAAACTTGAGTTGCCC
TACTCCTGAAATAAGTTGAGCGTATATTGGCCACGGGGTATCCCTTAGAC
CAATACGAGCCGACGACTCAACATNATTATTTCAGAGTGCTGTTGGTTCT
TAAGGAGAAATCCTTAAATCAGGCACGCGACAGGAGCGGTATGTGACA
>rnd-1_family-50#Unknown ( RepeatScout Family Size = 2313, Final Multiple Alignment Size = 100, Localized to 1000 out of 1011 contigs )
GTGGCGCGGTGATTTATGTCACAGGCGTGAGGGGAAGTTAAGTCCAACAT
GATGTGTATAAGGAGATACTCCGTACGTCACTCGGGCGCCAGTCCTTCAC
TATCCTGGTTGTACGGAACCTCACGCAAGACCCCTGCAGCACGTCCTCGT
CGTGCGCCACGGATAATGTCTCAAATGAGCATTAACAGAGCTGTCAGGGG
ATCTCGGAGTTCGGCGGCCCCCAGAGGTGATGTGTCCTTGTGGCTCTCAT
CAGCCCGCCCCCAAACGCTTGGGTGAAAAAATGTTATCAAAACTCATTAG
GAACATGAGTAGGTTTGCCAAACGTACAGCCAAAATTACAACCCTTGGTT
AAAAGACTGCGGAGTAAAGAGAACATTGTTCACTGCACATCCTCTGTTAA
CCCTCAGTGTCGTCGTCACCGCGCTGAGGTACACCACAACAGCAACCATC
CATAGGCTGGCCATCCNTGTACATCCTCGGTTAACCCTCAGTGTCGTCGT
CACCGCGCTGAGGTACACCACAACAGCAACCATCCATAGGCTGGCCATCC
ATGTACATCCTCGGTTAACCCTCAGTGTCGTCGTCACCGCGCTGAGGTAC
ACCACAACAGCAACCATCCATAGGCTGGCCATTCACGTACATCCTCGGTT
AACCCTCAGTGTCGTCGTCACCGCGCTGAGGTACACCACGACAGCAACCA
TCCATCGGATGGCTAAGCCTAAATGTCCGACAAAACTAGATCATACGGAT
CAAAATCCGACCATCAAAATTCGTATTGAACTGAAAAAGNCCGAATGTCC
ACACCCAAAGACCCCACTCGCCCGAGTGTTGGGACAAAACTGATAACGAT
ATGCCTGACGCAGGATGTNAAATTCTGTCGGGCTAACGGCTCGTCAAAGA
AATCTAACGTGCGAAGAAAAAAGAATGTACCTATCTGTGTGGTCACAAAA
GTCCAAAACCCGCGGGCTGCTCCCCGCTGACTTCCGGAGGGCGCAGCCCC
TGTCGAGCGGGAGGCCTGATACGGTTGTGAGGTTAAGCAGGCATGTGCAG
GACGTGACGATTCCTTGGGTGAGCCCAGAACCAGAGCGCCATGTGCCGGC
TCTGCATGCATGGAAGCCTCCTTGGATGGCGGGGAATGCCCATGATCTGC
CCCTGCCTTCCCTTGAGGGCTAACCGTTCCACAGGGGGCTGCCCCAAAGG
GGTACTCCGGGGGCAATACCTGCGGCGAAGGAGACAAAGTGGACACCACA
CAAATCAGGCAACGTCTCGACCCACACAAAACAATGGCCACAGTCANCCT
AGAAATAGGCCTGACGTCTTCCTTCGAAGTCGGAGTACAGCTGCCCATGA
GGCAGGGAAATGAAAAACGGTTGTACACGCAAAAATCAGGTCCAGGTGAA
AGCCAAAAGTCCAAGCGGACGATTAACCGGGACCTTCCGCCGGAATTCAC
AGCCGGTGATCGATGAAAAAAAAAAAAAAAAAAA
>rnd-1_family-388#Unknown ( RepeatScout Family Size = 153, Final Multiple Alignment Size = 100, Localized to 1000 out of 1011 contigs )
CTAGACATGGTGGCGNCGAGAGGTCGGAGTTTCACACGTCAGTGAAATTC
TCGGGAGAACAGGTGTTTGGCAATTAGGAATGTTTGATCTTGGTCGAGGT
CGTACTGTAGGCCGTTCACTGTGAGTGACAGGCCACTTGTTAGCTAATTT
GATCTGATAGGTACCTCAGAGGCGNGGCTTAAGTCATCNTCTTGAGGGTT
GGGTAGAACCTAAGNAAAGGGAGGAGTTTAATTTGGACAATAGATTGATA
CTTATACTTCGAGCCTGTGGAATTCCCGTCATTAATCGCAGCCTGCCGGC
AAACAACACAGGTCGACGTAAAGGTAATTTTACGGTCGGATTCTGGTTTG
GCGATTGCTGGAAAGTTCCCAGGTAAGAGTAAATATTAATTTTAATCTTG
TATACATAGGTTAGGGAGTTAAGCTTAGTCTATNCTACCTTTTCCTAATT
TGTCTGCACATTCTGCTTGAAATAGTTCTTTGTGAGTATTCAGTATCTCA
GTTAGGGAACTGCTAAACTATTCCTATTTCTTGTATGTTTGTGTCACATG
TTTTTCAGTGTATGTTTTCATGTGTATAAAATAAGACGTGAACAATGACA
TTTGCTATAATGAAATGTAATTATATTGTTTCNACGATCAACCAAAACAT
GAGTTTGGACTGTGGGAAATGATGCCCATATGTGCAGGGATGCTGTTACG
TTTTGTGTGCCCACCATGTGCTCACTTAATGTGTTCACCTAAACAGGGGA
TTTATAACCCCAGGGGAAGAATGATGGGTGTATAGNATTCACTGTCACTG
AAAGATAATATTCAGGACAGCGTGCACGTATAAAATGTTTGCGTNTTCAG
CACATAACCTGCGCCACGTGTTTATGTCAAATCAATGTCAGCCAGTTGGA
AGTCTGAGTGATGACGGACAACAGACTTAGAAAGTCAACTATCATGACAT
AGCATGAGAGGGAAGGCAGGATATGTGACGTCNATGTGAGACAAAAGACC
TTCAGACTAGACTGGAGAGAATGTGGAATATGAGGAGGAGTGATGGGATA
TATTTTATTATTATATGTTGTATTAATTGATACATGTATTCTTAGTGTAA
GTCAAGATACTACACGTATGTGTTTGTTTCCATGATTACAGCGCCCATGT
GACGATCAGTCCATGAAGGAGACTACATTGTGTTAGACTCGGCCAGCTGG
GAACGAGGTGGAGAACGAGGTGGAGAACGAGGTGGAGAACCAGGCGGGGA
AGAAGCTGGA
>rnd-1_family-65#Unknown ( RepeatScout Family Size = 1800, Final Multiple Alignment Size = 100, Localized to 1000 out of 1011 contigs )
TCCCCGTGTGGGTTCCGGGGCCCCATTGTGGGGAAAACAAGAATAGACCC
ACTGCCTCCCC
>rnd-1_family-200#LINE ( RepeatScout Family Size = 506, Final Multiple Alignment Size = 100, Localized to 1000 out of 1011 contigs )
ATTATTCTACGCCTTAGAACAGGACACAATCGACTTCGCAGCCACATGTA
CACAAAATTTAAGATCGGCGAATCAGCCATGTGCACATGTGGACTGGCAC
CTGAGACAACAGATCACGTCCTCCAAGACTGTCCCAAATACAACGTATCA
AGGCAAAACTTTTGGCCAAGAGAAACACCGGTGCAAGTCAAACTTTACGG
GTCGCTGAGTGAATTACAAAAGACAGTGAAGTTCATACTAGAGACAACAT
TGCAGATATAGATAATCTATTTCAAGCGAACGAAAGAAGAAGAAGAA
>rnd-1_family-196#Unknown ( RepeatScout Family Size = 515, Final Multiple Alignment Size = 100, Localized to 1000 out of 1011 contigs )
TGTANACAGAAAGANATGGTTCTNACCTTGCGGCTGCCCTGGTAAAACAG
GCAGTTACGTTTGATCGTNGTCGAATTTGTACTTCAGTTATAAAGGATTC
ACTTATTTGCTTCATTTATGTAATTGTTACTGTAGTATGCACCTGACGAG
ATACAGCGAAATATGCCAGGCAATAAATTGTGCAATCTATTGTTTGTGTC
TTCTTTGTTCAAAT
>rnd-1_family-330#Unknown ( RepeatScout Family Size = 211, Final Multiple Alignment Size = 100, Localized to 1000 out of 1011 contigs )
TGGCTGGCAGTGCGACTATCAGGAATGGGCCNTCTATGGACAGGAGAGAC
ATCATCAATGCCATACGAGAGACTAAACGCTGTGAGGCTTTCAGTTTCGT
GGAAAATGATTTTTCACTGAATAGACTGCATACCCTGGGTGTACCAATTG
GAGCNGCGAGACAGGAAAACCATGCGGGAGCCACCCGTCGTTACATCAGC
CAGAACAGAATGGGAGTTGTTAGCCTAAAAACACTTGGAGACATACTCAG
GAGGAGATCGGAGCACTTATGGTCATGTCCGA
>rnd-1_family-206#Unknown ( RepeatScout Family Size = 497, Final Multiple Alignment Size = 100, Localized to 1000 out of 1011 contigs )
GGCTATCCTCCGAATAACGGTCCCAAATTATCGAGGCCGAAAATATACCC
TAACAGGGCCTCAGTCACATGTAAATTGCGGACTTCCGGCGACT
>rnd-1_family-389#Unknown ( RepeatScout Family Size = 153, Final Multiple Alignment Size = 100, Localized to 1000 out of 1011 contigs )
TAAATACAACACAAAATGTGACTAGAAAGCTCAACGGAGGGAATGGAAAA
GACGCGCACAAATACAACCGAACGTTTCGACCAAAGTCTTTATCAACGGA
GTACTAAATA
>rnd-1_family-314#Unknown ( RepeatScout Family Size = 244, Final Multiple Alignment Size = 100, Localized to 1000 out of 1011 contigs )
TAGAACTGGCCCTAACCCCAACCCCCCTACCCCACAGCCTCAGCCTACGT
CCCACGAGAGAGTGCAGCCTACGTCCCGTGGTTTCAGAACTGTTAACATT
TTGCGG
>rnd-1_family-315#RC/Helitron ( RepeatScout Family Size = 244, Final Multiple Alignment Size = 100, Localized to 1000 out of 1011 contigs )
GACGGACATCCTAATTTATATTCTACTGATGTTTTAGGCCGTCTGTACAC
TGTTCATCCCAAAAATGCAGATTGCTTTTACTTGCGATTACTTTTAATCA
ACAAACGGGGACCGACATCCTTCCAGGACTTGAGAACAGTTTATGGTAAA
GTATGCGCTACTTACCGTGAAGCTTGCCAAGAATTAAATCTTCTTGAAAA
TGATGCACATTGGGACACTTCACTCGCTGATGCTTCGAATACTGCTCGAC
CACAGCAAATACGCACATTATTTGCAATAATATTAACAACTTGCTTCCCA
TCCANTCCAAAAGAGCTTTGGGAAAAATACAAAGACTACATGAGTGAAGA
CATCGCTGGCGTGAAACGAAGCANGATCAGGACCTTCAATTCACACCAAA
TGTATATAATGAGGCATTNGTTTGCATTGAGGACATATGTTTGGCAATAA
CTAACAAAGCACTGGTTCAGGTGGGACTGGCTCCACCAGAACAATCTGCA
AACAACCTTTTCGATCGTGAGTTGCCATGAATCCGAACATCCAAGACAAA
TTACCAGGCGGNGTGACAACGTATAAGTCTATCGATACTGTAATGAATCA
GGACGAAGTTGTCAATTATCCAACTGAGTTCTTGAATTCACTTGATTTGC
CAGGCATGCCACCCCACGTTTTAACCTTGAAAATTGGCGTGCCTATCATT
CTTCTCAGAAACATCAATCCGCCACGTCTTTGCAATGGTACCAGGCTTTC
AGTGAAAAGGCTGATGCCCAATATCATCGAAGGTACAATTTTAAATGGGA
AATTTAAGGGCGAGAATATACTNTTGCCACGCATCCCAATGATTCCAACA
GACATGCCATTTGACTTCAGACGCTTGCAGTTTCCGGTGCGACTCGCCTT
TGCAATGACCATAAACAAATCACAGGGACAATCGCTACAAGTGTGTGGAC
TACGTTTGGAACATCCATGCTTTTCACATGGACAGCTATATGTGGCCTGT
TCACGCGTCGGAAAACCTTCTGATTTATTTGTGTACGCGCCAGACGGAAG
AACAAAGAACATTGTTTACCCGAAAGCACTTCAGTAAACACATTTTTAAT
GTTAAATTACCGGCACAATGATCCAATATAATTACATTTTGTTAAAGCGA
TTTTCCTTTCAATTCANTTTCTATTGTAGCAACGCGTGCAGGGTTGTTTA
CCATAGCACGTTCATTTCGTAATTATGGTGTATTTTTCCTGTTTTCGTTG
CTTTTCACTAGGGTTTTTTTTCCAACTACTTCGATGAGGGAAAGAGTAGT
CGGTGAATTGGGGGGGGGGGGGGGGGGACAAACTGTTAACTGAGAGAGCT
TTAAGTCACAGTAACTGCCTTACCCACTCAAAGTAGCAGCAGCAGTAGTA
GTTGTGGTTGGGCTGTTACACCGTACATCGCTAGCGTGAAGCGAAGACAC
ATTTCTATGTTCTCTATTTTCCATTTAGCCAAACTACGCCACAGCAACGC
GTGGCCGGGTACAGCTAGT
>rnd-1_family-248#Unknown ( RepeatScout Family Size = 374, Final Multiple Alignment Size = 100, Localized to 1000 out of 1011 contigs )
GGCTATCCTCCGAATAACGGNCGGCAAAGATGGCGGCCGCAAAATATCCT
NNCGAGCCNCAGTCACGTGTCAATTGCGCACTNGCGGTCACGAGCACATC
GCGGCAAAACTAGGATTACTGTCCGTTGACAATTTCGAGAAACGCAACA
>rnd-1_family-100#Unknown ( RepeatScout Family Size = 1185, Final Multiple Alignment Size = 100, Localized to 1000 out of 1011 contigs )
AAAGGTTAAAGTCGAGAGGATCGACTTCATTGCACCGGGTTTTATCCCAT
ATGGCTCGGTCTCTCTCCGCAGAACGGCTAGCCGCCTGCCGAGAGCGTCG
CACAGAGCACGAACTCCGTAGCTCCGGCGACGATCCCCAGGGATCTCCGT
AAAAATTGCACTCGTGAACTGAACGGCGCAGCCGTGAAACGAACCCACGA
CCTTCAGAGCGCGAGGCAAACGGCTTGACCACTTCGCCACGGAGACC
>rnd-1_family-372#LINE/RTE-BovB ( RepeatScout Family Size = 169, Final Multiple Alignment Size = 100, Localized to 1000 out of 1011 contigs )
AGAGACCCTGCGTAGAACCATCATCAGGGAAGGCTCAACCATGGGCCTAA
TGAACATCCAAGACCTAAAACAGGTGGCAACGAACCGCCAGACAT
>rnd-1_family-45#LINE/RTE-BovB ( RepeatScout Family Size = 2462, Final Multiple Alignment Size = 100, Localized to 1000 out of 1011 contigs )
AGAAAGAGAATTCTTAAAAGCTATATAAATCCTATCTTGATATACGGAAG
TGAATCATGGACAGTTGGTAAATTAGTGAAAACTTATTTGGAAGCTGCGG
AGATGTGGTTTTATAGACGAATGATGAGAATACCCTGGACAGATAAAAAG
AGTAATGAAGACGTCTTGAAAGAAACTGACTCACGAAGAGAACTGATTGC
CCACATCAGAAAGAGACAATCTACATTCTTTGGTCATGTGATGAGAAGGA
GAAAACTGGAGTACATCGTGACGGTAGGAAAGTTGGAGGGGAGGAGAGGC
AGAGGGAGACCGAGAGAANAGATGCTGGACAGTTTGACATCATGGCATGG
AGGATCATCTGTGTCAGAGTTGATTGAAAGTACACGAGACAGAAGGTTGT
GGATAGACATGACTACCAACGCCACACGGCATGGACTTTAAGAAGAA
>rnd-1_family-143#LINE/RTE-BovB ( RepeatScout Family Size = 849, Final Multiple Alignment Size = 100, Localized to 1000 out of 1011 contigs )
AAGAAAGAGAATAGGGGCTTTTGAGCTGAAATGCTATAGAAAGATTCTCA
GAATACCNTGGACAAAGAAGAGGAGAAACATCGACATCCTAAANGATCTG
AACATCAAGGAAGATTGGCTNATAAACA
>rnd-1_family-215#Unknown ( RepeatScout Family Size = 467, Final Multiple Alignment Size = 100, Localized to 1000 out of 1011 contigs )
TATTATTATTANCTATGAAACGATGTACGAATGAAACGNTGTATGAAAGG
AGCGGAGTGGAAGGGCAGAATGTTAGACGGGCCTGCGTGCCCAATTCTTA
ACCCTTTGAAAA
>rnd-1_family-287#LINE/I ( RepeatScout Family Size = 288, Final Multiple Alignment Size = 100, Localized to 1000 out of 1011 contigs )
AACTGTTCCCGTAGCACACTGATTATACACACGTCGTTCTCTTCCTCTCA
TNCGTCCCTCCTTGCCGGATCCACACCTAATTCCTCGTTCACACATTCTT
GCACATGTTATTTCATCTAATCTCGTGTCTTCTGTCAACATTCGTTCATA
TATGGTCTTCAGAATGTCTCCCTTGTCCAGTACGAGTGTTCCCGTAGCTN
TCGCTTTTGTAGCCAGAAAATCCGCTCTTTCATTCCCTCGCACTCCTGCA
TATCCCGGACAGTATATCCACGTGATTCCCTGCAATGTTGGCGTACTGAT
GCNTGGTATCCACTCATGCCACATTNGTCCATTTTGAACCTTCCGCAGTG
CCGACTGAGAATCAGACACAATAATTCCTCTGGTAACTTTGTTTTCTGCT
ATCCANTTCAGAGCTGCAGTGATTGCCTCCACCTCCATCCTCATGCTTGA
AGTTGTAGATAAAAAAGCTCCGTTTTGTTCTGCCACGATCTTTCCCTTCA
TTCTAGCT
>rnd-1_family-218#Unknown ( RepeatScout Family Size = 459, Final Multiple Alignment Size = 100, Localized to 1000 out of 1011 contigs )
GATTATCTTCACAGCACTCCGGACACGTCCATAGGCGCTCAGATTCCCCT
CTCAACATATTCATCAGCGTC
>rnd-1_family-53#LINE/RTE-BovB ( RepeatScout Family Size = 2128, Final Multiple Alignment Size = 100, Localized to 1000 out of 1011 contigs )
GTTTTGAAAGAGGCGGGAGCCCGAAGACAACTAATCACAGACATCAGAAG
GAGACAGTCATCATTTTTCGGCCATGTTATGAGAAGAGGGAAAATGGAAC
ATGTGGTGACCACTGGAAAGATCTGTGGAAGGAGGGATAGAGGAAGACAA
CGAGAGAAGATTCTTGACAGTCTTGTTGCATGGCATGGAGGTGTGTCAGC
ACACGAACTGATACATGCTGCAGGAGATCGCAGATTGTGGCGAGGCATAA
TCGCCCACGCCAGTCGGCAAGGCACCTGATGATGATGATACACTATTCGT
ATTCGTATTCGGCCGAATAGTTGGTCCCGCTATTCGTATTCGGCCGAATA
GTGAAAATCACTATTCGGTACAGCCC
>rnd-1_family-216#LINE/RTE-BovB ( RepeatScout Family Size = 467, Final Multiple Alignment Size = 100, Localized to 1000 out of 1011 contigs )
TTTGAAGCATCGGGTGCGAGCCTTGGTATGTGCTACGTAGATGCTGGTAT
TTACGGCCTCGGATATTCCATCTATCCATCGCTTGCGTGGTCGACCTCTA
GNTCTGCTTCCATTATGTCTAAGTGACACAGGGCTCTCTGTGGTGCCACT
ATCTGGTGGTAGTCTTGACACATGTCCGAACCATTTGATCTGTTGTCTCT
TGATGTAGTTTAGTACTGGTT
>rnd-1_family-413#Unknown ( RepeatScout Family Size = 130, Final Multiple Alignment Size = 100, Localized to 1000 out of 1011 contigs )
TAGCACATACCAAGGCTCGCACCCGATGCCTCTTCAAAACCTGACGCTGA
AAGGCAGAACAGGACTAGAGAAGAAGAAG
>rnd-1_family-408#LINE/RTE-BovB ( RepeatScout Family Size = 134, Final Multiple Alignment Size = 100, Localized to 1000 out of 1011 contigs )
AAACTAGAAGAAGTTGAAACCTTTAAATATCTCGGCTCCCACATATGTAA
CGATGGCAGCTGTACCAAAGAGATCAAGACAAGACTTGATATGGCAACAG
CCGCGATGTCCCAGCTGAATACGATGTGGAAGAGCAAAATCAGCATCGCA
GTAAGGTCAATATTTACAAATCACTGGTATTGTCTATTTTCTTATACGGA
TGTGAGAGTTGGACTCTCACTGCGGAAACGGAAAGAGGATTCAGGCTTTC
GAATGTAAATGCTACAGACGCATTTTACGAATTAGTTATTTAGAACACAA
AACTAATAAATATGTCAGAGACAAAA
>rnd-1_family-409#LINE/RTE-BovB ( RepeatScout Family Size = 134, Final Multiple Alignment Size = 100, Localized to 1000 out of 1011 contigs )
TTAAAGTAACAGATCAATTTACTTATTTAGGTAGTAATTTTGATAGTCAA
GGAAATACAAAGAAAGAAATTATGACACGCATTGGCAAGGCATCAGCAGC
TTTTAAAAGCCTGAACAAAATATGGAACTCTAAATTGTATAGTTTTAAAA
CCAAGTTACGTATTTTCAATTCTAA
>rnd-1_family-386#DNA/TcMar-Mariner ( RepeatScout Family Size = 155, Final Multiple Alignment Size = 100, Localized to 1000 out of 1011 contigs )
AATATTGTTGTTAAGGATGTCAAGAGTGTTAAGCACGTGACATCACGGTG
CAGACGAACACGGTGACGTCATAATGACAGTTTAAAGATGGCCGCCCCAC
TTTTGACATGCACCAAAGAGGAGCAGCGTTCTGTTA
>rnd-1_family-75#Unknown ( RepeatScout Family Size = 1537, Final Multiple Alignment Size = 100, Localized to 1000 out of 1011 contigs )
GTCGGCGTCTGTGGCTTAGGCGTTGCGAACGCGCTTCGTAATGCCGGGGT
GCCGGGTTCGATCCCAGCTGC
>rnd-1_family-98#tRNA ( RepeatScout Family Size = 1193, Final Multiple Alignment Size = 100, Localized to 1000 out of 1011 contigs )
ATATTAATAAAAATGTTAATTTTCCGATGTCGTTAGCTATAAACTCGGAA
ACTACTGAACCGATTGCTTTCAAATTTTCACACAACGTTGCCTTTGACTC
AAAGCGTGNTTTTTTGTCAGAAAATCGCACAAACCACGAACGACGTAGCT
CCAGCAACGGTCAAATCATTATTTGTTTCGTTGCCGGCCCGGATTTGTTT
TTAGTTGATTGGCCACCTTTGACTGCTGAGCTCTTACCGAACTTCGCATT
ATTATATAATTTCATTTCCACTAANTGCTTGAGTNTTTGGTAGCGTAGTT
GGTAAGTATTCCGCCTGTCACGCGGGTGACCGGCGTTCGATTCCCCGCTG
GGTGATATAATTTTTTTTTAGCCCTTAACTGGGCGGCTGGCACGTTGTGT
TGTGGTTTACGGCTAGGCTGCGATATCTACGCCTTTTTTCGGTTTTGGGG
TTTACAGCTAGCCTGCGATAGCGGCGACGTGATGCTCAATGGTCATGTCA
CGGGTAATCTTCGTTCGCCCTCGAGAGGGCGGTTGGCACGTTGTGTTGTG
GTTTACAGCTAGGCTGCGATATCTGACCTAAACTCTTCAGTCTTCGGTAG
TATAGTTGTAAGT
>rnd-1_family-426#Unknown ( RepeatScout Family Size = 123, Final Multiple Alignment Size = 100, Localized to 1000 out of 1011 contigs )
CTTTAACGTCTAGGGTTGACAACACAAACGCCGCTCAGCTTCTTNGTACA
TTCTGTCAGTTTATTCTGGTCCATTTATTTCACATGTTCAACACATTATT
CACACTTCTATCACTCGCGACATATTCGAACACTAACCATTCGCGCGACA
TAAAGACNACATCTTCAAATACTACAACCGTCTTCTCTGACTTCTGATGA
TCGACTGACCACGAGNCTAGCTCGGGCTTTCCCTCGCTTACTCGACCAGC
CACAAGTATCTCGTGCCGTCNCTTGTNGCACGGACTTTCTGCTTGCCACN
ATGTAATCGTGGAGACCATGCAAAGCAGGGTCATCACACTCTCCCCCCCC
CCCCTTTTTAACAAAATGATACTTTATGGAACATCAAGTGTCATTTTCCA
TTTAACCGGATATAATAAATCAATTTAANTGTATTGCTACTAGGGATTAT
NGTTCCTGATTATCCTCAATTACTGCCCTTTAAAACTGCTTTCAATATTT
ACTGCATGCTTCCTAGTACTGAGCTGGTGAAGAGTTTAAACCATCTTTGC
ACCTATTGCATCTGTAGTATTGTTTAGTCACTATATCTANTCTATCAGGT
TCAAAGTGAAATGATGATAGTGATGATGATGGTCAGCTTTGAGATATTTA
CTACATAGAAAATTGGATTTTAACCAATATTTCTACATCACCTTTCACAG
GGTGTTAAACCCCAAGGACTCTTAGCCGATATGATAGTGGTGAGATATAT
TTATCATAGTGCTTCCGGTTTCCCAAAAGCTCTATAACACCTTTTACAGG
GTAATTACCCAACCCCAAGGAATCTACCACGGAAAAAAAAAATGCATGTT
GAGATATTTTTTCATAGACTAAAGTCTCACCTTTCACAGGGTAATTACCC
AACCCCAAGGAATCCAACATGAAACAATGATAGTTGAGATATATTTTTCA
TAGATCTTAAGAGTTTCCCCCAAGTCTATAACACCTTTAACAGAGTATTC
AACCCCAAGGAATCTCAGACACCTTTCCCCCTTTAGATGGACACAGATGA
GTTCAACTCCTCTACTGTGCTTGTGCTTTGATGTGTGCACTCTTTCTTTA
CCATCAGT
>rnd-1_family-212#Unknown ( RepeatScout Family Size = 484, Final Multiple Alignment Size = 100, Localized to 1000 out of 1011 contigs )
AAAGAAGACACAAACAATAGATTGCACAATTTATTGCCTGGCATATTTCG
CTGTATCTCGTCAGGTGCATACTACAGTAACAATTANATAAATGAAGCAA
ATAAGTGAATCCTTNAAACTGAAACACAAATTCGACTACATTCAACACTG
CCTGTTTCACCAGGGCAACCGCAAGGTNANGACCATNTCCTTCTGTCTGC
ANAGTTCCGGACTNAACCGGCCGATCGCGGAAGCTTCCGCGAATCTCAGT
AATCTACGGTT
>rnd-1_family-6#LINE/RTE-BovB ( RepeatScout Family Size = 5819, Final Multiple Alignment Size = 100, Localized to 1000 out of 1011 contigs )
CCCCGTGTGGGTTCCGGGGCCCTATTATAGGGAAAACAAGAATAGACCCA
CTGCCTACCCAAAAGCATGTCGTAAGAGTCGACTAATTGGGAGCTTCCTT
CGAAGTCGGAGTGCATCTGCCTGAGAGGCAAGGAACCAGCAGTCTGCATA
CAAATGAGTCAGATCTGTAAAACGGATGCACACGCAACACTCAGGTTCTG
GAACAGGACTGCAGTCCAGAAGTGGACGAACAACCAGAACTTTCCGCCAG
AGTTTACAGCTGGTGAACGCGAAGAAGAAGAAGAA
>rnd-1_family-124#LINE/RTE-BovB ( RepeatScout Family Size = 945, Final Multiple Alignment Size = 100, Localized to 1000 out of 1011 contigs )
ACCAAGAAATCAACATCAGGATAGGTAAGGCAGCAACAACAATGAGCAGA
TTGACAAAGAGAGTTTGGGAGAACAGAAAGCTCACGATTAAAACAAAAAC
CCTTGTCTATCAGGCTTGTGTTCTCAGCACTCTGCTTTATGGCAGTGAAA
CTTGGTCAACCTATTCGCACCAGGAGAGACGGCTAAATAGCTTTCACATG
CGATGCCTAAGAAGAATACTTGGCATTAAGTGGCAGGACAAGATCACAAA
CACTGAGGTACTGGAAAGAGCAGGTACTACAACAGTCTTCTCAATGCTCA
GTCTACGAAGGCTCAGGTGGCTGGGTCACACCTGGAGAATGGAGGATGGC
AGAGTCCCTAAGGACATCCTTTATGGTGAATTAAAGACGGGTAGAAGATG
TCGAGGCCGACCTCTACTACGATATAAAGATGTGTGCAAGCGGGACATGA
ATGATACAGGTATTGAGGTGGACTCGTGGGAACAAAATGCCATGGACCGT
GTTGTGTGGAGAGGGCACATCAGGAAGGGAATGAGAATGAAGGAAGAAAT
GATTGCAGAAAGGATGAGAGCTGAGCGTCTGAGAAGAAACGGACTAAACA
CAAATGTTGACAACAATGGTCCTGAAATCCCATGCTATCATTGTGGAAGA
CTTTTCTTGACGCGGGCGGGTCTTGCTAGTCACACTCGCCATCGCCATGG
GCTGTGAGTCCCATGCCTCCTCATAGCGCAATATAACACTATCGTCTGGA
AAGACGGAAAGGTGCCAAT
>rnd-1_family-297#LINE/R2-Hero ( RepeatScout Family Size = 265, Final Multiple Alignment Size = 100, Localized to 1000 out of 1011 contigs )
TCTTCGCCGTCGAGGTGGGCGCGAGAGGTCTCGTCTCCACTTCGCTCTAC
AATGTGGTTAAAGAACTAGGCTTGCGAGGNAACGAACGNAAACGGNCACT
NAAACAACTGGGCGAGGCNGCCGAAAGGGCCTCGAGCTGGCTCTGGACGC
AACGGAACGNCGTGGGGGACGGGCCTCGGTGAGCTGGTCCGGGTGTCTAG
TGGAAAAGAGTTTCTCATCCCTTGAAAGTCCATCGTGTCCGAATTGTCTG
CCAGTGTCCCTCTGCCAACTGCCAACAAAAGTCCAACATGTGTCCGGTAA
ACCAANCGTAAGCTTGTCGCTCGGTCGTCCAGGTATGCCGACTGCTCTAA
TTATGCTACCGCGGCGACTTCTTATCTCACAGTACCTNCTGCAAATCACC
AANTCGTCTTGT
>rnd-1_family-180#LINE/I ( RepeatScout Family Size = 591, Final Multiple Alignment Size = 100, Localized to 1000 out of 1011 contigs )
AAATACAAGCTGAAAAGTTCCTCAGTATGCCAGATCACCCNATGAAAAAT
AGATTTAAGAACCTAGCCTTGGGACGGTTAAAAAGAAGCAGCTTTATACA
CCAAGCAAAAAGAATATGTAGACAAACCGCTGACCTTCCAGAAATTGGTT
GCCCACTTAAAAGTATTCCGGAACGAACCCCATGGAGAGAGAAATGTAAA
CTAACAGTACAAATCCAGACAAATGTGAAAGGGATATTTGACAAGAAAGA
GCAAGATAGTGTACAACGCAGAACGGCCACCCTCAGTTATATTGATGAAG
AATACCCACAAGAACAATGGGTCAGAGTCTATACAGATGGGTCCGCAGAA
AGTGCAGTTAGAAATGGTGGTGCTGGAGTGTACATCGAATTCCCAGATGG
TACTAGGGATAAGTCCAGCGTACCAACCGGGAAGTACTGCCATAACTATG
ATGCAGAAACTCAGGCTATCAAGATAGCGACAGAGAAACTGCTAAATACC
AATCTTGGCTCACAGTATGTGGTAATGCTGACAGATGCNAAATCAGTACT
TGAAGCACTCCAGTCTAGGAAACTACCAGAATTGCAAACACTGCTGACAC
AACTCAGCCTTCAGCGAAGAGTCGTAATGCAGTGGATACCGTCCCATTGT
GGAGTGCCTGGAAATGAGAAAGCTGATCAACTGGCAGGGGAAGGTGCGAC
AAAAGAGCAGCCGGATGTACCAGTCACATACCACCAAAAGAAAAGAATCA
TTAAATCGATCAGGAAACCACCAGCCCCAGCACAAGACGACTATTTTATT
ATGGACAGACCAGAACAAGTCATTATCCTCCGCCTCAGAACAGGGCACAA
CCGATTACGTAACCACATGTACACAAAATTCAAGATAGGCGTATCAGCCA
TGTGCACCTGTGGAAAGGTGCCCCAGACAGCAGAGCATGTACTCCAGGAC
TGCACCGAATTTGACACATTAAGGCAAACCTTTTGGCCAGAAAGAACAAC
AGTGGAACGTAAACTCTATGGACCACTGAATGAACTAACAACGACAGTGA
AATTTATACAAGAGACAAAACTGCTGATATAGACAACTTATTTCAGGCGA
ACGAAAGAAGAAGAAGAAG
>rnd-1_family-383#Unknown ( RepeatScout Family Size = 156, Final Multiple Alignment Size = 100, Localized to 1000 out of 1011 contigs )
ACTANACAGNCAGAAGGTCCTGGAGATGACATCTTGTCATCATTGGGAAA
CACAGGAGCTGTGAGGAATANAGCATGATAATGAGGCATCAAACTGCACT
TATCCTCTTTCTGTCTATGATGCCTCCCTCAGCTCCTGATGATTCGACTG
TCTTTGACTCTGGTAATTCTGCTCAACTGGATCAGGTAGTGGAGGAGTAC
CTCACCATAGAGGACACAGCAACTGTACNGGTACTCAGCAAGTCTCTCCC
ACCAGTCAGGTCACACACTGTCTCTGAGCTACACCAAGCTCTGGCACTGG
TAGCTGTTTGGGGTACNATCTCCCCCATGTTGGNGATGTCAGGAACCTTC
ACAGGTGTTAGCTGGTGGGTAACAGTTGGTTNNTGGTGGTTTGATGGTTG
GTGGGTGTTGGTTGGACTGTGANTCTTCTGCCAGCTCTTCACAAAGGATN
CATCCTGTCAAGAAAGAACTCAGAATTAGTCATCACCAAGAGGGTAACAT
CTTGACAGGAAAGACAGAACAAGCATCAGTCATCAACCCCCATCTGCTNA
CTCCCCCTGCTCCCCTGTTTCATTCCTCAGAGTGCACTCTCAAGACCAGG
AGACATANGTCTCCTATCATTTATCTGTCTGTTTAGTGCAAGAGANGGCA
AGTCAGATATACAGTGGAGATAGATAGACGCTCTAACACATATATCACTC
TCTCTCTCCCCCTCACTCTGCACGCAGACACCAATATTTACCGTCAGTAC
CTGTATTCNCTAGCCTCCCCAACCGCCCGTCCTACACACCCATTGATCTG
GGTCAAACACACACACACTTTGACTNACAAAGCCCTGACCCAATTCTGTC
CCCATTTCGTATGCACAAACTTCTGTNGTTAGTTTAAAGAGTACACACTT
GTAAGGGTATTAAGTTTTACCAGTATGGTGTGGGTTATNTAGGGCACAAG
CTATTTAGTCTGTACAGGGGAAGGTCTACGTTCGGATCCGCTTCTCTGGA
GATCAAGAACGGTCGAACTNTGTGCGATCACACAGCCGANNCTGNCCTCT
CTGCAGCAGTGACCACTTTACAGACATCATTTTAGGTACTCGTAAACTAT
AATCAACTTACCCAAGCATAGGAAAAGNCCGAGACATTCCAGATCGCCTT
GAAAAGTGAAATTTATACAGGCATAGATTAACACGTCTGGACGCTTGGGA
AGCCGGCAAGGAGAATGGCGCCGCTTAGACACTTCAGGCGTCGGTAGAAA
AGAAGTCCCTTGTATACATGGGCAAGGAGTAAACCGGTTTCCAGGAANCC
TCAAATAACTCCNNNAATATNTATCCNACAGTTGCACGTTTGAAAGTGGA
GTTTAGTCAAAGCAACTAGAAAAGGTAGACATAATAATNTTGTCCGATAA
AGGCTATATATATCGATATAAGGGACTATATACCTTTCCGGACGAGTCCA
AGTTTGAATTTTGTGCCGATTACAGGTAAGACAGGTTATCAGCCTTACGG
ACCGATGCGTAATGGCTATCATTCCACGACA
>rnd-1_family-94#DNA/CMC-EnSpm ( RepeatScout Family Size = 1242, Final Multiple Alignment Size = 100, Localized to 1000 out of 1011 contigs )
AAAAATAGACATTCATTTCTGGAAAAAGTGTGTTGAACATGTGCTCCGAG
AGGAAGACGAGTACTGGCACCGAGATGGATTACAATTTGTTCAGCCAGTA
ACAATTATCAACCTTTTGGGATCGTCAGATTCGGAATGATTAAAACCATT
TTTTTCGATGAGTGGTTGAATATCATCAACCCGTTAGGTACATCTACAAT
TGCAACAAATACATCTCCATATCCAAATGTGTCAACCATAATACAATTTG
CTGTGCAGTTAAGATACACCGTGGGGTCTAATGGTGACTGAAGGGGAATA
CTAACTGTTGCATATTGGGGACATGTTTACAATTGAACAGGCAGACAGAT
TGGCTGGATCTGCACCACTGGGTGGTGAATTGATACATGACAAGGCAGAT
GTGGTCAAGGCCCTTTGGGAACAAGCAACGGAATCAGTAGAGAAAATA
>rnd-1_family-236#Unknown ( RepeatScout Family Size = 403, Final Multiple Alignment Size = 100, Localized to 1000 out of 1011 contigs )
GGTCCTGTTCACGTTTCCCGGCCCATCTACACACTGGCTGACCTTTCATT
CATGCTTTCTCAGACTGTTCTACGTCAGAGGGGTGTCACGTTGTCTTGCC
TCCGATTACATCAGCGCCGATGTCGCGTGTTCTATACTACACGACGACAC
AGCTTTTAACGACCCCAGAACATCTAGAACTGGCCCTAACCCAAACCCCC
CACCCACAGCCTCAGCCTAGGTCCCACGAGAGACTCTTTTCGAAGAAAGC
AGTACAACGTGACACCCCTCTGACCTAGACCAGACTGAGAAAGTGTGTAG
ATGGGCCGGGAAACGTGAACAGGNCC
>rnd-1_family-345#LINE/RTE-BovB ( RepeatScout Family Size = 196, Final Multiple Alignment Size = 100, Localized to 1000 out of 1011 contigs )
CCTGCCCAGCATCCACACGATACTGAAGNANTATCAGCTGCGTTGGGCTG
GTCACCTAGCCCGCATGCCAGACCATCGCCTCCCAAAGAGAGTATTTTAT
GGCGAGCTCCAGCAAGGGAAGAGGTCCCAGGGAGGACAGAAAAAGCGCTA
TAAGGACACTCTNAAGACTGCTCTCAANTCTTTTGGCATCGACACAGCGA
CGTGGGAGGCTGCCGCACAAGACCGTTCTGGATGGCGTACATCCCTCAGG
CATGGTGCATCGGCCTGCCAGGCAGCGGAGGTTGCACAGGCAGAGAAACG
GAGGCAGACTAGAAAGAACCGTACCGCTAATCCCACACTTACTGCGGCTT
CCATCTGTTGTCCGCACTGCTCAAGAACTTTCCGGGCTCATATTGGACTA
ATCAGCCACCTTCGTACTCATAATCATTGATCATTACTACTTTGGATGAA
AGTGGTCTTCATCACTCGTGATGGACGAACAACA
>rnd-1_family-302#Unknown ( RepeatScout Family Size = 261, Final Multiple Alignment Size = 100, Localized to 1000 out of 1011 contigs )
AAAAACACATGGAGAAGGGAGCTGGAGAATGAAGTTAGAAAGATGGGGAG
GACA
>rnd-1_family-432#DNA/hAT-Blackjack ( RepeatScout Family Size = 120, Final Multiple Alignment Size = 100, Localized to 1000 out of 1011 contigs )
AATAACGGTAAGTAATTTCGTAAATATCTTCTTAATTAGCCAGATTACCG
CAATGTGTGTTGTATTTTTGAATTCTGCGTTAATTTTTATATAAGTGTGG
GAAATTTCACAAAGATTGGCAATACAGCACATGTTTAAAAAAAATTGTTT
AGTGGCATCACTGTTTTCGCTTTAAATCCAATATGTTTGCACTAGGAGAC
CGTTTTTCCCGCTTTATAATTAACTTAAAATAATTATTAAATTAGCTAAC
GTTATTTTAATCATTTTTNAAAAAATCCACAACCATTGTAGCATTTGTTC
ATGCATCTGTCATTATTTAGAGCCCTTCGCATTCTCTGTTGGANATATTT
TTNCCTGATCACCCCCAAATCCCAATAATTAATTTCGGCCATCATTGCGC
ATTTTCTAAGATGATTCTTTAGTAATTAACTTCAGATACTTAGTAAATTA
ATAATGTTAAGTGAGCTACTTTTTAAACATCTACAACTCTTGTAGCATTT
TTTNATGCGTCTGTTATTATTTAGAATCCACGGAATTTTCTGTCGGAATT
GGTAAATCTAAGTGGTCGAGAAACAACAGCAGCGCTGACAGCGTTCCCNT
CCATCAGGGCTGCCAATGCTTGGGTTTTCCCCCCAGATCTGGGTTTTTAT
TCGACGCCTTGGGTTNAGATTTTGGAATCTTTTTTTTTT
>rnd-1_family-407#Unknown ( RepeatScout Family Size = 135, Final Multiple Alignment Size = 100, Localized to 1000 out of 1011 contigs )
GGGAACGAGGTGGAGAACGAGGTGGAGAACGAGGTGGGGACGAAGTGGAG
AATAAGCTGAAACAGGCAGAGAACAGGCAAGGAAGAGTTGGACGAGCTTG
ACAGTTCCTCACGGCTGTCAGAGGTTCTATAAGTTANGTTAACACGTTTT
ATGTTAACATATCACCATCATCACACCACTCTAATCCCAGGTGCTCAGTT
TTCTCGCTGAAGCTATCACTATCATCACCTTAACCAGTCACTGTTTGTGT
AAATCAACAAACTGGGAATTTCATTGTTAGTAAATAAAGCTGTATGTCAA
GTTTTATACTACATCAGTTTTTGTAATTCCAAGTGTCTGTTCTTACATGT
TTAATTAAACTGTTAAGATAGAATACATTTGGTGGGGGCTCAAATAATAT
AATAATTCTTTAATTATTCATAATAACGCCGGGAGAAGGTAGANGACGGA
GGGGTCANCTGCCCTGTCTAATAATTCATTCAGTATGATGATCTAGACAT
CTAAAATCCCTTCTCCTTCTCCTGTGGGTACCAAGTNCAGCTAACGTTAA
TNTACNTAACGAGCCAATATGGCTGTTTTCTTGGNTATCCAGGACTTTGT
CTGAGAGCAACATAGCTCAGATANTAGTCCGGTTTATCTGGTGGAGGGNA
TGTGTTGAGAGGAAAATCCCTACTCAACATATAAACATTTAAACCACCGC
GTCACGTCACA
>rnd-1_family-310#Unknown ( RepeatScout Family Size = 250, Final Multiple Alignment Size = 100, Localized to 1000 out of 1011 contigs )
TCATGAACCCAGGTCGGCCCACCCTCCGAGANTGTCTAGGAGNTCGTGGG
CCGAAACANTTGTCGACGAGGGATCACTTCTACTGATGATCGGTAGACCC
CTGCTGTGCATGCTCCCCTGTGGAGTTTCTTCTTAT
>rnd-1_family-219#DNA/hAT-Ac ( RepeatScout Family Size = 456, Final Multiple Alignment Size = 100, Localized to 1000 out of 1011 contigs )
GACAATTTAAATTTTAACTTTTAAGTATCTTCATGCCTTCTTTAATAATG
TCACAATTTATAGCCGACTTTTCTTGATTTTCGCCGCGGCACCCCTGGCA
TACGCACCCAGTTTGAGAACCTCTGCTGTAATGCCTCGGTCGAGTCAGCA
GGCAAAGACCTTGCCAGCTGCTGTACCACGCAACCGGGTCGCAGTTTCCC
CCGCTACGACAGACTTAGGCAACAGCAACTATTGTGTTAATGAGAGAGTT
ATTTCAGTCCATCGCAGTGTATGCAGAAACGGGTGTAAGGTAACCACTAT
TCGTATTCGGCCCGACCGCAACTATTCGGCCGAATACCGAATAGTTATTA
GGTCCACTATTCGGCCCCGAAGCGAATACGAAGCGAATATTCGGTACAGC
CCTANTTAAAA
>rnd-1_family-32#Unknown ( RepeatScout Family Size = 2967, Final Multiple Alignment Size = 100, Localized to 1000 out of 1011 contigs )
TTGTTCCAGAACTTGAGTTTTGCGTGCACATCCGTTTTACAGATCTGGCT
TATTTGTATGCA
>rnd-1_family-346#Unknown ( RepeatScout Family Size = 195, Final Multiple Alignment Size = 100, Localized to 1000 out of 1011 contigs )
GCTCTCCTTTCAACTACGGCCGGTAGACGACAGTAGACGGCCGGTTAGTC
GGAGTTCNGTCCCCTGGCTGCAGTGCAATTACGGAGTGGAGAAGGCACGA
ATCAAAAAACANAGTGAGGTCGACATGCCTGGCAGACCCCGCGCTGCGAC
TCANATTAGCGACCGCGTTCAGTTACCGCTTCTTGCGGCGCATTACGGAG
TGGANNAGAGGGAACGAAACAAGTGACATAATTACTGTGTGTTGGCGATA
GACAGCGTGCAGTGCCCTGCTGTCATCATACGGTTAGGGTTTGGGTTAGG
GTTTGGGTTA
>rnd-1_family-291#Unknown ( RepeatScout Family Size = 285, Final Multiple Alignment Size = 100, Localized to 1000 out of 1011 contigs )
GACGTTCTGCAAAGGACCTGCTACATGATGATGAGT
>rnd-1_family-2#LINE/I ( RepeatScout Family Size = 6996, Final Multiple Alignment Size = 100, Localized to 1000 out of 1011 contigs )
CGATCAGACAATCTGGTTGCATACACTGACGGATCTAAGAATGAAGCAGG
AGAAGTAGGAGCAGGAGTAATAATCCCACAGTGGAATATACAAAGAGAAT
ATAAAATAACAGATCATGTGGCAGTATGCACAGCAGAACTAGTCGGCATA
ATGAAGGCACTAGAGATGGTAATTAATAAACCTCCAACTAAATTTACCAT
ACTGACAGATTCATTGTCCTCGGTGCAGACGTTAAAAACACATAAAACTA
GCAGTAGACCAGATATTAAAGAGACAATCCTAAATCTAACAACCCAGCTC
AAGAATAAAGGATGCCAAGTCACCATTGCATGGGTACCAGCACACAGAGG
TGTAATAGGCAATGAAAAAGCTGACATAGCAGCCAAAAAGGGAGCTAAAT
GTGATGTTTTAGTAGATGTAGGACTCGGAAAAACTGAAAGGACCAGCATA
ATCAAACGACATATAATTAAAATGTGGAAACTNCAATGGCAAGGGAGCAA
TAATGGCAGAGATGCCTACAACAACCTTAAAGAGCCCAGCCTTAACACAC
AGGTACGGGACAAACTGAAAATCCCAGCTAACAAACTACTATGGAGAGCT
AGGTTAGGGTGGCACCCAGAGAAATTTACATCTCCACTATGTCTGGACTG
CTTTCAAGATAATACANTAGAGCATTATATAATAAACTGCACTAAATACA
AATTGGAGAGGAAACCCATTGAGGAGTATTTTCTAAAACGCAAACAACAG
ATTACTGCAAACAAATGTTTAAAGGTGGATAGCAATAAAGACATCCAAAA
ACTNGTTAAACAGTACCTNATTAAAACAAACCAAAACTAAAAAGACCAGG
TTAAGGATCNACTCAGNACAGCAGAAGGAACTGATCAGATGGTGACTCCG
GACACCCTAGCGTAAGGGAGGTAGTGTAAGTATGATGAGTGCATAGATGT
GAACATGGATACATACACAAGGATGAGTGCGTGTAGTATGAGTGCATTTA
TGTATAGGATGGATACATAAGACACGGTGTATGTAGGCGGATGGTAAGGG
ATCACGTGTGGACGGGACAGTGGGAATATAGNTGTGCGAAAGGTACAGAT
GAACGAGTACATGGATATAGAAATGTATTACTGTATGCATGTATATGTGT
GTATGAGTGTGCATGTGTGTATATATATGAGAGCGTGTATATTTATATAT
TTGTGNGTGTATGAATGACAGTGCACTCAAAGAACCCATAAATTGTGTTG
CTGCATGTCTGTTAATTAATGAGAACAAATGGAATGAAGTGTGTACGCAG
CAAGAACGTCATCAACGCACACCATCCACCAGAACATGATAAGACAGTAC
CGGACAGGTCACATACCAGTAACGGGACATAACTTAAAAGTGACACGACC
AGACGANATTACAGACANAGCGACACAAAAACGCGCAAGACATGGAAGAG
TGAATGTCNCTACGTGTGGATGTACNCGTTTTTTATGAATGTAAGTACAG
GCATTGGTAGACGCATATGAAAGAGTNTGCGTGTGTACGNAATGTCAATT
AGGTATGCATACACGGATAAGTATGAAAGGACGTGCAAACATGTAGTGTT
GTCTGCGTGTATGAGTACTCGAGTGCATGTACGCATACACCTAGTTTGTG
TGCGTCCATATACTCCGGGGATTCATACACAAAACCATCCCATTCCACAN
CATGCATACAACATGCACATGACCGGCGGGACTCACAACAAGATATGACT
GACAGCAAATAGGGAAAACAAGTGACTCGATANTGACAGGACTAGAACGC
ATAACCACCAATACCACCCCATCACTGGGATGATAGCAAAGGTTGGTAAC
GTGATACGCATAGTCCCGGCNAAAGGCCACGCTAGAATCCAGCAAGACGG
CAACGACGAGAANTGACTGAATGGCCTCCCGCCCCCTTTCCCCTCACCCT
TCCCTACCTCTTTCGGATGCACTATGAGTTTAACCCCCCAACCCATTCCC
ACAGAGAGCACTTGAGTTCGTTACCCAACATGCCACAGCAATTCTCATCG
CCGAACATTTGGATCTCAAAGCGTGAGCTGGATGCTCCGGTTATATGGTA
TTTACGTACACCGGAGCCTAGCTACCAACACAACCCGATCACACAATAAC
AAATGACGACTGGACCCGCTTGAGGCTCCACATAAACTCTCACACACATA
TCCACGACATGACTAACCCGTTCTTATTGCAGGAAGACAACTATAAGACC
ACTATGGTCACACGCGGAATATTTTCACATTTCGGAACTATCCAAANTCA
AAAACTGTTTTCAGTACTTTTTGGCAAAATTAAAATACTCAAAATTTTAA
AACTATAAATGGTGGTCCAAAGGACGTTGTGTATGGAAGCTCGCTCTCCT
ACGAGATACGCCTGGCCAAATCAAAGGGAGACAGAACAAACAGGAAACAC
CAAGAAAGAAGAGGGAAGACATGCACCAGTGACAACAGGACGAGCGGTCT
GATTCGGANGGAAGCATCAAGCCCAGAAATGGCGCAAACACTAGAATTCA
GTCACGAAAGTGACGCAAATAACCCAGACCACAAATATAGGCGGAGACTG
TTAGCAGCCTCGGCTAGCTAGCAGCAGTCTGAACGTGGTCGAGCTTTTCT
TTTTTTTT
>rnd-1_family-114#LINE/I ( RepeatScout Family Size = 1034, Final Multiple Alignment Size = 100, Localized to 1000 out of 1011 contigs )
AGTTATGAGTTGGATTATCTTCACAGCACTCCGGACACGTCCATAGGCGC
TCAGATTCCCCTCTCAACATATTCATCAGCGTCGCGCGGTTAATAGTGCC
AGTCCTATGTTGGTTAACAAGACTTCGTGTGCGTCCGGTGTGCTTCTCGT
GCTTGGCTGTGCCGATCTTTACTCCCAATTCTCGTATTCTTAGCAGTGAT
GTGGACACGTTGCTTCCAAAATCCTCAGAACGTCCTATCTCTCTAAGGGC
ANTGACAATGTCTGCGTGATCCATGGGCCGGCCATCTTCAATTAATGCAG
CGCCTGCCAGTCTATCAGCTCTTTCATTACCAACAACGCCTGCATGCCCT
GGGACGAATATGAAGGTAACTGCACGCACAGGAGAGTTTTGCAATGACTC
AANCCACTGTCTGCGTAACCAGCCTGCCTCGACCCGCCGGATCATGCTCA
NAGAATCACTCA
>rnd-1_family-423#Unknown ( RepeatScout Family Size = 124, Final Multiple Alignment Size = 100, Localized to 1000 out of 1011 contigs )
GGCTCTCCTTNNAACTACGGCCGCTAGACGACAGTAGACGGCCGCTTAGT
CGGAGTTCAGTCCCCTGGCTGCAGTGCAATTACGGAGTGGANAAGAGGGA
ACGAAACAAATGACATAATTACTGTGTGTTGGCGATAGA
>rnd-1_family-166#Unknown ( RepeatScout Family Size = 655, Final Multiple Alignment Size = 100, Localized to 1000 out of 1011 contigs )
ATAGTCCATGCCGTGTGGCGTTGGTAGTCATGTCTATCCACAACCTTCTG
TCT
>rnd-1_family-176#Unknown ( RepeatScout Family Size = 616, Final Multiple Alignment Size = 100, Localized to 1000 out of 1011 contigs )
CTTTGAATCGTTCCCCAAAATGGCGGCTTTAATATGATGGCGTTCGAAAG
AGAGCTAAATTGGCCAATTTCTGGCCATAAAATATCCAAAAATATCCGAA
TGCGGGTCAGTTCTATTAAAAATATATGTGCCGGCTCCGNATAACGAAAC
AAATGCTCTAACAGGGTCTCGGCGATATGTTACTTGCGGACCTGCTTCTG
CGACTGTGCCTCACCGCCGAGCGTATCCCCCGCGCCGCTACGCGCGGCGC
GGATGGGGGCTAAACTAGATGGCTGGGACTCACGAGCGGCAGCTACCGCA
TCTCCTGCAACTTCCTCCAATTANTTTGCTCGTGAGTCCCAGGCACCTAG
TTTAGCCCCCATCCGCGCCGCGCGTAGCGGCGCGGGGGATACGCTCGGCG
GTGAGTTTAATCGCGTTTNGCGCATGCCGACAAGTCTGACATCTACCGCT
GCTAAATCCTCCAATCGGAAGAACGCGGTATCGCTAATCGGCTTTCATCG
TCTGTAATGTCTCGAAATTGGTCAACGGTCGCTANTATCGTCTGCTAGTA
TCGTCTGCAGAAACGCTCGAAATTGTTGTCAACGGTCGGTATTTATCGTC
TGCTACTAGTACCGTGTGCAATGTTGATATTGATTGTCAAGTAATCCTAG
TTTTGCCGCGATTTGTTCCTTGGCAGAAAGTCCGTATTTTAGATATACGC
GAACACCGTCGTTCGGATATTTTTGGATATTTTATGGCCAGAATGTGGCA
TGCCGCCATTTTGGGGAACGANTCAAAGGAGCGCCAA
>rnd-1_family-260#LINE/RTE-BovB ( RepeatScout Family Size = 357, Final Multiple Alignment Size = 100, Localized to 1000 out of 1011 contigs )
TGTAGGTCTTGGATGTTTGAGTGGCCCATGAGCGAGCCTTCCCTGATGAT
AGTTCTACGTAGGGTTTCCCTTGGTCTTCCACGAGATCTTTTCCCCTGTG
GTGTCCAAATGAGGGCTTGGTAAGGAAGTCTTGATTTATCCATTCTAAGG
GCGTGGCCGACGTAGTTCCAGCGGCGTTTTCGTATAAAATTAGACACATA
CTCTTGCCTGGNTTCTTGCCTTATTTGTGTATTGGNTCGGAAATCTGACC
ATTTGAAATTTAGTATTCTTCTAAGGCATTTATTTTCAAAACTGTCTAAT
TTTGTGTCTAGAGTTTTCGTTGATTTCCAGCTCTCGCATCCATAGGTTAG
TACTGGAATCACACAAGAATTGAAGATCTTGAGTTTTGTGTGTTTGCTAA
GTGTCTTTGATTTCCAGATGTTNGACAGTTTATTGAAGGCACTAGATGCC
AGTGCTATTCTAAATGGTATTTCTGGTGCGGTATCTCCTGTAGATGACAT
CTTGCTCCCTAGATAAGTGAAACTGTTGACTTTTTCAAGGCTGTTGTTGT
TCAGCGTGATATCAACTGAACTGTTGGTAAGGTCTAGAATTTTTGTTTTT
GCGGTGTTAATTTGGAGTCCAATTTGTTCTGAGAAATTCTGGAGTCGATT
GATTTTTTCTTGGGCGTCTGTGTGTTCTGAACTCAGGAGTGCTATGTCGT
CGGCGAAGTCTAGGTCTTCCAGAATTTTGTCAACCCATGTAATGCCTAAA
TTTGCGTTATTTATGCACTTGCGCATGACCCAGTCGATTGCTATACCAAA
AAGCATCGGCGATAGGACACAGCCTTGCTTCACTCCTGTTTCCACCGGGA
ACCAGTCAGAATTGCCGGAATCAGTTCTTACACAGCATCGTGTTTCATTA
TAAAAAGATTTTATGATGTTGATATATTTGATGGGGAAACCATAGATGTT
AAGCAATTTCCAGAGTGTTGGACGATGGATACTGTCGAAGGCTTTTTGGA
AGTCGACAAAGTTGATCAATAATTTCGACTGGAATTCTGTAGAATCTTCA
ACAATTATTCTAAGAGTAAAGATGTGGTCTATGCATGACCGCTTGGATCT
AAAACCGGCTTGTTCTTCCCTTAATCTTTCATCTATGGATTTTTTCAATC
TTTCTAGTAGCATACTACAAAATAGTTTCCCTGGTATCGAAAGCAGGGTG
ATGCCTCTCCAGTTGTTACAATCGGATAAATCACCTTTTTTAGGTAATTT
GAAGATTACACCATCTTTCCATTGTTGTGGTGGGTATTCGTTTTGCCAGA
CTTCATCCATCAGCTGGAGCAAATGTTGCAGGGTGTTTTCATCCGCTGCT
TTGAGCATTTCCCCTGAGATGTTGTCCTCTCCGGTAGCTTTGTTTATTCT
TAATTTTTTAATAGCTGTTTTAATCTCCTCTATTGTGAATGACTCGCTGG
AGGCAACTAGTGTCGGTGTAATAATTTCTTCTTCTAGATTGGGAATGATG
TCAGGATTTGGTCTATTTAATATTTCCTTGAAATGTTCTGCCCATCGCTT
TGTTTGTTGGTCGTCGGATAGCAGTAGTT
>rnd-1_family-251#LINE/RTE-BovB ( RepeatScout Family Size = 370, Final Multiple Alignment Size = 100, Localized to 1000 out of 1011 contigs )
CGATTGTAACAACTGGAGAGGCATCACCCTGCTTTCGATACCAGGGAAAC
TATTTTGTAGTATGCTACTAGAAAGATTGAAAAAATCCATAGATGAAAGA
TTAAGGGAAGAACAAGCCGGTTTTAGATCCAAGCGGTCATGCATAGACCA
CATCTTTACTCTTAGAATAATTGTTGAAGATTCTACAGAATTCCAGTCGA
AATTATTGATCAACTTTGTCGACTTCCAAAAAGCCTTCGACAGTATCCAT
CGTCCAACACTCTGGAAATTGCTTAACATCTATGGTTTCCCCATCAAATA
TATCAACATCATAAAATCTTTTTATAATGAAACACGATGCTGTGTAAGAA
CTGATTCCGGCAATTCTGACTGGTTCCCGGTGGAAACAGGAGTGAAGCAA
GGCTGTGTCCTATCGCCGATGCTTTTTGGTATAGCAATCGACTGGGTCAT
GCGCAAGTGCATAAATAACGCAAATTTAGGCATTACATGGGTTGACAAAA
TTCTGGAAGACCTAGACTTCGCCGACGACATAGCACTCCTGAGTTCAGAA
CACACAGACGCCCAAGAAAAAATCAATCGACTCCAGAATTTCTCAGAACA
AATTGGACTCCAAATTAACACCGCAAAAACAAAAATTCTAGACCTTACCA
ACAGTTCAGTTGATATCACGCTGAACAACAACAGCCTTGAAAAAGTCAAC
AGTTTCACTTATCTAGGGAGCAAGATGTCATCTACAGGAGATACCGCACC
AGAAATACCATTTAGAATAGCACTGGCATCTAGTGCCTTCAATAAACTGT
CNAACATCTGGAAATCAAAGACACTTAGCAAACACACAAAACTCAAGATC
TTCAATTCTTGTGTGATTCCAGTACTAACCTATGGATGCGAGAGCTGGAA
ATCAACGANAACTCTAGACACAAAATTAGACAGTTTTGAAAATAAATGCC
TTAGAAGAATACTAAATTTCAAATGGTCAGATTTCCGANCCAATACACAA
ATAAGGCAAGAANCCAGGCAAGAGTATGTGTCTAATTTTATACGAAAACG
CCGCTGGAACTACGTCGGCCACGCCCTTAGAATGGATAAATCAAGACTTC
CTTACCAAGCCCTCATTTGGACACCACAGGGGAAAAGATCTCGTGGAAGA
CCAAGGGAAACCCTACGTAGAACTATCATCAGGGAAGGCTCGCTCATGGG
CCACTCAAACATCCAAGACCTACAACAGATTGCAACGAACCGCCATGCAT
GGAGAGTCATGACCTCTGCCCTATGCGCCGCACTCGACACAAGAGGAAAG
ACTAACTAACTAACTAA
>rnd-1_family-27#SINE/tRNA ( RepeatScout Family Size = 3411, Final Multiple Alignment Size = 100, Localized to 1000 out of 1011 contigs )
GCGGCGTCCGTGGCTTAGGCGTTGCGAGTCCGACTCGTAATTCCAACGTA
CCGCGATCGAAACCCACTGCTGGCTGCGTGGATTTTTATCATGGTATGGG
GCGTCGCAGGTCGACCCAGCCTAAAATGGGTACCAGGATGGCTGTCCTGG
GGAAGTAAAGACGGCCGGCGTAATGCTGACCACATTA
>rnd-1_family-369#LINE/RTE-BovB ( RepeatScout Family Size = 172, Final Multiple Alignment Size = 100, Localized to 1000 out of 1011 contigs )
AGACATAACACNCTTTTAAAAACCATACTGGAGGGAAAGGTCGAAGGCAA
GAGAGCAAGAGGTAGACA
>rnd-1_family-246#LINE/I-Jockey ( RepeatScout Family Size = 380, Final Multiple Alignment Size = 100, Localized to 1000 out of 1011 contigs )
AAAAGAGAAAGCAAACTGAGGTACCTGGGNATCACTTTCGATAGAAGCCT
GTCCTTCAGGGATCATGTGGAGGCAGTTGCGGCGAAATGCCAAAAAGGAC
TCAGTGCNCTCAAGATTATGGCAGCAATGGACATGGAACAAAGAATGCTG
TTCACAATGTTCCAGCACGTGATCCTGTCGGTGATAGATTATGGACTTGG
GATGCTTACCGTATCAAAGAGTCAGCTGACGAAACTNGAACGCATACAGA
ACGAAGCCATGCGGGTNATTCTGGGATGTACAAGAGACACCCCGGTAGTG
TGTATGCGATACATNCTTGCACTGCCNACTATTGCAGATAGGCTCAAAG
>rnd-1_family-410#Unknown ( RepeatScout Family Size = 133, Final Multiple Alignment Size = 100, Localized to 1000 out of 1011 contigs )
TAATTATGTCATTTGTTTCGTTCCCTCCTTTCCACTCCGTAATTGCACTG
CAGCCAGGGGACNGAACTCCGACTAACCGGCCGTCTACTGTCGTCTAGCG
GCCGTAGTTGAAAGGAGAGCC
>rnd-1_family-103#Unknown ( RepeatScout Family Size = 1155, Final Multiple Alignment Size = 100, Localized to 1000 out of 1011 contigs )
AGTCTGGTAGTCTTAGTTTCAGCTTCATAGCAAACGGGTCGCCCCATCTT
TGCTCCGCTCCTGTGCCAACGAAAAACACACAGAATGTTTATCACAGTCC
CTTGTGGAAAGATTGACAGACTGCTGTCTCAGCATATCTAGCATACACNC
GCATTAAAAGCATACGGTAGCCATCCGAAGTGCTAACACAAACAGTCCGA
CATTAGAAATGCAGTTCATCATTGATGGTAGCAGAAGTCGCCAACAGATC
AGCAGTTGCCCACGCGATCAATTTTAATCACATANGGGCACCGCCAACAT
TGCGACGACAGGCATCGCGCCATTTTCTGAATCTACAATTCACACCACCA
CGTTGGTCACAGTCGAAAAAACATTCCAAATGAAATCCGCAGCTCACAGT
GTCACGCCATGCATTCAACTCAGAAGCTGGGCGACGAAACTATATCCAGT
CTACAAATGGAGCAAAAATGCANCGGCCACCGTCCGGCAGAAGCAAAAAA
TTTGCCTCGGCTCCGAACAGTGCCGCTGCCTAGCGTCCATTTTGACCGGA
AGT
>rnd-1_family-442#RC/Helitron ( RepeatScout Family Size = 114, Final Multiple Alignment Size = 100, Localized to 1000 out of 1011 contigs )
TATATATATAAAAATCAATGTTTGTGTGTTTGTTTGCCCCCTATAGACTC
GGAAACTACTGAACCGATTTAGCTGAAATTTTCAGGATATGTTTGTTTTG
ATACCGGATTTTGAACCGTCGTGGTTTGAAATTCAACCTGTCACTGTTAG
AGATAGGTGACCACAATTTATGCCAAAATATTCGAAACTAATATTTATAA
CTTTAGTGATTTCTAATTATAGCCACGTTAGTAATTGCGCATGCGC
>rnd-1_family-261#Unknown ( RepeatScout Family Size = 351, Final Multiple Alignment Size = 100, Localized to 1000 out of 1011 contigs )
GGCTATCCTCCGAATAACGGGCGCNAAAGATGGCGGCCGCAAAATATCCT
NNCGAGCCNCAGTCACGTGTCAATTGCGCACTTCCGGCGAC
>rnd-1_family-86#Unknown ( RepeatScout Family Size = 1375, Final Multiple Alignment Size = 100, Localized to 1000 out of 1011 contigs )
GAACCCACGACCTTCCGATCCGCAGGCGAGCGTCTAGCCGCTACACCACG
GCGGCTC
>rnd-1_family-316#DNA ( RepeatScout Family Size = 244, Final Multiple Alignment Size = 100, Localized to 1000 out of 1011 contigs )
CAGTGTTGCCACTTTGGATCTTTTATATCCAAATTTAGATCTTTTTCATT
GCATTTAGATACTGTTTTTGACGTTTAGATCGTAAATATTTTTCTAGATN
CTTTTCATATGGAGTTAGATATTTTATAGATTTTTTTTCTTTCATTGTCA
ATTTAATAATTACTGTGTAAAATATTTACTACAATATTTTTGTTTTGGTC
TGGCACGTACATTGTGACAACTGCCATTACTTGAACTTTGAACTCTCACT
GGGGTCAACGCACAAATATCTGGCAGCCCCGGTACTGATTAATAAAAACG
CGCGTAAATCATACTAACTTTGTTTCAACCGTATCCTCACTGTGCTGACT
TTGCGTTTCTTTTTCATGTGATTTAAAAAAAAAAATTGCTCACCTTCTTA
TGTGGCTTTCACTTTGAAAAAACCTTTCAACATGCCAAAAGTAAAGTATG
AGCAAAAAATTTGGAAAGAGTGGTTGCATGATGACAAAATTAAAAACTGG
GGATATGACCAAAGCTTGTTGTAAGTACTGCAAGTGTGAAATTAAAGCGA
AAATACAAAACTCAAAGAGTCATGCAGAGACTAAAAAAGCATAAAACTGC
AGTTTCATTTAAAGATATTACACCGCTGACATCTGTTTTCAGAACTATAC
TGATAAATGAATCATCAAAAGTTGAAGTATCAGTCGCAATGTTTTTAATT
TGTCACTGCGCAATTTCAAACTGTGACCATTTGATCGATTTGTAAAAAAT
CTTGGACTAGTTCAATTTGAAAAGTGTGATGTAGAAAGTATAGTTTAGGA
ACTGAAGGACCTTTTAATCAGCAAACAGTTAGGCTTGAAGAATTTGGCTG
TAATTGGTACTGATAATGCCTCAGTGATGGTTGGTATAAACAATGGCGTT
TATGCCAAGTTGAAGGAAGCTAACCCATCGTTAATACTTATAAAATGTAT
GCGTCATTCATTGCAGCTAGCATTATCACATGCTTCATCTAAATATTTAC
CAAGGAATTTGGAATACCTTATTGCTGAAACACTTTACTGGTTTTCCAAA
TCATTTGTCAGACAACAGCAATACAATACATTATATACAGCCTTGAATGA
TGGTTCCACACCACCGAAAATTCTGTCAGATTGCAAAACTAGATGGTTAT
CAATTTAACCAGCTGTTGAAAGAATTATGAAGCAATGGCTGAAGTTGAAG
ACACACTTTGAAATAACAAGACAAAGTGAAAAGTGCTACACAGCTGAAAT
ACTATATGGAATGTACAGTGATGAAAAAAATTTGTCATTCATTCTCTTTT
TATAACCTATTCTAATGGAAGTGCAAAAAGTTAATAAACTGTTCGAATCT
AAACTTGTTGATAAAGTTAAATTACTTGACGATCTCACCTTGCTATTTCA
CTCGGTAAAAGACTGGTGTTGCCAACTTCTAAAGCTGATTTTGCTCACTT
GCACTATAGAGAGCTATTTGGCTCCTAAGCCACACCTTGGATATTAAATC
GAATCAAAAATTGATGATTTAAAAACAAAAGGACTGTTAACAGAGAATGA
AGAGAACAACTTAAGAAAACGCTGTCAAGATTTCCTTATCTCATTATTGA
AGCAACTGAAGCAGAGACTTCCTGAAAATCTAGATGTTTTGAAAAATATT
TCACTTTTTTCTGTGAGCAACATACTTCAGCCAATAAAGGACATACCTAA
ATATTGTAAAGTTATGAAATTTTTAGGGGCTACTGATAATAGTGTCGCGG
AAGCAGAATATCAGTTAACCAAAATAAAGTTAGCTGAATGGACAAACAAA
ACAGAAACTAAAGCGTTTTGGAGTGAAGTGAGACAATTTAAAGATGCCTC
ATCAAACAGTCCATTCTGTAAGCTCTTTAAAGTGCCATGTCTGCCATGAT
ACTACCCCACTCAAATGCTGACGTAGAAAGAGTTTTCAGTGCTAGGAATT
ATATCAAATCTAACCTAAGAAACAGGATGAAATTTTGACCTCTTAAATGC
TATCTTGACANTAAAATTCGGCCTGATGAGAGTAGAGAAATAGGCCTCTG
TTCCACTTATCAGCTCCCTGATTGGGTATTAAAAGAAATTGGAACAGCTA
AAGCATACCAGGGTCATTTTGGATCTGAAGCTTCAACTTCATCATCCAAG
CTAAGTTTATCCTGTGGATCTTGTGAGGCAGACNTCAGTGAAGATGAGGA
CATGATTCTGTAGGGTAAGTCATATCAANNGCTATGTAATTTGTGACTCT
TTCCATTTGGATGTTTTTTCTAGATNTTTTCCACGCAAATTTAGATGTTT
TTAGATATTTTTTGACNCCGTTTTGGATGTTTTTTGTCAAAGAAAAGTGG
CAACACTG
>rnd-1_family-83#SINE? ( RepeatScout Family Size = 1391, Final Multiple Alignment Size = 100, Localized to 1000 out of 1011 contigs )
GGGGGCTGCGTGGTCTCGAGGCATGGTGTCCGCCTCGAGTGCTAGAGGTT
CCGGGTTCAATCCCCGGTAAGGGCTGGGATTTTTTCACGTGGACTTGGAC
TTCTAGTAATTCCCCCTGGTCTCTGGGTAGTGAGATCGGACGCCCGTGTG
CATTGTTGCGCACGTAAAAAAATCCCTTGGCAGTTGGAAATCGAAAAGAG
TAGCCTAACGGCGCTGCCCGGGCAAAATTTGGAGTTAAAAATCTACCCAA
AGTATTTCAGGATCCTCGCCGGTGCTACAGAGCCTGTGCACTGTGCTGAG
CTTCTTCGGACTCAGACTTGAGTTAGAAGAAGAACGGAGCACTTATGGGT
TACTACCCGTGTGCCATGATGTTGATCCGTTGTTCAAACCTCAAA
>rnd-1_family-364#Unknown ( RepeatScout Family Size = 176, Final Multiple Alignment Size = 100, Localized to 1000 out of 1011 contigs )
AGTAGTGGGGGTGTCCAGCCAAGTTGCGCCTAGGAATATTATATATTCTG
TAGTGCCANAACTTGAGTTGCCCTACTCCTGAAATAAGTTGAGCGTATAT
TGGCCGCGGGATATCCCTTAGACCAATACGAGCCGAC
>rnd-1_family-268#Unknown ( RepeatScout Family Size = 338, Final Multiple Alignment Size = 100, Localized to 1000 out of 1011 contigs )
CAGATATCGCAGCCTAGCTGTAAACCACAACACAACGTGCCAACCGCCCT
TTTAAGG
>rnd-1_family-80#Unknown ( RepeatScout Family Size = 1485, Final Multiple Alignment Size = 100, Localized to 1000 out of 1011 contigs )
TTTTTTCAAAAATGACCTTGGCTCCCAGGTCGACCCAGCCTTGAGTGGGT
A
>rnd-1_family-414#Unknown ( RepeatScout Family Size = 130, Final Multiple Alignment Size = 100, Localized to 1000 out of 1011 contigs )
GGTTTAAATGTTTATATGTTGAGTAGGGATTTTCCTCTCAACACATNCCC
ACCCACNNGANAAACCGGACTANTATCTGAGCTATGTTGNTCTCAGACAA
AGTCCTGGATANCCAAGAAAACAGCCATATTGGCTCGTTACGTGANATNA
ACGTTAGCTGNACTTGGTACCCACAGGAGAAGGAGAAGGGATATNTAGAT
GTCTATACACCACACTGAATGAATTATTAGACAGGGCAGTTGACCCCTCC
GACTTCTACCCTCTCCCGGCGTTACTATAATAATTAAAGAATTATTATAT
TATTGAGCCCCCACCAAATGTATTCAATATCTTGNCAGTTTAATTAAACA
TGTAAGAACAGACACTTGGAATTACAAAAACTGATGTAGTATAAAACTTG
ACATACAGCTTTATTTACTAACAATGAAATTCCCAGTTTGTTGATTTACA
CAAACAGTGACTGGTTAAGTGATGATAGTGATANGCTTCAGCGAGAAAAC
TGAGCNCCTGGGATTAGAGTGGTGTGATGATGGTGATATGTTAACATAAA
ANATGTTAACNTAACTTATAGAACCTCTGACAGCCGTGAGGNACTGTCGA
GCTCGTCCAACTCTTCCTTGCCTGTTCTCTGCCTGTTTCAGCTTATTCTC
CACTTCGTCCCCACCTCGTTCTCCACCTCGTTCTCCACCTCGTTCCC
>rnd-1_family-382#Unknown ( RepeatScout Family Size = 158, Final Multiple Alignment Size = 100, Localized to 1000 out of 1011 contigs )
TCATCATCATCATCATCCTGTGTGTGCCGTTANACGTCACATAGGGCTCG
CANTCNATTCCTCCACTCCGCTCTATTGCATGCA
>rnd-1_family-185#LINE/RTE-BovB ( RepeatScout Family Size = 556, Final Multiple Alignment Size = 100, Localized to 1000 out of 1011 contigs )
TGAAACCAGTCATACAGTTCATTAAAGAACAACAAATGAGATGGTTTGGC
CACCTGACGAGAATGCCCTGGTACCAACTGCCACAGAGAGCCACGCTGAA
GAAATATAATGAACACAGAGCAAGGGGAAGACCACGCAA
>rnd-1_family-22#SINE/tRNA ( RepeatScout Family Size = 3803, Final Multiple Alignment Size = 100, Localized to 1000 out of 1011 contigs )
AGCCTAAAATGGGTACCAGGATGGGCTGTCCTGGGAAAGTAAAGGCGGCC
GGCGTGATGCTGACCACATCACCCA
>rnd-1_family-127#LINE/RTE-BovB ( RepeatScout Family Size = 926, Final Multiple Alignment Size = 100, Localized to 1000 out of 1011 contigs )
AGAACTTGGTAACAACTGGCAAGATTGATGGAAAGAGAGCAAGAGGAAGG
CAAAGAGATAAATACCTGGATGGCTTGGCCANATGGATGGGGCGAGACAA
GAACACTGACCTGATCCGTGATTCTGGTGATCGTGTGAGATGGCGAAACA
TGACAGCCTACGCTTACCGGCACGGCACATGATGATGATGAT
>rnd-1_family-97#LINE/I ( RepeatScout Family Size = 1195, Final Multiple Alignment Size = 100, Localized to 1000 out of 1011 contigs )
CTTACTGACATTAATTTTGGAANTGAATGGATAATTATGCCTCCCTCTCC
AAACGTTAATATTACAGTCCGTATCACACTCGACGGAAGCTGTAGAGAGC
AGATTCCTGGCATTGTTGACACTGATTGACGAAAACACAGATGAAGGTGA
TGCTATAGTTTACACAGACGGGTCAGTAATTCGGGGCAAGCGAAGTGCAT
GGGCATTCACAGTAAGCTCAAGGGGGAAAACCGTCAAGGAGATGAATGGC
GCCTTCGCTGTTACAACTAGCAGCCTTACAATGGAAACTATGGCTGTAAC
AAGGGCTTTAGCATGGCTTGGTACTCAAAAGTTCACACACGTATGCATNC
TTAGTGACTCGATGAATATGCTTNAAAAAATCCAAGCTGGATTTATCAGG
CAAGAATGGATTGNAACACTAAGCACTTCGCGAATANCTGCCCTAACCTT
CATCTTTGTGCCAGGTCATGCGGTGTTCAAGGGAACGAGCGTGCAGACTA
TCTTGCTGACACTGCGGTTGCTATGGCTGGCCCAGTACTGGACAGAAGTG
ATGTTATCAATGCCATGCGCTGCACTTACCGTACCGAGGAGCACGCCAAA
GGACATGACTCCGTATCCCTGTCTAGACTGATGGACATGGGGGTGCAGCC
TGGAGCTGCAAGAAATGAACATTTCACTAAGGGGACAAGACGTTTCATTA
ACCAACACAGAACAGGCGTCATCAGTCGTTTTACACTTGTGGAGCTTTTG
AGGAGGAGATCGGAGCACCTATGGATCTGTCCGGAGTGCTGTGATGATAA
TCCTTTCTAATCACTAATCAC
>rnd-1_family-62#LINE/I ( RepeatScout Family Size = 1854, Final Multiple Alignment Size = 100, Localized to 1000 out of 1011 contigs )
AACAAGCATGTCGTAAAAGGCGACTAATTAGGGNTTTGCTGAAATCGGAT
GTGTTGGGCCGAAAGGCGCAGATATCGCAGCCTAGCTGTAAACCACAACA
CAACGTGCCAACCGCCCTTTTAAGGGCGAACGCAGAAGAAGAAGA
>rnd-1_family-298#Unknown ( RepeatScout Family Size = 265, Final Multiple Alignment Size = 100, Localized to 1000 out of 1011 contigs )
TCTTAGTGCACTTGTATTCATGGCGAGGCGCAGACGCCGTCTGGAGGTGA
CAGGTTCGATTCCCGGCACGGTAAC
>rnd-1_family-222#DNA/hAT-Ac ( RepeatScout Family Size = 449, Final Multiple Alignment Size = 100, Localized to 1000 out of 1011 contigs )
AAAAACTCTTTTCGACAGTGGCGAGGAAAGACAATTTAAATTTTAACTTT
TAAGTATCTTCATGCCTTCTTTAATAATGTCACAATTTATAGCCGACTTT
TCTTGATTTTCGCCGCGGCACCCCTGGCATACGCACCCAGTTTGAGAACC
TCTGCTGTAATGCCTCGGTCGAGTCAGCAGGCAAAGACCTTGCCAGCTGC
TGTACCACGCAACCGGGTCGCAGTTTCCCCCGCTACGACAGACTTAGGCA
ACAGCAACTATTGTGTTAATGAGAGAGTTATTTCAGTCCATCGCAGTGTA
TGCAGAAACGGGTGTAAGGTAACCACTATTCGTATTCGGCCCGACCGCAA
CTATTCGGCCGAATACCGAATAGTTATTAGGTCCACTATTCGGCCCCGAA
GCGAATACGAAGCGAATATTCGGTACAGCCCTA
>rnd-1_family-47#Unknown ( RepeatScout Family Size = 2405, Final Multiple Alignment Size = 100, Localized to 1000 out of 1011 contigs )
CAAGTTCTGGAACAAGACTAAAGTCCAGAGGTGGACGAACAACCAGAACT
TT
>rnd-1_family-84#LINE/RTE-BovB ( RepeatScout Family Size = 1382, Final Multiple Alignment Size = 100, Localized to 1000 out of 1011 contigs )
TGGTGTAAAACGTTTAAGAACCGCTTGGTGGAACGANGAAGTCAAAGAAG
CAGTGTCAAGTAAAAAGGAGNCGTATAAAAAATGGNTAAAATCAAAATCA
CGANNAGGATTACGTTAGGTACAGACTAGCNAGAAGAGAAGCAAGAGAAA
AATNAAAAAATCCAAAGANGAATCNTGGANAAAGTATGGTGAACGACGGC
TACCTCAGCAAGAACTCNCCTAGAGANTTCTATAAACGTGTAAAAACGAT
GACAGAAAGAGACGAAAGCTNCAACCCAACANCCGTCATNAACGACAAGA
AAGGCAAACCNNTATTTAGTCCAAAACAGAGGTTAGAAAGATGGGAAGAA
TATTTTNAAGAACTTCTGAACCCNACGGGAAACGTAGATAACAGCAGCTT
CGTACCTCGAGGCTGCGANCANGAGGAACCAAATNTCAACAGCGGAAGTA
AGAGCAGTTATACAGAACAGTCCCAGAAACAAAGCANCNGGTNTNGACGG
AATAACAACAGAAGCGATCCAGGCTTGCGGAGAANTNGGAGTCACCTGGC
TGACNAGAATTTTCAATANAGCNTGGGAAGAAAGAAANGTACCAGTNGAC
TGGCAACAGGCACTTATAGTACCGATNTGGAAAAAAAAGGNAATAAGAGA
GAATGTGAAACATACAGAGGNATATCNCTACTGAGCCACGTAGGGAAAAT
GTATGCCAAANTNCTAGAACAGAGAATTAGACCCATNGTNGAACANCAGC
TGAGTACATCACAATTCGGTTTCAGGAAAGGAAGAGGNTGCACNGACGCA
TTATTCGCNCTAAGACAAGTNTGCGAGAAAGCCATCGAATACGACANCGA
ACTGAACATCGCGTTCGTAGATCAAGAAAAAGCTTTCGATAGAGTAGACA
GAAACGNACTGTGGNNTGTTCTTGAGGACTACGGGGTACAAGGACAGTTA
CTAGANAACATCANAGCCATGTACCANACAAGCGAAAGCGCAGTAAGAAC
ACAAGANGGCATNTCAGATANGTTCACAGTCAACACAGGTGTGAGACAGG
GATGTGTGCTNTCNCCACTTTTATTTAACATCTATATAGACAGAATATCT
AAAGAAGCAAGTTNTGATACAGACGACATAGACCTTTATAATCATGAGGA
AGTACACGCATCAGAAGAAGTAATCGATTCACCCACATTAAACGAACTAC
TATTTGCTGACGACCAGTGCNTGTTCTACCCTGAAGAAGATAGACTGCAA
GACCACATTAACAGGCTAAACTCAGCATGCAGTAAATACAACATGAAGAT
CAATGCAAACAAACCGAAACAATGCAAGTTAGTAGAACCCCTGNCCCACT
ACACATACAGCTGAATGGTTCTGCCCTGAATCAAGTTAGGGAGTTTAAAT
ATCTAGGAAGTATGNTCACAGAAGATGGTAGAATNGACAGAGAAATAGAA
ACNAGATGCCAGAAAGCAAGTGCACTTATATACCAATTGTCACCATTATT
AAGACATCCAAGCATAACTATGAGTGCAAAGAGACAGATTATNAACAGCA
TATTCATTCCAACATTAAGCTACCAGTGCCAAACATGGACACTATCTAAA
GCCCATATACGCAAAATCACCACCTGCGAGATGAGGTGCCTGAGAAAAGC
AGCCAACCTAACCATCCGAGATCGAGTGAATAATGAAACTATCAGGCAAA
TTGTGGGAACGACACCTTGTACTAGATTCATCGAGAAACAGCAGATCAAG
TGGTTTGGCCATCTCGTTAGAATGCAGCAAGATCAAATACCATCACAAGC
ACTACATCTCAGAAGATCAGCTACAAGAGCAAGAGGACGGCCGCGGAAAA
CATGGATCGACAACATTAAAGACACTCTACGCCTTCACGGCATGACAATA
GCCAGTGGCAGCCAACGTGCACTGGATCGCAAATTATTCCTCCCCACGAC
GCTTAACGGCAGAAGTGGTTTATGATGATGATGA
>rnd-1_family-40#Unknown ( RepeatScout Family Size = 2541, Final Multiple Alignment Size = 100, Localized to 1000 out of 1011 contigs )
GAATGGCGCTGCGAGGAGTTACCAGGGGATCTGGCCGACGCTCAACACTC
AGGGAAGGACGAGACGGATATACAATCAGACGGTTACTGGTACCATCGGA
ATTGGAACTCTTCGCTTGCTGCTGAAGATGGGGACNGAGCGCTTATGGGA
GTGTCCCGAGTGCTGTGATGTCGATTCTTAATTCAACATTCAACATT
>rnd-1_family-140#SINE/tRNA-Deu-CR1 ( RepeatScout Family Size = 868, Final Multiple Alignment Size = 100, Localized to 1000 out of 1011 contigs )
AGAACTTTACGTCGTTATTTACTATACTGAGGAGCGGCTGGCCGAACGGT
TAGAACGCTGGGCTCTCANGCGGGAGACCCGGGTTCGAATCCTCGGTAAG
GCTGGGGATTTTTTCTGTCGGGGGCGAAATAAAATCCTCACCTGCACAGT
CGTGGCGACAGCACTAGCCATGCGGCCGTAAATCCTCAGGCTCAAAGACC
CC
>rnd-1_family-168#LINE/I ( RepeatScout Family Size = 648, Final Multiple Alignment Size = 100, Localized to 1000 out of 1011 contigs )
GCAGAGGCCAAAAGAGCAAAGTGGGAANCTTTTGTGAATGANATGGGAGG
CGATAAAACATTGGGGAAATTCTGGAAACTGCAAAGGCAGATGCAAAGAA
AAGATCGGCCTATGACAGTCGGAACAATTTGTAGAGACGATGGTGTGCGT
GTGACAACAGACAAGGAGAAAGGGGAGGCTTTTCTCCATAGGTTTATAGC
TCAGACAGATCATAATGATGTAGACATCAGGGATGCAGTTAGAAAGGAGT
TAGCTGGCACCTTGAAGAATATGCATTATGAAGACATGATACGAGTGGAA
GATATCAAACANATTTTGAAAAAAGCAAAAGACACTGCACCAGGGCCTGA
CGGNGTCAGGTATGGCCACATGAAGGCTTTGAGCGATGTAGACCTGGCGG
AGATGGCCGACTGTTTTAACCAGAGCATTAGGACAGCATCAGTACCGCAG
GACTGGGTGCACAGCTATCTAATCCCACTNCCAAAACCTTTTAAAGATCA
TTCNAAGCTCAGCGGCTTTAGAATCATCACCTTACAAAACACNTTTGGGA
AGGTCTTGGAGAAGATAGTTGCTGTAAAGCTACAAGAATTTTTGGAAAGG
GGGAAGCTTCTCCCAAGAGGTCTGGGAAGTTACNGGCCAGGAAAGGACAC
NTGGNCAAATGCGGCCACTTTTGCTTTTGACGTCTATGAAGGGTTCCAGA
ACAGACAGGAAACTATGGCGGCAGCACTNGATCTCGAGGATGCTTACAAC
AGAGTNAGATACGACATCTTGATGACTGCACTNANGGAGAAGGGGGTCNG
TCCNTGGCTGGTGAACTGGGTNGCAGCTGTCCTGTATTCACGTCGGGTTG
CTCTCCGNCTGGGCTCATGGACCTCAGAACCATGCANTNTGGCCCCAGGA
CTGCCACAGGGATCCGCCATCTCGCCTGTGCTCTTCAACGTGTATACGAG
CAAGATTGCAAGCCTAGAAGCACCAGGAGTTGGAAGGATACTGACNTTTG
CGGATGATGTNCTTGCATATAGGCAGGGGAAGAGAGGGAACAAACAGCCC
GGGAGCTACAGGCGACAGTAGACAAAGTGACTGANTGGTGTACAGAAATG
AGGGCTGTCGTCCACCCGGAAAAGGCGNCTGTTTTGTGGTGTTCTCTGGA
CAACAGAATCGTTAAAGCTAATGTCCCAAGTCTCACGATAGATGGTAGAA
ACGTCAACAGAGAGAGCAAACTGAGGTACCTGGGAATTACATTTGACAGG
AGCCTGTCNTTTAAGGACCATGTGGAGAGTGTTGTGACGAGATGCCAAAA
AGGACTTAGTGCACTTAAGACTATGGCTGCAATTGACATAGAGCAGAGAA
TGCTTTTCACACTATATCAGCACCTGATCCTGTCAGTGGTNGATTATGGC
CTGGGACTGCTTACCGTCTCAAAGAGTCAGATGGACAAACTAGAGCGCAT
ACAGAACGCGGCTATGCGGGTCATTCTGGGTTGCACCAGAGACACCCCGG
TGGTGTGTATGCGATACATCCTTGGTTTGCCGACNGTTGCAGGTAGGCAC
AAGGTGCTGCAGGCGAAGTCATATCTCAGGGTAGCTGCAGACACAGACCA
CCCTCTGCATGAAGCTCTGGGTGCAGTTAAGGGTCAGCGGCTGATAAGAG
GGAGGTCATGGATGGCTCAGGCAGAAGACACAATCAGACAGGTTTGCATC
CTT
>rnd-1_family-280#Unknown ( RepeatScout Family Size = 303, Final Multiple Alignment Size = 100, Localized to 1000 out of 1011 contigs )
TCTCTTNACTACCCCTTGGGCCTGTGATGCTAAACCCCCTGGGACTCAAA
GAGTTAA
>rnd-1_family-208#Unknown ( RepeatScout Family Size = 491, Final Multiple Alignment Size = 100, Localized to 1000 out of 1011 contigs )
TTTGAACAAAGAAGACACAAACAATAGATTGCACAATTTATTGCCTGGCA
TATTTCGCTGTATCTCGTCAGGTGCATACTACAGTAACAATTGAATAAAT
GAAGCAAATAAGTGAATCCTTNAAACTGAAACACAAATTCGACTACATTC
AAACAAACTGCCTGTTTCACCAGGGCAACCGCAAGGCGANGACCATNTCT
TTCTGTCTGCANAGTTCCGGACTNAACCGGCCGATCGCGGAAGCTTCCGC
GAATCTNAGTAATCTACGGTTGGCCGAAGTGTAAATAATTCGAAATGCAT
CGTCCTTGTTTACGATGTGCCCAGANTTTAGAANATGGCGCGCNATTGCT
GATGATGGATTTTGTCGACCAGTCACCTGATTCGTTGTTGTTGAGGTGTT
AGTGT
>rnd-1_family-273#Unknown ( RepeatScout Family Size = 319, Final Multiple Alignment Size = 100, Localized to 1000 out of 1011 contigs )
CAGATAGGCTCAAAGTTCTGCAAGCAAAGTCATATCTCAGAGTAGCTGCA
GACAAGAAGCACCTCCTGCATGAAGCCCTGGGTAGAGCTAAGGGTCACAG
ACTGAAAAGAGGAAGGTCTTGGATGGCGCAAGCTGAAGACA
>rnd-1_family-160#Unknown ( RepeatScout Family Size = 694, Final Multiple Alignment Size = 100, Localized to 1000 out of 1011 contigs )
AATATTATGAATTAATCGAGTAACAGAAAGTATTGTGANCGGCACTCATA
GAAAGAAGTAGAAAGATAGAAGAACACACTAGACAACATAAAAATCGAAA
GCTATAGTTACCGTGCCGGGAATTGAACCTGTCACCTCCAGACGGCGTCT
GCGCCTCGCCATGAATACAAGTGCACTAAGATACATGGTCAACTAGGCAC
CCCCAAAAAAGGTGTCTCATTGGCCATGTCTATCGTACAGCTTGAAATCC
ACGACTATGGAATACGGACAGAATTCATTTCAANCCATTGAAATGGCACC
ATAGGTTACAGAAATTTATATTAACGAAGCANATGTCGAATAACAATCAC
AGCAACAATTTACGAACACAGTAGACCTTANTGCTTTGTCTAGAATACAC
AAACATTTAAGAAAGGTATTTGATTGGTAGGTTCCGGTGTGTATACGTCA
TTCCTATAAATAAACAGAGAGGGGAACCATTTGAGGCCGTTAAATATTAT
GAATTAATCGAGTAACAGAAAGTATTGTGAACGGCACTCATAGAAAGAAG
TAGAAAGATAG
>rnd-1_family-61#LINE/RTE-BovB ( RepeatScout Family Size = 1911, Final Multiple Alignment Size = 100, Localized to 1000 out of 1011 contigs )
GGGGAAAACAAGAATAGACCCACTGCCTCCCCAAAAGCATGTCGTAAGAG
TCGACTAATTGGGGAGCTT
>rnd-1_family-282#Unknown ( RepeatScout Family Size = 301, Final Multiple Alignment Size = 100, Localized to 1000 out of 1011 contigs )
TTAACTCTTTGAGTCCCAAGGAACGCATCATACGTTCATAGGTTCCTACC
TAGAAGCCCAATGAACGCATGAT
>rnd-1_family-231#Unknown ( RepeatScout Family Size = 416, Final Multiple Alignment Size = 100, Localized to 1000 out of 1011 contigs )
GCAGACCAACAAGGCAGATCCCAGATACCCCGTTCAACCTCCAAAGAAGT
TATAATTAGGGCACCCGTAACGGCTACACCAGCCAGGTGTAACCTGCAGT
CCTGTGCGGGTAAG
>rnd-1_family-23#Unknown ( RepeatScout Family Size = 3796, Final Multiple Alignment Size = 100, Localized to 1000 out of 1011 contigs )
TCTTGTTGGATGAAATCAATTCCTTATCATTGCGAATTTTTTGGTAACTG
TTTAAAAGAAGTGGATGAACAACCAGAAGTTTCCGCAAGAGTTTACAGCC
AGTGTTCGCGAAGCAAAGCAAAAGCCAGTTTACAAAAATTAACACAGACC
GTACAACTGCAAATATGCAAAAGAAGTAGATGAACAACCAGAAGTTTCCG
CNAGAGTTTACAGCCAGTGTTCGCGAAGCAGAAGCCAATTCACAAAAATN
AACACAGACCGTACAACTGCAAATATGCATAAGAAGTAGATGAACAACCA
GAAGTTTCCGCNAGAGTTTACAGCCAGTGTTCGCGAAGCAAAGCAAAAGC
CAGTTTACAAAAATTAACAGACCGTAGAACTGCAAATATGCAAAAGAAGT
CGATGAACTACCAGAAGTTTCCGCAAGAGTTTACA
>rnd-1_family-313#Unknown ( RepeatScout Family Size = 245, Final Multiple Alignment Size = 100, Localized to 1000 out of 1011 contigs )
GGGGGGGGGGGGGGGGGGGGGGGGTTATGCCAGACACNGTTAGCTGAGAG
AGCTTAAAACATTATTTTAAAGTTCTCATTTCTTAACTATTTCTATTTTA
ATAATTTCGCCANGTGATGATTTTTCAATCCTTCGGAGAGGGAGATATGA
CTTCGCCAGGTGATGATTTTTCAATCTTTCGGAGAGGGGGATATGATTGG
G
>rnd-1_family-43#Unknown ( RepeatScout Family Size = 2484, Final Multiple Alignment Size = 100, Localized to 1000 out of 1011 contigs )
GAATGTTGAATGTTGAATTAAGAATCGACATCACAGCACTCGGGACACTC
CCATAAGCGCTCCGTCCCCATCTTCAGCAGCAAGCGAAGAGTTCCAATTC
CGATGGTACCAGTAACCGTCTGATTGTATATCCGTCTC
>rnd-1_family-317#Unknown ( RepeatScout Family Size = 242, Final Multiple Alignment Size = 100, Localized to 1000 out of 1011 contigs )
GAACGAATCGCGGCAAAACTAGGATCGGCTCCGNATAACGAAACAAATGC
TCTAACAGGGTCTCAGCGATATGTTAATTGCGGACCTGTTTCTGCGACTA
TGCCTCACCGCCGACNGTATCCC
>rnd-1_family-167#LINE/I ( RepeatScout Family Size = 652, Final Multiple Alignment Size = 100, Localized to 1000 out of 1011 contigs )
GGAGCCATTTACNNTNGGCGAACTACAGAATTGCCATCTCNAGGCTNAAG
NTGAGAAAGTCNCCAGGNNCAGATGGANATCAGCAACGAAATGNTCANNA
ACCTAGGANCANCTGCCAAAGTAAAGCTGCTGCAGATNTTCAACGNCTGC
TGGGCAACAGGGAATGTTCCTCAAATATGGAGAGAAGCAATCACGATACC
CCTCTTAAAGCCNGGGAAAGACAGTTCTAATGCCTCCAGCTATAGACCGA
TCAGTCTCACAAGCTGTCTCTGTAAAACAATGGAACGNATCGTCAACCTC
AGACTGCAATGGTACTTNGAAAGTGAAAACATCTTNACGCCGCAGCAGGC
GGGNTTTAGANAGTGCTACTCCACGGAAGACCAGACAACNTACCTCTCAC
AAGAAATAGAGGATGCCTTCCAAGANAAGAAACTGGTNCTNGCGGCATGG
ATAGATTTNAAGAAAGCTTTTGACAAGGTCTGGAAAGANGGTCTATTGAA
GAAACTGAGAAACTATAGAGTNAATGGAAGNATGTACAAATGGATCAAAG
CATACCTACATAACAGAAGAGCCCGAGTACAGGTAGATGGNCTTAAGAGT
AAAAAAGTTCTACTGCGNCAAGGCGTCCCNCAAGGNGGTGTCCTGTCNCC
CACACTCTTCCTTTTATTTATCAACGACCTGGTTGCTGAAATACCAAATG
GAATCAAAGCGGCAATGTATGCCGACGACCTGGTACTNTGGTGCACCAAT
GAACATGCGACGGTGGCCACAAGAACGCTACAGCGGGCTACAGATGCACT
TGAGGCATGGGCCGATAGATGGTGTGTCAGCATCAACACAGACAAATGTA
GCACCCACACTCTTCACCCTCTCCCCAAAGCAAAAAGCNGGCGCCATCNA
NATAAACGGAATACCCCTGAGAGANGATAAAGAGCCCACATACCTNGGAG
TCACGTTTGATGACAGGTTGACATGGAGAAAACATATCAACAAGGCAGCA
ACCAAAGCCAGGAGGAAGACAGCCATACTAAGAAAACTAAGTGGAACCAC
ATGGGGAGCAGATGGGAAATACTCAANAAAGTNTACAAGCAGAGCGTACG
NCCACACTTGGAATACGGGTCAACTGCATGGTGTTCAGCATCTAGTACCA
CATTAAAGGAGTTAGACAAAGTGCAAAATCAAGCGCTCAGAGTCATCACA
GGAGGGATGAAATCAACCCCCATATTAGAAATGGAGAAAGCTGGGAAAAC
ACAGGCACTGAGAGAACGCAGAGACACAAAGTTGCAAATACAAGCNGAAA
AGTTCCTCAGTATGCCAGATCACCCNATGAAAAANAGATTTAAGAACCTA
GCCTTGGGACGGCTAAAAAGAAGCAGCTTTATNCACCAGGCAAAAAGAAT
ATGTAGACAAACCGCTGACCTNCCAGAAATTGGTTGCCCACTTAAAAGTA
TTCCGGAACGAACCCCATGGAGAGAGAAATGTAAACTAACAGTACAAATC
CAGACAAATGTGAAAGGGATATTTTGACAAGAAAGAGCAAGATAGTGTAC
AACGCAGAACGGCCACCCTCAGTTATATTGATGAAGAATACCCACAAGAA
CAATGGGTCAGAGTCTATACAGATGGGTCCGCAGAAAGTGCAGTTAGAAA
TGGTGGTGCTGGAGTGTACATCGAATTCCCAGATGGTACTAGGGATAAGT
CCAGCGTACCAACCGGGAAGTACTGCCATAACTACGATGCAGAAACTCAG
GCTATCAAGATAGCNACAGAGAAACTGCTAAATACCAATCTTGGCTCACA
GTATGTGGTAATGCTGACAGATGCNAAATCAGTACTTGAAGCACTCCAGT
CTAGGAAACTACCAGAATTGCAAACACTGCTGACACAACTCAGCCTTCAG
CGAAGAGTCGTAATGCAGTGGATACCGTCCCATTGTGGAGTGCCTGGAAA
TGAGAAAGCTGATCAACTGGCAGGGAAGGTGCGACAAAAGAGCAGCCGGA
TGTACCAGTCACATACCACCAAAAGAAAAGAATCATTAAATCGATCAGGA
AACCACCAGCCCCAGCACAAGACGACTATTTTATTATGGACAGACCAGAA
CAAGTCATTATCCTCCGCCTCAGAACAGGGCACAACCGATTACGTAACCA
CATGTACACAAAATTCAAGATAGGCGTATCAGCCATGTGCACCTGTGGAA
AGGTGCCCCAGACAGCAGAGCATGTACTCCAGGACTGCACCGAATTTGAC
ACATTAAGGCAAACCTTTTGGCCAGAAAGAACAACAGTGGAACGTAAACT
CTATGGACCACTGAATGAACTAACAACGACAGTGAAATTTATACAAGAGA
CAAAACTGCTGATATAGACAACTTATTTCAGGCGAACGAAAGAAGAAGAA
GA
>rnd-1_family-352#Unknown ( RepeatScout Family Size = 191, Final Multiple Alignment Size = 100, Localized to 1000 out of 1011 contigs )
TTGTTGTCCGTATCGACATCCTAGCACATCGGTCCGACCCATTCGTGCTC
CGTCCTCCGATGCAGCAGCCATCTCAGTGTCTCCATGCTCANCGTACCCA
GTAGGAGTTGACTGGCATATCTT
>rnd-1_family-179#Unknown ( RepeatScout Family Size = 592, Final Multiple Alignment Size = 100, Localized to 1000 out of 1011 contigs )
GAGTCTGTTACAATTACGACATGTGTGTGCATCTTGTTCTCNAGCCACCG
GAAAGCTGCNGTTACCGCCTCCACCTCCATTCTCATGCTGGATGTTGTGA
TGTCGTA
>rnd-1_family-131#Unknown ( RepeatScout Family Size = 919, Final Multiple Alignment Size = 100, Localized to 1000 out of 1011 contigs )
CCGTTTTCATAATGGGTCGGTGACAGTGTTAACAACAGGGCAAACACAAC
AGGTGTGTTCATTTCTGGGAATCAGGTCAGGCCGGATTTTCTTTTCTTTC
AAAAATGACCTTGGCTCCCATGTCCACCCAGCATTGAATGTAAGAAATGG
ATCTATAGCAGCCACACGCGGACAGCCAAGCATGGGAGGGTTGCCAATGG
GATTTTTGTCAAACCCGAAGCTAAGCTTATGTCGTGAAGTGAACAGCCAA
CCCTACACGNTGGACNAGTCGTGACGTTGACGCCCCTAGCGGGCAGGTCA
CATTTCAAACTTAGACCCGTCCGGAGGGTATATAGTCCCTTATATCGATA
TATACCTTTATCTGGCGAAATAATCATTTCTANACCCTCTAGTTGCTTTG
ANAAGTCTNCATTTTCAAACTTGCAACTGTGGGATAGATATTTTCTGGAG
TATTATTCGGAAATTCCTGGAAACCGGTTTACTCCTTGGGCACGNATACA
AGGGACTTCTTTTCTAGCGACGCCAAGCGNGATCTGGCCGGGCATTCTTT
GCCNGACTTCCNAGGCGTCCAGACGTGTNTCACCTCTCTGATTAAATTTT
GGCGCATTCAAAGTGCCAGTTTAATCTTTGAAGGATTCCTAAGCTTGGGT
AAGTTGATTATAGTTTACGAGTACCATGATATATGTCTCTNTAAAGTTGG
CCACTGCTGCAGAGAGGNCAGANTCGGCTGTGTGATCGCACAGAGTTCGA
CCGTTCTTGATGTCCAGAGAANCGGGCTCCGAACTTAGACCTTCCCCTGT
ACAGACTAAATAGTTTGTGCCCTACATAACCCACACCATTGTAAANATAT
TAAACCCAGCAAGTTAATTATTCTCTAACCAGACGACGGAGTTTGTGCCG
ANTAGCGGACANATTTAACTGGGTCACACTTCAGCCGGCTAGGCGCTGTG
ACGTCAGAGGTTNTTTTTAGCACA
>rnd-1_family-229#LINE/RTE-BovB ( RepeatScout Family Size = 418, Final Multiple Alignment Size = 100, Localized to 1000 out of 1011 contigs )
AACAAAAACAAGACATGCAGTGGACTAAACACTTCTCCGACCTCTTGAAC
AGACCTGATCCTGAAAATCCCCCAGATATTCAACCAGCCTCTCAGGACAT
TGACATTATTACTGAACCACCAAGCAAACAAGAAATCCTTAAAGCTATCC
ACACTTTAAAGAACAACAAAGCACCAGGCAAAGACGAACTGCCAGCAGAA
CTTCTCAAAGTAGATCCCAACACAACTGCTAGCATTCTAGAACCATTGTT
CAAGGATATTTGGGAAAAAGAAGTGTTGCCTGATGACTGGACTGAAGGAA
CAATAGTCAAAATCCCCAAAAAAGGAGACTTAACAGACTGCAATAATTGG
AGGGGAATTACTCTACTCTCAGTACCAAGCAAAATATTTTGTAAAATCAT
CATAATGCGGCTTGAAAAAGGAGTAGATAAATGCCTACGAGTGGAACAAG
CAGGATTCAGAAAGGGCAGAGGAACAACTGAGCACATCTTCGCCATACGT
AACATTTTAGAACAATGCAACGAATGGCAGAGAAGTATATATATTAATTT
TGTGGACTTTGAGAAAGCTTTTGACAGCGTCCATAGAGACGGTCTGTGGA
AAATTTTACGACATTATGGAATTCCAGAAAAAATAGTCAACATAATTGCT
CTCTTCTATAAAGACTTTTCCTGCAGTATAAAAAATTACAATACATCTTT
CCCAGTAAAGACGGGTGTAAGACAGGGATGTGTTATGTCATCTCTCCTCT
TCAACCTTGTGATTGATTGGATACTAAAGAACACAGTAGACAGGACATTG
AGAGGCATACGATGGACTCCATTCACCATGCTTGAGGACCTTGATTTTGC
AGATGATATAGCACTCCTATCACATAAACATGAACATATACAAGAGAAAA
GTAACAGACTACACNGCACAGCAGAAATGGTGGGACTGAGAATAAATACA
AAGAAAACTAAGATCATGACAAACAGTCCAAACCAACAACCAGTGACCAT
AAGTAACCAANCACTTGAAAATGTAGAACATTTCACATATCTTGGCAGTG
TGGTGTCCCTACTGGGAGGGACAGAGGAAGACATACAGTCACGTCTGAAC
AAAGCTAGAGCTGCTTTTGGAAGGATGAGGCAAATCTGGAAATCCAACAA
TTACTGCAGAGGAACGAAACTCCGACTCTACAAGAGCATCATTTTGCCAG
TTCTTCTTTATGGAGCGGAATGCTGGAGAATGACCAAAAAGGATGCACAC
AAGCTGTCCACCTTCCACCACACATGTCTACGTAGAATTATCAAAATTTT
CTGGCCAGATACAATCTCAAACACTAAACTACTTCAAGTCACAAACCAAG
AAACTTTAGACAGTATGATAACCAAGAGAAGATGGAAATGGCTTGGCCAC
GTTATGAGAATGAATCCTGATATACCTGCCAAAACAGCTCTCACATGGAC
ACCAGAGGGAAAGAGAAAACAGGGGCGCCCAAAAACAACATGGAGACGAA
CGATGGAAAGTGACCTGAGTGCGGCATCTTTGACATGGAAAACTGCACTG
AAGATTGCACAGGACAGGAAAGCATGGAAAGTCCTCTCTGAAGCCTCATG
TGCCACTAGGCATAACGAGAACTGATGATGATGAT
>rnd-1_family-109#Unknown ( RepeatScout Family Size = 1081, Final Multiple Alignment Size = 100, Localized to 1000 out of 1011 contigs )
GGAGCCGCCGTGGTGTAGCGGCTAGACGCTCGCCTGCGGATCGGAAGGTC
GTGGGTTCA
>rnd-1_family-405#Unknown ( RepeatScout Family Size = 137, Final Multiple Alignment Size = 100, Localized to 1000 out of 1011 contigs )
CAAAAAATATCCTAACGGGGCCTCAGTCGTATGTAAAATGCGGACTTCCT
GCCGAGGAACAAATCGCGGCAAAACTAGGATTACTTGACAATTTCAAGAG
AC
>rnd-1_family-365#LINE/RTE-BovB ( RepeatScout Family Size = 176, Final Multiple Alignment Size = 100, Localized to 1000 out of 1011 contigs )
TCAGGCGATCATTCNCTGGACGCAGAACTAAACANACGNATAGGAAAGGC
CTCTGCAATGTTTGCAGATCTGACAAAGAGAGTTTGGGAGAACAGAAAGC
TCACAATTAAAACAAAAACCCTTGTCTATCAGGCTTGTGTTCTCAGCACT
CTGCTTTACGGCAGCGAAACCTGGACTCTCTATGCTCCACAGGAGAGANG
GCTGAATAGCTTTCACATGCGNTGCCTGAGAAGAATNCTTGGTACATTAA
GTGGCGGGACNANGTCNCNAACGANTGTGTACTGGAAAGAGCAGGAATAC
CAACAGTNTNTTCTATGCTGAAGCAAAGACGNCTGCGNTGGCTGGGNCAC
GTCTCNCGCATGGAGGATGGTCGNATTCCNAAGGACNTCCTNTATGGTGA
ATTGGNAACAGGGAGAAGATCTNCAGGAAGGCCAANGCTACGCTATAAAG
ACGTATGCAAACGNGACCTAATAGATACCAACATAGGCACAGAGACNTGG
GAAAAATCAGCTGCAGACCGACTNCTATGGAGGCAGAAAGTGAAAGACGG
ACTGTCGCANTTTGAAAGAAGCCGAACGCAGCGAGCTATAGAGAGGAGAC
GCCGGAGAGAAAACCAGCCTCANAACGAGGGAGTATCTGCTTTTGTGTGT
ATCCTGTGTGGCAGAGACTGCCACTCCCGCATCGGACTTTACAGTCACAG
CAGACGCTGTTCCCAAAGCCAGCGGCACANCTCCATGGTCCCCAGGGACT
GACGGNTGCCATT
>rnd-1_family-402#LINE ( RepeatScout Family Size = 139, Final Multiple Alignment Size = 100, Localized to 1000 out of 1011 contigs )
CAAGAGGTCTGGGNAGTTACCGGCCAGGGAAGGACACNTGGTCAAATGCG
GCCACTTTTGCTTTTGACGTCTATGAGGGGTTCCAGAACAGACAGGAGAC
GGTGGCGGCAGCACTNGATCTCGAGGATGCCTACAACAGAGTCAGATACG
ACATCTTGATGNCTGCACTNATGGAGAAGGGGGTCNGTCCNTGGCTGGTG
AACTGGGT
>rnd-1_family-340#LINE/RTE-BovB ( RepeatScout Family Size = 203, Final Multiple Alignment Size = 100, Localized to 1000 out of 1011 contigs )
ATTTTACGAATTAGTTATTTAGAACACAAAACTAATAAATATGTCAGAGA
CAAAATATACAAATTTGCAGGACATCAGGAGCCTCTCTTGGCAGTGGTGA
AACGTCGCAAGCTAGCTTGGTTCGGGCACGTGGTGAGACATGATTCGATT
GCAAAGACTGTACTTCAAGGAACATTGGGGGGTAGTCGAAGAAGAGGAGG
GCAAAGAAGAACCTGGAATGACAACATCAAGAAATGGACAGGACTAAGTT
ATCATACACTTATTCATCAAGCGGAAGACAGAGAAAGATGGCGGGTTTTA
TGTGCTAGTGCTTCCATCGATACACCTCCACGACCCTAACGGGTCAAGGG
TTATGTTATGTTAT
>rnd-1_family-18#LINE/RTE-BovB ( RepeatScout Family Size = 3953, Final Multiple Alignment Size = 100, Localized to 1000 out of 1011 contigs )
GTGTGTGTGTGTGTGTGTGTGTGTGTGAGAGAGAGAGAGAGAGAGAGAGA
GAGAGAGAGATCATGCATTTTTCGTTCTTTCAGGGTGTCTTCGCCCAAAT
CAAATTTGAAGATATTGCTAACGAGAATATGAAGGTGCGTTTAAATTACA
TCGAACGAACGGCCGAGCGACCGANAGGTTTTGAAAGAGGCGGGAGCCCG
AAGACAACTAATCACAGACATCAGAAGGAGACAGTCATCATTTTTCGGCC
ATGTTATGAGAAGAGGGAAAATGGAACATGTGGTGACCACTGGAAAGATC
TGTGGAAGGAGGGATAGAGGAAGACAACGAGAGAAGATTCTTGACAGTCT
TGTTGCATGGCATGGAGGTGTGTCAGCACACGAACTGATACATGCTGCAG
GAGATCGCAGATTGTGGCGAGGCATAATCGCCCACGCCAGTCGGCAAGGC
ACCTGATGATGATGATACACTATTCGTATTCGGCCGAATAGTTGGTCCCG
CTATTCGTATTCGGCCGAATAGTGAAAATCACTATTCGGTACAGCCCT
>rnd-1_family-151#LINE/I ( RepeatScout Family Size = 779, Final Multiple Alignment Size = 100, Localized to 1000 out of 1011 contigs )
CGGTACGCTTTTTCGTCCGTTGAGGCGAATGGCGCAAATTAGCTATTTTC
GCTCACGTATAATGTGAAAGTTTCATCGGAATGGGGTCTGAACCGTGCAA
TGGAGTACATGCACGTGAGTTTAGACTTCCCTCAGGGTGTATTCGACGTC
CGATGGCGACTATTTACCAATTCAAAACAACCCGTAGACGGACAAGGAGA
ACGCGAACAGGCAAGCACGGTGGCGCCTGCAGGAAGCGACTGAAATGTGA
GAGACTCAGCTTAAAGTATGTTCGCGTTCTCTACTGGAACTGCGCTTCGT
TCAGTCAACGCCGACCCATTTTCGAGAAGCTCCTCTACAGCAACGACATT
GTTGTCCTACAGGAAACACACCTCGGTGACGAGATCGTTAAAATTGCGGG
CTTCCAATCCTTCTACAATAGACGGCACCTCGGACAGCTCATTCTTGTTC
GTGACCACATACCGGTGTCTGAGGTGGACATGTCTGAGTGGAATAATGAC
GACCTACAAGTACACGCAGTCAGAGTGATGGGCCCGGCCCAGTTTGTGAT
TGTCAATGTGTACGCCTGCAATGGAAAGGTGGATACAGCGAAATGGCAGA
GTTTGCTCCAGACGGAGGAAAAGAAAGTCCTTTACTGCGGAGATTTCAAC
GCCAGAGGACACCAGTGGGGCAATGTAATCACCAATAAACAGGGGGAAGA
CCTGGAGGATGCCCTAGTGTCTGCCGATCTAGTATGCTTGAACGACGGAA
AGGTTACCCGAATGGCAACACGACAAGGGGATTCTGACAGCGTAATTGAC
CTGGCCCTAGTGTCTCCCTCCATTGCATCAGGATGCAGGTGGAGCACACT
GGGATACCACGACAGTGATCACTTTCCTTGCGTCGTCCTGGTAGAGAAGA
GCAACAACAAAGGTCATGTAATCAATGTGCCTGCTTTTATATATGACCGT
ACAGGGCAAGATGCCATTAGCAAAATCCGACGACGTAAAACAAGAGCAGA
TCGCAGACGGCGGGAGAGATGGGCCCAGCCACCATGGTGGAATGAAGTAG
TCAACATGGCGTGGCTAGAAAAAAGGAAAGCTGTCAAGGCATGGCAAAAG
GCAAGGAAAATTGATCCGTCACTTTCTGAACGCCTGATCAGTCTGAAAGA
TGAGGTCAACAAGCGGACAGTGGCTTTCAAGTTAATTGCGAAGGAAGCCA
AGACAGCGAAATGGAACGAATTCTGCAAGAGCGTTTGCTCCGAGGGATCT
CTTGTGACATTCTGGCGCCTTCAACGGAGCATGCACGGCGCCGCACGACC
AAGGGGTATCCCTGATTTTCAGGGTACAGACCTGATATGGCAGAGAACTG
ATGCTGATAAAGGAAAAACCCTTCTGGCGCGCTACTTGGAGCAAACTGAC
CAAAAAGACGAAGCTGCAAGAATAGGGGTTAAGATGAAACTGTCGATGCT
GTGCGAGAACACTGTGCTAGGCACTGATCTCACAATCACTGCAGATACCT
TAAGAACTTGCCTCAAGAAATCGCGCAGCACTGCTCCAGGCCCTGACGGC
ATCCGATACAACGACATGCTGATGATGTCGAATGCTGATTTGAAAAGCGT
GGCAAAGGAATTCAATATCAGCATCCAGAGTGGCCAGATACAAGAGGAAT
GGCTCCATAGTTATTTGTTCCCACTACCAAAGCCTAATAAAGACCACTCG
AAGATCTGCGGCTACAGAATCATCTCGATGCAGAATACTGTTGGCAAACT
TTTTGGAAAAAATTGTCGCACAAAGATTGACCACCTACTTGGAACTACAT
GATAAGTTCCCACCAACACTTGGAGGGTACAGGTTGAANAAAGAGACATG
GTTCAATGCTGCAGTTTTCGCCTACGATGTGTACGAGGGATTTCAGATTA
AAGAAGAGACATGTGCGGCAGTGTTGGACTTAGAAGATGCCTACAATAAA
GTACCATACGATTATTTAATGCAATTACTGCTTAAACTAGAAGTCAATCC
TATTCTGATCCGCTGGATTGCTGCGGTCCTGTTCCAGAGAAAGATTGTAC
TAAGATGTGGTAGCTGGTCCTCAGAACCGCAAACGATATGTCCAGGCTTG
CCACAGGGATCACCGCTATCACCAGTCTTATTCAACGTTTATACGGTGAT
GATCACTGAGCAGCAGTTGAATGGAAAGGGAAGGACTTTGTCATTTGCTG
ATGACATTTTGATTTATCGACGAGGGCGTGATAGACAGGAGATCGCCAGC
ACNATGCACAAAGAACTCGATCGAATTGCCGCCTGGTGTGATGGTTCCAA
TGCCTATGTCAATCCTTCGAAGGCATCAGTGTCATGGTTCTCTTTGAACA
ATCACATTGTCAAGTCGGACTTACCAGAAGTGAAAATGCGTGATAATGTA
TTGATCAGAACCAACGTTATGACGTTTCTCGGGGTGAGGTTCGATCGCAG
CTTGTCATTCAGGGAACACGTTGACCATGTGATAACAAAAGCACGCAAAG
GTCTATCTGCAATGAGGATTATGGCTGCTTCCAATATCGAGCAAAGACTA
CTAATACTTCTATTCTACGGTCTGGTCCTTTCCCCCATTGAATACGCTCT
GGCCATCCTCACTGTCAGTGCTACCCAGATTGAACGACTCGAAAAGGTGC
AAAATGAAGCCATGCGCATTATTTTGGGATGTACNAGAGACACATCCTGT
GGAGCAATGAGGTATCTACTTGACTTTCCAACAATGAACCAAAGGATCAG
GATGTGGAGGGCTCGGGCATACCTCAAAATATGCGCTGATAAGAAACACC
CACTGCATCAAGCGCTTTTTAGTGAAAAGGGCGACAGACTGAAGAGGGGG
AAATCGTGGCTAGGTCGGGCAGAAGATGTTATTAGGCAAATATGCAGCCT
AACCGACATCATACCTGGTGCAGAATGGATACCTGTGCCTCAGGCGTTTA
TTTGTACATTTTCCTGTATTGTCACACTCAACAGGCGATGTAGAGAAGAG
AATCCTGTTGCTGTTAATGCAGAGGTCAACGCTCTCATCGGTGAAAATTC
AGACGAAGCAGATGCAATAATCTATACAGACGGATCCGTTATACGCCAAA
GAAGAAGCGCATGGGCATTTACAGCACGCTCAGCGGGCAGAACAGTCAAA
GAAGCCAACGGCGCCTTCTCCATGACAACCAGCAGCATGACGATGGAGGT
GATGGCAGTGACGCAAGCGCTTGCCTGGCTTGAAACACAAAAATACACCC
GCGTGTGTATACTCAGTGATTCAATGAGTATGATCCGGAGGGTTCAGGCA
GGTTCAGTGCGAAGACAATGGCTTGAATCATTACAGAAGTCCACTGTGCG
TGGAGTCACCTTTATTTTTGTTCCGGGA
>rnd-1_family-19#SINE/tRNA ( RepeatScout Family Size = 3879, Final Multiple Alignment Size = 100, Localized to 1000 out of 1011 contigs )
TCCCAGGTCGACCCAGCCTTGAGTGGGTACCAGGTGCAGTCCTGGGAAGT
AAAGGCGGCCGGCGTGATGCTGACCACAT
>rnd-1_family-324#Unknown ( RepeatScout Family Size = 223, Final Multiple Alignment Size = 100, Localized to 1000 out of 1011 contigs )
TGTCGCGCGCCCACGTGGGTAAATACACTGATATAGTGAGGGTGTGGGTT
TGAACCTTAACAATGCCCACCCACGTGAGAAACTGGACTATTATCTAAGC
TATGTTGATCCTAGACAGTCCTGGATAGCCAAGAAAACAGCGAGTGGCTC
GTTCCATGAAATGAAAGTTGCTGTACTTGTATCCACAGGAGTAGGAGAAG
GGATAGATAGATATCNGGATANACCCACTGTGATATNATCCAGGTGCNCA
GTTAACCCCTCCGACTGNTCTCCTCTCCTGGCATTACTTAAAAGCCCCCA
TCAAGTGATTTAAATATTTGTTAGCTGAAGTAAACTAATATGCACAAAGA
CACTTGAACCTAAGTACACAATTTACTCAACTATGTTGTAACAACATCAA
AAAGATTTATTTGAATAAATCGAAATTAAAATGAACTTGTTTAGGCTAGT
AGAGTTGGGATGATGTTANTGATGANATCATAAAGGTATTGGAAAGTAAC
AACCTTTGGACAGTTCTCGGCTTGAGACCCTGCCTATCTTTTCCAGTTTG
TCGTCCTCACTGCTTTCTGCAGGTCGTTACACTCGACGGTCGGCAAATAA
TGGATGCCTACTAGTCCCTGCCCAATGTGGGAACTGGAGAATGAAGAAAC
AAGCGCATATTTGTAGTATCTGCTCTAGATGTACACTAAGCATGTATATT
ATACTAACATCAAGCATGTTTATTTAAATAAAACATTTCATCTCTCCCTC
ATGCTCACATTCACTCCTGTCCAATTTGGAAGGGCTTATGTCTCACATTC
CAACTGTTACATCTTCTGCCTTCCTCTACACGTCCTGTAATGATAGTCAA
GTCTTCTACGTCAGGTGCCATCTCTCGTACAGACTCAAAATGACAATCAG
TCAGACAGAACCAGTTCTGGAATCTATGCTTGGAACAATCGACGCGCCCA
GAATGCTAACAATANTTCTGGGGCGAATCAAATAACAAATCTCGTGGATT
TACTCTCCGGGATCAATCTCCGCATTAGCCTCCCGAGAGTTAAACACATT
TCAGTGTGTTAGCTGTATGTAATACAGATTCACATTAACCACACGTGAAA
AGATTGCCAAAGTTATCTTCACGCTTGTGATTTCAAAAACATGATAGTTC
ATTAAATTTCAATGGCAACAACAACATTTAGGTTTTACAACATTGAAACA
CATGTGCACGAAAAAACATTCATGACACTATCAAATAGGANATAAAGCAA
TGTGACAGTGCCCTACGAGAATGAAGAAATGTCCGCCTAGGAGTACTACA
AAGTGATGAAGACACACACTTGAGCAAAAAGACAGTTAGATCTCTATCAT
AAAATATAGATTTGAACCTAATTTCGATCTTACCTGGAAAAATGAAACCA
CGATGCCAAAAGTTCTGTCTCAAGCTTAGGTTAAGCCCAACAGATGGCAT
GTGCTGGACAGGATCTCATTTACCAGACCTAGAGTTCACCCCTTTATAAC
TTTTATCAAGCTCCTCCTACATTACGCCTAAAATCATTCTCATTCAAGGA
TGTCACAGCTCCTCCCCTGTGGGTAAGTTTATTCGCTGTCAGTCAGGGCT
GTACAACACTTGTTTGAATTCCCACGCTAGGATTCTCCTGGTTCAATTAA
GCTGGTCAGAGCTAATAGGCCAAGTCACACCTCCGGTCTACTTCACCTGT
CATCACAATAAAATCCGACTTTGTCAATTCTTCTGCCAACACTTTCNGCT
CACCGTGTCAATAGTGACCGTCGGACCNGCACTCNAGTTTAGGTAACCTC
AGGGGGAGATAATCGCAATTAGCCCGNGTTATCTGCTCCTGAAGGTCTGG
CTAGGAGATAAATATCTGACACCAACAAATGGTGTGCAAATCTCCAGTCA
GTAAGTCTGCTTGGTCAGTCTTATCTCTGTACCTTAACACTTAACATCTG
GGAAAAAGTTTTAGTGTTTGATATGACCAACGGTCCAGGAGAATTAAAGG
TTTGATGTGGTCGTCTTACTTAGATTAAGGATGTATCCAAATCCCTATTT
TCCTGTATACTTTCAAAATACAAAGAAATAAAAGTAGGTTGAGGAAAGAC
ATTCTGAAGTCACCGAGCGTATTGTCACA
>rnd-1_family-387#Unknown ( RepeatScout Family Size = 155, Final Multiple Alignment Size = 100, Localized to 1000 out of 1011 contigs )
GGCNCTCCTTTGAATCGTTCCCCAAAATGGCGGCATGCCACATTCTGGCC
ATAAAATATCCAAAAATATCCGAACACGGGGCTCAGTCGTATNTAAAATA
CGGACTTTCTGCCAAGGAACAAATCGCGGCAAAACTAGGATTACTTGACA
ATTTCAAGAGACGCAACATTGCACACGGATAGTAGCAGACGATAAATACC
GACCGTTGACAAATTTCGAGCGTTTCTGCAGACGA
>rnd-1_family-367#Unknown ( RepeatScout Family Size = 175, Final Multiple Alignment Size = 100, Localized to 1000 out of 1011 contigs )
GGGCCGGGAGTGCAGAGAGTGGCCAGCGGGTGCTACGGAGGTGGAAGTCC
AACAGTTGATTC
>rnd-1_family-244#LINE/RTE-BovB ( RepeatScout Family Size = 385, Final Multiple Alignment Size = 100, Localized to 1000 out of 1011 contigs )
TTTTGGACATGTTATGAGAAGGAATGGACTCGAGAACTTGGTAACAACTG
GCAAGATTGATGGAAAGAGAGCAAGAGGAAGGCAAAGAGATAAAT
>rnd-1_family-12#SINE/tRNA ( RepeatScout Family Size = 4774, Final Multiple Alignment Size = 100, Localized to 1000 out of 1011 contigs )
GCGGCGTCCGTGGCTAAGGCGTTGCGAGTCCGACTCGTAAGCCAGCGTAC
CGCGATCGAAACCCACTGCNGGCTGCGTGGATTTTTATCGTGGTATGGGA
CGTCGCAGGTCGACCCAGCCTAAAATGGGTACCAGGATGGGCTGTCCTGG
GAAAGTAAAGACGGCCGGCGTAATGCTGACCACATTACCCACNGAGTGCT
GATGGTCTGTAAAAATATGGGACGCTCTGCCCATATGCCCGATGCGCCNA
AAGGCGTGAAAAGGGATCTTTACTTTTTTTTTTT
>rnd-1_family-228#Unknown ( RepeatScout Family Size = 420, Final Multiple Alignment Size = 100, Localized to 1000 out of 1011 contigs )
GAACTGGTGGTGCCTTATGCGATTAATCGCGTGTGCAACTACTGATCTGT
TGTAACTGCTGCTTCCATCGACGATGAACTGCATTTCTAGTG
>rnd-1_family-326#LINE ( RepeatScout Family Size = 221, Final Multiple Alignment Size = 100, Localized to 1000 out of 1011 contigs )
AGTCAGATACGATATCTTGATGNCTGCACTNATGGAGAAGGGGGTCNGTC
CNTGGCTGGTGAACTGGATNGCAGCTGTCCTGTATTCACGTCGGGTTGCT
CTCCGCCTGGGTTCATGGACCTCAGAACCATGCANTATNGCCCCGGGACT
GCCACAGGGATCCGCAATTTCGCCNGTGCTCTTCAACGTGTATACGAGCA
AGATTGCAGGCCTNGAAGCACCAGGNGTTGGAAGGATATTGACATTTGCG
GATGATGTTCTTGCATATAGGCAGGGGGAAGAGAGGGAACAAACAGCCCG
GGAGCTACAGGCGACAGTAGACAAAGTGACTGACTGGTGTACAGAAATGA
GTGCTGTCGT
>rnd-1_family-232#LINE/RTE-BovB ( RepeatScout Family Size = 412, Final Multiple Alignment Size = 100, Localized to 1000 out of 1011 contigs )
AAGGCAAGAGAGCAAGAGGTAGACAACGATACAAGTGGGAGGACAACATC
AAGAGATGGACGAACAGCAGTCTGAGAGAGTGTACAACCAGGACAAGAGA

>rnd-1_family-48#Unknown ( RepeatScout Family Size = 2402, Final Multiple Alignment Size = 100, Localized to 1000 out of 1011 contigs )
GAATGTTGAATTAAGAATCGACATCACAGCACTCGGGACACTCCCATAAG
TGCTCAGTCCCCATCTTCAGCAGCAAGCGAAGAGTTCCAATTCCGATGGT
ACCAGTAACCGTCTGATTGTATATCCGTCTCATCCTTCCCCTGAGTGTTG
AGCGTCGGCCAGATCCCCTGGTAACTCCTAATAATTAGAGAATAAAGCAT
TTATAACAGATTTTTAGACTCNTTTTCCTAATTTTATCCTTGCATCTACA
TCAATTTCTTGAATCGTTTTCTCTCAGGAAAAAAAGTGCGTTAAAACATG
ATTTAGTGACGGTTACAAGTGTCCTAATTATAACTTTTCCTTGCAGGTTG
ACAAGGTAACTGGGCTACCATAAACATTGATACATTTTAGTCCTGCGGTG
TCAAAACTTTCAGGTTGATTTGGTCTGCCGTCAAGATTTCCAACCNTTGG
GTGTCGAACGTTTCAGGAAACAACTCGGAGGGGATAAACGTCCCGCACGT
ACGCACGCGAATAAGACATCATTTTGCAAGACAACCTANCGTTTAAAAGT
GTTGTTTACAGGCAAAGATTTTTTTTTAATACAAATAAAATTNTATCATT
TGAAATTATGTCTATCNCTGAAGCGCTGAAAAGCAATGAAACGGATAGAT
CGGAAACGGCATACTCACAATCACTATTATTGACAGGTATGGTACCTGAC
TCTTACATTGAGGCATGGAGACTTATAGTTGGCNCGGTTTTGCCTGGACC
AATCAGTGCCATTGGTATTATCGTCAACATAATGAACATGATTATATTTT
ATAAACAAGGTCTAAACTCCTCTATTAATATTAGTTTCTTCGCTATAGCT
GTGTCAGATCTCGGCGGTGCAGTTTTTCAACAGCTAACTAACGTCTTTAA
TTACCCCTGGTTTCTGAACTTGGATTTACCCATTGTGTACCACGAGTTTC
AGTACATGATTACAGCNNTAGTGCGGGAGTATTTTGCAAAGATAACATTT
TTTCTCACAGTTCATGTCACAGCCGAGAGATGTTTCTGTATAGTTTTTCC
TTTACACGTAAAGCGGATGATCACGCCTCTTAGGACCACAATAGTAATCA
TTTTTGTGTGCATTGGGATAAGTATCTTTTTAGTTTTAGTATACACTTTA
TGTTACTTTGACTGGAAATTCTACCCAAGTATGAACAGAACTATCCTTGG
CATGGTGTGTTTAAAAGAAACAGTTTTAATTGAAGCTGGTGGGTNCCTTT
TTCTAACCATAATTTTTANTGTGGCCTTTATTACTGTNGTATTTTTAACC
TGTGTTTTAATATACAAACTACAGAGAAAAAGCTCTTGGCTGAAAACGAC
CAATGATATCATGGGTAAGTCAGGAAGCATGTCGAGCAGAGACAGAGGAA
CGATACTTATGGTGATTCTGATCGCGAGTGTTTTGATCATTTGTTATTTA
CCATCTGTTGTTATATCTGGTGTGACCCTGTTTGTACCTGAGTTTAATAT
CAGGGGTAGATATTATAAACTGTATTGTTGTTTGTGGTCAATTGGCATGT
TATTGGAGAACGTCAACTCTAGCNTCAACATTGTTTTTTACTATAAAATG
AGTACACAATACCGGCAGATATTTCGAGAACTTTATTTAAATAAGCTCTG
CCACTCAAGACTATGACAAGTTTTGGTAGAACTGTGTGANATTAAANAGA
ACAATGTGTGTATTGCTNTTANTAAACTGACATNTAGTGCCTGCCAGACA
GAGTTCCTAATGCACCTGTAAAACCGCAAAATTACATCTTTCAATTCNAA
TTTCGTGACGCGTTATTTATTNCACATTATTAGGGTATGAAGAGAAGAAT
TTGTTTTTCTTCTGTGTCTGTTCCTCTAAATCTTAGTAATCATTGCTCAA
AAGATATTTAATATAAANGTTGAGATGTGAAGTGTAGAGTNTATATATCN
TATNTGAAGTTTGCACTGCAATTTTAATAGT
>rnd-1_family-299#LINE/I ( RepeatScout Family Size = 265, Final Multiple Alignment Size = 100, Localized to 1000 out of 1011 contigs )
AGTTCCCGGAAATGAGAAAGCTGATAAACTAGCNGAGGAAGGTGCGACCG
AAGAACAGCCTGACGTACCAGTCTCTTATCAACAGAAGAAGAGAATNATC
AAATCGATCAGAAAGCCACCAAAACCGGCACAAGACGATTACCATATTAT
GGACAGACCAGAGCAAGTCATTATCCTNCGCCTCAGAACAGGGCACAATC
GACTTCGCAGCCACATGTACACAAAATTTAAGATNGGCGAATCAGCCATG
TGCAC
>rnd-1_family-87#LINE/RTE-BovB ( RepeatScout Family Size = 1363, Final Multiple Alignment Size = 100, Localized to 1000 out of 1011 contigs )
ACTAGGGCTGTACCGAATATTCGCTTCGTATTCGCTTCGGGGCCGAATAG
TGGACCTATTGACTATTCGGTATTCGGCCGAATAGTTGCGGTCGGGCCGA
ATACGAATAGTAGTTACCTTACACCCGCTTCTGCATACACGGCCTTAATG
CTGACAACATGGAACGATTGGTTTTGTTGAAAGCTAATGCAGCTTTCATG
CATTAACTAAGCTGTCAGTGACAATTTCCAAGTTTAGTTACTTGTTATAA
TACTTAGGATTCTTTCATTCCTAGTTATTAGTTACCACAGACTGACTGAA
GGATGCAAAACATAAAATGTTTTTAAATGTTTACTATTCTGTACGAATAC
TAACTAGACATGGAAAGAATATAAACTCCGGCCACATCCAAGTCGATAAT
ATGAAAATCAAACGAACGGAAACATATAAGTACTTGGGTGCAAACTTCAA
CTGCTCCAACATGCTGAGAGAAGAAATACAATCTAGAATACAATCTAGAA
ATAAAGTATACTATGCCCTTCAACATCTGCTAAAGTCAAAGTGTCTGTCT
CGCAACACCAAGATCAAAATATATAAAACGTTGATAAGACCAGTCGTTTT
ATATGGCTCTGAAACTTGAAGCANAANTAAAAGAGATGAGGCCTTATTAC
AGGTTTTCGAAAACAGTCTTACGACGAATCTTTGGACCCATCAAAGATGC
NAACAGCGGGGAATGGAGAGTGAGAAGCAACAACGNAACNCATAATCTGT
TTAAATCACCATTGATCACTGGCATCATGAGAGCTAACAGACTGAAATGG
TTGGGGCATATTGAAAGAATGTCAGATGACAGAGAAGTAAAAACTGTATA
CACCTGAGAGAGGAATGGNCGTAGACCACGAGGCAGACNAAGAAGAAGNT
NGAGAGATAATGTCCAGNCAGACCTGCAAACANCTGGTGTCACNAACTGN
GAAGAGAAGGCCAGCCAGAGAGATGAATGGAGGCGGGTGATATCTGCAGC
AGTGAACCTCAAGGGCTCGGAATGCTGAAGAAGAAGATGA
>rnd-1_family-60#Unknown ( RepeatScout Family Size = 1939, Final Multiple Alignment Size = 100, Localized to 1000 out of 1011 contigs )
CTTCGTAATGCCGAGGTGCCGGGTTCGATCCCAGCTGCAGGCGATTTGGC
AGCAGACCGCCTTGCGTTGGTTTCGACAGTGGTATCGAGAGCCGACCGTT

>rnd-1_family-191#Unknown ( RepeatScout Family Size = 535, Final Multiple Alignment Size = 100, Localized to 1000 out of 1011 contigs )
TCTCTCTCTCTCTCTCTCTCTCTCTCTCTCTCTCTCTCTCTCTCTCTCTC
TCTGCAGAACGGCTAGCCGCCTGCCGAGAGCGTCGCACAAAGCACGANCT
CCGTAGCTCCGGCGACGATC
>rnd-1_family-262#RC/Helitron ( RepeatScout Family Size = 351, Final Multiple Alignment Size = 100, Localized to 1000 out of 1011 contigs )
GGGGGGGGGGGTTGATGCCAGACACNGTTAGCTGAGAGAGCTTAAAACAT
TATTTTAAAGTTCTCATTTCTTAACTATTTCTATTTTAATAATTTCGCCA
NGTGATGATTTTTCAATCCTTCGGAGAGGGAGATATGACTGGGTGAGGGA
GAGGGAGAAGAGGGGGGGGGGGGGGGGTTATGNCAGACACTGTTAGCTGA
GAGAGCTACTATTTTTTCTTTTCTTTTCCATTTCACCATTCTGGGCCACA
GCAACGCGTGGCNGGGCACAGCTAGT
>rnd-1_family-420#Unknown ( RepeatScout Family Size = 126, Final Multiple Alignment Size = 100, Localized to 1000 out of 1011 contigs )
TTTTCTTTTATTTCACCCCATCTCGGGGACTCCGAGATTTCGTGGGGAGT
TCCCGGGAAAGTCCAAT
>rnd-1_family-201#LINE/RTE-BovB ( RepeatScout Family Size = 506, Final Multiple Alignment Size = 100, Localized to 1000 out of 1011 contigs )
GGATTGAGGAAACGAGGACGTCCAAGAGAAACCCTAAGACGAACGTTGAT
GAGAGAGGCCAAAGNTGCTGGACTGGATTCCATCC
>rnd-1_family-73#LINE/I ( RepeatScout Family Size = 1569, Final Multiple Alignment Size = 100, Localized to 1000 out of 1011 contigs )
GCAGATGATATCCTTGTGTACCGTCGAGGTAAAAACAGGCAGGAAATTAC
AACCACGCTACAACACGAACTAGACAGACTTAGTGAGTGGTGCCAGGAAT
CAAGAGCNCANGTGAACCCGTCNAAAGCCTCCTTAACATGGTTCTCTCTG
AATACCCACATCGTCAGTACACCAACGCCAGTCGTAAGCATGTGTGGTGT
GGACATCGAGAGAACGGACACCATGAAATACCTGGGCATGACATTTGACA
GATGCTTGTCATACAAATGCCACGTAGACAACGTCATACTTAGAGCCAGG
AAAGGTCTGACAGCACTCAAGGTGCTAGCAGCAGCTGATATTGAACAACG
CCTACTTTTCCTTCTCTATCAAGGGCTTGTGCTNAGCGTCATTGACTACG
GTCTTGGCCTCCTCACTGTCAGCAAAACCCAGCTAGAAAGACTGGACCGA
GTACAAAATGAGGCCATGAGACTCATACTCGGCTGCACAAAAGACACCTC
CTGCAACGCCATGCGTTATGTCCTGGGTTTGCCGACGATGGCTAGCAGAT
ACAAAGTGGCACAGGTCAAGGCGTACATGAGGGTATCGGCAGACGTTAAC
CACCCACTGCACAAAGCTATACACGACACAAAAGGAACGCGTCTCAAAAG
AGGCCGCTCTTGGATGGCAAAGGCTGAGGATTTAATCCAGCAGGTATGTG
ACCTAGACGNGATCAGTCACGGAAAAGAATGGACGAATACACCAGTAGAC
ATGCATGGCATCTCTAAGGTTGTCATCACACTNGGAAGGTACTGCAGGGA
TCAGATTCCTGCGGCCGTAGACACAGAGGTAAGGGAACTGATAGATCAGC
ATTCAGACCCAGAAGATATCATCATCTACACAGATGGATCCGTGAAGCGC
GGATCAAGGTCAGCATGGGCATACACAGCGCAAAGAANGGGGAAAACAAT
ACANGAGGACAGCGGCGCTTACCAGACAACCACGTCAAGCATGACCATGG
AGATAGCCGCTGCTTCTAGAGCNCTAGCATGGGTATCCGAGCAAACCGCC
ACACAGGCAGTAATTGTNTCAGACTCNATGAACATGCTTCAGAAGATAGC
AACAGGCGGTATGCGCTCTGAATGGGTAGAAAGCATTCGGAAATCGCACT
TAACCTCCGTNACCTGGATCTACACACCGGGTCATGCGGGCGTAAAGGGN
AATGAGCGAGCGGACCAACTGGCAAGCACTGCACTAATGATTGCGGGAAA
AAGCATGGACAGAGCAGATATCGTCAACGCTGTACGGACTGGGCTAGTGG
ATAATGAGGAATCCCTGACACTAACACGATTGCGTGACATGGGAGTTAAG
CATGGTGAAGCACGTCTNTGCCGTCTTCGAGGCCGAGANAGGAGACAATA
TAACCAGCTTCTCATGGGGACAATTAGTAGAAGTACTTTGGAGTGGCTGC
TGCNTCGGAGGACTGAGCACGCATGGGNATGCCCAATGTGCAGTGACGTC
GATTGTGATAACANAACATAAAATAACATCTTGTAGGGAGTCGGCAGTCC
GAAACCCAAGTTCAAGGTGTCTCCTTCGTGCCAAAGAACTGCATGGCTGT
TGGGTGAACAGTCGTTAACGAAGGCAGGCAGGTCGTTGTAGGGGCGACGC
CTGCTGGTGGATGTAATGTCCTAAGTCCCTTCCCCAGCTAATAGTGAGGG
TACTGCTGGGGTGACCGTTTATTAACCCTCATATAATGCTTCAGGTCAAA
ATGGACGCTAGGCACGGCCACCTTTTTTTTTTTT
>rnd-1_family-197#Unknown ( RepeatScout Family Size = 512, Final Multiple Alignment Size = 100, Localized to 1000 out of 1011 contigs )
TTAACTCTTTGAGTCCCAAGGAACGCATCATACGTTCATAGGTTCCTACC
TAGAAGCCCAATGAACGCATGATGCGCCGATTTTACGNCTCTCTTNACTA
CCCCTTGGGCCTGTGATGCTAAACCCCCTGGGACTCAAAGAGTTAA
>rnd-1_family-158#Unknown ( RepeatScout Family Size = 702, Final Multiple Alignment Size = 100, Localized to 1000 out of 1011 contigs )
AAGGCAGCAGTGACTGCCTCCACCTCCATTCTCAAACTAGACGTTGTGAT
ATCATATGCCAGGCTTTGTTGCACTAAGCGACGTCCATTCGCCTTTGCTA
TGAACCCCCATGCACTTCGTCTGCCCCTCAACACAGAGCCATCTGTATAG
ATAATCACATCACCTGGGCGGGAATTGTCATGAATCATTTGTTGAACTTC
TGATTCTGCAGCACCAGCTGGCCAGTCCCTGCACTCA
>rnd-1_family-99#DNA/hAT-hATm ( RepeatScout Family Size = 1193, Final Multiple Alignment Size = 100, Localized to 1000 out of 1011 contigs )
TAGGGCTGTACCGAATAGTGATTTTCACTATTCGGCCGAATACGAATAGC
GGGACCAACTATTCGGCCGAATACGAATACGAATAGTGNATCATCATCAT
CAGGTGCCTTGCCGACTGGCGTGGGCGATTATGCCTCGCCACAATCTGCG
ATCTCCTGCAGCATGTATTAGTTCGTGTGCTGACACACCTCCATGAAAAA
CCTTCGTTCCATGTTGTCAGCATTAGGCCAGCTTTTTGTCTCACTGAAGG
TATTTCCAGCTGTACTAAACAGGAAAATACGACAAATACAGAGAGTCAAA
ATGAAAACCCGCAAGGCGAAACATCAAAAACAAAAATAACGCCGACGAAG
AAAACAATGCCGTCCTTACAAGTCGCCCAGCCCCCCGCGAGCTCACGAAA
CCAGACGCCGGGCGGCCAACGCCAGAAGATCAAACAACAAAGACAATCAA
GAAACCGAACGTCGATCAAAACATTCAGCCGCTGCCGTTTCCACGAGACG
ACGAAAGAACAGATACGACACCCATAAATGATGACGAACTCCCGTTACTT
CAAAGAATCAACGAAGAGGACACTCCACTCAAAGAAATCAAGCCGACAAC
ACTAGAACACTTGCTTTTCTGCCCCTCTTACATTTTTAAGTGTTGCATTT
TGTTTCTACA
>rnd-1_family-447#LINE/I ( RepeatScout Family Size = 108, Final Multiple Alignment Size = 100, Localized to 1000 out of 1011 contigs )
ACTTTGCCCATGTGGACAGGCACCACAGAATACTGAACATGTGCTACAGA
CATGCTCTCTACATGCAGTAGAGAGATCCCAGGTTTGGCCGGTTGGCATT
CCAATGGAAAC
>rnd-1_family-286#LINE/RTE-BovB ( RepeatScout Family Size = 291, Final Multiple Alignment Size = 100, Localized to 1000 out of 1011 contigs )
AAAACTAAGATTCGATTGCTCAGAGCACTAGCTATTAGTACATTTACATA
TGGCTGTGAAACGTGGACCTTAACAGCTGAACTCGAAAGGAAGATACAAG
CATTGGAAATGCGATGTTTCAGAAAAATTCTTGGCATATCATACAGAGAC
CACATTACAAACGAAGAGGTTCGCCGTANAATTATACAGCACATTGGCAA
CTATGAACCTCTTTTAACTACAGTGAAAAGGCGAAAAATGCAATGGTACG
GACATGTAATAAGATCTAACGGCCTCTCAAAAACAATACTGCAGGGCTCA
GTAGAGGAGAAGAGGCAGACCAAGAAAGACCTGGTTACAGAACCTGACTG
ACTGGACAGGCCTCAGGCATGCAACCATGAAGTCCATCGCANCTGACCGC
CAAAGGTGGAGAGAGCTGATCAGACAGTCAACAGAAACTGGTGACCCAAC
GACACGCAGTGTTACGGGATGATGATGATG
>rnd-1_family-129#Unknown ( RepeatScout Family Size = 923, Final Multiple Alignment Size = 100, Localized to 1000 out of 1011 contigs )
TCCGATCTTACTACCCAGAGACCAGGGGAAATTACTAGAAGTCCACGTGA
AAAAATCCCAGCCTTCACCGGGGCTTGAA
>rnd-1_family-1#RC/Helitron ( RepeatScout Family Size = 10727, Final Multiple Alignment Size = 100, Localized to 1000 out of 1011 contigs )
TATATATATATATATATATATATATATATATATATATATATATATATATA
TATATATATATATATATATATATATATATANAAATCAATGTTTGTGTGTT
TGTTTGNCCCCTATAGACTCGGAAACTACTGAACCGATTTAGCTGAAATT
TTCAGGATATGTTTGTTTTGATACCGGATTTTGAACCGTCGTGGTTTGAA
ATTCAACCTGTCACTGTTAGAGATAGGTGACCACAATTTATGCCAAAATA
TTCGAAACTAATATTTATAACTTTAGTGATTTCTAATTATAGCCACGTTA
GTAATTGCGCATGCGCCGTATTCACCATTCGCCGGCGAGTTACGTGCAGC
CAACGCCTTCTCTAATACTAATACATAGAGTAGGTCGTGGTACAGCAAAC
AAGACTATCTCTATATTGTTGCCACAATAACCATATTAAACACGATTTCT
ATTTTCTGTTTTTTTTTTTCAAACAACCTTCGATGGGGGGGGGGGGGGGG
GGGGG
>rnd-1_family-28#SINE/tRNA ( RepeatScout Family Size = 3226, Final Multiple Alignment Size = 100, Localized to 1000 out of 1011 contigs )
CCAGCCTNAAATGGGTACCAGGTAANGTCCTGGGAAGTAAAGGCGGCCGG
CGTGATGCTGACCACA
>rnd-1_family-252#Unknown ( RepeatScout Family Size = 368, Final Multiple Alignment Size = 100, Localized to 1000 out of 1011 contigs )
CATCGGCGACCGGGTCGCCCATTGGCTCGCCGGTAGACGACTTCGTCGCC
GGTCGGGACAGTATTTGGGTCTGTCTCCTTTGATCGCATCAACACTGCAG
GAGTCCTTTTCAGGGCTCTTGGTGGCGTGCAATGCTAAGCCATTTTATAT
GGCGCACATAACCTAGTCACAATTATAACCTAAAGCTCCCCCTTCGGGGA
TGCTGGTTGAACGTGACGATTTTTTT
>rnd-1_family-457#Unknown ( RepeatScout Family Size = 102, Final Multiple Alignment Size = 100, Localized to 1000 out of 1011 contigs )
TATTTATAGGCCGNACAGGTCAACGGGAATTCCCGTTCTTGTGCAAGAAT
TGAGTCCCTCTGCGTTCACAGTTTTTATCGAGTAGATTTATACACAAATT
AAACTACAGTTTCATTAATTTGCGACATATTTTATNGAACTATACGTCAT
TTTNAAGGTAAATAAGTGTGCCAATTAAATATAACAATAAAGGCTCTTAC
AGACAAACAAAAATGCTTTTGCTACAGTCAACATGAACATAAACATCAAT
AACGTTTAGATATAAACTAAAAGTTGTTCCAGCAAAAGTAAAGAAATATC
AGTGCTAACTCTTTGATTCTGAGAGGGTATTGTTGCATCAGAGGAGCCGC
GGGGGGGGGAGGGGGGGGGGGGG
>rnd-1_family-290#Unknown ( RepeatScout Family Size = 286, Final Multiple Alignment Size = 100, Localized to 1000 out of 1011 contigs )
AGAAGAAACTCCACAGGGGAGCATGTACAGCAGGGGTCTACCAATCATCA
GTAGAAGTAATCTCTCGTCGACAAATGTTTCGGCCC
>rnd-1_family-24#LINE/RTE-BovB ( RepeatScout Family Size = 3591, Final Multiple Alignment Size = 100, Localized to 1000 out of 1011 contigs )
AAGAATAGACCCACTGCCTCCCCAAAAGCATGTCGTAAGAGTCGACTAAT
TGGGGAGCTTCCTTCGAAGTCGGAGTGCATCTGCCTGAGAGGCAAGGAAC

>rnd-1_family-349#RC/Helitron ( RepeatScout Family Size = 193, Final Multiple Alignment Size = 100, Localized to 1000 out of 1011 contigs )
TTTAAACGACCACTAATATAAAGACACAATTATATGNTGCGTGTTCTAAA
GTCGGCAAACCAGACTATCTCTATATCTGCGCAGANAATGATTGCGACAT
TAACCATATTAGACACGTGCGATTTCTATTNTCTTT
>rnd-1_family-203#Unknown ( RepeatScout Family Size = 503, Final Multiple Alignment Size = 100, Localized to 1000 out of 1011 contigs )
GCTATCCTCCGAATAACGGTCCCAAATTATCGAGGCCGAAAATATACCCT
AACAGGGCCTCAGTCACATGTAAATTGCGGACTTCCGGCGACTATACCGC
CACCGCCGAGA
>rnd-1_family-194#Unknown ( RepeatScout Family Size = 520, Final Multiple Alignment Size = 100, Localized to 1000 out of 1011 contigs )
AATTTAAATAATGCGGACACAAACAATACATTGCACAATTTATTGCCAGG
CATATTTCGCTGTATCTCGTCAGGTGCGTTACTACAGAGTTACATCAACA
TAAAATGAAGCACAAAACTGAATAAATTCAACTGAAATGCGAATAGTTTC
TTCCGATACATCGTGTGTGTTCCATGGCCGCCGGAAGCTCACCGTAGTCA
CGTGACTTACCAGGGTAACTTCAAATTTACNACGAATTCCTTCTGCTTAC
AAAGGAGGGGGGTTGTTGATTTTTATTGTTAAAGCTTCGGCCANTCTCAG
CAGTCGCCTGTTCGGTGTGTGGTAAACNACACGGAAAGCACTGTCCTTGT
CAATTACGTGTCCGGAATTAAGCAGATG
>rnd-1_family-110#LINE/RTE-BovB ( RepeatScout Family Size = 1078, Final Multiple Alignment Size = 100, Localized to 1000 out of 1011 contigs )
ATTTAAGTATCTGGGCACATGGATAACATCAGATGGAAGATGCATAACTG
AGATAAGAAACAGAATAGGACAGGCAAAAACTGCATTTTATAAAATGAAA
AACATCTTGTGCAATATATCCTTGTCATTGAGAGTTAGAAAAAGAATTCT
TGCTTGCTACATACATCCAGTTTTAACATATGGCTGTGAATCCTGGACAA
TCGGTAGGCAGGCCAAACAATTTCTNGAGGCCTCAGAGATGTGGTTTTAC
AGAAGAATGCTTAGAATACCTTGGACAGCCAAAAAGAGCAACCAAGAGGT
TTTGAAAGAGGCGGGAGCCCGAAGACA
>rnd-1_family-16#Unknown ( RepeatScout Family Size = 4187, Final Multiple Alignment Size = 100, Localized to 1000 out of 1011 contigs )
GTGGCGCGGTGATTTATGTCACAGGCGTGAGGGGAAGTTAAGTCCAACGT
GATGTGTATAAGGAGATACTCCGTACGTCACTCGGGCGCCAGTCCTTCAC
TGTCCTGGTTGTACGGAACCTCACGCAAGACCCCTGCAGCACGTCCTCGT
CGTGCGCCACGGATAATGTCTCAAATGAGCATTAACAGAGCTGTCAGGGG
ATCTCGGAGTTCGGCGGCCCCCAGAGGTGATGTGTCCTTGTGGCTCTCAT
CAGCCCGCCCCCAAACGCTTGGGTGAAAAATGTTATCAAAACTCATTAGG
AACATGAGTAGGCTTGCCAAACGTACAGCCAAAATTACAACCCTTGGTTA
AAAGACTGCGGAGTAAAGAGAACATTGTTCGCTGCACATCCTCTGTTAAC
CCTCAGTGTCGTCGTCACCGCGCTGAGGTACACCACAACAGCAACCATCC
ATAGGCTGGCCATCCTTGTACATCCTCGGTTAACCCTCAGTGTCGTCGTC
ACCGCGCTGAGGTACACCACAACAGCAACCATCCATAGGCTGGCCACCCA
CGTACATCCTCGGTTAACCCTCAGTGTCGTCGTCACCGCGCTGAGGTACA
CCACGACAGCAACCATCCATCGGNTGGCTAAGCCTAAATGTCCGACAAAA
CTAGATCATACGGATCAAAATCCGACCATCAAAATTCGTATTGAACTGAA
AAAGNCCGAATGTCCACACCCAAAGACCCCACTCGCCCGAGTGTTGGGAC
AAAACTGATAACGATATGCCTGACGCAGGATGTAAAATTCTGTCGGGCTA
ACGGCTCGTCAAAGAAATCTAACGTGCGAAGAAAAAAGAATGTACCTATC
TGTGTGGTCACAAAAGTCCAAAACCCGCGGGCTGCTCCCCGCTGACTTCC
GGAGGGCGCAGCCCCTGTCGAGCGGGAGGCCTGATACGGTTGTGAGGTTA
AGCAGGCATGTGCAGGACGTGACGATTCCTTGGGTGAGCCCAGAACCAGA
GCGCCATGTGCCGGCTCTGCATGCATGGAAGCCTCCTTGGATGGCGGGGA
ATGCCCATGATCTGCCCCTGCCTTCCCTTGAGGGCTAACCGTTCCACAGG
GGGCTGCCCCAAAGGGGTACTCCGGGGGCAATACCTGCGGCGAAGGAGAC
AAAGTGGACACCACACAAATCAGGCAACGTCTCGACCCACACAAAACAAT
GGCCACAGTCANCCTAGAAATAGGCCTGACGTCTTCCTTCGAAGTCGGAG
TACAGCTGCCCGNGAGGCAGGGAAATGAAAAACGGTTGTACACGCAAAAA
TCAGGTCCAGGTGAAAGCCAAAAGTCCAAGCGGACGATTAACCGGGACCT
TCCGCCGGAATTCACAGCCGGTGATCGATAAAAAAAAAAAAAAAAAAAA
>rnd-1_family-104#LINE/I ( RepeatScout Family Size = 1153, Final Multiple Alignment Size = 100, Localized to 1000 out of 1011 contigs )
TGTGGCATGAGTGGATACCANGCATCAGTACGCCAACATTGCAGGGAATC
ACGTGGATATACTGTCCGGGATATGCAGGAGTGCGAGGGAATGAAAGAGC
GGATTTTCTGGCTACAAAAGCGANAGCTACGGGAACACTCGTACTGGACA
AGGGAGACATTCTGAAGACCATNTATGAACGAATGCTGACAGAAGACACG
AGATTAGATGAAATAACATGTGTAAGAATGTGTGAACGAGGAATTAGGTG
TGGATCCGGCAAGGAGGACGTATGAGAGGAAGAGAACGACGTGTGTATAA
TCAGTGTGCTACGGGAACAGTTAGCATCTACACCTTAAGACATTTGCTGC
GGGAGACGGAGCATCTATGGGTATGCCCGGTGTGCTATGATGTCGATTCT
TAAATCAGTAA
>rnd-1_family-205#LINE/RTE-BovB ( RepeatScout Family Size = 498, Final Multiple Alignment Size = 100, Localized to 1000 out of 1011 contigs )
AGCATAACTAGAATGTCTTTGCATTGGAACCCACAGGGGCATAGGAATAA
AGGAAGGCCAAAA
>rnd-1_family-339#DNA/hAT-Charlie ( RepeatScout Family Size = 204, Final Multiple Alignment Size = 100, Localized to 1000 out of 1011 contigs )
CCACGACCGGCTCCAGCTGACGGGCCGTGCTGCTGACGTCACCGGGTCGG
GCTAACGATGCGTTAACGCAGCGGTTCTCAAACTGGGTGCCGAGGCACCC
CGGGGTGCCGTGAGCGTATGCCAGGGGTGCCGCGGCAATAATCAAGAAAA
GTCGGCTAAAAATTGTGAAATTATTAAAGAAGGCATGTAGATACTTAAAA
GTTAAAATTTAAGTTGTCTTCCCTCGCCACTGTCGAAAATAGTTTATTTC
TTGTTTGAGAACCGCTGCGTTAACGCATCGTTAGCCCGACCCGGTGACGT
CAGCAGCACGGCCCGTCAGCTGGAGCCGGTCGTG
>rnd-1_family-265#Unknown ( RepeatScout Family Size = 339, Final Multiple Alignment Size = 100, Localized to 1000 out of 1011 contigs )
AACTCTTTGAGTCCCAGGGGGTTTAGCATCAGAGGCCCAAGGGGTAGTAA
TGCAATTTTTTAATTTCACAAGTGTAACACATTAAAACAGACCATACTAA
TTCAGCTGCCGCGCAACATACACATATTATACATCAAAGTGACCAGGGAT
TGTTGAGGAATAATATTAGAATACNGCTACAACAAATAATTGCGTTAGTA
GTTAAATATTAGTAAATAAAC
>rnd-1_family-93#DNA/hAT-Ac ( RepeatScout Family Size = 1257, Final Multiple Alignment Size = 100, Localized to 1000 out of 1011 contigs )
TTTATATTAGGGCTGTACCGAATATTCGCTTCGTATTCGCTTCGGGGCCG
AATAGTGGACCTAATAACTATTCGGTATTCGGCCGAATAGTTGCGGTCGG
GCCGAATACGAATAGTGGTTACCTTACACCCGTTTCTGGACTGGTGGAAA
ATAAACATATCAAGATTTCCCACCTTGGTTCATACTGTCAAGCGTTATCT
TTGTGCACCACCTACGAGCGTACCAAGTGAACGTCTGTTTAGTACAGCTG
GAAATACCTTCAGTGAGACAAGAAGCTGCCTTAATGCTGACAACATGGAA
CGATTTTTTTTTTTGAAAGCTAATGCCGCTTTCATGGATTAACTAAGCTG
TCAGTGACAATTTACAAGTTTAGTTACTTGTTATAAAACTAAGAATACTT
TCATTCCTAGGTATTAGTTACCACAGACTGACTGACTGAAGGATGCAAAA
CATGAAATGTTTTTAAATGTTTACTATTCTGTACTACATTTTGTGAAGTA
AAATTTCAGCGTACATTTGACATTATGGATGTTTTTTTTTTAGATCTATT
TTATACACGAAAGTGGAAGAATGGGCCTCAGTTTGAATAGTGGGAAGACA
GAAGTAATGGTGGTATCAAAGAAACGAATTATTCCTAAATGTGTAATAAA
AGTCGATGGTGTTATTTTGGGACAAGTACAGAAATTTAAGTATCTGGGCA
CATGGATAACATCAGATGGAAGATGCATNACTGAAATAAGAAACAGAATA
GGACAGGCAAAAACTGCATTTTATAAAATGAAGAACATCTTGTGCAATAT
ATCCTTGTCATTGAGGGTTAGAAAAAGAATTCTTGCTTGCTACATACATC
CAGTTTTAACATATGGCTGTGAGTCCTGGACAATCGGTAGGCAGGCCAA
>rnd-1_family-306#LINE/I-Jockey ( RepeatScout Family Size = 255, Final Multiple Alignment Size = 100, Localized to 1000 out of 1011 contigs )
CTCAGTTGAAGAAACAAGAGAGAGCTCCAACAGCCAGCGACTCCCTTTTT
GAAAATGAATTTAGCATGGATGAATTAGAGCAAGCCCTGAAGAAATTAAA
ACCTAGAAAATCCCCAGGCCCAGATAAGATCCACAACGAAATGCTGCTAC
ATCTTGGCCGGTCTGGGAGAGAAGTAGTTCTCAGGCTTATTAATAAAACT
TGGAGGTCAAGCAAACTTCCAAAGGCATGGAGGAATGCATATATCGTCCC
CATTCTTAAAACCAAAAAGCCTCCAGATGACCCCAAAAGCTACCGCCCGA
TATCCTTAACATCATGCTTGGGCAAAGTTGCAGAAAGAATGATAAACAGG
CGCTTATATTGGTTCCTNGAGAGTTCTGGTGTTCTATGCCATGAACAGGC
AGGCTTCAGAACCAACAGCTGCACAGAAGACCAGCTGTTCAGACTGACAC
AAAGAATACATGATGGCTTCCAGAATAAGAAACACACAGTGGCNGTCTTT
GTCGACCTCCAGCAGGCCTATGACAGAGTATGGAGAAAAGGTCTCCTGAT
GAAGATGATGAGCATAGGAATACATGGCAGATTGTATAACTGGGTGAAAT
ACTTCCTGATAGATAGAACAATCCAGACTAAGATGCACAACGCAATCTCT
TCTAAAGAAGTCTTGGAGGAGGGCTTGCCACAAGGCTCATCATTGAGCTG
TACACTGTTCCTAATCTTTATCAATGACCTGCCAGAACAAATCAAGGCCG
AAAAAGCCTTGTACGCTGATGACCTAGCAATATGGCAGAGTCATGAAAAT
GTGGAAAGTGGAGCCCAAAGACTGAATGGAGACCTTAGAAGACTGCATGA
GTACTGCCAAAGATGGAAACTCAAGGTTAACTGTGCAAAGACGGTCTACA
CAATCTTTACCAAAAGCCACCAAGTAGCAAGGAAGAATATTAACCTGAGG
TTAGACAAACACCAAGTGATGAAAGAAGAGCATCCCACATACCTTGGAGT
CACACTTGACCGGCAGCTCAGCCTCAAGAACCATATTGAAAACGTCAGGA
ATAAGGCATTGAGGCGGTTACAGTTATTAAAGAGACTTGCAGGTACATCA
TGGGGATCAGACAAGGAAACTCTGAGGGGCTTATATCTAGGATATGTTCG
CTCTGTGATAGAGTACAACAACTCACTGCTTACAACTTGCTCCAAAACTA
ACCTAGAGACTCTTGACAGAGTACAAAATAATGCCCTCCGATTAATCTGC
GGAGCTATGCAGTCTACACCAACTGCTGCATGTGAAATCCATACAAATGT
GGAACCCCTCGGGTTGCGGAGAGAAAAAGCCACTTTAGAAATTTATGAAA
GATGCGTTAGGAAAAATCGTAACCATCCTAATAGACATCTTGTAGAAAAC
TGGGAATACAAACAAAGAATAAAGCACAAATCGGTTTTACACTGTGTTAA
TGAAATTCAGGACAGATACCACCTCCCAGAAAGACGTCAAGGAATTCAGA
ATGTTGCAAGAAACCTACCACCACATGCTCGCTTTAAAGCTCCAGAAGTC
CGAATTAAATTGGTAGGCGAGGAAACCAAACAGTCCGACCCAATCGCTCT
TATGAACTCATCACTAAAGACCGTTGATTCTTACCCCCAAGAATGGATAC
ATGTCTATACTGATGGATCAGCATTTAAAGCTACCATTAAAGCAGGTTAC
GGAATCTACATAGGTTATCCCGATGGATCTGTTGAAGAGATTTTTGATGC
ATGCGGGGAATTCTGTTCAAACTATGAAGCTGAAATAATTGCACTGGAAA
CAGCAGTATACCACCTAAAGACTGTAATGGATGTTTACCCTTCAAAGGTC
CAAAATATTGTCATCTTCACAGATTCAATGTCTGCCCTTCAAGCTCTGGA
GGGCAGTGAACGCTGCAGAACTGACATAGCCAAGATAATCCTGGATGCTG
ATCAGCTTATTACCTCATACAACATCAGAATAGTGATGCAGTGGATTCCA
GGTCACTCCGGCACACCAGGTAATGACAGAGCTGACAGATTGGCAAAGAA
AGGAGCAACACAAGAACAACCACCTACAGCGACAACCCTCCAGACAGCAA
AAACACTTATAAGAGCTATAAACAAAGAGACTTGGTTGAACAGATGGGCC
ATGGGAGACACTGGAAGAGAGGTTTATAGACATATGGCTGGCCCTGATCC
TAATGACAGCATTAACCATCTAACAAGAAGGGACCAGGCCACCATCTTCA
GACTTAGAACGCAACATACTCCACTCAATGGACACCTAAACAGAATACAG
CCACAACACTCCCCAGAGTGCCAGCTATGTAACTACCCCTACGAAACTGT
TGAACACCATCTCTTTGAGTGCCCAAAACTCAGCGAGACNAGAAGAACGC
TACTCCCTCCGAGACCAGACAAGTGGAACACCTTGTACGGAGGAAAAGAA
CAGCTTGTGAAAACATGCAAATTCCACTACATGGCATTGGGCCAAAGGGC
GAAAGCTCATGCGCCGCTGGATCGATAACAACAACAACAACAAC
>rnd-1_family-101#Unknown ( RepeatScout Family Size = 1157, Final Multiple Alignment Size = 100, Localized to 1000 out of 1011 contigs )
AAACCCCGTTCAACCGTTAGGTTATATTAGGGCCCCGGCAACAGCCGGGG
TGGGGCTTCAAAATAACGAAAAA
>rnd-1_family-141#LINE/RTE-BovB ( RepeatScout Family Size = 864, Final Multiple Alignment Size = 100, Localized to 1000 out of 1011 contigs )
TTTCATGTAATAAGTGATAAAAACGGNAACACNTTAACGGAANCCAGACA
NATTCTAGGAAGATGGNAGGAATACTGCAGNGGAATGTATGANGATGAAT
GACAGGNAGGATATNAANGACATACTTGTGAACCAGTNACAGNAGAGGCA
GAACCNGAGCCTTCACTGGATGAGGTNCGATCGGCAATANGCAGCCTGAA
GAAAGGNAAGTCACCNGGNTGCGACGAGATACCAGCNGAACTGATTNAAG
CGGGAGGAGAGGCCAGCGTCCGAATCTACCATGCACTGTGCGCGAAGATN
TGGAACAGTGGCATTTGGCCNAAAGCGTGGAAAAGAACAATCTNTATCCC
NCTCCCAAAGAAAGGAAATCTGAAACTATGCNCCAACTACCGTACCATCG
CNCTAATNAGTCATGCNAGCAAAATCCTCTCTACGAATTATCATGAAGAG
GATTGAAAGGAAANTACAATATGAGCTAGATGAAGCACAAGCNGGTTTCA
GACAGGGTAGAGGAACTAGGGATCACATNTTCAATATGAGAATAATTTTN
GAAAAATGTAGAGAATACAACGTAGATCTTCGTGCTTGTTTTATTGATTA
TAGCAAGGCATTTGATTGTGTCCAACATCAGAAACTGTGGACTATTATGA
GAAGTATGGGGTTTCCAGCGCATTTAGTGCATTTAATTGAAAATCTCTAT
CATGAACAACAAGCAGCCGTCAGAGCAGCTGGTGAAACATCNGATTGGTT
CGAGGTGCAAAAGGGGGTGAGGCAGGGGTGCGTTCTCTCACCATACCTAT
TCAATATATACGCAGAAAATATAATGAGAAATGTCAAAAATGACCAGACT
TGTGACAGTTATGATCCGCTCAAAATTGGTGGCAACCCTATTCCGGAACT
CCGCTACGCAGATGACACAGTCCTCCTTTCGAACAGCGTAAAGGGAATAG
AAAATTTAATATTGTCTGTCCAAAAGCACAGTGAAGATCAAAATCTGTTC
TTGAATTTAAAGAAAACGAAAATAATGTCCACAGATAAAACTGGCTGTCA
CCCAAAAATAACAATAAATGATGAAGAAATTGAAAATGTCACAAACTTTG
AATATCTAGGCTCTATAATAAACAACAATGGAGACTGTTCGACAGAAATT
AAAAGGAGGATGGCCATAGCAATGCAAAGATTGAACAGCCTTAAAAGTCT
ATGGTTAAGCACCAGCAAGGAGATAAAAATTAGAATTTTGAGAGCATGCA
TCTTCCCTGTGGCNACATACGGATGTGAGTCGTGGACTATCTCTCAGTCC
TTAAGAAAGAGAATAGGGGCTTTTGAGCTGAAATGCTA
>rnd-1_family-285#Unknown ( RepeatScout Family Size = 293, Final Multiple Alignment Size = 100, Localized to 1000 out of 1011 contigs )
GAACACAGAGCAAGGGGAAGACCACGCAAGAGATGGAGCGACGNCATCAG
GAGCAACCTAACAGAAATGAACACCAGCTTGTACAATGCATTGGAAAAAG
CGCACAAACGATCCTTACATCTCCCCCC
>rnd-1_family-334#Unknown ( RepeatScout Family Size = 210, Final Multiple Alignment Size = 100, Localized to 1000 out of 1011 contigs )
AGCTGCAATTCTGGTGTGGGACCGTTAGTGTTGGCACATCTGACAGCTGC
CTTATGCATTTTTACTTTGCGTGTGCAAGCTT
>rnd-1_family-31#Unknown ( RepeatScout Family Size = 3007, Final Multiple Alignment Size = 100, Localized to 1000 out of 1011 contigs )
TTTTACAGATCTGACTCATTTGTATGCAGACTGCTGGTTCCTTGCCTCTC
AGGCAGA
>rnd-1_family-9#SINE/tRNA ( RepeatScout Family Size = 5155, Final Multiple Alignment Size = 100, Localized to 1000 out of 1011 contigs )
TTTTCAAAAATGACCTTGGCTCCCAGGTCGACCCAGCCTTGAGTGGGTAC
CGGGTGCAGTCCCGGGAAGTAAAGGCGGCCGGCGTGATGCTGACCACATC
ACCCATCTTGTGCCGATTGGTCTATAAAAATATAGGTCTAGCCCTATATG
CCCTATACGCCTAAAGGCGTGGAAAAGGGTCCTTTA
>rnd-1_family-95#LINE/RTE-BovB ( RepeatScout Family Size = 1236, Final Multiple Alignment Size = 100, Localized to 1000 out of 1011 contigs )
TGCAAAGATTGAACAGCCTTAAAAGTCTATGGTTAAGCACCAGCAAGGAG
ATAAAAATTAGAATTTTGAGAGCATGCATCTTCCCTGTGGCTACATACGG
ATGTGAGTCGTGGACTATCTCTCAGTCCTTAAGAAAGAGAATAGGGGCTT
TTGAGCTGAAATGCTATAGAAAGATTCTCAGAATATCTTGGACAAAGAAG
ANGAGAAATATTGACATCTTAAAAGATCTGAACATCAAGGAAGATTGGCT
AATAAACAGCATCCTNTCTCGGAAGCTGAAATATTTTGGTCATATCAAGC
GCCACGACGGATT
>rnd-1_family-311#LINE/I ( RepeatScout Family Size = 249, Final Multiple Alignment Size = 100, Localized to 1000 out of 1011 contigs )
AACACAAAATAACATCTTGTAGGGAGTCGGCAGTCCGAAACCCAAGTTCA
AGGTGTCTCCTTCGTGCCAAAGAACTGCATGGCTGTTGGGTGAACAGTCG
TTAACGAAGGCAGTCAGGTCGTTGTAGGGGCGACGCCTGCTGGTGGATGT
AATGTCCTAAGTCCCTTCCCCAGCTAATAGTGAGGGTACTGCTGGGGTGA
CCGTTTATTAACCCTCACATAATGCTTCAGGTCAAAATGGACGCTAGGCA
CGGCCACTTTTTTTTTTTTTGAGCCGTGGCAATTTTTCTTCTGCCAGACG
GTGGCCGTTGCATTTTTGCTCCATTTGTAGACTGGAAGGATATAGT
>rnd-1_family-15#LINE/I ( RepeatScout Family Size = 4196, Final Multiple Alignment Size = 100, Localized to 1000 out of 1011 contigs )
GATACTGACTTTTGCGGATGATATACTTGCATATAGGCAGGGGGAAGAGA
GGGAACAAACAGCCCGGGAGCTACAAGCGACAGTAGACAAAGTGACTGAG
TGGTGTACAGAAATGAGGGCTGTCGTCCACCCGGAAAAGGCGTCTGTTTT
GTGGTGTTCTCTGGACAACAGAATCGTTAAAGCTAATGTCCCAAGTCTCA
CGATAGATGGTAGAGACGTCAACAGAGAGAGCAAACTGAAGTATCTGGGA
ATTACATTTGACAGGAGCCTGTCATTTAAGGACCATGTGGAGAGTGTTGT
GACGAGATGCCAAAAAGGACTTAGTGCACTTAAGACTATGGCTGCAATTG
ACATAGAGCAGAGAATGCTTTTCACACTATATCAGCACCTGATCCTGTCA
GTGGTNGATTATGGCCTGGGACTGCTTACCGTCTCAAAGAGTCAGATGGA
CAAACTAGAGCGCATACAGAACGCGGCTATGCGGGTCATTCTGGGTTGCA
CCAGAGACACCCCGGTGGTGTGTATGCGATACATCCTTGGTTTGCCGACG
GTTGCAGGTAGGCACAAGGTGCTGCAGGCGAAGTCATATCTCAGGGTAGC
TGCAGACACAGACCACCCTCTGCATGAAGCTCTGGGTGCAGTTAAGGGTC
AGCGGCTGATAAGAGGGAGGTCATGGATGGCTCAGGCAGAAGACACAATC
AGACAGGTTTGCATCCTTGAGAACATTAGGCGAGGAGAGGAGTGGGTCAA
AGTGCCACCTGAACAGTCAGACTTGTGTAGGGTCATAATCACGCTGAGCC
GGGAATGCAGAGACTGGCCAGCAGGTGCCACAGAGGTGGAAATTCAGCAA
TTAATTCAAGATAATGCTCGCTCAGAGGATTTGATCATTTACACAGACGG
TTCAGTGTCGAGAGGCAAAAGAAGTGCTTGGGGCTTCTTAGCAAAAGTTA
ATGGTCGACGTTTGGTGCAGGAGAGCCTAGCATATGATACCACAACATCC
AGCTTAAGAATGGAGGTGGAGGCGGTCACTGCAGCTTTCCGCTGGCTAGA
GAACACGACACACACACACGTCGTGATTGTAACTGACTCAGAAAGCATGC
TGAGGAAGATCAGAACAGGCATGCTTCGTGCAGAGTGGCATGCTTCGCTG
CGGAGGACACGGGTGAGGAGTATTGTCTGGATTTTTTCACCGGGTCACGC
CGGTGTGTTGGGAAATGAACAGGCGGACAGACTGGCTGGCTCTGCACAAC
TTGGTGGAATACTGATACATGATAAGGCAGACGTGGTTAGTGCCTTGTGG
GAGAGCGTGTACAGTTCGGAGGAGCAGATGGATCACCACGGTCTGGTGAG
ATTGATGCAGCTGGGGGTGACGAGAGGTTCTGGCAGATGCTCGAGGCTCA
GAGGAAAGGCAAGACGGACGTTTAATCAGAANGCTACTGGCACCATTAGT
ATCGGAACTCTTCGCTGGCTGCTGAAGATGGGGACGGAGCGCTTATGGGA
ATGCCCCGAGTGCTGTGATGTCGGTTCTTGAATCAAATCAAATCA
>rnd-1_family-376#Unknown ( RepeatScout Family Size = 165, Final Multiple Alignment Size = 100, Localized to 1000 out of 1011 contigs )
AATATACAGTAATTGACACACGCGTGGAGATTGTTTGGAAATCAGTTCAC
ATGTGCAGCGATGCGTGGTGATTATTTTGATAGCCTATCCCGCATACAAT
GAAAAATCCGCAACTCACGGGAGGCTAATGCTGGAGATGACCACCTGAGA
GTGAAA
>rnd-1_family-411#Unknown ( RepeatScout Family Size = 131, Final Multiple Alignment Size = 100, Localized to 1000 out of 1011 contigs )
TATCACTATCATTAACCAGTCACTGTTTGTGTAAATCAACAAACTGGTAA
ATTCATTGTTAGTAAATAAAGCTGTATGTCAAGTTTTATACTGCATCAGT
TTGTTAAATTCCAAGTGTCTGTTCTTACATGTTTAATTAAACTGTTAGGA
TAGAATACATTTGGTGGGGGCTCAAATAATATAATAATTCTTTAATTATT
CATAATAACACCGGGAGAAGGTAGATGACGGAGGAATCACTTGCCCTGTC
TAATAATTCATTAAGTATGATAGACATCTAAAATCCCTTCTCCTTCTCCT
GTGGGTACCAAGTNCAGCTAACGTTAATGTACTTCGGAACGAGCCAATAT
GGCTGTTTTCTTGGNTATCCAGGACTTTGTCTGAGANCAACATAGCTCAG
ATANTAGTCCGGTTTNTCNGGTGGATGGGNATGTGTTGAGAGGAAAATCC
CTACTCAACAATATAAACATTTAAACCACGCGTCACGTCACA
>rnd-1_family-266#Unknown ( RepeatScout Family Size = 339, Final Multiple Alignment Size = 100, Localized to 1000 out of 1011 contigs )
GTTGAACGGGGTTTCCGGGATTTGTACCTGTTTGATTCTCATCCTTGAGA
TGTTAATCCTACAGACTGCAATCCTGGAGGGGAAAA
>rnd-1_family-220#LINE/I-Jockey ( RepeatScout Family Size = 456, Final Multiple Alignment Size = 100, Localized to 1000 out of 1011 contigs )
GGGTGGATATGGAAAAGGCCTTCGACAAAGTGTGGAAAAATGGGCTGAAA
CAAAAGCTACTTGAAAGTGGAATATCCCATCACATGCTTGGGTGGATCGT
AAAATATCTTGAAAATCGATCTGCAAGAGTCAAGATACAGGGTTCAAGGA
GCAGATCAGTCTCAATGANACATGGAGTTCCACAAGGCGGAGTTCTGTCC
CCAATTCTTTTCCTAGTTTACATTAACGACATAAAATCAACCCTCTGTAA
TGGAGTTCAAGCCGTTATGTATGCCGATGATCTGGCGCTACTGAGTTCAG
AGGAGGACACTGGAAAAGCACAGACAAGGCTTCAAGAATCCCTCGGAACT
CTAGAGAGGTGGTCCAATAGCTGGTACATGCCTGTAAATGGGGCCAAAAC
CACACACACCATTTTCAGTCTCTCTACCAAACCCCAGAAAGTTTCACTTA
NATATGGCAGCCAGGCACTGAAACATGATGACTCACCGTCATATTTAGGA
GTAACCTTTGACCCAAGACTCACATGGAGAAAACAGATAGAAAAGACACA
GAGCAAGGGACTCAAGAGAACNCAACTGATGAGGAAGTTAGCTGGAACAG
ACTGGGGGGCAAACCTCAGTGTCCTCAAGAGGACCTATACAGGCTATGTG
AGGCCAACACTAGAATATGGAATAGCTGCTTGGGGCACAGCAGCTAAATC
AAATTTTCAGAAAGTCTCAAAGATCCAAAACCATGCTCTCCGTATTATGA
CAGGGGCCATGCGCTCCACGCCCATATCAGACATGGAAACAATTACTGGT
CTCCATGATCTGGAAGATAGGAGAGACACAAAGCTCCTCACCCAGCTCTC
CAAATACCACCACTTTAAAGAACAACCCATGCACAGCCGACTGCAGAAAC
CCCAGAAGGCTAGACTAAAGAGAACNTGTTTTATTAAGAACGCAAATGCC
AAGCTCGCTGTCCTTAAACTCCCTCCCATAATACCAAATGTTCCACTTAA
ACCTTACAACGACTGCCCCNCTTGGCTTAGGGATAGCCTACCAACAGTCA
GAACCACTGTAACAGGGGTCTCCTCCAAATCATCAATGAGCAGCACTGAT
ATGAAATCAACTACAGAAGGAGAGATCAATAGACTTTATCCACACCAGAG
TTGGATTCGAGTGTATACAGATGGTTCAGCCAAGAGAGCAGTAAGAGACG
GAGGAGGAATATACATAGAATGCCCAAATGGTTTAAAAATCAACCAGGCT
GTACCAACAGGTTCATATTCCTCCAATTACAGAGCAGAGGCAGAAGCACT
TCTAGCGGCATGTTCTTTCCTGAATGGACAACAGCACAGCAAATATAGCA
GAGTGGTCTTTCTGACTGATGCTATGTCAGTTCTACAAGCAATTGTTAAC
CCAAAAGACACTCAGTTTGTAGACTTGACGCAACAGCTGATTTACTTAGG
CTCTTCAGTAGAACAATCTGTACTGCAGTGGATTCCAGGTCACTGTGGCT
TGGAAGGCAATGAAATAGCGGACAGATTGGCCAGAAGCGGCAGTGACATG
GTACAACCAAATAGCGACTTAACCCACCAAGAGACGAAAACATTAATACA
ATCTAGTATCCAAGAAAGGTGGCTGGATACCCACACCAGATTTTCTCCCC
AAGACTCGCTTCATCGCCTCTCTAGAGAGGGACAGTGTATTATATTCAGA
CTAAGGACAGGGCACAACAGACTTCGTCAACATATGTTCAAATTTTTCGG
TGTAGGAAACACGGAGACGTGTCCCTGCAGCGTGGCACCCGAAAATGCTG
AGCATGTGCTCCAACACTGTCAACTGTATGCTGACAACAGAGACGCAATC
TGGCCTGTTCCAACCACAATGAAGACAAAACTGTATGGTACACGAGAGGA
TATGGACTGCACGATAGCTTTCATAAAGGCTACCGGCCTCCTGATATAAG
TTTTCTGACAGAAGGATCGAAGAAGAAGAAGAAGA
>rnd-1_family-132#LINE/I ( RepeatScout Family Size = 919, Final Multiple Alignment Size = 100, Localized to 1000 out of 1011 contigs )
TAACATGGCTGGAGACACAGACTTTCACCGGCGCATGCTTTCTCAGTGAC
TCGATGAGTATGCTCAGGAAGATAGAGAAGGGCTGGGTCCGAAGACAGTG
GTTGGNGTCTCTACGGCGGTCACGGCTGACAAGGATTAGTTTCATTTTCG
TGCCAGGGCACGCGGGGGTACAAGGAAATGAGCAAGCTGATAGGCTTGCA
GGTAAGGCTACTGTGAAGGCCGGACGAGCCATGGACCAGGCTGATATACT
GAATGCTCTACGAGAGNTAAGACGTTTGCGNGAACCAAGTGANGACTGTG
AATCTGCAACCATGGTCAGACTGCAAGAACAGCATGTTAAAAGGGGTGTN
GCCAGACAAGAGCACTACGCGGGNAGCCAAAGAAGAATAATAAACCAACA
CAGAACTGGTGTCGTCAGCCGCTACACGCTGCGGGATTTACTGAGGAGGG
GATCCGAGCACTTATGGACTGAGTGGTTCGACGTGCAATGAGGATAATCT
GTCGACTAACTAACTAACTA
>rnd-1_family-69#Unknown ( RepeatScout Family Size = 1656, Final Multiple Alignment Size = 100, Localized to 1000 out of 1011 contigs )
AGTAGTTTGCCATTGCTTTCTGAACGGTCAGCTTCTCGGTACCACTGTCG
AAACCAACGCA
>rnd-1_family-120#LINE/RTE-BovB ( RepeatScout Family Size = 975, Final Multiple Alignment Size = 100, Localized to 1000 out of 1011 contigs )
TAGAAATGATATTATCAGACAGACTGTAGGAACAACACCATGCAGCAAAT
TCATTGAGAAACAGAAGATCAAATGGTTTGGTCATCTAGTAAGAATGCAG
CCAGAACAACTACCAACGCAGGCGCTACACATGAAAAGATCTGAAGTGAA
AGCAAGAGGCCGCCCTAGGAGAANATGGATTGATGACATTAAAGAGCTTC
TACATCGACACGGAATGACAATAGCCATTGCTGCCCATCAAGCAATGGAT
CGCAAACTGTTCCTCCCCACGACGCTTAACGGCAGAAGTGGAAATTGATG
ATGATGAT
>rnd-1_family-184#LINE/RTE-BovB ( RepeatScout Family Size = 561, Final Multiple Alignment Size = 100, Localized to 1000 out of 1011 contigs )
TGAAATGCGCTGTCTCCGCAAGGTCACTAACAACACAAGAAGAGACAGGG
TTACGAATACCAGCATTAGAGAGAAAGTTGGAATAAGACCATGTCTGGAT
TATATTGACAGACAAAGAATGAAATGGTTCGGCCATCTAGTGAGAATGCA
GCCAGACCAGACTGCATATGAGACTTTTTACAGCAGAACATCTGGGAGGA
AGGCGAGAGGAAGACCAAGA
>rnd-1_family-445#LINE/RTE-BovB ( RepeatScout Family Size = 111, Final Multiple Alignment Size = 100, Localized to 1000 out of 1011 contigs )
GTGACTTGGGGTCAAGACCAGAAATCATGTCTAGGATTGCCCAGACAACA
TCAGTCCTTGCCAAGCAGCAAACATTATGGAGATCCAAAAACATTTCATG
CAAAACTAAGATTCGATTGCTCAGAGCACTAGCTATTAGTACATTTACAT
ATGGCTGTGAAACGTGGACCTTAACAGCTGAACTCGAAAGGAAGATACAA
GCATTGGAAATGCGATGTTTCAGAAAAATTCTTGGCATATCATACAGAGA
CCACATCACAAACGANGAGGTTCGCCGTANAATTATNCAGCACATTGGCA
ACTATGAACCTCTTTTAACTACAGTGAAAA
>rnd-1_family-433#DNA/TcMar-Mariner ( RepeatScout Family Size = 119, Final Multiple Alignment Size = 100, Localized to 1000 out of 1011 contigs )
AAGTCCGATCTGGTCGTCCTGTTGAGATTGCAACAGACGCATCCGTGCAG
CGGGTGGAGGAGATGATTAGAGGTGACAGGCGAGTAACGGTTGACTCTGT
AGCAGCTGCACTAGGGTGCTGACATGGTTCAGCATACAACATAATGCATG
ATCGATTGAAATTTAAGAAAGTGTGCTCAAGGTGGGTACCCAGACAATTG
ACGGACGAACACAAAATGAACCGATTAGGCCTGTCCTTGCAGCATCTCTG
TCGATACGCAGATGAAGGAGAAGACATGCTGAACAGGATTATTACTGGGG
ACGAATCATGGGTGCATCACTACCAGCCCGAATCAAAGCGTGCTTCAATG
CAATGGAAACATCCTT
>rnd-1_family-39#LINE/RTE-BovB ( RepeatScout Family Size = 2542, Final Multiple Alignment Size = 100, Localized to 1000 out of 1011 contigs )
GCTCAAGCAAAGGCAGCATTTTACAAAATGAAGAATATTTTATGCAATCT
TTCTTTGTCAATTGAGACGAGAAAGAGAATTCTTAAAAGCTATATAAATC
CTATCTTGATATACGGAAGTGAATCATGGACAGTTGGTAAATTAGTGAAA
ACTTATTTGGAAGCTGCGGAGATGTGGTTTTATAGACGAATGATGAGAAT
ACCCTGGACAGATAAAAAGAGTAATGAAGACGTCTTGAAAGAAACTGACT
CACGAAGAGAACTGATTGCCCACATCAGAAAGAGACAATCTACATTCTTT
GGTCATGTGATGAGAAGGAGAAAACTGGAGTACATCGTGACGGTAGGAAA
GTTGGAGGGGAGGAGAGGCAGAGGGAGACCGAGAGAANAGATGCTGGACA
GTTTGACATCATGGCATGGAGGATCATCTGTGTCAGAGTTGATTGAAAGT
ACACGAGACAGAAGGTTGTGGATAGACATGACTACCAACGCCACACGGCA
TGGACTTTAAGAAGAAGAA
>rnd-1_family-133#LINE/RTE-BovB ( RepeatScout Family Size = 919, Final Multiple Alignment Size = 100, Localized to 1000 out of 1011 contigs )
GTGGTTCCTGAGANGAATGTTGCGAATACCTTGGACNGCCAGAGTAACTA
ACAACGATTGCCTGGAAGNGGCTAATGAAAGTAGANCNTTATATACAACA
ATGAGAAGGAGACAAACACTGTTCTTTGGTCACGTGATGAGAAAAGGGGC
ACTGGAAAATATCGTGACGACTGGAAAGATCACTGGTAGAAGAGGCAGA
>rnd-1_family-142#Unknown ( RepeatScout Family Size = 855, Final Multiple Alignment Size = 100, Localized to 1000 out of 1011 contigs )
GGTTCTTTATTAATATCCTACCCCAGATGACGTCACAGGACAGTCCAACA
TTTTAGAGGGTGGTAAGACTGGGTTTCCCGGCTTTCTGATGCTTTTAACG
ACCCCAAAACATCTAGAACTGGCCCTAACCCCAACCCACCTACGTCCCAC
GAGAGAGTGCAGCCTAGGTCCCACGACTGCATGCAGCCTAGGTCCCACGA
CTGCATGCAGCCTATCTACCACCCCCTGAAATATTAGACTGTCCCGTGAC
CTGTGGATTTCCCCTGTTTGGGGTAGGATATTAATAAAGCACCA
>rnd-1_family-256#Unknown ( RepeatScout Family Size = 360, Final Multiple Alignment Size = 100, Localized to 1000 out of 1011 contigs )
CCCGCCCATATACACACTAGCTCACTTCTGATTGGTAGTTCCTGAGCCCG
TNACCTTNGCACAAGGTTACGGGGGTGTTCCGCAATGCCGTTGATATCGC
GTGTTGTATATTTCAGCACGCCAGCGCTTTTAACACTCCAAAAACATGGA
GAAACTGGGTCTAACACAACCCCCCTAGAGAGTGCTGCAACCTATGTCAC
AGGCATTCTCTTTCTCGGAATGAAAACGTAAATGCAAGACANCGCAGAAA
GCAAACAACAGAGCGGGACACACCCGTAACCTTCAGGAAAGTCGACCAGC
CCAACAAACTTGTGAATGAAAAGTGACCTACTCTGTTTGGGGAGACTAAC
GTGAACCTAA
>rnd-1_family-253#Unknown ( RepeatScout Family Size = 367, Final Multiple Alignment Size = 100, Localized to 1000 out of 1011 contigs )
GGGTGTTTATCGCTCGTTGTGCGGTCCTGGTGGGGTTGAACGTCACTCAC
TCA
>rnd-1_family-259#LINE/RTE-BovB ( RepeatScout Family Size = 358, Final Multiple Alignment Size = 100, Localized to 1000 out of 1011 contigs )
ACATCTTCTNCCCGTCTTTAATTCACCATAAAGGATGTCCTTAGGGACTC
TGCCATCCTCCATTCTCCAGGTGTGACCCAGCCACCTGAGCCTTCGTAGA
CTGAGCATTGAGAAGACTGTTGTAGTACCTGCTCTTTCCAGTACCTCAGT
GTTTGTGATCTTGTCCTGCCACTTAATGCCAAGTATTCTTCTTAGGCATC
GCATGTGAAAGCTATTNAGCCGTCTCTCCTGGTGCGAATAGGTTGACCAA
GTTTCACTGCCATAAAGCAGAGTGCTGAGAACACAAGCCTGATAGACAAG
GGTTTTTGTTTTAATCGTGAGCTTTCTGTTCTCCCAAACTCTCTTTGTCA
ATCTGCTCATTGTTGTTGCTGCCTTACCTATCCTGATGTTGATTTCTTGG
TCCAGCGATAGTTTGCTATTCACTGTGGAACCCAGATAGGTAAAATGGTC
NACTGTCTCCAGCTCTTCACCGTCAATGTAGACTGTAGGTCTGTCATTAA
CACCTTGCACCATAACCTTTGTCTTCTTTTTGCTGACTGTTAGTCCAAAT
TCACAGCACGCATCAGCAAAGGCAGATAGTAAACATTGCAGCTCCTCCTC
TGAGTGGGTGGTTATTGCNGCATCATCTGCAAACAGCAGCTCTCTGATAA
GTACCTTTCTTATCCTGGTTTTGGCCTTCAGCCTGCGAGCATTGTAAAGG
CTGCCGTCAGATCGAGAATGGATGAATATACCACCCTCCTGATCTCGAAA
GGCATGTTTCAAAAGAAGTGAGAAGTATATTCCAAAGAGGGTAGGAGCAA
GTACACACCCCTGCTTCACTCCATTTTTGATTACAAACTCCTCCGATGTT
ACACCGTCAAAGTTGATTGTACCTTTCATACCTGCGTGGAACGACTCAAT
AATGCTCAGTAGGGTAGGTGGACACCCAATCTTCTTCAGCGCGTTGAACA
GACCTTTTCGACTAACCAAATCAAATGCCTTGGTAAGATCAATAAAAGCA
ACATACAGTGGTTGATTTTGTTCGCGGCATTTTTCCTGCAACTGTCGTAA
TGAAAATATCATATCAGTGGTAGATCGGTTCCCACGAAAGCCACACTGNG
ACTCTGGGTAAACGCGGTCCCCCAGGATCTGGAGTCTTCGCAGAACAATT
CTCGCAAGCACTTTTCCAACAGTACACAGCAGTGATATTCCCCTGTAGTT
ATTGCAGTCGCTCCGATCACCCTTGTTCTTGTACATAGTTATGATGCTTG
CGTCTTTGAAGTCTTGCGGAACCTNTCCCTCTTGCCAGC
>rnd-1_family-292#LINE/RTE-BovB ( RepeatScout Family Size = 283, Final Multiple Alignment Size = 100, Localized to 1000 out of 1011 contigs )
CCTCTTCATTCTTATGATGGATGATGTCATCAAGACCTGTAAGGAGAAGA
CAAAGAAGTACTCTGTAGGGTACTGGAAGATGAGACCAATCTGTATATCA
GAGCTGGCNTTTGCAGACGATGTGGCCCTGATAGCTAAATCAGAGGCACA
CCTTCAGTCCAACTTACTTGTCTGGAAGGAAGAGCTTGAAAAGAGAGGGA
TGACCATCAGTATCTCCAAAACTAAAACCATGGTGATCTCAAGAGAGGAG
AAGAAACACCAGATCATGATGGGACAGTATGCGTTGGAGCAGGTTAACCA
GTTCAAATACCTTGGAGTTGTATTAGACCGAAACGGAGGCATTAAGACTG
AGCTGGCTACACGAAAAGCAGCTGCTGGGAGACTCTTCCAGGCCATAAAC
CGAGGGTTTCTTAGCAAAAGAGAAATTGGCAAGAGGACGAAAATGGCTGT
TTACCGCTCTACCTATGTACCAGTCCTGACCTATGGGTGTGAGTCATGGG
CAATGACAACAGCTCACAGAAGCCAGCTNCAGGCCTCGGAAATGAGATAT
CTGAGAAAGGTGGTCCAAGTGACAAGAAGGGACAAAGTCCGCAATCAGAC
AATACGTCAAGATCTTGATACCCAGNCCTTACAAACCCGAGTGGATCAGT
CACAGTTACGATGGTTTGGACATGTATGCAGAATGGGAGAAAATCGGCCA
CCATGGCAGGCATGGGAGGCTAAGAACCAGGGAACCAGACCTCCGGGACG
ACCCAGGGTGCGCTGGGAAGACAACATCCGACAGTCCCTGACTGACAGAG
GACTGGAATGGAACAAAGCCAGAAAGAAAACTGCTGATAGAGACGTCTGG
CGATCTCTCTGGCAAACCTCTACACCCCAAGGTAGAAGAGGAGCGACTAA
GTAAGTAAGTAAG
>rnd-1_family-3#LINE/I ( RepeatScout Family Size = 6859, Final Multiple Alignment Size = 100, Localized to 1000 out of 1011 contigs )
TTAGTTAGTTAGTTAGTTAGTTAGTTAGTTAGTTAGTTAGTTAGTTAGTT
AGTTAGTTAGTTAGTTAGTTAGTTAGTTAGTTAGTTAGTTAGTTAGTTAG
TTAGTTAGTTAGTTAGTTAGTTAGTTAGTTAGTTAGTTGGGTTATCCTCA
TTGCACTCCGGACATGTCCATAGGTGCTCAGATCCTCCCCTCAGTATGAA
CCCCAACGTCCGATGGCTAATAGTACCAGTTCTATGTTGATTAACAAGTC
TTCTGGCGTGTCCGGTGTGCGTCTCGTTTTTTGCTGTGCCGATCTTAATT
CCCAAGTCTGCCATTCTGGCGAGTGATGTGGATTCACTGCCACCAAAGTC
CTCTATCCTTCCCATTTCTCTGAGGGCATTGATAATATCAGCATGATCCA
TAGGCTGACCGTCGGTAGTGATAGCGGATCCAGCCAACCTGTCAGCTCTT
TCATTTCCATCGACGCCTGCGTGTCCCGGAACAAAAATAAAGGTGACTCC
ACGCACAGTGGACTTCTGTAATGATTCAAGCCATTGTCTTCGCACTGAAC
CTGCCTGAACCCTCCGGATCATACTCATTGAATCACTGAGTATACACACG
CGGGTGTATTTTTGTGTTTCAAGCCAGGCAAGCGCTTGCGTCACTGCCAT
CACCTCCATCGTCATGCTGCTGGTTGTCATGGAGAAGGCGCCGTTGGCTT
CTTTGACTGTTCTGCCCGCTGAGCGTGCTGTAAATGCCCATGCGCTTCTT
CTTTGGCGTATAACGGATCCGTCTGTATAGATTATTGCATCTGCTTCGTC
TGAATTTTCACCGATGAGAGCGTTGACCTCTGCATTAACAGCAACAGGAT
TCTCTTCTCTACATCGCCTGTTGAGTGTGACAATACAGGAAAATGTACAA
ATAAACGCCTGAGGCACAGGTATCCATTCTGCACCAGGTATGATGTCGGT
TAGGCTGCATATTTGCCTAATAACATCTTCTGCCCGACCTAGCCACGATT
TCCCCCTCTTCAGTCTGTCGCCCTTTTCACTAAAAAGCGCTTGATGCAGT
GGGTGTTTCTTATCAGCGCATATTTTGAGGTATGCCCGAGCCCTCCACAT
CCTGATCCTTTGGTTCATTGTTGGAAAGTCAAGTAGATACCTCATTGCTC
CACAGGATGTGTCTCTNGTACATCCCAAAATAATGCGCATGGCTTCATTT
TGCACCTTTTCGAGTCGTTCAATCTGGGTAGCACTGACAGTGAGGATGGC
CAGAGCGTATTCAATGGGGGAAAGGACCAGACCGTAGAATAGAAGTATTA
GTAGTCTTTGCTCGATATTGGAAGCAGCCATAATCCTCATTGCAGATAGA
CCTTTGCGTGCTTTTGTTATCACATGGTCAACGTGTTCCCTGAATGACAA
GCTGCGATCGAACCTCACCCCGAGAAACGTCATAACGTTGGTTCTGATCA
ATACATTATCACGCATTTTCACTTCTGGTAAGTCCGACTTGACAATGTGA
TTGTTCAAAGAGAACCATGACACTGATGCCTTCGAAGGATTGACATAGGC
ATTGGAACCATCACACCAGGCGGCAATTCGATCGAGTTCTTTGTGCATNG
TGCTGGCGATCTCCTGTCTATCACGCCCTCGTCGATAAATCAAAATGTCA
TCAGCAAATGACAAAGTCCTTCCCTTTCCATTCAACTGCTGCTCAGTGAT
CATCACCGTATAAACGTTGAATAAGACTGGTGATAGCGGTGATCCCTGTG
GCAAGCCTGGACATATCGTTTGCGGTTCTGAGGACCAGCTACCACATCTT
AGTACAATCTTTCTCTGGAACAGGACCGCAGCAATCCAGCGGATCAGAAT
AGGATTAACTTCTAGTTTAAGCAGTAATTGCATTAAATAATCGTATGGTA
CTTTATTGTAGGCATCTTCTAAGTCCAACACTGCCGCACATGTCTCTTCT
TTAATCTGAAATCCCTCGTACACATC
>rnd-1_family-338#RC/Helitron ( RepeatScout Family Size = 206, Final Multiple Alignment Size = 100, Localized to 1000 out of 1011 contigs )
ATATGNTGCGTGTTCTAAAGTCGGCAAACCAGACTATCTCTATATCTGTG
CAGANAATGATTGCGACATTAACCATATTAGACACGTGCGATTTCTATTN
TCTTTCTTTT
>rnd-1_family-342#Unknown ( RepeatScout Family Size = 198, Final Multiple Alignment Size = 100, Localized to 1000 out of 1011 contigs )
ATTCATGTAATGTGCTGATGAAGGCTCTCTAGCCGCAACGTTCACTTGTC
GTTTGTGTTTGTGATAATG
>rnd-1_family-106#LINE/RTE-BovB ( RepeatScout Family Size = 1114, Final Multiple Alignment Size = 100, Localized to 1000 out of 1011 contigs )
ATACTAAATCGACAAAAGAGAAGAAGCTTAGTAAAAGACGCAAGAGTAAT
TCCTAACATCTCTTTAAATACAGACCATCGACCGCTGATCGTATATCTAA
GCGAAGCAACAATTAACAAAAAACCAAAAACATCAGTACGTACCTCAATG
ATTGACATAAGACACCTAAGCAATCTAGACAACCAAGCAAAAGTACAGGC
AGAAATGACGGCGAAGATGGCTGAGCTAATAACATCAAGTGACAATGTGG
AAGCTGCGTGGCAAAAATTTAAGAACACTCTTCTGAACTGCCTAACAACA
CTCTGTGGTACCAGANACACGGGCAAAGGAACGTTCAGGAAAAAAGGTAC
NGCNTGGTGGAATGANGAAGTNAAAGAAGCAGTGTCAAATGTAAAAAGGA
GCAATGTTTCAAGANATGGCTAAAATCCCGCTCAGATGACGAAAAGGATT
ACATCAAGTACAGATAACTGCGAGGAGACAATCTGCAAGAGAACAATTAA
GAAATCCAAAGAGGAATCNTGGANAAAGTATGGNGAACACCTNACNAAGC
TNTGTACNGAATCACAGTAGACAGTTTTACAAAAGCATTGCGAAAGCGAT
GAGACTAAGAGANGAAAGCTCCANTCCAACCATCAGTNATATGTCAACGA
TAANAAAGGCAAACCCATTCAGCCGAAAAGAAGATCAGAGAAAGATGGGA
AGAATATTTTCAAGAACTTCTGAACCCGTCGGGAGTACATGAGGAAACAG
TAGAATTCCATTCAAGGGCCCCAGATGTACAAACGAGGACCACACANCCT
GCGATAATCGAACGAGAAGTCAGAGAAGCNATCAGAGCAAGTCAAAAGAA
CAAGGCANCNGGTATCGACGGAATAACAACAGAGGCGATCCAGGCTTGNG
GGGAAACTGGAGTCACCTGGCTGNNNAGAATNTTCAATANAGCCTGGGAN
GAAAGAAANGTACCAGTNGACTGGCAAAGAGCANTTATAGTNCCNATNTG
GAAAAAAAAAGGNAATAAGCGAGANTGTGGAACATTACAGAGGNATNTCT
CTACTAAGCCACGTAGGAAAAATGTNTGCNAAAATNCTAGAACGAAGAAT
NAGANCCGTNGTAGAACCNCTACTGAGTNCANCACAGTTCGGNTTCAGGA
AAGGAAGAGGNTGCACTGACGCNATATTTGCTCTAAGACAAGTCTGCGAA
AAGACAATCGAATACAGACACCAAATGAACGTCGTCTTCGTAGATCAAGA
GAAGGCTTTCGACAGNGTGGACAGAGATNTACTGTGGAAAGTTCTTGAAG
ACTACGGTGTAAATGGGNCAATTATTAGACNGCGTCAGAGCCATCTATGG
ACAAAGTGAAAGCGCCGTAAGAACAAGAGCTGGCNTCACAGACTGGTTCC
CAGTNACATCAGGAGTAAGACAAGGNTGTGTACTATCACCNTTACTTTTC
ATAACATNTATGGACAATATTAATAAAATAGACGCAACACCAACAGACGT
CGATAAACAGGAGGACTTCAATGAGCTGCTCTTTGCCGACGATCAATGCA
TATTTCACAGTGATAGTAAACAGCTGCAAGACCACATGAACCTACTACAC
GACAGTTGCCTCAAGCATCATATGAAGATCAATACTGAAAAGACAGAAGT
CATGAGCATAAGTAGAGAGCAACAGACCATCGACATAAAGATTCTAGATC
ACAGCCTAAAACAAGTGCAAGAATTTAAATACTTGGGAAGTATCTTTACA
TNCGATGGTAAAATAGACAGAGAGATCGAAGCAAGAATCCAACAAGCCAA
CAATGTCGCATACCAGCTTGCCCCAATTTTAAAACACCCTGCTGTCCCAG
CTGAGACAAAAAGACAAATTATAAATACAATCTTTATACCGACATTAGGT
TATCAATGTCAGACTTGGACATTAACAAAAGAACACGAGAGAAGACTAAC
CACCTGTGAAATGAGATGTTTGAGAATGGCTGCGAATAAAACCAGAAGAG
ATCGAGTGAGAAACGATGTGATTACAAGAACTATTGGAACCATACCCATC
GTTAAATTTATTGAGAAGCAAAGAATGAAATGGTTTGGTCACCTAATGAG
AATGGAACCAACGATGCCAGCATCAAGAGCATACAACATGAAAATCGAAA
CACCAAGAGGCAGGGGAAGACCAAGAAGAAGATGGATTGAAGGAGTCACG
GACAACTTGAGACTTCATAACATCACGGCATATGAAGCGACTGAGCGCGC
CCTGGCTCGGTTGCCGATCATCTGATAGACTGCGACGCCTAGCGGCACAA
GCAGATTTTGACAAAAGAAGAAGAAGA
>rnd-1_family-211#DNA/hAT-Ac ( RepeatScout Family Size = 485, Final Multiple Alignment Size = 100, Localized to 1000 out of 1011 contigs )
CAGAAACGGGTGTAAGGTAACCACTATTCGTATTCGGCCCGACCGCAACT
ATTCGGCCGAATACCGAATAGTTATTAGGTCCACTATTCGGCCCCGAAGC
GAATACGAAGCGAATATTCGGTACAGCCCTA
>rnd-1_family-159#Unknown ( RepeatScout Family Size = 702, Final Multiple Alignment Size = 100, Localized to 1000 out of 1011 contigs )
CAGGGTTCATAGCCAAATTTACCAATCAATTTCAAGGCTTTTCAAGGTCT
CCTTAGTTTTTTTCAAGGTTGTCTCGGTGTAATACTGAAACAAGATTTTT
GCCTTGTTCAAGGGTGTACCGAGCACACAAGGTACTTCATTCGTGCCACA
CGTGTGGGTATACCAGCACAGATATCATCATCATCATCATGTAGCAGGTC
CTTTGCAGAACGTCGCTCTCATCACGGTCTGCCTGAAAGAAACTCGGTCT
CTCGCCAGCTCTCCCGCCTCATGTACTTTCATACTCAAGGAGTCACTTAT
ATCCTGTGC
>rnd-1_family-305#LINE/I ( RepeatScout Family Size = 259, Final Multiple Alignment Size = 100, Localized to 1000 out of 1011 contigs )
ACATACTAGAAACTAACAAAAAAGCTATGAGAAAACAAGGTGTGATGAAA
AAATTAGCGGGTACCACATGGGGNGCNAACTCCAGAATCCTAAAACAAGT
ATATACCGGAGCAGTCAGGCCAGCCNTGGAATACGCNTCCACCGTCATGG
GCNGCAGCAGCCCANNCAACAATGGGAAACAGTACTGGACAAGGCGCAGA
ATANGGGNCTGAGGACNGTTCTNGGAGCCATGAAANCCACNCCCATCGGA
GAAATGGAAAAGGCAGCCGATATCANCCCCTTAGAAGNNAGAAGACAGGA
CAAAAGCNNTTCTACATGCTGAGAAANTGAAGAGAATGCTAAGCCACCCA
CTGCACTNNAAATTGGCAGCCAGGACAAAAAACAGANTGAAGCGCACGAG
CCCAAACCATCTAACGAAGGAATTTGGAAAGTCATTCTCTTCACTACTTA
ACCAACAATGTACACCTGAAGAGCTATCTTTCGATCTCTGGGACTCCGAA
TTATTGACACTCAATGTGTCAACATCCATCCCGAACCTGGGAAACAAAGA
TGCTGAGCCCGCTTTAGTGAAGAAAGCACTCACAATGGAACACCTCAACA
ACATGTTCCCACAAGAACAATGGGTCAGAGTCTATACAGATGGGTCNGCA
GAAAGNGCAGTTAGAAATGGTGGNGCNGGAGTGTACATNGAATNCCCAGA
TGGTACTAGGGATAAGTCCCTAGCGTACCAACCGGAGAAGTACTGCCCTA
ACTACGANGCAGAANCTCAGCGCTATCGATGGCAGCACAGTATATGAACA
ANCTGCAAATCACCGCTGGCAGNATGTGGTNTTTCTCACNGACTCACTGT
CAGCTATACAAGCACTCGAGTCCAGGAAACTACCGACAGCACACTGCAAA
GTCTGACACAGGAACTTAGCTAGCTTCAGCGAAGGCAGAAATTCACTTGC
AGTGGATNCCGTCTCACTGTGGCGTGCNAGGAAATGAGAGAGCNGACGNN
TTGGCCAAGGAAGGCAGCGACAAACCACAGACCTACCAGCCACTATCTTT
NCCAGAAGTCAAAACNCTCATTAAGAGAAAATCAGAAACAGATCGGAAAA
CCAACACTGGTTATAACCACGAAAAAGATTTTCTNAAACACTTGAACAGA
ACAGACCAAGTCACAGTTTTTCGCTTACGCACTGGACACTGCAGACTCAA
TAAACACTCACATAAATTAGGTATGAGC
>rnd-1_family-264#Unknown ( RepeatScout Family Size = 347, Final Multiple Alignment Size = 100, Localized to 1000 out of 1011 contigs )
TGCAGCCTAGGTCCCACGACTGCATGCAGCCTATCTACCACCCCCTGAAA
TATTAGACTGTCCCGTGACCTGTGGATTTCCCCTGTTTGGGGTAGGATAT
T
>rnd-1_family-169#Unknown ( RepeatScout Family Size = 648, Final Multiple Alignment Size = 100, Localized to 1000 out of 1011 contigs )
GCTATCCTCCGAATAACGGTCGGCAAAGATGGCGGCCGCAAAATATCCTT
TCGAGCCACAGTCACGTGTCAATTGCGCACTTCCGGCGACTACCGCNCAC
GCGGCGTGGATTGGGGCTAAACTAGATGGCTAGGACTCACGAGCAACAGC
TGCAGGAGATGCGGAAGCTGCTGCTCGTGAGTCCTAGCCATCTAGTTTAG
CCCCAATCCACGCCGCGTGAGCGGCGTGGGGGA
>rnd-1_family-134#LINE/RTE-BovB ( RepeatScout Family Size = 901, Final Multiple Alignment Size = 100, Localized to 1000 out of 1011 contigs )
GAAAACATAACACAGAAGAGATCTGGTGGCGAGACCCCCAGGCCAGGCAG
ATCAGATAACACTGGGGAAGAGTGTGATACAGGGGTCAGTACTAGTAATC
GTGATGACGGAGTTAATCCTGACTGTGTTACCAAGGAAATCCACTGTGTC
AGACTAAGAAACAGAATGCGAATAGGAACGTGGAATGTGAGAAGTCTGTA
TGAAGGAAAGCTTAAAGTAGTATGTGATGAGATTGAAAGATTAAATATTC
AGATCTTAGGAATTTGTGAACATCGTTGGAGTGGCAAGGGACATTTTATC
AATGAATATGGAAGCTTTTTCGTATATTCTGGTAGAGATGTAAGAGGCCA
GAGCGGAGTGGCATTTTGTTTAGATAAAACAACAGCAAAAGCTATTATGG
GATATAATCCAGTTAGTGATAGAATCCTAACTATCAGACTTAAAGGCCGT
CCAAAAAACATAACTTTCATGCAGGTATATGCACCAACTTCAACAGCAGA
GGAGGGCGAAATTGAAGATTTTTATGCCATACTGCAAGACACATTAAATA
AAATTAATCAGAATGATATAATAATAATAATGGGAGATTTTAATGCTAAA
GTAGGTACAGGCAGAGCTGAAAATGAGAGACACGTTTTAGGAAAATTTGG
ATTGGGTAATAGAAATGAAACAGGAGAAAAATTGATTGAATTTTGCATAG
AAAATGAATTAACAATAGCTAACACACTTTATAAACAACACCCTAGAAGG
CTTTTCACATGGACATCCCCTGACGGTGTTACCAAAAATCAGATAGATTA
CATTTTAATACAAAGAAGATGGAGATCGAGCATAACATCTGCAAAAACCC
TGCGAAGTGCAGATTGCGATACAGATCATCAGTTACTAGAAGCAGATCTG
AAATTAAAACTCAAAAAGCTTACCCGAGGACCAAGGCCATTTCGATTTGA
TCTCACAAAAATACCAGATGCATACAACGTAGAAGTGAAGAACCGTTTTG
AGGTCTTGATGTCTGTACAAGAGGAAATGACACCTGATGAACTGGCGGTA
CAAGCTAGGGATATCTTGATAACAGCAGCTAAAGACTTAATACCCACCAG
GACTAAGCAACATAAACCATGGATCACACCATACACGTTAGAACTAATAA
AACAACGAAGGGAACTGAAAAAGAAAGAAGAAACCAATGACAGTAGGATG
AAGTATAAATTTTTAACACGAGAAATAAGAAAGCACACAAGAAAGGATAA
AAATCAGTATGTACAAGATTGCTGTATTAAAATAGAGCAGCATCATAAAA
ATGGAAGAGATTACGAAATGTTCAAGGAAATGAAGTTATTGACAAGAAAT
TTTCAACCTCAGTTAAATGTTATTTGTGACAAGTTGGGAAATACTTTAAC
GGAATCTAGACAAATTCTAGGAAGATGGCAGGAATACTGCAGCGGAATGT
ATGATATGAATGACAGTGAGGATATGAATGATATACATGAACCAGTAACA
GTAGAGGCAGAACCTGAACCTTCATTAGATGAAATTCCATGGGCAATAAG
GAGCCTGAAGAANGGTAAATCACCNGGNTGCGACGAGATACCAGCNGAAC
TGATTAAAGCGGGAGGAGAGGAAAGCGTANAAATCTACCATGCATTATGC
GAAAAGATATGGAAATATGGTATTTGGCCAAAAGACTGGAAGAGAACTAT
CTTCATTCCAATACCAAAAAAGGGCGACCTGAAATTATGCACAAACTATC
GAACTATCGCCCTGATCAGTCATGCAAGCAAAATTCTACTAAAAATTATA
ATGAGAAGACTGCATAAGAAAATGGAAGAAGAGATTAATGTAGCTCAGGC
TGGATTTAGACAGGGAAGAGGAACAAGAGATCATATATTCAACATGCGTT
TAATAATAGAGAAGTGTAGAGAATTTAATGTAAATCTGTTCTTATGTTTT
GTGGATTATTCAAAAGCATTTGACTGTGTACAACATCAGAAGCTTTGGGA
AATCATGAGGAATATGGGCTTTCCATCGCATATAGTGCAGCTCATTAAAA
TGCTCTATCAAGACCAACAAGCAGCAGTCAGAATAGATGGAGAGACATCA
GACTGGTTTGGCATCAAGCAAGGAGTCCGTCAGGGATGCGTGCTGTCACC
GTATTTGTTCAACCTGTACGCCGAAAATATAATGAGAAATGTAAGAGATG
ATATAAACAAGGAACAATATGATGCCCTAAACATCGGTGGTCATGAAATA
CCAGAAATTCGTTATGCTGATGATACAGTATTACTATCAACATCACAAAA
TGGTTTAGAAAACTTATTAACCTCACTCCAAAGAAATAGTGAAAATCATA
ACTTATTTCTTAACATAGCAAAAACAAAGATAATGCATACAAACAAAACT
GCCATGGAGAAGGAAATATATGTTAATGAGGAAAGATTGGAAGTGGTGGA
AAATTTCGAATATCTTGGGTCACTGGTTACCAACAATGGTGACACAATGA
AAGAAATTAAACGGCGACTATCAATTGCTCTTCAAAGACTAAAACAACTG
AATAAATTATGGAATTGTACAGATAGAATTACAAAGGTCAGATTTTTAAG
AGCATGCATCTTTCCCATTGCAACATACGCCTGTGAGACCTGGACACTTA
CTAAACAAGCGGAACAGCGCATAAATGCATTTGAATATAAATGTTACAGA
CAGGTTCTAAGAATATCTTGGGTAAAGAAAAGAACAAATGCATCCATACT
TCAAGAGCTGAATATTGAAGAGGGTTGGCTAGTAAAGACAATAAAACAAA
GAAAATTGAAATATTTTGGTCACTTGAAACGTCATGGAAGTCTAGAGAGA
ACAATAATGGAGGGGTATATGCCTGGGAAGAGAGGAAGAGGAAGGCCAAG
GAGAAGATGGGTGCAGGATGTGGCAGATGATCTCCAGATGGGTGTATCAG
ACGCAGGACATCTTGCTCANGATAGGAAGGTTTTCCGGAGGGTTGTTATG
GCAGCGAGGTTCCGCGAGGGACATGCTACTGAATGAATGAATGAATAT
>rnd-1_family-250#Unknown ( RepeatScout Family Size = 372, Final Multiple Alignment Size = 100, Localized to 1000 out of 1011 contigs )
CCCCCCAGTTACGGCCCCTGGTACTCCACAGGGTATTTATTCCCCCGGCC
GACACGTGTNGTCATTCTGCTGAGAAACAATCGACCCGGCTGCTTCGAGA
TACCAGCTAAGTGATTTTGTGTATTTGTGTAGTATTGTTTGATTTGTATG
TGCTGATGAAGGCTCCATAGCCGCAACGTTCACGTTTTGTTTGTGTTTGT
TATATTGTGAAGCTTGCTGATATACTTTTCGTTCGGTTTTATATCTTTTC
TTGATA
>rnd-1_family-270#tRNA ( RepeatScout Family Size = 332, Final Multiple Alignment Size = 100, Localized to 1000 out of 1011 contigs )
AGGAGCGGCTGGCCGAACGGTTAGAACGCTGGGCTCTCATGCGGGAGACC
CGGGTTCGAATCCT
>rnd-1_family-46#LINE/RTE-BovB ( RepeatScout Family Size = 2424, Final Multiple Alignment Size = 100, Localized to 1000 out of 1011 contigs )
GTAAATTAGTGAAAACTTATTTGGAAGCTGCGGAGATGTGGTTTTATAGA
CGAATGATGAGAATACCCTGGACAGATAAAAAGAGTAATGAAGACGTCTT
GAAAGAAACTGACTCACGAAGAGAACTGATTGCCCACATCAGAAAGAGAC
AATCTACATTCTTTGGTCATGTGATGAGAAGGAGAAAACTGGAGTACATC
GTGACGGTAGGAAAGTTGGAGGGGAGGAGAGGCAGAGGGAGACCGAGAGA
ANAGATGCTGGACAGTTTGACATCATGGCATGGAGGATCATCTGTGTCAG
AGTTGATTGAAAGTACACGAGACAGAAGGTTGTGGATAGACATGACTACC
AACGCCACACGGCATGGACTTTAAGAAGAAGAA
>rnd-1_family-249#LINE/I ( RepeatScout Family Size = 373, Final Multiple Alignment Size = 100, Localized to 1000 out of 1011 contigs )
AAAAGACAAAGCTTTCACCATCTATCAAAATTGTACTACGCAAAAAACAG
TGACATCCTTTCTAAAGATCCTTCAACGTGGGAAATGATCCAGGCATACA
GCATAGACCTACAGCCTAACTATACAGTCACAACAACAATTCCAGGCATA
GACAGAAAGGCTGAAGAATGTGACCTAGTACTGCATGCAAAGACCCTTGA
ACATGTCTACAACTGTTATCCAAAACCCGAATGGACACACGTATACACCG
ATGGATCATTGGAGGGAGCAGAAAAAAACGGAGGAGCTGGATCGGTCATC
ATGCTGCAAGATGGGACCACAGTAGAAACGTCATGCGCCTCCGGAAGACT
CTCAACAAACTTCAGAGCAGAGCAGCAAGCAATTATTGATTCAGCCAAAG
TGCTTGAGGAAAGAAAAATTAAAAACAGCAAAATTGTTTTCCTTTGTGAC
TGCATGTCAGTCCTCCAGGCGACTCAGAGGGATCCACGAGACAACATGGA
GAGAGAACTGACCCGCCAGCTAAACAGACTCNCAGAAAACAATCAAATCG
TTCTCCAGTGGATCCCGGCTCACTGCGGCATACCAGGAAATGAGTTAGCA
GACAGACTTGCAAAAAATGGAACAAAGGAGAAACAACACACCCATTCATT
GTCATTACCAGAAATCAGAACACTTATCAAGGGAAAATACAAGGAATTGT
GGAGAGAACAAACCAACAGTAAACATCCACAAGACCCCATCAGCAGACTC
AACAGAAAGCAACATACAACAATTTTCCGTCTACGAACAGGACACTGCAG
GCTCAACTACCACATGCATAAAATAAAGACTGTACAGTCCCCACAGTGTG
CCTGTCAGACAGGACCACAAACACCTGAGCACATTCTGCAGACCTGCCCA
CTCTACCTACAACTTCGAAAAGACACCTGGCCTCAAGAGCAAAGTGTGCA
GAGCAAGCTATGGGGAACCATGAAGGACCTGCNGCTGACATGCGAGTTCA
TAGAGGCAACCCACCTGATGGTCTGATCTGAGCATACGAAACCGAACGCA
AAGAAGAAGAAGA
>rnd-1_family-188#Unknown ( RepeatScout Family Size = 543, Final Multiple Alignment Size = 100, Localized to 1000 out of 1011 contigs )
TCGAATTTGTACTTCAGTTATAAAGGATTCACTTATTTGCTTCATTTATG
TAATTGTTACTGTAGTATGCACCTGACGAGATACAGCGAAATATGCCAGG
CAATAAATTGTGCAGTCTATTGTTTGTGTCTTCTTTGTTCAAATTTACAA
CGGGGAAACATTGCTTTGATT
>rnd-1_family-322#Unknown ( RepeatScout Family Size = 229, Final Multiple Alignment Size = 100, Localized to 1000 out of 1011 contigs )
ACGCCTTCACGGCATGACAATAGCCAGTGGCAGCCAACGTGCACTGGATC
GCAAATTATTCCTCCCCACGNCGCTTAACGGCAGAAGTGGTTTATGATGA
TGATGA
>rnd-1_family-304#Unknown ( RepeatScout Family Size = 260, Final Multiple Alignment Size = 100, Localized to 1000 out of 1011 contigs )
TGCATGAAGCCCTGGGTAGAGCTAAGGGTCACAGACTGAAAAGAGGAAGG
TCTTGGATGGCGCAAGCTGAAGACACAATCGGACATGTGTGCA
>rnd-1_family-26#Unknown ( RepeatScout Family Size = 3421, Final Multiple Alignment Size = 100, Localized to 1000 out of 1011 contigs )
AAGTCGGAGTGCATCTGCCTGAGAGGCAAGGAACCAACAGTCTGCATACA
AATGAGTCAGATCTGT
>rnd-1_family-331#Unknown ( RepeatScout Family Size = 211, Final Multiple Alignment Size = 100, Localized to 1000 out of 1011 contigs )
TAACAAATATCTCGAAAACTCCTGTACGGATCAACACGAATTTTTGCACG
TGGCCTTAGATTTCCCATGTCCTTATGATTTTATAATTTACAATTGCACA
GGTGCTGCTGTTTTCTTAAAGCGGCGAATTTCTTTGATCTTTGTTTGACT
AATAATTTGTG
>rnd-1_family-35#LINE/RTE-BovB ( RepeatScout Family Size = 2667, Final Multiple Alignment Size = 100, Localized to 1000 out of 1011 contigs )
CCTCTCCCCCCTGCTGCCTTGCAGGGTAAGTCTCTTTAGACAAAGGCTAT
TGGAGTCAAACCATATACAAACCGGCGGAAGGCAAGGGGAAACCACCGCT
GTACTATCCCAAGAAAATCATGCCTCAAAATAATACGTATTCAGATAACG
ACGTGAATGGGGATTCCGGTGGAATCACCTCGTCCGGTAGGGAGCATCAT
GTTCTACGGGTGATACCCGACCGTCATCCAGCTACTGTAGAAAAAGTAAA
TGGTAGAAACATCATGAACATTGGTACATGGAATGTCAGAACACTCGTAC
AAAACGGAAAGCTGGATAACATCAAGATGGAAATGAAGAGAATGAACATC
AACATATTAGGAATTAGTGAAATGCGATGGCCAGGAGCAGGNGAAAAGTA
TTCAGATCAGCACAGAATTATTTACTCGGGTGGGAAGGAATATAGTAAGG
GAGTTGGTATTATTTTGGATCNAAAGAACTCAAAAACTGTGAAAGGATTT
TGGACAATATCAGATAGAGTACTATTAGTAAAACTTCGCGGCAGACCGTT
TGACATCAACTTAGTACAGATTTATGCCCCAACAGCAGATAGTTCAGAGG
AAGATATTGACGCATTTTATGACGAGTTAGACATGGCTGTTGATCAATGC
AAAAATTGTGAAGTAACAATGGTACTTGGAGATTTCAACGCGAAAATAGG
AAGTGAAAAAGTGTACGGAATAACGGGTGGCTATGGCCTAGGAGAAAAGA
ATGTGAGAGGTGACAGATTAATAGCATGGGCTGAGTCGCGCAGCATGATA
ATAGGTAACACCTGGTTTAAAAACACCATCCTCGAAGATTGTGGACTTGG
AAAAGTCCTGGTGATAATGTCCGCAATCAGATTGATTATATTTTGATTTC
AAGAAGATTCCGGAGCAGCTTAGTTGGAGCAAAAACTAGACCAGGGGCAG
ACTGCTTTAGTGACCATGTTCCAGTTGTAGGAAAAATTAGAATAAAACTA
AAGAACATTAGAAAAACACCACAGAACATCAAGTTAAATTTAGGAATTCT
TAGAACGGATAAAGAAATTAAGGANCAGTACAACGTCACTGTACAAAACC
GGTATAATGCAATGGAAATTATACAGACTATTGATGAACAGTGGGATATG
TTGCGTGAGTCAATTCAGCAGACATCNAAAGAGACAATCCCACCAACCCA
TAGAGTTGCAAAAAAGAAATGGATGTCAACCGAAATTCTGCAGTTGATGG
ATGAAAGAAGGAAGAAAAAGAATGATAAAGAAGAATACTCTAGAATACAA
AAAGAAATAGTGAACAAATGCAAAGTGGCTAAAGAAGCCTGGCTGAATCA
AATGTGTACAGAGATTGGGGAAAACCACGGGAAAGACTCACATTCCATGT
ACCAACAGATAAATATGTTAACAGGAAAGATGACACGTAACAGCACTGGA
TGTTTGAAATCAAAAGATGGTGACTTATTAATGGGACATAGTAATATAAT
TAACAGATGGACAGAGTATATAGGGGAATTGTATGATGATAATAGACCAG
ACGTAGAACTGCAGACCAACAATGATGGTCCACCAATAATGACTGCAGAA
GTTGAGGATGCAATACATCATATGAAGAAAGGAAAAGCACCCGGGCCAGA
CAACATCTCACTGGAAGAAATCGAAGCACTGGGAGATTTTGGAATTGAAA
TAATAACTAAACTTTTAAATGATATTTATAATAGTGGGTATATTCCAAAT
GACCTTTTAAAATCCATATTTATAGCTCTGCCGAAGAAACCAGGCACTNT
AAAATGTGAAGACCATCGCACAATAAGTCTTATGAGTCACATGACTAAGA
TTTTACTGAGAATAATTATGAGAAGAATAAGAAACAAAATTAAACCAGAA
ATCAGCGATGAACAATGTGGATTTGTAGAAGGAAAAGGTACAAACAATGC
CATATACATCCTAAGGACATTGTCAGAAAGAGCTATAGAAGTAAAGACTG
ATTTGTACTTATGCTTCATAGACTATACAAAAGCATTTGACTGTGTGAAG
CATGAAGAAGTAATCAAACTGTTAGAAAAAATTAAACATTGATGGGAAAG
ATCTACGAATAATAAAGAATATGTATTGGCAGCAAACAGCAGCTATAAGA
ATTAACAACTGTTTAGGTACATTTCAAAGCATAAAGAGGGGCGTACGACA
AGGATGTGTACTGTCACCTGATTTGTTTTCAATATACAGTGAATATATAA
TGAGATCTTTAATTGATATGCCCGGAATTGTGGTTGGTGGGCACAATATA
AACAATTTACGTTATGCTGATGACACAGTCTTGATAGCAACAAGTCAGAA
AGAACTACAGGAAATGATAGACATTGTGGTGTTAGAAAGTGGAAGAATGG
GCCTCAGTTTGAATAATGGGAAGACAGAAGTAATGGTGGTATCAAAGAAA
CGAATTATTCCTAAATGTGTAATAAAAGTCGATGGTGTTATTTTAGGACA
AGTACAGAAATTTAAGTATCTGGGCACATGGATAACATCAGATGGAAGAT
GCATAACTGAGATAAGAAACAGAATAGGACAGGCAAAAACTGCATTTTAT
AAAATGAAAAACATCTTGTGCAATATATCCTTGTCATTGAGAGTTAGAAA
AAGAATTCTTGCTTGCTACATACATCCAGTTTTAACATATGGCTGTGAAT
CCTGGACAATCGGTAGGCAGGCCAAACAATTTCTNGAGGCCTCAGAGATG
TGGTTTTACAGAAGAATGCTTAGAATACCTTGGACAGCCAAAAAGAGCAA
CCAAGAGGTTTTGAAAGAGGCGGGAGCCCGAAGACAACTTATCACAGACA
TCAGAAGGAGACAGTCATCATTTTTCGGCCATGTTATGAGAAGAGGGAAA
ATAGAACATGTTGTGACCACTGGAAAGATCTGTGGAAGGAGGGATAGAGG
AAGACAACGAGAGAAGATGCTTGACAGTCTTGTTGCATGGCATGGAGGTG
TGTCGGCACACGAACTGATACATGCTGCAGGAGATCGCGGATTATGGAGA
GGCATGATCGCCCACGCCAGTCGGCAAGGCACCTGATGATGATGA
>rnd-1_family-277#LINE/RTE-BovB ( RepeatScout Family Size = 309, Final Multiple Alignment Size = 100, Localized to 1000 out of 1011 contigs )
TGGCAGGGCAGACCAGGCCCTTAGCCTTGGCTGGCAGCTGGTCTAGGAGG
GAAGCTCCGACAGGCGGACAGACAGAGCACTGCTCTTCTGATCCGGCAGC
TTCTGCAGCNTGCTTTGTTCCAAACGTACTGGTGTTACCTTTCCTTTGGA
GTAAACAAGGCAGGCCGAGNGAGGGATCATGNTGCATGGGCAACACATGG
TCTCTACAATACTGCCCAGGCTTTGTGCTATGG
>rnd-1_family-162#LINE/RTE-BovB ( RepeatScout Family Size = 683, Final Multiple Alignment Size = 100, Localized to 1000 out of 1011 contigs )
GACAAAGAATGAAATGGTTCGGCCATCTAGTGAGAATGCAGCCAGACCAA
ACTGCATATGAGACTTTTTACAGCAGAACATCTGGGAGGAAGGCGAGAGG
AAGACCAAGAAAGAGATGGATAAATGGTGTAGCTGAAACCTGCAAAAAGA
TGAACAAATCCATCACCCAAGCCACCCGAGAAGCGCAAGACAAATACAGA
AAACCACGACACTGGGCTACAACCTGGTATCAGTGAGACGACAAAAGAAG
A
>rnd-1_family-161#LINE/RTE-BovB ( RepeatScout Family Size = 688, Final Multiple Alignment Size = 100, Localized to 1000 out of 1011 contigs )
AAAGTTAAATGCATTCGAAAACAAATGCCTGAGGAAAATGATGAACATAA
AATGGGATGAATTCAAGAGGAGTGAAGAAATAAGAGAAATGTCTGGGCAA
CCACTAGTATCAACAGTTATAAGACAGAGAAGATGGCGCTATATTGGACA
CATCCTGAGAAGAAACGAGCAGAGAATCACCAAACAGGCACTGAAATGGG
AAATAAA
>rnd-1_family-118#Unknown ( RepeatScout Family Size = 998, Final Multiple Alignment Size = 100, Localized to 1000 out of 1011 contigs )
GCCCTTAACTGGGCGGCTGGCACGTTGTGTTGTGGTTTACGGCTAGGCTG
CGATATCTACGCCTTTTTCGGTTTTGGGGTTTACAGCTAGCCTGCGATAG
CGGCGACGTGATGCTCAATGGTCATGTCACGGGTAATCTTCGTTCGCCCT
TGAGAGGGCGGTTGGCACGTTGTGTTGTGGTTTACAGCTAGGCTGCGATA
TCTGACCTAAACTCTTCAGTCTTCGGTAGTATAGTTGT
>rnd-1_family-353#DNA/hAT-Charlie ( RepeatScout Family Size = 191, Final Multiple Alignment Size = 100, Localized to 1000 out of 1011 contigs )
CAGTGATTCCCAAACTGTGCGCCGCGGCGCCCCGGGGAGCCGCGACCTCT
TCACAGGGGCGCCGCGAAATATTCGAAGATACACGAGTTTTATTTAATTT
TTATCTCTTACACACGAATAGTCATACTTTTACTTAGGTTAGGGCGCCGT
GGAAAAATTTTAATTGAAAAAAGGCGCCGCGACTAAGAAAAGTTTGGGAA
ACACTGNTCTA
>rnd-1_family-380#Unknown ( RepeatScout Family Size = 159, Final Multiple Alignment Size = 100, Localized to 1000 out of 1011 contigs )
TTTAGGAGGTCAGGATATGAATATATTAACTAAAAATAGCATTTAGGGGG
TTTTCTTTGAGCCAAATGGCTTTTTTAAAGCCAAGTTGACGTCAAATTTT
CCCGTAAGCCTCAGTGATAGAGGTCATGG
>rnd-1_family-293#LINE/RTE-BovB ( RepeatScout Family Size = 280, Final Multiple Alignment Size = 100, Localized to 1000 out of 1011 contigs )
AATATACAAGAGCAACATTTTAGGAATACTATTATACAACAGTGAATGTT
GGAAAATGACAGCGGGAATTACACATAAACTNGAGACTTTTCAAAATAAA
TGTTTAAGGAGAATTCTGCGAATATTTTGGCCAAACAAGATCACAAATGA
AGAACTGAGGAGGAAAACAGAATGTNCATCACTGGCAAACGTTATCAAAG
GAAGANGATGGAGATGGCTTGGACATGTTTGCAGAATGCCTCGTGACACT
CTGGCAAGGACAGCTCTCCGGTGGACAGCAGATGGGAAAAGGAGACGTGG
ACGACCTAAGGAAACCTGGAGAAGGACAGTAGAAAGGGAAATGAAGGAAT
GTAAACTGACATGGGATACCATGGGCAGAAAAGCAGCAGACCGGCAGCAA
TGGAGATCACTTGTGAATGCCTTATGTGTCAACAGCGACATGAAGAGGAT
ATAGATA
>rnd-1_family-89#LINE/RTE-BovB ( RepeatScout Family Size = 1311, Final Multiple Alignment Size = 100, Localized to 1000 out of 1011 contigs )
ATTGTGGAACATACAGAGGCATCTCTCTNCTAAGCCACGTNGGAAAAATG
TNTGCCAAGATANTAGAACGAAGAATGAGANCGGTGGTAGAACCTCAGCT
GAGTAACAACCAGNTCGGATTTAGGAAAGGCAAGAGCTGCACTGATGCNA
TNTTCGCNCTNAGACAAGTTNGTGAAAAGACAATCGAATACGATAAACAN
CAGAACNTCGTNTTCGTAGATCAAGAGAAGGCATTCGACAGAGTNGACAG
AAATNTACTATGGAAAATTCTTGAAGACTACGGAGTACAGGGNCAATTAT
TAGACAGCGTCAGAGCCCTCTATAAAAAAAGTGAAAGCGCAGTNAGAACA
ACAGGNGGCATCNCAGACTGGTTCACAGTNACATCNGGAGTAAGACAAGG
ATGTGTNCTATCACCACTACTNTTCATNACATACATGGACAANATTGCAC
AGAAGCAAACCCAAACGCGGATGTTATAAACGAACTACTCTTTGCNGACG
ACCAANGCNTANTNCACGAAGATAGAACAAAANCTGCAACAACATCTGAC
CCACTACTCAACAACTGTACAAANATAATATGAGAATCAACACCGAAAAA
ACAGAAGTNATGANNATAGGNAGAAAACACAGCACCGTAAACATAAAGAT
CAAATGNCATACAATCAAACAAGCGCAAGAGTTCAAATACCTGGGAAGTA
TATTTACAGAGGATGGNAGANTNGACAGAGAGATAGAAGCNAGAGTNCAG
AAAGCAAACGCTGTCACNTACCAGCTAGCCCCACTGCTTAGACACCCAAA
GATCTCGTTACCAGCCAAACGACAAATGATNAACAGCATCTTCATCCCNA
CNTTATGTTATCAGTGCCAGACATGGACAATGAACAAGNCACATAGCAAA
AAATAACTACGTGTGAAATGCGATGTCTCNGAAGGTCACNAACAANACNA
GAAGAGACAGGGTCACGAACGCCAGCATTAGAGACAAAGTCGGAACAAGA
CCATGTCTGGAACATATTGAAAGACAGAGAATGAAATGGTTCGGCCATCT
AGTGAGAATGCAACCGGACCAGACTGCATACGAGGCCTTTTACAGTAGAA
CATCGGGAAGAAAGGCNAGAGGAAGACCAAGGAAAAGATGGATAGATGGN
GTAGCCGAAACCTGCCAAAAGATCCAGAAAACCGTCACTCAAGCCACNCG
AGAGGCGCAAGACAAATACNGAAAACCACGACACTGGGCTACAACCCGGT
ANCAGTGAAGANGACAAAAGATAGA
>rnd-1_family-460#Unknown ( RepeatScout Family Size = 100, Final Multiple Alignment Size = 100, Localized to 1000 out of 1011 contigs )
TGGGTATGCTTGGTGCATAGAATGGTATGGGTTGGTGGTTGTTGGTTGGA
CTGTGATTCGTCTGCCTGNCCTCCAAGGAGGTATCATCCTGTCAGGAAAG
AACTCAGAATTAGTAATCATCCAAGGGGGTATCATCCTGTCAGGAAAGAA
CTCAGAATTAGCAATCATCTTCAATCACACGTCAGCTCACTCCACCTCCG
CTCCCCTGTTTCATTCCTCAGAGTGCAGCTCTCAAGACCAGGAGACANTA
GTCTCCTATCATTTATCTGTCTGTTCAGTGCAAGAGATGGAAAGTCAGAT
ATACAGTGGAGATAGATAGACNCTATCACACATAGATCATCCTCTCTCCN
CCCTCACATCTGCACTGCAGACACACAATNTTTACCGTCAGTACCTATAT
ATNTTACGCCTCCACAGTCCGCCCACTACACACCCANTG
>rnd-1_family-150#Unknown ( RepeatScout Family Size = 782, Final Multiple Alignment Size = 100, Localized to 1000 out of 1011 contigs )
TCGGTCTCTCGCCAGCTCTCCCGCCTCATGTACTTTCATACTCAAGGAGT
CACTTATATCCTGTGCCCATCTTCGTGTCGGTCGGCCCCTGAGCTTGATA
TAGTGTTTGAAATTTTTTTTTAGGGCTTGGTGGTAGAGGGCAGCAAACTG
AAGTCCTGTCTGTTCTGGACCTGGTACCTGAAAGGGTTAGGGAGAGAGAG
AGAGGGAGAGAGAGAGAGTCATGCAGAGAGAGGAAGACACATGCTGAGGT
AGGCTGGGAGAGACAGTGTAAAGATGGACAGATGAAGGTAGAGGAAAGAA
GGAAAAGAAGNCTGGGGAAGGAGGAAAAAATGAGAGGGAGGGATGGAGAC
ATGATGAGGGAAAGTGGGGAAGGGACAGCGAAAGACAGAGAGGGAGACAA
ATACAGAAAGAGGGAATGCAGATACAGAGATGGGCAGATGAAAAGAGAAG
GAAGAAGGGAACGAAACAGAGATATGGAAGGAGGAAAATATGACAAAGAG
TTGAAAGAAGGGAGACAGAGGGAGAGAGAACGGACAGGGAGAGAAGCAGA
TGCAAGCAGAGAGAGATGTAGACATAAAGGAGAGAGAGACAAAGGGACAG
CACAGAGAGGCAAGCAGACAGAGGGAGAGAACCAAAGAAAGAGAAAAAAG
GCAGAGCAGGAGAATGGGAGGGAGGTATACAAAGAGGAAGTGATGAAGGG
AGGCAAACAGACATAAAGCAAGAGAGAGAGAGAGGTGGGTGAGGAAGGCA
GTGACAAACACAGATNAAGAGAGAGGGGCAGGAAGGGAGACAAGATACAT
CAAAGAAAAA
>rnd-1_family-296#LINE/RTE-BovB ( RepeatScout Family Size = 266, Final Multiple Alignment Size = 100, Localized to 1000 out of 1011 contigs )
TATGGAACTCTAAATTGTATAGTTTTAAAACCAAGTTACGTATTTTCAAT
TCTAATGTTATTTCAGTTTTAACATATGCCAGTGAAAGTTGGAGAACCAC
TAAAGACATGGAACGAAAGTTAAATGCATTCGAAAACAAATGCCTGAGGA
AAATGATGAACATAAAATGGGATGAATTCAAGA
>rnd-1_family-171#LINE/RTE-BovB ( RepeatScout Family Size = 644, Final Multiple Alignment Size = 100, Localized to 1000 out of 1011 contigs )
TTTGCTGCTGCTGTCTCCGCTTCTTGTGCTAGATCATTTAGATATTTCAC
TTTATCTGCCCTTATACGCCTCCTAACTTCCTTGTTGGCTTCTGTGTATT
TCTCCTGAGCTCTAGCTTTAGCAGCTCTAGTTTTGCTATTGTTTAAGTCT
GCCTTTTTACTTTTCCTATCTTCAATCAGTTTAATGGTTTCTGGTGTTAT
CCACGCTTTATGTTTCCTTTCTTTCTTGCCAAGAACTTCTACGCAAGATT
CATTCCAGATTCCTTTGATCTGATCCCAGCAGACTTCTGTGCTGACATCT
TCAGCTAACTGCTGCAACACCTGGTACTTATTAGAGACCGTAACTGAGAA
CTGTTCCTTAACTTCTTTATCCCTGAGANAGCCTACATTATATTGGTTTC
TATGATTATAAGATGTTATATATCTTTTTAGTTTCAACTTGATTTTACTT
ACCACCAGGAAATGGTCAGTAAATACATCGGCACCTCTGAAAGCCCTAAC
ATCGTAAAGGGATGATCTAAACTTTTTGTTAATACATATGTGGTCAATTT
GATTAGTTGTCTTATGGTCTGGTGATTCCCATGTTGCCTTGTGTATTCTT
TTATGGGGAAAAATACTTCCACCAATAACATACTGGTTNCCTGCACAAAA
ATTTGTGAACAATTCTCCATTTTCATTCATTACTCCTAGACCATGTCTTC
CCATAATTTCTTCATAACCTGTGTTGTCTGATCCTATCTTAGCATTCAGG
TCACCCATCAAAATTTTTAAGTTGCCCTTTCTTTCATTATTTATAATATT
TTGAAGCTGCATGTAAAATTCTTCCTTAACAGATGCATCTTTATCATTTG
TTGGTGCATAACACTGTATTACCGACATGTTCACCTTCTGTTTCACTGTT
CTAAANGACGCTCTTATTATTCTGGGACTCACAGCTTCCCATTCTATTAG
TGCCCTGTCTGCTTCTTTCGATAGCATCAGGGCCACTCCTTCACTGTGGG
GCGAATTTTCCTCTGTGTGTCCTGAGAACAAAATAGTTTCCCCTGAATTT
AGAATACTTTTCCCCGCCCCAGTCCATCTAGTTTCACATAACCCTAAAAT
ACTAATTCTATAATGTTTCATTTCCTTTGCTACTTCCATTGTTCTCCCTA
TATCATAGAGAGTTCTAACATTCCAGGTGCCAATTCTGGAGGTTTTCCTA
GCTGAGAGGAGGTACGTCGACGATCCGGACTCCTTNCGGCTTTCTCCACA
CCGTGTCATACTTCTTCTATTTGAAGAGCCTCCCCTCATCTTGGTTGGCT
GGGTTTTACTTGCTTCTCTTTTTGACTTATCCATGGTTGGTTGGTTTTTG
TGGCTATGGTTTTTACAGGATGAGGTAGCCAACCTCAAGCCCAACCCTAC
CCTTAGTCGCCTCTTACGACATGCCTGGTAGGGTGCAGTGTCACTATTCT
TTGCTTCCCGTGAGGGCCCCGGTGA
>rnd-1_family-198#Unknown ( RepeatScout Family Size = 508, Final Multiple Alignment Size = 100, Localized to 1000 out of 1011 contigs )
TGGCACAGGAGCGGAGCAACTATGGGGTGACCCGTTTGCTATGAAGCTGA
AACTAGGATTACC
>rnd-1_family-153#Unknown ( RepeatScout Family Size = 771, Final Multiple Alignment Size = 100, Localized to 1000 out of 1011 contigs )
AGGATATTCAGGTGTGCGAGGTAACGAGCAGGCTGATAGATTAGCTGCTG
CCGCTCCTCTGGGCGGTGAGCTACTTTATGATAAAGCGGACGTGGTGAAG
GCTCTCTGGGATCAAATGGACAGTGCAANAGAACAGACAGAGAATCCATA
CACTGAAAGACTAATTCAA
>rnd-1_family-190#LINE/RTE-BovB ( RepeatScout Family Size = 537, Final Multiple Alignment Size = 100, Localized to 1000 out of 1011 contigs )
TGATAACATCAGATGGAAGATGTATTAAAGAAGTTAAATGTAGAATAGCT
CAAGCAAAGGCAGCATTTTACAAAATGAAGAATATTTTATGCAATCTTTC
TTTGTCAATTGAGACGAGAAAGAGAATTCTTAAAAGCTATATAAATCCTA
T
>rnd-1_family-223#DNA/hAT-Charlie ( RepeatScout Family Size = 443, Final Multiple Alignment Size = 100, Localized to 1000 out of 1011 contigs )
CTAGAGCAGGGCTATTCAACTGGCGGCCCGCGGGCCAAATCTGGCCCGCG
GAGGCCTAGCAAGTGGCCCGCGGATCATTGCCAGTTGTATTGTATTAATG
ATCTTTCTATGCTGGGGCTCGGGCCTCTGGCCCGTGACGATCCCCATTTT
CAAAATTTTGGCCCCTGAGTAAACTTAGTTGAATAGCCCTG
>rnd-1_family-125#Unknown ( RepeatScout Family Size = 943, Final Multiple Alignment Size = 100, Localized to 1000 out of 1011 contigs )
TCTCTCTCTCTCTCTCTCTCTCTCTCTCTCTCTCTCTCTCTCTCACACAC
ACACACACACACACACACACACACACACACACTTTCAAGTTTCTTCATGC
CTTCTTTAACACAACAGTAGCTGTTGCCTAAATCTGTCGTAGCGGGGAAA
ACTGCGACCCGGTTGCGCGGTAACAGCGCCTG
>rnd-1_family-225#Unknown ( RepeatScout Family Size = 435, Final Multiple Alignment Size = 100, Localized to 1000 out of 1011 contigs )
TGAACTGCATTTCTAATGTCGGACTGTTTGTGTTAGCACTTCTGACGGCT
GCCNTATGCNTTTAATGCGTGTGTATGC
>rnd-1_family-275#LINE/RTE-BovB ( RepeatScout Family Size = 318, Final Multiple Alignment Size = 100, Localized to 1000 out of 1011 contigs )
AACCTGACATCCCACATTGTGCCAACGGCTTCGGGCGGAGGAGCGCATTG
GGGAGGATACTAGCCTTATCCTAGGAAGAGGAAATGCAACCTGAAAACTT
TATGTTATGGCAGGGCAGACCAGGCCCTTAGCCTTGGCTGGCAGCTGGTC
TAGGAGGGAAGCTCCGACAGGCGGACAGACAGAGCACTGCTCTTCTGATC
CGGCAGCTTCTGCAGCNTGCTTTGTTCCAAACGTACTGGTGTTACCTTTC
CTTTGGAGTAAACAAGGCAGGCCGAGAGAGGGATCATGATGCATGGGCAA
CACATGGTCTCTACAATACTGCCCAGGCTTTGTGCTATGGAGAGGA
>rnd-1_family-59#Unknown ( RepeatScout Family Size = 1943, Final Multiple Alignment Size = 100, Localized to 1000 out of 1011 contigs )
GTTGTACCCCACCAGGACATCACACAAGCGATAAACACCCGGTGACACAA
AGTGCCACCATGCGGATGAGGATCACCCGTGGAGAGGTCCCAGAAACCCC
TTTCAGCCGTTAGGCCATATCTATGGCTAGGCCATATTTATGGCCCGGCT
ATATTCAGGGCCCCCGGCAGAAGCCAGGGTGGGGCTTCAAA
>rnd-1_family-66#Unknown ( RepeatScout Family Size = 1797, Final Multiple Alignment Size = 100, Localized to 1000 out of 1011 contigs )
AGTTAGTTGCGTATCCTTTACAGGACGTTGCAGAACCAACCCCAGCATTT
TT
>rnd-1_family-421#LINE/RTE-BovB ( RepeatScout Family Size = 125, Final Multiple Alignment Size = 100, Localized to 1000 out of 1011 contigs )
TCTTATACGGATGTGAGAGTTGGACTCTCACTGTGGAAATGGAAAGGAGG
ATTCAGGCTTTCGAATGTAAATGCTACAGACGCATTTTACGAATTAGTTA
TTTAGAACACAAAACTAATAAATATGTCAGAGACAAAATATACAAATTTG
CAGGACATCAGGAGCCTCTCTTGGCAGTGGTGAAACGTCGCAAGCTAGCT
TGGTTCGGGCACGTGGTGAGACATGATTCGATTGCAAAGACTGTACTTCA
A
>rnd-1_family-412#Unknown ( RepeatScout Family Size = 131, Final Multiple Alignment Size = 100, Localized to 1000 out of 1011 contigs )
GGTTCATTTTACGTTTTCCGGCCCAGAAAGAGAGTGACTTCCCTTGCCAT
TCATGCCTCGTCGNGTCGCAGGGCCTGTCCTATGTTGCGGGGGTGTCATG
CTT
>rnd-1_family-195#Unknown ( RepeatScout Family Size = 516, Final Multiple Alignment Size = 100, Localized to 1000 out of 1011 contigs )
GGGCTATCCTCCGAATAACGGTCCCAAATTATCGAGGCCGAAAATATACC
CTAACAGGGCCTCAGTCACGTGTCAATTGCGCACTTCCGGCGACTTAAAT
TGCGCACTTCCGGCGACTTCCGCCACCGCCGAGAGTATCCCCCACGCCG
>rnd-1_family-74#LINE/RTE-BovB ( RepeatScout Family Size = 1541, Final Multiple Alignment Size = 100, Localized to 1000 out of 1011 contigs )
TTAAAAATTTTGATGGGTGACCTGAATGCTAAGATAGGATCAGACAACAC
AGGTTATGAAGAAATTATGGGGAGACATGGTCTAGGAGTAATGAATGAAA
ATGGAGAATTGTTCACAAATTTTTGTGCAGGNAACCAGTATGTTATTGGT
GGAAGTATTTTTCCCCATAAAAGAATACACAAGGCAACATGGGAATCACC
AGACCATAAGACAACTAATCAAATTGACCACNTATGTATTAACAAAAAGT
TTAGATCATCCCTTTACGATGTTAGGGCTTTCAGAGGTGCCGATGTATTT
ACTGACCATTTCCTGGTGGTAAGTAAAATCAAGTTGAAACTAAAAAGATA
TATAACATCTTATAATCATAGAAACCAATATAATGTAGGCTTTCTCAGGG
ATAAAGAAGTTAAGGAACAGTTCTCAGTTACGGTCTCTAATAAGTACCAG
GTGTTGCAGCAGTTAGCTGAAGATGTCAGCACAGAAGTCTGCTGGGATCA
GATCAAAGGAATCTGGAATGAATCTTGCGTAGAAGTTCTTGGCAAGAAAG
AAAGGAAACATAAAGCGTGGATAACACCAGAAACCATTAAACTGATTGAA
GATAGGAAAAGTAAAAAGGCAGACTTAAACAATAGCAAAACTAGAGCTGC
TAAAGCTAGAGCTCAGGAGAAATACACAGAAGCCAACAAGGAAGTTAGGA
GGCGTATAAGGGCAGATAAAGTGAAATATCTAAATGATCTAGCACAAGAA
GCGGAGACAGCAGCAGCAAAAGGAAACCTCAGAGAACTTTACAGTAACAC
AAGAAAATTAGTAGGTAAATATAGTCAGCCAACTGGATCAATCAAAAATA
GTCAAGGAAAGGTACTTACTAACACTAAAGATCAAATGGACAGATGGGTT
GAATATTTTGAAATGCTTCTAAATAGACCAGGCCCAGAGGTTCCCCCAGA
TATCCAGCCTTTAGAAATGGAACTGGATATCAACTGTGAGATACCATCCA
AAGAGGAAATTAGAAAAGCTATCAATCTTCTCAAGGAAGGAAAGGCGGCA
GGCCCAGATGGTATCCCAGCTGAAGCCATCAGGGCCAACATAAACACATC
AACAGAATTGCTACATAGATTATTCAGTAAAGTCTGGGAGACCGAAGAAA
TACCAGCAGACTGGAGAGAAGGATATCTTGTGAAACTGCCCAAAAAAGGT
GATCTACAGGAGTGTGAAAACTATAGAGGAATTATGTTGCTGTCAGTTCC
TGGAAAAATATTAAGTAGAATTATTTTGGAAAGATTAAAAGATGCTATTG
ATAAAANGCTAAGAGATGAGCAGGCAGGTTTTCGGTCAAACAGATCCTGT
ACTGACCAGATAGCCACATTACGTATTATAATAGAGCAAAGCATTGAACT
GAACTCACCACTTTACATTGGATTTATAGACTATGAAAAAGCATTTGACA
GCATTGATAGGGAATCTCTCTGGAAATTGATGGGGCACTATGGAATCCCA
CAGAAAATTATCAACTTAGTAAAGGCAACATATAAAGACATGAAATGTCG
AGTTCTTCATGAGGGAAAGCTAACAGATGCATTTGAAATAAAAACAGGTG
TGCGACAGGGATGTCTTTTGTCGCCTCTCTTATTTTTACTGGCTATAGAC
TGGACTATGAAAACAGTAACTGCTAACACCAAGAATGGAATTCAGTGGAC
CCCTACAAAACAGCTTGATGATCTGGACTTCGCTGATGATATTTCTCTTC
TGTCCCATTCACGGAATCAGATGCAAGATAAATTAAATATACTTGATGCG
AGATCACAGCAGCTTGGTCTGAAAATCCATAAAGGAAAGACAAAGATAAT
GAGAATAAATCAGGCAAATAGTAATGTGGTTTCTCTTAATGGCACCCCAC
TCCAAGACGTGGAGTCGTACACCTATTTGGGCAGTAATGTAGATAAAGAT
GGAGGAACTGATAGAGATATTAAAATAAGAATACAAAAGGCAAGAGGGGG
CTTTCATAGCACTAGGGAATTTGTGGAGGTCAAAAGAAATTAAAAGAAAT
ACTAAACTAAAAATTTTTAATTCTAATGTCAAATCAGTACTNTTGTATGG
GGCGGAAACATGGAGAACAACTAAGGCAATTACTAATAAATTACAGACAT
TCATTAACTGGTGCCTGCGCAGAATAGAGGGAATTAAATGGTATGATAGA
ATAACTAATGTAGAGCTTTGGGAGAGAACTAAACAGGCTCCAGTGGACCA
AGAGGTGAGGAAAAGACGCTGGCGTTGGATAGGACACACACTGAGAAAAC
AGGAGAACAGCATAACTAGAATGTCTTTGCATTGGAACCCACAGGGGCAT
AGGAATAAAGGAAGGCCAAAAAACACATGGAGAAGAGAGCTGGAGAATGA
AGTTAGAAAGATGGGGAGGACATGGGGAGAGCTCCATGCAATGGCGAAGG
ATAGAACGACTTGGCGTGAGTTGGTTGAGGGCCTATGCTCCATTGGGGGA
TAGAAAGGCAGAAGA
>rnd-1_family-102#Unknown ( RepeatScout Family Size = 1156, Final Multiple Alignment Size = 100, Localized to 1000 out of 1011 contigs )
TAATTAGTCGACTCTTACGACATGCTTTTGGGGAGGCAGTGGGTCTATTC
TT
>rnd-1_family-88#Unknown ( RepeatScout Family Size = 1319, Final Multiple Alignment Size = 100, Localized to 1000 out of 1011 contigs )
TAATTAGGGGTTTGCTGAAATCGGATGTGTTGGGCCGAAAGGCGCAGATA
TCGCAGCCTAGCTGTAAACCACAACACAA
>rnd-1_family-82#LINE/RTE-BovB ( RepeatScout Family Size = 1393, Final Multiple Alignment Size = 100, Localized to 1000 out of 1011 contigs )
AGAAGAAAAACATCGACATCCTACACGANCTGAACATCGAGGAGAACTGG
CTCATAAACAGCATCCTGTCCCGAAAGCTGAGGTATTTTGGCCACGTCAA
GCGTCATGGTGGCCTGGAGAGAACGGTGATGGAGGGTGCAGTTTCCGGAA
AGCGAGGCAGAGGCCGACCTCCGCGAAGGTGGATACAGGACATTGAAGAT
GCATTGGCTNTGAAAGCACACGGGGCTGGAGAGCTGGCTAGAGAAAGGGA

>rnd-1_family-42#LINE/RTE-BovB ( RepeatScout Family Size = 2524, Final Multiple Alignment Size = 100, Localized to 1000 out of 1011 contigs )
CAGGCACTTTAAAATGTGAAGACCATCGCACAATAAGTCTTATGAGTCAC
ATGACTAAGATTTTACTGAGAATAATTATGAGAAGAATAAGAAACAAAAT
TAAACCAGAAATCAGCGATGAACAATGTGGATTTGTAGAAGGAAAAGGTA
CAAACAATGCCATATACATCCTAAGGACATTGTCAGAAAGAGCTATAGAA
GTAAAGACTGATTTGTACTTATGCTTCATAGACTATACAAAAGCATTTGA
CTGTGTGAAGCATGAAGAAGTAATCAAACTGTTAGAAAAATTAAACATTG
ATGGGAAAGATCTACGAATAATAAAGAATATGTATTGGCAGCAAACAGCA
GCTATAAGAATTAACAACTGTTTAGGTACATTTCAAAGCATAAAGAGGGG
CGTACGACAAGGATGTGTACTGTCACCTGATTTGTTTTCAATATACAGTG
AATATATAATGAGATCTTTAATTGATATGCCCGGAATTGTGGTTGGTGGG
CACAATATAAACAATTTACGTTATGCTGATGACACAGTCTTGATAGCAAC
AAGTCAGAAAGAACTACAGGAAATGATAGACATTGTGGTGTTAGAAAGTG
GAAGAATGGGCCTCAGTTTGAATAATGGGAAGACAGAAGTAATGGTGGTA
TCAAAGAAACGAATTATTCCTAAATGTGTAATAAAAGTCGATGGTGTTAT
TTTAGGACAAGTACAGAAATTTAAGTATCTGGGCACATGGATAACATCAG
ATGGAAGATGCATAACTGAGATAAGAAACAGAATAGGACAGGCAAAAACT
GCATTTTATAAAATGAAAAACATCTTGTGCAATATATCCTTGTCATTGAG
AGTTAGAAAAAGAATTCTTGCTTGCTACATACATCCAGTTTTAACATATG
GCTGTGAATCCTGGACAATCGGTAGGCAGGCCAAACAATTTCTNGAGGCC
TCAGAGATGTGGTTTTACAGAAGAATGCTTAGAATACCTTGGACAGCCAA
AAAGAGCAACCAAGAGGTTTTGAAAGAGGCGGGAGCCCGAAGACAACTTA
TCACAGACATCAGAAGGAGACAGTCATCATTTTTCGGCCATGTTATGAGA
AGAGGGAAAATAGAACATGTTGTGACCACTGGAAAGATCTGTGGAAGGAG
GGATAGAGGAAGACAACGAGAGAAGATGCTTGACAGTCTTGTTGCATGGC
ATGGAGGTGTGTCGGCACACGAACTGATACATGCTGCAGGAGATCGCGGA
TTATGGAGAGGCATGATCGCCCACGCCAGTCGGCAAGGCACCTGATGATG
ATGA
>rnd-1_family-396#Unknown ( RepeatScout Family Size = 146, Final Multiple Alignment Size = 100, Localized to 1000 out of 1011 contigs )
GCCCTCAGGTGTCACCCCCTCTGCCTAAGCCCTCAGGTGTCACCACCTCT
G
>rnd-1_family-90#LINE/RTE-BovB ( RepeatScout Family Size = 1296, Final Multiple Alignment Size = 100, Localized to 1000 out of 1011 contigs )
ACTAGGGCTGTACCGAATATTCGCTTCGTATTCGCTTCGGGGCCGAATAG
TGGACCTATTGACTATTCGGTATTCGGCCGAATAGTTGCGGTCGGGCCGA
ATACGAATAGTAGTTACCTTACACCCGCTTCTGCATACACGGCCTTAATG
CTGACAACATGGAACGATTGGTTTTGTTGAAAGCTAATGCAGCTTTCNTG
CATTAACTAAGCTGTCAGTGACAATTTCCAAGTTTAGTTACTTGTTATAA
TACTTAGGATTCTTTCATTCCTAGTTATTAGTTACCACAGACTGACTGAA
GGATGCAAAACATAAAATGTTTTTAAATGTTTACTATTCTGTACGAATAC
TAACTAGACATGGAAAGAATATAAACTCCGGCCACATCCAAGTCGATAAT
ATGAAAATCAAACGAACGGAAACATATAAGTACTTGGGTGCAAACTTCAA
CTGCTCCAACATGCTGAGAGAAGAAATACAATCTAGAATACAATCTAGAA
ATAAAGTATACTATGCCCTTCAACATCTGCTAAAGTCAAAGTGTCTGTCT
CGCAACACCAAGATCAAAATATATAAAACGTTGATAAGACCAGTCGTTTT
ATATGGCTCTGAAACTTGAAGCAGAAATAAAAGAGATGAGGCCTTATTAC
AGGTTTTCGAAAACAGTCTTACGACGAATCTTTGGACCCATCAAAGATGC
NAACAGCGGGGAATGGAGAGTGAGAAGCAACAACGTAACACATAATCTGT
TTAAATCACCATTGATCACTGGCATCATGAGAGCTAACAGACTAAAATGG
TTGGGGCATATTGAAAGAATGTCAGATGACAGAGAAGTAAAAACTGTATA
CACCTGAGAGAGGAATGGGCGTAGACCACGAGGCAGACAAAAAAGAAGNT
CGAGAGATAATGTCCAGCCAGACCTGCAAACAACTGGTGTCACAAATTGT
GAAGAGAAGGCCAGCCAGAGAGATGAATGGAGACGAGTGATATCTGCAGC
AGTAAACCTCAAGGGCTCGGAATGCTAAAGAAGAAGATGACTATTCTGTG
CTACTTTATGTGAAGTAAAAGTTCAGCGTACATTTGACATTATGAATGTG
GTGTTTTTTTT
>rnd-1_family-217#Unknown ( RepeatScout Family Size = 461, Final Multiple Alignment Size = 100, Localized to 1000 out of 1011 contigs )
TTCTTCTTCTTCTGCGTTCATCCGAAGATGTAATTGCGTTGTGCCCGTTT
ACAGCATGGCTGCGATATTTGCGCCTTTCGGCCGACACATCCGACTTCTG
CGGGCATTTGTTGAC
>rnd-1_family-327#Unknown ( RepeatScout Family Size = 221, Final Multiple Alignment Size = 100, Localized to 1000 out of 1011 contigs )
GGAGTTCCCGGGAAAGTCCAATATTATAGGGGTGTTACGGTTTGAAATGA
ACACCGACTAACCCTAACTTGGTAAATTGCACTGAACTGTTGTNAAGCTG
TAGTGAGCTTTGGTCAGTTGCAGTGAGCTTTGGTCAGTTACAGTGAACTG
TTTGTCAGTTGCAGTGAGCGTTTGGTAAATTTGCACTGAACTGTTGTCCA
GCTGCAGTGAGCGNTTGGTCANTTGCACTGAACTGTTGTTCAGTTGCAGT
GAGCTGTTCTTCAGTTGCAGTGAGCTGTTTTTCAATTGCTGTTGGCTGTT
GGTCAGTTGCAGCGAACTGTTGCTCAGTCGCACTGAACTGTNGCTCAG
>rnd-1_family-332#Unknown ( RepeatScout Family Size = 211, Final Multiple Alignment Size = 100, Localized to 1000 out of 1011 contigs )
CCGGCGATNNCGCGTGTTCTATATTACACGAATGTGAGCGCTTTTAACGA
CCCCAGAACATCTAGAACTGGCCCTAAC
>rnd-1_family-448#Unknown ( RepeatScout Family Size = 108, Final Multiple Alignment Size = 100, Localized to 1000 out of 1011 contigs )
TCTCTAGAACGCAGCGCATTCAGTATGTCTGCCCTGTCCATACTTCTTCC
TCCACCAACCACTGCAGACACGGCCAGTCTGT
>rnd-1_family-255#LINE/I ( RepeatScout Family Size = 364, Final Multiple Alignment Size = 100, Localized to 1000 out of 1011 contigs )
AGCTAAACAGACTCGCAGAAAACAATCAAATCGTTCTCCAGTGGATCCCG
GCTCACTGCGGCATACCAGGAAATGAGTTAGCAGACAGACTTGCAAAAAA
TGGAACAAAGGAGAAACAACACACCCATTCATTGTCATTACCAGAAATCA
GAACACTTATCAAGGGAAAATACAAGGAATTGTGGAGAGAACAAACCAAC
AGTAAACATCCACAAGACCCCATCAGCAGACTCAACAGAAAGCAACATAC
AACAATTTTCCGTCTACGAACAGGACACTGCAGGCTCAACTACCACATGC
ATAAAATAAAGACTGTACAGTCCCCACAGTGTGCCTGTCAGACAGGACCA
CAAACACCTGAGCACATTCTGCAGACCTGCCCACTCTACCTACAACTTCG
AAAAGACACCTGGCCTCAAGAGCAAAGTGTGCAGAGCAAGCTATGGGGAA
CCATGAAGGACCTGCNGCTGACATGCGAGTTCATAGAGGCAACCCACCTG
ATGGTCTGATCTGAGCATACGAAACCGAACGCAAAGAAGAAGAAGAAGA
>rnd-1_family-44#Unknown ( RepeatScout Family Size = 2483, Final Multiple Alignment Size = 100, Localized to 1000 out of 1011 contigs )
TCTGTGGCTTAGGCGTTGCGAACGCGCTTCGTAATGCCGGGGTGCCGGGT
TCGATCCCAGCTGCGGGCCTTGCGCCTTGCGTTGGTTTCGACAGTGGTAT
CGAGAAGCCGACCGTCCAGAAAGCAATGGCAAACTACTGGACGTAAATTT
GCCTAGAAAAACCACAA
>rnd-1_family-336#Unknown ( RepeatScout Family Size = 208, Final Multiple Alignment Size = 100, Localized to 1000 out of 1011 contigs )
AACGCAAGGCGGTCTGCTGCCAAATCGCCTGCAGCTGGGATCGAACCCGG
CA
>rnd-1_family-437#DNA/hAT-Tip100 ( RepeatScout Family Size = 116, Final Multiple Alignment Size = 100, Localized to 1000 out of 1011 contigs )
TTTAAAAGGCGTATATATTTTAAAGTTTTCTGAGATTAGCTGGTGTAATT
TAAAACGGTAGGGGCCTCAGGGCTTTATATAGCTTAGGGCCTCATCAAGT
CTAAATCCGGCCCTG
>rnd-1_family-347#Unknown ( RepeatScout Family Size = 194, Final Multiple Alignment Size = 100, Localized to 1000 out of 1011 contigs )
AGAAATCTAACGTGCGAAGAAAAAAGAATGTACCTATCTGTGTGGTCACA
AAAGTCCAAAACCCGCGGGCTGCTCCCCGCTGACTTCCGGAGGGCGCAGC
CCCTGTCGAGCGGGAGGCCCGATACGGTTGTGAGGTTAAGCAGGCATGTG
CAGGACGTGACGATTCCTTGGGTGAGCCCAGAACCAGAGCGCCATGTGCC
GGCTCTGCATNCATGGAAGCCTCCTTGGATGGCGGGGAATGCCCATGATC
TGCCCCTGCCTTCCCTTGAGGGCTAA
>rnd-1_family-136#LINE/RTE-BovB ( RepeatScout Family Size = 897, Final Multiple Alignment Size = 100, Localized to 1000 out of 1011 contigs )
CGACNGGCCTAGCAAGCCGGCAGTGGATTTTTTATCGCTACGAAAATTAG
AAAGGAGATAAATAAACGGACAGCCCCAAACGGAAAATGGACTGGAAACG
TTAAAGGACGACGAGACAGAAAAGCGACTTACATAGGCAACATGGAACAT
NTGTGGTATTGCCAACAAAGAGCCACAAATAGTGGATTATGATGAAAAAA
AAGAATATACAAGTCAATGGGNCTNGCGGATACAAGAAGGAAAGGAAATA
ATAANAAGAAAATACACGAAAACTACGTNCTANATATGGAGNAGGAGTAC
CCACAAGATACGAAGCATGGAGTNGGNTTTATNNTNCATCCNGANACAGC
NAAATANATANTAGGAACATAANTTATACTCAGAAAGAATTATAACTTTG
ATCAAGTTGACAGAAGGAAGAAAAGCTACAACGATTATTCAGATATATGC
ACCNTGCAACGATAGTTACACTGAAGAGGAGAAAGANGATTCTTTGACGA
NCGGCTTACGGACGCCATCAATAANGTTAANGAGAANGAGGACATCATAG
TAATGGGNGATTTTAACGGNAGGGTAGGATAACAGAAGANCACCATGGGA
GAGATACCTNGGCCCACATGCAGCCAACAACAGATTGCTAGAAATGGAAA
TGGCAAAGAACACCTGTTGGATTTGTGCAGCCGAGCACGATCTTTNTATT
ACCAACACATTCTNCCAACATCGCAGAGTCACGATTNANACNTGGTACAA
ATGGAACGATCTCAGATCAAGCGTCACAGATTGACTTTATACTNGCCAGA
GTCAACGGAAGAAGGAGAATTCTTAGACTCAAGAGCNATCCCAAATGCGG
GTCTATGTGACACAGACCATCGCCAGTAGTTGTGTTAACATAGCAAAACA
TCTCANATTAAAGAAACACAGAAAGAAATTAAACAAAAACAAGGATNTCA
TCAAGACTAGNAAATCTGAAACAGGAAGGAGTAAAAGANCAGTTNCAACA
GAAAGTAGAGACGGCATTCAAACAACTTCCACATGTAGTCGGCAATATTG
AGGAAGAATGGAGAAATATAAAAACACTATGCTTAGCATCGCAGAAGAAT
TATGTGGAAAACGGAAGAGTGGAAACAGACGGGGAAATAACAAATATTCA
CCTTGGTGGAACGAAGAAGTAAAAGAAGCAGTCAAANAGAAAAAAGACGT
ATAAACAGTGGNTAAAATCAAAANAAGAAGAGGATTATATNAANTACAGA
CTGCNAAGGAGAGAAACCAAGAGGANTGTCAAGAAANCNAAAGAAGNATC
CTGGGAACGTTTCGGTGAGTCACTAGCAGAANATGAGAAAACANCCAGCA
GAAAATTTTTCAAAGTAGTTAAAAANATGCGAANAAGAGATGAGAGCTAC
AACCCAACGAAATAATNAACGATAAGACAGGAAGGCCATTGATAGATCCA
CCCGAGATCGNAGAAAGATGGAGGGAATACTTCAATGAGCTCTTNAACCC
TCTAGGAGANCATCAGGAAAGAACAACTGAAGAGCACAGAGCAACAGCGT
TAGAACCACACATACTAACGGATGAAGTAGAAAAAGTCATCAAACAGTCC
CAAANATAAAGCACCAGGNGCTGATGGATTACCAACAGAAGTAATCCAAG
CNGCAGGNGAAANCGGCGTCANATGGCTNCACAGAATATTCAATGCAGCA
TGGGTANAACGAACGGCCCCNATTGATTGGCAACATGCAATAGTTATACC
ATTGTGGAAGAANAAAGGAAGCAAGCGAGAATGCGGTCAATACAGAGGCA
TCTCTCTTCTAAGCCACGTNGGNAAAATGTATGCCAAGATANTAGAAACA
AGACTGAGACCAGTGATAGAACCACAGCTGGCAGAAGAACAGNTNGGATT
TAGGAGAGGNAGAAGCTGCACAGATGCAATNTTCGCACTNAGACAGTTAG
TAGAAAAGAACATCGAATACAATAAGAACTTATTTGTGGCNTTCGTAGAC
CAGGAGAAGGCATTCGACAGAGTCGACAGACAATTACTATGGAAAATTAT
GGCAAGATACGGAGTAAGCGAACACCTCATCGGAGTGTGCAAAAGTTTAT
ACAGGGATTGTGAAAGCGCAGTNAGAACAAATCAGGGAACATCTCATNCT
GTTCACAGTNACATCTGGAGTAAGACAGGGGTGTGTNCTATCACCACTGC
TNTTCATCACATACATGGACAGNATATGCAAGAATGCCAAGCCCATGAAT
GAAGATCTTAGTAAGATCAACGAATTACTCTTTGCNGACGACCAGTGCNT
ATGATAGCAGAACGGCCATGAAATTGCAAGAACATCTAACACCCATNAAC
GACGGNTGTAAAACAAATAATATGAGAATCAACACTGAAAAGACAGAAGT
NATGANNATAGGAAAANAGAAGACAGATCTAAACATAAAGATNGNANACG
ACGGCNTNAAACAAGCGNAAGAGTTTAAATACCTGGGAAGTATATTTACC
GAAGATGGNAGAATGGACAGAGAGATGAAACAAGAATGCAGAAAGCAAAC
CAAGTGTCGCATACCAGCTAGCCCCCTCTTACAACATCCGGCNATCCCAA
TGAGCACAAAGAGACAANTTATTCAAAGCATCTTTATTCCAACACTNTGC
TACCAGTGCCAGACATGGACACTNACAACAAACCACGAAAGAAAANTAGT
AACCACGTGAAATGAGATGTCTGAGAAGGGCTGCGGAATAAGACCAGAAG
AGATAGGATNAGGAACGAGATCATTAGAGAACAAGTCGGAACNANACCAA
TTCTAGATTACATAGAAAAACAGAGAATGAAATGGTTTGGCCACCTAACG
AGAATGCGTGACACCATACCATACAAAGCATACATGGAAAGAGAAGAAGG
ACGTAGAGCAAGAGGAAGACCAAGGAAAAGATGGATTGACGGGGTCNCNG
AAACTCTGCCAAAAGCACGGCCTCAGAACGTCAGATGCTGCCCGCCTTGC
TTACGACAGGAACTTGCATCTCCCCACGACGCTTAGCGGCATACGTGGAA
GGAAAAAG
>rnd-1_family-257#Unknown ( RepeatScout Family Size = 359, Final Multiple Alignment Size = 100, Localized to 1000 out of 1011 contigs )
GGTAGGTAGGTGCTTTGCTGGGAAAAAAATCGTCACGTTCAACCAGCATC
CCCGAAGGGGGAGCTTTAGGTTATAATTGTGACTAGGTTATGTGCGCCAT
ATAAAATGGCTTAGCATTGCACGCCACCAAGAGCCCTGAAAAGGACTCCT
GCAGTGTTGATGCGATCAAAGGAGACAGACCCAAATACTGTCCCGACCGG
CGACGAAGTCGTCTACCGGCGAGCCA
>rnd-1_family-149#LINE/RTE-BovB ( RepeatScout Family Size = 786, Final Multiple Alignment Size = 100, Localized to 1000 out of 1011 contigs )
ATGTGTGCTGTCACCGTATTTGTTCAACCTGTACGCCGAAAATATAATGA
GAAATGTAAGAGATGATATAAACAAGGAACAATATGATGCCCTAAACATC
GGTGGTCATGAAATACCAGAAATTCGTTATGCTGATGATACAGTATTACT
ATCAACATCACAAAATGGTTTAGAAAACTTATTAACCTCACTCCAAAGAA
ATAGTGAAAATCATAACTTATTTCTTAACATAGCAAAAACAAAGATAATG
CATACAAACAAAACTGCCATGGAGAAGGAAATATATGTTAATGAGGAAAG
ATTGGAAGTGGTGGAAAATTTCGAATATCTTGGGTCACTGGTTACCAACA
ATGGTGACACAATGAAAGAAATTAAACGGCGACTATCAATTGCTCTTCAA
AGACTAAAACAACTGAATAAATTATGGAATTGTACAGATAGAATTACAAA
GGTCAGATTTTTAAGAGCATGCATCTTTCCCATTGCAACATACGCCTGTG
AGACCTGGACACTTACTAAACAAGCGGAACAGCGCATAAATGCATTTGAA
TATAAATGTTACAGACAGGTTCTAAGAATATCTTGGGTAAAGAAAAGAAC
AAATGCATCCATACTTCAAGAGCTGAATATTGAAGAGGGTTGGCTAGTAA
AGACAATAAAACAAAGAAAATTGAAATATTTTGGTCACTTGAAACGTCAT
GGAAGTCTAGAGAGAACAATAATGGAGGGGTATATGCCTGGGAAGAGAGG
AAGAGGAAGGCCAAGGAGAAGATGGGTGCAGGATGTGGCAGATGATCTCC
AGATGGGTGTATCAGACGCAGGACATCTTGCTCANGATAGGAAGGTTTTC
CGGAGGGTTGTTATGGCAGCGAGGTTCCGCGAGGGACATGCTACTGAATG
AATGAATGAA
>rnd-1_family-78#LINE/I ( RepeatScout Family Size = 1519, Final Multiple Alignment Size = 100, Localized to 1000 out of 1011 contigs )
TCACAGAGCATGTTGAGAAAGGTGGAGACAGGCATGCTCCGTGCAGAGTG
GCAAGCATCACTTCAGAGGTCCCGGGTAGTTAGCATCCTTTGGATATTTT
CTCCAGGTCATGCCGGTGTGTTGGGAAATGAGCAGGCAGATAGACTGGCC
GGTTCTGCACCACTTGGTGGTGAACTGATGTATGACAAGCTAGATGTT
>rnd-1_family-308#Unknown ( RepeatScout Family Size = 252, Final Multiple Alignment Size = 100, Localized to 1000 out of 1011 contigs )
TAGGGCCAGTTCTNCATGTTTTTGGAGCGTTAAAAGCGCTGGCGTGCTGA
AATATACAACACGCGATATCAACGGCCGACAACAACNAGTAAAATACTAC
GTGTTGCTGGCCGGTCACTAAGCGTGACACCCCCGCAACATA
>rnd-1_family-429#LTR/Ngaro ( RepeatScout Family Size = 122, Final Multiple Alignment Size = 100, Localized to 1000 out of 1011 contigs )
TGTCGTGGAGTGANCAGCCAACCCTACACANTGGACGAGTCGTGACGCTT
GACNTCCCTAGCGGGCACGTCANATTTCAAACTTGGACCCGTCCGGAAGG
GTATATAGTCCCTTATATCGATATATACCTTTATCTGGCGAAATAATCAT
TTCTACACCCTCTAGTTGCTTTGACNAATCTNCATTTTCAAACTTGCAAC
TGTGGGATAAATATTTCTGGAGTTTAATTCGGAAATTCCTGGAAACCGGT
TTACTCCTTGCGCATGNATACAGGGACTTCTTTCCTAGCGACGCCAAGCG
TAGTTTTGAGCGGCATTCTTTCGCCNGATCTCCGAAGCGTCCAGACGTGT
TCAATCTATGCCTGAAATTGGCGCATTCAAAGTACCNGTTNTATCTTTGA
AGGATTCCTAAGCTTGGGTAAGTTGATTATAGTTTACGAGTACCATAANA
TGATGTCTNTTTAAAGTTGGCCACTGCTGCAGAGAGGNCAGNNTCGGCTG
TGTGATCGCACAGAGTTCGACCGTTCTTGATGTCCAGAGANNCGGATCCG
AACNTAGACCTTCCCCTGTACAGACTAAATAGCTTGTGCCCTACATAACC
CACACCATTTGTAAANATATTAAACCCTACAAGTAATTATTCTCTAACCA
GACAAACGGAGTTTGTGCCGACTAGCGGANATANGGAATCTGGGTCATCC
TTCAGCGGCTAGGCGCTGTGACGTCAGAGCTAGGCGCTCTGAGTCAAAGG
T
>rnd-1_family-384#DNA/TcMar-Mariner ( RepeatScout Family Size = 156, Final Multiple Alignment Size = 100, Localized to 1000 out of 1011 contigs )
TTTTAATCAGTGAAGGGGTGAAACCTATAGAAATTCATCGGCGAATGAAG
GTCCAGTATGGTGATGCATGCCTGTCAGTCCAGCAAGTGTATGAGTGGAG
TAGGAAGTTTCAAAACGGCGTGACTTCTGTGACAGACTGTTCACGAC
>rnd-1_family-397#Unknown ( RepeatScout Family Size = 146, Final Multiple Alignment Size = 100, Localized to 1000 out of 1011 contigs )
AACATATGTATCGGGTGACTCATGCCGTGACCCCGTGACCTCTATCACTG
AGGCTTACGGGAAAATTTGACGTCAACTTGGCTTTAAAAAA
>rnd-1_family-119#Unknown ( RepeatScout Family Size = 980, Final Multiple Alignment Size = 100, Localized to 1000 out of 1011 contigs )
GGGAGCCGCCGTGGTGTAGCGGCTAGACGCTCGCCTGCGGATCGGAAGGT
CGTGGG
>rnd-1_family-359#Simple_repeat ( RepeatScout Family Size = 180, Final Multiple Alignment Size = 100, Localized to 1000 out of 1011 contigs )
TCCCCCGACACTTCGCTGAGGTACAAGGTGGAAGAGAAGAAGAAGAAGAA
GAAGA
>rnd-1_family-379#Unknown ( RepeatScout Family Size = 161, Final Multiple Alignment Size = 100, Localized to 1000 out of 1011 contigs )
AGTGAAATTCTCGAGAGAACAGGTGTTTGGCAATTAGGAATGTTTNATCT
TGGTCAAGGTCGTACTGTAGGCCGTTCACTGTGAGTGACAGGCCACTTGT
TAGCTAANTTGATCTGATAGGTACCTCAGAGGCGNGGCTTAAGTCATCNT
CTTGAGGGTTGGGTAGAACCNAGTAAAGGGAGGAGTTTAATTTGGACAAT
AGATTGATACTTATACTTCGAGCCTGTGGAATTCCCGTCATTAATCGCAG
CCTGCCGGCAAACAAACACAGGTCGACGTAAAGGTAATTTTACGGTCGGA
TTCTGGTTTGGCGATTGCTGGAAAGTTCCCAGGTGAGAGAATATTAATTT
TAATCTTGTATACATAGGTTAGGGAGTTAAGCTTAGTCTATNCTACCTTT
TCCTAATTTGTCTGCACATTCTGCTTGAAATAGTTCTTTGTGAGTATTCA
GTATCTCAGTTAGGGAACTGCTAAACTATTCCTATTTCTTGTATGTTTGT
GTCACATGTTTTTCAGTGTATGTTTTCATGTGTATAAAATAAGACGTGAA
CAATGACATTTGCTATAATGAAATGTAATTATATTGTTTCCACGATCAAC
CAAAACATGAGTTTGGACTGTGGGAAATGATGCCCAAATATGTGCAGGGA
TGCTGCTACGTTTTGTGTGCCCACCATGTGCTCACTTAATGTGTTCACCT
AAACAGGGGATTTATAACCCCAGGGGAAGAATGATGGGTGTATAGNATTC
ACTGTCACTGAAAGATAATATTCAGGACAGCGTGCACGTATAAAATGTTT
GCGTGTTCAGCACATAACCTGCGCCACGTGTTCATGTCAAATCAATGTCA
GCCAGTTGTTGGAAGTCTGAGTGANGACGGACAACAGACTTAGAAAGTCG
ACTATCATGACAGAACGTGAGAGGGAAGGCAGGATATGTGACGTCNATGT
GAGACAAAAGACCTTCAGACTAGACTGGAGAGAATGTGGAATATGAGGAG
GAGTGATGGGATATATTTTATTATTATATGTTATATTAATTGATACATGT
ATTCTTAGTGTAAGTCAAGATACTACACGTATGCGTTTGTTTCCATGATT
ACAGCGCCCATGTGACGATCAGTCCATGAAAGAGACTACATTGTGTTAGA
CTCGGCCAGCTGGGAACGAGGTGGAGAACGAGGTGGAGAACGAGGTGGAG
AACGAGGTGGGAACGAAGCGGAGAANAAGCTGGAACAGGCAGAAACAGGC
AAGGAAGAGTGGACGAGCTCGACAGTTCCTCACGGCTGTCAGAGGTTCTA
TAAGTTANGTTAACACGTTTTATGTTAACACTTATCATCATCATACCACT
CTAATCCCAGGNGCTCAGTTNTCTCGCTGAAGCNTATCACTATCATCAAC
CAGTCACTGTTTGTGTAAATCAACAAACTGGGAATTTCATTGTAGTAAAT
AAAGCTGTATGTCAAGTTTTATACTGCATCGTTTGTTAAATTCCAAGTGT
NTCCGTTCTTACATGTTTAATTAAACTGTTAAGATAGAATANCATTTGGT
GGGGGCTCAATTAATAATATAATAATTCTTTAATTATTCATAATAACACC
GGGAGAAGGTAGATGACGGAGGAATCACTTGCCCTGTCTAATAATTCATT
NAGTATAATA
>rnd-1_family-192#Unknown ( RepeatScout Family Size = 534, Final Multiple Alignment Size = 100, Localized to 1000 out of 1011 contigs )
AAATCCTCACCTGCACAGTCGTGGCGACAGCACTAGCCATGCGGCCGTAA
ATCCTCAGGCTCAAAGACCCCCCTGCCTACACCGCAAAAGTGGTATAATA
AAGGCAGTAATTGGCAGTTT
>rnd-1_family-241#LINE/I ( RepeatScout Family Size = 395, Final Multiple Alignment Size = 100, Localized to 1000 out of 1011 contigs )
TACACTTGATTCGCGACTAACTTGGAAGTCACACGTAGAAGCAGTACAGG
GGAAAGCATTCAAGAAGCTTGCAGTGATGAAAAAATTAGCGGGTACCACA
TGGGGCGCTAACTCCAGAATCCTAAAACAAGTATATACTGGAGCAGTCAG
GCCAGTCATGGAATATGCCTCCACTGCATGGGCTGCAGCAGCCAAGACAA
CAATGGGAAAACTGGACAAGGTTCAGAATATGGGATTAAGGATTGTTCTC
GGAGCCATGAAAACCACCCCCATCAGAGAGATAGAGAGGATAGCAGATAC
TGAACCACTCGAACTCAGAAGACAATACAAAACTCTTTTACAGTATGAGA
AATTAAAAAGACTTCAAAGTCACCCACTGCATTTTAAATTTCAAGAGAGA
ACAAAAAAACAGACTGAAGCGTCAGAGCCCCAACCACCTTGCTAGAGAAC
TGTACAGACAGCACCAAGATCTGCTTGAAAGAGATGTTGCACTGTGCGAA
AAACTTAGGCCAGAACCATGGACAAGCAAGCCAGAGAAGGCAAATGTAGT
CCTAAAGGTACCAGGGATCACTTCAAAAGATGCCCAGACGGAGACACAAC
AGAGAACCCTGGCTCTTGCTATGCTTGATGAGAAGTATCCAAACACCACT
TGGACTCAGGTTTTCACCGACGGCTCTGCTACAGATGCAGTCAGAAAGGG
GGGTTGTGGAATATACATTAAACCCCCTAGCAGTAGAGCAGAAACTCTCT
CTCTACCAGCAGGTGACATCTGCACTAACTTCAGAGCTGAGGCAACTGCC
CTCCTTTCTGCAGTCCAACATCTCATCACTCAAGAACACAGAGGGCACAA
AATTGTTATACTTAGTGACTCATTGTCTGTTCTCCAAGCACTATCAAGCA
AAAAACAAGACAAACTAATTGCAGATCTAAGGACCAACATTGGCTTACTC
TCCAAGGAAGCAGAACTGGTCTTGCAGTGGATACCAGCCCACTGTGGTAT
TCAAGGAAATGAGAGAGCAGATGAGTTGGCAAAAGCTGGGAGTAATCTTC
CACAACCTCATCCACCACACAGCTACAAGGAAACCAAAACAGCGCTAAAG
CAGTCTTTCAAGCGGGAGTGGAGAAGGCAGAATGGAGATTACAGACCAGA
GAGTGACAGCATAAACAAACTCAACAGGAAAGAACAAACATCAATTTTTA
GACTTCGGACTGGACACTGTGGTCTTCGAGCACACCTGTACAGGATAGGC
ATAAAAGAATCTGCTGCCTGTGATTGTGGAGCAGAAAGACAGACCCCTGA
GCACATACTGCAGTACTGCCCTNACCTCTCCCAGCAAAGACTGTGGATCT
GGCCCAAGGGAGCCACATTGCAAGAGAAGCTATGGGGGACCGGTGGCGAC
CTTAAACGCACAATCCTATTTGTGACCCAGACGGGACTCAATGTTTAGCA
TGACTGATGTCGAACGCAGAAGAAGAAGAAGAA
>rnd-1_family-427#Unknown ( RepeatScout Family Size = 123, Final Multiple Alignment Size = 100, Localized to 1000 out of 1011 contigs )
GTACTTTTTTTTAATTCACCCCAAACAAAGGAAATCCCGGAGTTCCCGGG
AAAGTCCAATATTCTAGGGGTGTTATGG
>rnd-1_family-258#LINE/RTE-BovB ( RepeatScout Family Size = 359, Final Multiple Alignment Size = 100, Localized to 1000 out of 1011 contigs )
ATAACAATAAATGATGAAGAAATTGAAAATGTCACAGACTTTGAATATCT
AGGCTCTNTAATAAACAACAATGGAGACTGCTCGACAGAAGTCAGAAGGA
GGATNGCNNTAGCAATGCAGAGATTAAACAGCATNAAGAGCCTATGGCNA
AGCACCAGCAAGNAGATNAAAGTNAAAATTTTGAGANCATGCATCTTCCC
TGTGGCAACATA
>rnd-1_family-67#SINE/tRNA-Deu ( RepeatScout Family Size = 1733, Final Multiple Alignment Size = 100, Localized to 1000 out of 1011 contigs )
CCGTGTGCATTGTTGCGCACGTAAAAAATCCCTTGGCAGTTGGAAATCGA
AAAGAGTAGCCTAACGGCGCTGCCCGGGCAAAATTTGGAGTTAAAAATCT
ACCCAAAGTATTTCAGGATCCTCGCCGGTGCTACAGAGCCTGTGCTGAGC
TTCTTCGGACTCAGACTTGAGTTAGAAGAAGAACGGAGCACTTATGGGTT
ACTACCCGTGTGCCATGATGTTGATCCGTTG
>rnd-1_family-438#LINE/L2 ( RepeatScout Family Size = 116, Final Multiple Alignment Size = 100, Localized to 1000 out of 1011 contigs )
AAATCTATGCTAATAACAACNAGACAAAAGCTATACACTTTAACTGCACA
NAGNACGCTTCAACTCTACATCGGTAACAACCCAGTAGAAAGTGTAACTG
AGCACAAAACNTTAGGCNTGATNATTGATGGAAATCTAACCTTCAATTCT
CATGTNCAAGCNCTNGTGAAGCAAACAGCTAAAAAGGTATACCAGCTTGC
AAAAATTAAANACTTTCTGGATGAAAACACNAGAAAGATATTCTATACNT
CCCACATTCAGACNCATATAGACTATTGCTCCACAGTATGGGATGGCTGT
CCAAGTTCAGTCATCAAACGGCTNAAATCACTNCAAAANNGNGCCGTNCG
CTTAGTCAGTAATAATCATGGAAGAGACAGTTCCAGTNTATATAAAGATC
TTANGCTACTACCGCTCCGTAAACGNCTACTTTTCAATAAGGCCAAATTT
ATTCACAAAATCTTATCTNAAAATGCTCCANATTACCTTTGGCCGTTGTT
TAAATATAATGGAAGACATAGCAAACGCCTAAACATATTACATATCCCTA
AACCTAGAATAGACCTATACAAAACAAGTTTGGCGTACTCCGCAGCTCAT
CTGTGGAACCATCTTCCACAACCGATCAAAAATACCAANAGCCCCTATAC
ATACAATCGGAAACTNTTTGAATATTATCTNACCACAGACTACATGCCCC
CTTAGAAGATAAAGTATNTTAAGAATAGCGTTGATTTC
>rnd-1_family-271#Unknown ( RepeatScout Family Size = 330, Final Multiple Alignment Size = 100, Localized to 1000 out of 1011 contigs )
TATTACTGTATGCATGTATATGTGGGTATGAGTGTGCATGTGTGTATATA
TATGGGAGCGTGTATATTTATATATTTGTGTGTGTATGAATGACAGTGCA
CTCAAAGAACCCATAAATTGTGTTGCTGCATGTCTGTTAATTAATGAGAA
CAAATGGAATGAAGTGTGTACGCAGCAAGAACGTCATCAACACACACCAT
CCACCAGAACATGATAAGACAGTACCGGACAGGTCACATACCAGTAACGG
GACATAACTTAAAAGTGACACGACCAGACGANATTACAGACATAGCGACA
CAAAACGCACAAGACATGGAAGAGTGAATGTCNCTACGTGTGGATGTACN
CGTTTTTTATGAATGTAAGTACAGGCATTGGTAGACGCATATGAAAGAGT
NTGCGTGTGTACGNAATGTCAATTAGGTATGCATACACGGATAAGTATGA
AAGGACGTGCAAACATGTAGTGTTGTCTGCGTGTATGAGTACTCGAGTGC
ATGTACGCATACACCTAGTTGTGTGCGTCCATATACTCCGGGGATTCATA
CACAAAACCATCCCATTCCACANCATGCATACAACATGCACATGACCGGC
GGGACTCACAACAAGATATGACTGACAGCAAATAGGGAAAACAAGTGACT
CGATANTGACAGGACTAGAACGCATAACCACCAATACCACCCCATCACTG
GGATGATAGCAAAGGTTGGTAACGTGATACGCATAGTCCCGGCNAAAGGC
CACGCTAGAATCCAGCAAGACGGCAACGACGAGAANTGACTGAATGGCCT
CCCGCCCCCTTTCCCCTCACCCTTCCCTACCTCTTTCGGATGCACTATGA
GTTTAACCCCCCAACCCATTCCCACAGAGAGCACTTGAGTTCGTTACCCA
ACATGCCACAGCAATTCTCATCGCCGAACATTTGGATCTCAAAGCGTGAG
CTGGACGCTCCGGTTATATGGTATTTACGTACACCGGAGCCTAGCTGCCA
ACATCTCAAAGCGTGAGCTGGATGCTCCGGTTATATGGTATTTACGTACA
CCGGAGCCTAGCTGCCAACACAACCCGATCACACAATAACAAATGACGAC
TGGACCCGCTTGAGGCTCCACATAAACTCTCACACACATATCCACGACAT
GACTAACCCGTTCTTATTGCAGGAAGACAACTATAAGACCACTATGGTCA
CACGCGGAATATTTTCACATTTCGGAACTATCCAAANTCAAAAACTGTTT
TCAGTACTTTTTGGCAAAGTAAAATACTCAAAATTTTAAAACTATAAATG
GTGGTCCAAAGGACGTTGTGTATGGAAGCTCGCTCTCCTACGAGATACGC
CTGGCCAAATCAGAGGGAGACAGAACAAACAGGAAACACCAAGAAAGAAG
AGGGAAGACATGCACCAGTGACAACAGGACGAGCGGTCTGACTCGGANGG
AAGCATCAAGCCCAGAAACGGCGCAAACACCAGAATTTAGTCACGAAAGT
GACGCAAATAACCCAGACCACAAATATAGGCGGAGACTGTTAGCAGCCTC
GGCTAGCTAGCAGCAGTCTGAACGTGGTCGAGCTTTTTTTTTTTTTTCTC
AAAAGGACTTGGACTTGGA
>rnd-1_family-154#LINE/RTE-BovB ( RepeatScout Family Size = 754, Final Multiple Alignment Size = 100, Localized to 1000 out of 1011 contigs )
AAGACAGAAGGAAAATAGTCACGACAGAAATGAAATGTTTACGTACTATG
CTAGGTGTAACGAGGAAAGATCGACTTAGGAACGATGATATCAGGAGGAG
AGTCGGCACAGAACCAATACTGAACTTTATAGGTAGACAACAAATCAAAT
GGTTTGGCCATGTAACAAGATTGGCATCAGACAGGGCACCACAGAGAGCA
ATGTTATACAGATACAGCGGTAACAGANCCAGAGGTCGACCACGCAGAAN
ATGGACCGCAGAAATATCAGAGACACTGAAAAGTACTTTATACGAAGCGA
ACAGAAGGGCCCGTTCCAGAGATCTCTTCCTGCCCTGACGCCGCGAGGCA
TTCCAGGAGTAGAGAAAAGAAGAAGAAGAA
>rnd-1_family-368#DNA/hAT-Charlie ( RepeatScout Family Size = 174, Final Multiple Alignment Size = 100, Localized to 1000 out of 1011 contigs )
GGTGGGCCGCGAAACAATTTCCCCTGTTTTGGTGGGCCGCGGGTGTAAAN
AGGTTGAGGAACACTG
>rnd-1_family-11#SINE/tRNA ( RepeatScout Family Size = 5026, Final Multiple Alignment Size = 100, Localized to 1000 out of 1011 contigs )
AAAAATGACCTTGGCTCCCAGGTCGACCCAGCCTTGAGTGGGTACCGGGT
GCAGTCCCGGGAAGTAGAGGCGGCCGGCGTGATGCTGACCACATCACCCA
TCTTGTGCCGATTGGTCTATAAAAATATAGGTCTAGCCCTATATGCCCTA
TACGCCTAAAGGCGTGGAAAAGGGTCCTTTACTTT
>rnd-1_family-356#Unknown ( RepeatScout Family Size = 184, Final Multiple Alignment Size = 100, Localized to 1000 out of 1011 contigs )
AGGTGGCAACGAACCGCCAGACATGGAGAGCTATGACCTCTGCCCTATGC
GCCGCCCT
>rnd-1_family-354#DNA/hAT-Blackjack ( RepeatScout Family Size = 187, Final Multiple Alignment Size = 100, Localized to 1000 out of 1011 contigs )
CAGTGTTGCCACTTTTCTTTGACAAAAAACATCCAAAACGGAGTCAAAAA
ATATCTAAAAACATCTAAATTTGCGTGGAAAACATCTAGAAAAAACATCC
AAATGGAAAGAGTCACAAATTACATAGCNATTGATATGACTTACCCTATA
GAATCATGTCCTCATCTTTACTGAAGTCTGCCTCACAAGATCCACAGGAT
AAACTTAGCTTGGATGATGAAGTTGAAGCTTCAGATCCAAAATGACTCTG
GTATGCTTTAGCTGTTCCAATTTCTTTTAATACCCAATCAGGGAGCTGAT
AAGTGGAACAGCCTTTTCCTACTCTTATCAGGCCGAATTTTATTGTCAAG
ATAGCATTTAAGAGGTCAAATTTCATCCTGTTTCTTAGGTTAGATTTGAT
AAATTCACTCCAAATGAAAAACATCTAGAAAAACATCTACCATCTAAACG
TCAAAAACGCCATCTAAATGCAAGGGAAAACATCTAAATCTGGATGTAAA
ACATCCAAAGTGGCAACACTG
>rnd-1_family-207#Unknown ( RepeatScout Family Size = 493, Final Multiple Alignment Size = 100, Localized to 1000 out of 1011 contigs )
TAAATTTGAACAAAGAAGACACAAACAATAGATTGCACAATTTATTGCCT
GGCATATTTCGCTGTATCTCGTCAGGTGCATACTACAGTAACAATTACAT
AAATGAAGCAAATAAGTGAATCCTTTATAACTGAAGCACAAATT
>rnd-1_family-278#Unknown ( RepeatScout Family Size = 309, Final Multiple Alignment Size = 100, Localized to 1000 out of 1011 contigs )
TTCATTGTTCATTTTAGAGATCATCTTCATCGCACATCGGACATGACCAT
AAGTGCTCCGATCTCCTCCTGAGTATGTCTCCAAGT
>rnd-1_family-406#Unknown ( RepeatScout Family Size = 137, Final Multiple Alignment Size = 100, Localized to 1000 out of 1011 contigs )
GGGTTTCTGGGATTTGCTCCTGTTGGATTCTCATCCGAATAGTGGCTCTT
TGAGTCACCGGGTGTTAATCTTTCAG
>rnd-1_family-401#Unknown ( RepeatScout Family Size = 140, Final Multiple Alignment Size = 100, Localized to 1000 out of 1011 contigs )
AGTGAGCTTTGNTCAGTTGCAGTGAACTGTTNGTCAGTTGCAGTGAGCGT
CTGGTAAATTGCACTGAACTGTTGTTATGTTGTAGTGAGCNGCTGGTCAT
TTGCAGTGAACTTTGGTCAGTTACTGTGAACTGTTTGTCAGTAGCAGTGA
GCGTTTGGTAAATTNCACTGAACTGTTGTCCAGCTGCAGTGAGCGTTCGG
TCAACTGCACTGAACTGTTGTTCAGTTGCAGTGGGCTTTTCTTTAGTTGT
AGTGAGCTGGTTTTCAATTGCTGTTGGCTGTTGGTCAGTTGTAGCGAACT
GTTCCTCAGTCACACTGAACTTTAGCTCAGTCACAATGAACTGTCATTTG
CATTGAACTTTTGCTTATTTACAGTGAACTGTTACTNGAGTTGTAGTGNG
CTGTCAATTACAGTGAAGTTTTGGTCAGTGCACTGAACTGTTGNTCAGTT
GCAGTGAACTGTTGGTCAGTTGCAGTGAGCTTGTATATCCTGTTTAGACA
GGAACTTTTCTGGTTTGACCTTTCTTAGCCTTTAATTGCCTCTCGTCTAA
CTACAATGCAGCGGGTTATTACAAAGCACGAGCCTCGAAGCTTNATAAAT
CCCAATAAGAATTGTACTGGTGAACCAAACGGGGCAGTTCATCAACGTCT
ATCAATATGTATGTCCGGCGGTCTCATTATTTCATTCTCTTTCTNTTACC
TTCTACTTCCCTCATGATTGTTGGATGACAATNGGTCTGTTCCACCCTCC
CCCCCCCCACCCACCCTAACCCATCCTCACCCGAACNTCCAAAATTGGCG
CTGCGAAACTCACACGGGATAATAGTNTACGAGTTGGCTCTCCACAAGCC
GCTAACCTCTCCGAGTTGGTATTGTCCGGCAACATTAGAATTTCTCAGTG
TGCGGTTGTAGAAGGAAACACTTGGGAGCATTCGCGATGGGAGCTCACGT
GCTGGCACGGAAAGTGAGGGGAGGATAGATGTGAATCCTACAGNGTCCTT
CACTTGGAGACCAGACACATGGTGGATGGGCCATCTTGAGATGTAGGA
>rnd-1_family-189#Unknown ( RepeatScout Family Size = 542, Final Multiple Alignment Size = 100, Localized to 1000 out of 1011 contigs )
CCCATCCGCGCCGCGCGTAGCGGCGCGGGGGATACGGTCGGCGGTGAGTT
TAATCGGAGGAACACTATCGCTAACCTGCGTCGGAGCGCGTGGTCTCCCC
GCCATGTCGCTATTATCGTCTGTANTGTTGCGTNTCTCGAAATTGTCAAC
GGACAGTAATCCTAGTTTTGCCGCGATTTGTTCGTCGGAGGAAGTCCGCA
TTTTACACACGACTGAGGCCCTGTTAGGGTATTTGTTTGGCCGCCATAAT
ATGGGGTNGAAGTTCGGAGGAGAGCC
>rnd-1_family-303#LINE/RTE-BovB ( RepeatScout Family Size = 261, Final Multiple Alignment Size = 100, Localized to 1000 out of 1011 contigs )
TAGAAATGGAAATGGTCAAAGAATATTGGATCTGTGCAGCCAGCACGATC
TTTTTATTACCAACACATTCTTCGANCATAGAGATTCACGACTTNACACN
TGGTACAAATGGAACGATGTCTCCATCAAGAGCCAGATTGACTTTATACT
NACCAGAGTTCAAGGAAGAAGGAGAATTCTTGATTCAAGAGCNATCCCNA
ATGGTCTACGTGACACTGACCATAGAATAGTTGTGTTAACAGCAAAACAT
CTTACGTTAAAGAAACACAGAAAGAAATTAAACAAAAACAAGGATCTCAT
CAAGATAGCAAATCTGAAACAGGAAGGAGTAAAAGAACAGTTACAACAGA
AAGTAGAGACGGCATTCAAACAACTTCCACATGTAGTCGGCAATATTGAG
GAAGAATGGAGTAAATATAAAAACACTATGCTTAGTATCGCAGAAGAATT
ATGTGGAAAACGGAAGAGTGGAAACAGACGGGGAAATAACAAATATTCAC
CTTGGTGGTGCGAAGAAGTAAAAGAAGCAGTTAAAAAGAAAAAAGACTTA
TATAAACAGTGGATAAAATCAAAGAAAGAAGAGGATTATATAAACTACAG
ACTGCAAAGGAGAGAAACCAACAGGAGTGTCAAGAAAGCAAAACAAGNAT
CCTGGGAACGTTTCGGTGAGTCACTAGCAGAAAATGAGAAAACAGCCAGC
AGAAAATTTTTCAAAGTAGTTAAAAATATGCGAAAAAGAGATGAGAGCTA
CAACCCAACAGAAATNATTAATGATAAGACAGGAAGGCCATTGATAGATC
CACCCGAGATAGCAGAAAGATGGAGGGAATACTTCAATGAGCTCTTTAAT
CCTCTAGGAGATCATCAGGAAAGAACAACTGAAGAGCACAGAGCAACAGT
GTTAGAACCACACATACTAATGGATGAAGTAGAAAAAGTCATTAAACAGT
CTCCCAAATATAAAGCACCAGGAGCTGATAGATTACCAACAGAAATAATC
CAAGCAGCAGGNGAAAGCAGCATCAGATGGCTNCACAGAATATTCAATGC
GGCATGGGTACAACAAACGGCCCCNATTGATTGGCAACATGGCAATAGTT
ATACCATTGTGGAAGAACAAAGGAAGCAAGCGAGAATGCGGTCAATACNG
AGGCATCTCTCTTTTAAGCCACGTTGGNAAAATGTATGCCAAGATAATAG
AAACAAGACTGAGACCAGTGATAGAACCACAGCTGGCAGAAGAACAGATG
GGATTTAGGAGAAATAGAAGCTGCACAGATGCAATCTTCACACTTAAACA
GTTAATAGAAAAGAACATCGAATACGATAAGAACTTATTTGTGGCATTCG
TAGACCAGGAGAAGGCATTCGACAGAGTCGACAGACAATTATTATGGAAA
GTAATGGCAAGATATGGAGTAAGCGAACACCTCATCGAAGTGTGCAAAAG
TTTATACAGGGATTGTAGAAGTGTAGTTAGAATAAATCAGGGAACATCTC
ATCCTTTCACAGTGACATCTGGAGTAAGACAGGGGTGTGTCTTATCACCA
CTGCTGTTTATCACCTACAT
>rnd-1_family-181#Unknown ( RepeatScout Family Size = 584, Final Multiple Alignment Size = 100, Localized to 1000 out of 1011 contigs )
TTGATACATGACAAGGCAGACAGATTGGCTAGATCTGCACCATTGGGTGG
AGAATTGATACATGACAA
>rnd-1_family-281#Unknown ( RepeatScout Family Size = 303, Final Multiple Alignment Size = 100, Localized to 1000 out of 1011 contigs )
GAAACGAACCCACGACCTTCAGAGCGCGAGGCAAACGGCTTGACCACTTC
GCCACGGAGA
>rnd-1_family-284#RC/Helitron ( RepeatScout Family Size = 297, Final Multiple Alignment Size = 100, Localized to 1000 out of 1011 contigs )
TATCTATATATATAAAAATCAATGTTTGTGTGTTTGTTTGNCCCCTATAG
ACTCGGAAACTACTGAACCGATTTAGCTGAAATTTTCAGGATATGTTTGT
TTTGATACCGGATTTTGAACCGTCGTGGTTTGAAATTCAACCTGTCACTG
TTAGAGATAGGTGACCACAATTTATGCCAAAATATTCGAAACTAATATTT
ATAACTTTAGTGATTTCTAATTATAGCCACGTTAGTAATTGCGCATGCGC
CGTAGTCAGAACGCAAGCTTCCGCCATTCGCCGGCGAGTTACGTGCAGCC
AACGCCTTCTCTAATAACATAGAGTAGGTCGTGGTACAGCAAACAAGACT
ATCTCTATATCTGTGCAGGCAATGATTGCCACAATAACCATATTAGACAC
GATTTCTATTTTCTGTTTTTT
>rnd-1_family-178#Unknown ( RepeatScout Family Size = 602, Final Multiple Alignment Size = 100, Localized to 1000 out of 1011 contigs )
TTGAGCCTGAGGATTTAGGGCCGCATGGCTAGTGCTGTCGCCACGGACTG
TGCAGGTNAGGATTTT
>rnd-1_family-58#Unknown ( RepeatScout Family Size = 1965, Final Multiple Alignment Size = 100, Localized to 1000 out of 1011 contigs )
AGTCATCTCCTTGTGAGATGCAATTTTTCGTTATTTGAAGCCCTACTCTG
GCTCTTGCCAGGGGCCGCAATATAGCCCGGCCATAAATATGGTCTAATGG
CTGAACGCGGTTTCTGGGACCTCTCCACGGGTGATCCTCATCCACATGGT
GGCACTTTGTGTCATCGGGTGTTTATCGCTTGTGTGATGTCCTGGTGGGG
TAAAAATCTACTACTACTA
>rnd-1_family-85#SINE/tRNA-Deu ( RepeatScout Family Size = 1382, Final Multiple Alignment Size = 100, Localized to 1000 out of 1011 contigs )
GGGGCTGCGTGGTCTCGAGGCATGGCGTCCGCCTCGAGTGCTGGAGGTCC
CGGGTTCAAGCCCCGGTGAAGGCTGGGATTTTTTCACGTGGACTTCTAGT
AATTTCCCCTGGTCTCTGGGTAGTAAGATCGGACGCCCGTGTGTATTGTT
GCGCACGTAAAAAAATCCCTTGGCAGTTGGAAATCGAAAAGAGTAGCCTA
ACGGCGCTGCCCGGGCAAAATTTGGAGTTAAAAATCTACCCAAAGTATTT
CAGGATCCTCGCCGGTGCNACGGAGTTCGTGCACTGCGCTGAGATTCTTC
GGACTCAGGCTTGAGTTAGAAGTAGAACGGAGCACTTATGGGTTACTACC
CGTGTGCCATGATGTTGATCCGTCGAATAAACATAAA
>rnd-1_family-137#Unknown ( RepeatScout Family Size = 893, Final Multiple Alignment Size = 100, Localized to 1000 out of 1011 contigs )
AGTAGTGACNGTTTTTGTTGTTGTTGTTGTTGTTGTGACGGTGGTGGTGG
TAGTGGTAGCAGTAGTACTGGTACTCGATGGGTGATGTGGTAGCTGTTAC
ACTGGCCACATTTACTTCTCANTACAGATTAATGCTACCCATTTTAGTCC
GGGTGGACACGGATGCCAAGCTCAGTTTAACAACAATATTTCGTCAGGCG
ATGACTTTCCCATCCTTCGGAGAGGATGATACGATTGTCGGGGGAGGGGG
GGGGG
>rnd-1_family-148#Unknown ( RepeatScout Family Size = 795, Final Multiple Alignment Size = 100, Localized to 1000 out of 1011 contigs )
GCCCGGCTCTCTAGCGTAGTTGGCTAAACCGGATTGCGCGGTGACCGGGT
GACGAACTCCTTGTGGTCCGGGTTCACTCCCGGGGGTAGGCAGAAAAGCC
ACATTTCTCCCAGATTTACGGTATTTACAATGGAATCAAGGCCGAAAGGT
TGCGATATCCATAATACCGAGCCTAAGGGTTAACAACTCATGGCTTCTGG
ATACTAAAACAAACAAACAAA
>rnd-1_family-269#Unknown ( RepeatScout Family Size = 335, Final Multiple Alignment Size = 99, Localized to 1000 out of 1011 contigs )
CAAGCATGTCGTAAAAGGCGACTAATTAAGGGTTTGCTGAAATCGGATGT
GTTGGGCCGAAA
>rnd-1_family-439#LINE/RTE-BovB ( RepeatScout Family Size = 114, Final Multiple Alignment Size = 99, Localized to 1000 out of 1011 contigs )
TGGCGCAGAAACNTGGACAATGAACAAGCAACTAGAAAATCGAATCGAGT
CTCTGGAGATGTGGATATACAGAAGAA
>rnd-1_family-357#Unknown ( RepeatScout Family Size = 182, Final Multiple Alignment Size = 99, Localized to 1000 out of 1011 contigs )
AACCCGGGTCTCCCGCATGAGAGCCCAGCGTTCTAACCGTTCGGCCAGC
>rnd-1_family-263#Unknown ( RepeatScout Family Size = 348, Final Multiple Alignment Size = 99, Localized to 1000 out of 1011 contigs )
TCATCATCATCAGGTGCCTTGCCGACTGGCGTGGGCGATCATGCCTCTGA

>rnd-1_family-186#LINE/RTE-BovB ( RepeatScout Family Size = 554, Final Multiple Alignment Size = 99, Localized to 1000 out of 1011 contigs )
TTTGCATTGGAACCCACAGGGGCATAGGAATAAAGGAAGGCCAAAAAACA
CATGGAGAAGAGAGCTGGAGAATGAGGTTAGAAAGATNGGGAGGACATGG
GGAGAGCTCCATGCAATGGCGAAGGATAGAACGACTTGGCGTGAGTTGGT
TGAGGGCCTATGCTCCATTGGGGGATAGAAAGGCAGAAGAAGAAGAAGAC
TGTGGCAATAT
>rnd-1_family-443#Unknown ( RepeatScout Family Size = 113, Final Multiple Alignment Size = 99, Localized to 1000 out of 1011 contigs )
AGCATTAACTATGCGTCTCGTAAACAGGTCACTATAGACAAGTCGGAAAA
GTGACATTTACGGGGAATTGGACCCAACCGGAAGTGTCGGTTTTGCGGCT
TCTCGGGGCGAAAGGGTTA
>rnd-1_family-199#Unknown ( RepeatScout Family Size = 506, Final Multiple Alignment Size = 99, Localized to 1000 out of 1011 contigs )
GATGCATTTTTGCTCCATTTGTAGACTGGATATAGTTTCGTCGCCCAGCT
NCTGAGTTGAGTGCNTGGCGCGACACTGTGAGCTGCGGATTTCATTTGGA
ATGTTTTTT
>rnd-1_family-333#Unknown ( RepeatScout Family Size = 210, Final Multiple Alignment Size = 99, Localized to 1000 out of 1011 contigs )
CCTTCTCTATCTTCCTGAGCATACTCATTGAGTCACTGAGAAAGCACGCG
CGGGTGAAAGTCTGTGTCTCNAGCCATGTTANCGCTTTNGTCACTGCCAT

>rnd-1_family-451#RC/Helitron ( RepeatScout Family Size = 105, Final Multiple Alignment Size = 99, Localized to 1000 out of 1011 contigs )
TATCTATATATATAAAAATCAATGTTTGTGTGTTTGTTTGCCCCCTATAG
ACTCGGAAACTACTGAACCGATTTAGCTGAAATTTTCAGGATATGTTTGT
TTTGATACCGGATTTTGAACCGTCGTGGTTTGAAATTCAACCTGTCACTG
TTAGAGATAGGTGACCACAATTTATGCCAAAATATTCGAAACTAATATTT
ATAACTTTAGTGATTTCTAATTATAGCCACGTTAGTAATTGCGCATGCGC
CGTAGTCAGAACGCAAGNCTTCCGCCATTCGCCGGCGAG
>rnd-1_family-318#Unknown ( RepeatScout Family Size = 238, Final Multiple Alignment Size = 99, Localized to 1000 out of 1011 contigs )
GTGGAGCAATGAGGTATCTACTTGACTTTCCAACAATGAACCAAAGGATC
AGGATGTGGAGGGCTCGGGCATACCTCAAAATATGCGCTGATAAGAAACA
CCCACTGCATCAAGCGCTTTTTAGTGAAAAGGGCGACAGACTGAAGAGGG
GGAAATCGTGGCTAGGTCGGGCAGAAGATGTTATTAGGCAAATATGCAGC
CTAACCGACATCATACCTGGTGCAGAATGGATACCTGTGCCTCAGGCGTT
TATTTGTACATTTTCCTGTATCGTCACGCTCGACAGGCGATGTAGAGAAG
AGAATCCTGTTGCTGTTAATGCAGAGGTCAACGCTCTCATCGGTGAAAAT
TCAGACGAAGCAGATG
>rnd-1_family-163#Unknown ( RepeatScout Family Size = 681, Final Multiple Alignment Size = 99, Localized to 1000 out of 1011 contigs )
TTCCATTTCTTACCACTCAAGGCTGGGTCGACCTGGGAGCCAAGGTCATT
TTTGAAAAAAAGTCCGGCTCCGTCAGGANNCGAACCCACGAC
>rnd-1_family-267#Unknown ( RepeatScout Family Size = 338, Final Multiple Alignment Size = 99, Localized to 1000 out of 1011 contigs )
ACAGAGTCCGCAAGTCTCTTGAGAATCGCTTTATTTACACTTTGGGNACT
TTAACGCCCTCCGGAACTGAACTGCCAACACAGTTTCATCTAAACTCCTA
GGGGACTGAACTGCCCNCACAGTTTCATCTCNAACCCCCCAGTTACGGCC
CCTGGTACTCCACAGGGTATTTATTCCCCCGGCCGACACGTGTCGTCATT
CTGCTGAGAAACAATCGACCCGGCTGCTTCGAGATACCAGCTAAGTGATT
TTGTGTATTTGTGTAGTATTGTTTGATTTGTATGTGCTGATGAAGGCTCC
ATAGCCGCAACGTTCACGTTTTGTTTGTGTTTGTTATATTGTGAAGCTTG
CTGATATACTTTTCGTTCGGTTTTATATCTTTTCTTGATA
>rnd-1_family-390#Unknown ( RepeatScout Family Size = 153, Final Multiple Alignment Size = 99, Localized to 1000 out of 1011 contigs )
TGTCACATACCGCTCGTGTCGCGTGCCTGATTTAAGGATTTCTCCTTAAG
AACCAACAGCACTCTGAAATAATAATGTTGAGNCGTCGGCTCGTATTGGT
CTAAGGGATATCCCGCGGCCAATATACGCCCA
>rnd-1_family-213#LINE/I ( RepeatScout Family Size = 484, Final Multiple Alignment Size = 99, Localized to 1000 out of 1011 contigs )
GCCATCTCNAGGCTNAAGNTGAGAAAGTCNCCAGGNNCAGATGGAAATCA
GCAACGAAATGATCANNAACCTAGGANCANCTGCCAAAATAAAGCTGCTG
CAGATNTTTAACGNCTGCTGGGCAAGAGGNAATGTTCCTCAAATATGGAG
AGAAGCAATCACGATACCCCTCNTAAAACCAGGGAAAGACAGTTCTAATG
CCTCCAGCTATAGACCGATCAGTCTCACAAGCTGTCTCTGTAAAACAATG
GAACGCATCGTCAACCTCAGACTNCAATGGTACTTNGAAAGTGAAAACAT
CTTNACGCCGCAGCAGGCGGGNTTTAGANAGTGCTACTCCACAGAAGACC
AGACAACNTACCTCTCACAAGAAATAGAGGATGCCTTCCAAGANAAGAAA
CTGGTNCTNGCGGCATGGATAGATTTNAAGAAAGCTTTTGACAAGGTCTG
GAAAGANGGTCTNTTGAAGAAACTGAGAAACTATAGAGTNAATGGAAANA
TGTACAAATGGATCAAAGCATACTTACATAACAGAAGAGCCCGAGTACAG
GTAGATGGNCTTAAGAGTAAAAAAGTTTTACTGCGNCAAGGCGTCCCNCA
AGGNGGTGTCCTGTCNCCCACACTCTTCCTTNTATTATCAACGACCTGGT
TGCTGAAATACCNAATGGAATCAAAGCTGCAATGTATGCCGACGACCTGG
TACTNTGGTGCACCGATGAACACGCGACGGTGGCCACAAGAACGCTACAG
CGGGCNACAGATGCACTTGAGGCATGGGCCGATAGATGGTGTGTCAGCAT
CAACACAGACAAATGTAGCACCACACTCTTCACCCTCTCCCCAAAGCAAA
AAGCNGGCGCCATCCANATAAACGGAATACCCCTGAGAGANGATAAAGAG
CCCACATACCTCGGAGTNACGTTTGATGACAGGTTGACATGGAGAAAACA
TATCAACAAGGCAGCAACCAAAGCCAGGAGGAAGACAGCCATACTNAGAA
AACTAAGTGGAACCACATGGGGAGCGGATGGGAAATACTCAANAAAGTNT
ACAAGCGGAGCGTACGACCACACTTGGAATATGGGTCAACNGCATGGTGT
TCAGCATCTAGTACCACATTANAGGAGTTAGACAAAGTGCAAAATCAAGC
GCTCAGAGTCATCACAGGAGGNATGAAATCAACNCCCATANTAGAGATGG
AGAAAGCTGGGANAACGCAGGCACTGAGAGAACGCAGAGACACAAAGTTG
CAAATACAAGCNGAAAAGTTCCTCAGTATGCCAGATCACCCGATGAANAA
NAGATTTAAGAACCTAGCNTTGGGACGGCTAAAAAGAAGCAGCTTTATCC
ACCAGGCGAAAAGACTNNGNAGACAAACCGCTGACCTNCCAGAAATTGGT
TGNCCACTNAANAGTATTCCGGAACGAACCCCATGGAGAGAGAAATGTAA
ACTAACGGTACAAATCCAGACAAATGTGAAAGGGATATTTTGACAAGAAA
GAGCAAGATAGTGTACAACGCAGAACGGCCACCCTCAGTTATATTGATGA
AGAATACCCGCAAGAACAATGGGTCAGAGTCTACACAGATGGGTCAGCAG
AAAGTGCAGTTAGAAATGGNGGTGCTGGAGTGTACATCGAATTCCCAGAT
GGTACCAGGGATAAGTCCAGCGTACCAACCGGAAGTACTGCCACAACTAC
GATGCAGAAACTCAGGCTATCAAGATAGCNGCAGAGAAACTGCTAAATAC
CAATCTTGGCTCACAGCANGTGGTAATGCTNACAGATGCGAAATCAGTAC
TTCAAGCACTCCAGTCTGGGAAACTACCAGANTTGCAAACACTGCTGACA
CAACTCGGCGTTCGGCGAAGAGTCGTAATGCAGTGGATACCGTCCCACTG
TGGNGTGCCNGGAAACGAAAAAGCTGATAAACTNGCTAAGGAAGGTGCGA
NANAAGAGCAGCCGGATGTACCAGTCACATACCACGAGAAGAAAAGGATC
ATCNAGTCNATCAGGAAGCCANCAGNCCCGGCACAAGACGACTACCTTAT
TATGGACAGACCAGGGCAGGTCATTATCCTNCGCCTCAGGACAGGGCACA
ACCGACTCGTAACCAGCATGTGCACAGGNTTCAAGATAGGCGTATCAGCC
ATGTGCNCTTGTGGGCTATGTGCGCAGACNACAGAACATGTCCTNCAAGA
CTGTCCCNTGTTCGGCNCATTAAGGNAAACCTNCTGGCCAGAAAGAACAA
CAGTGGAACGTAAACTNTATGGACCACTGAATGAACTAACAAAGACAGTN
AAGTTTATCACAAGAGACNNGTCTGCCGGTGTAGACAACTTATTTCAGAA
AGCGAACGNAAGAAGAAGAAGAAGA
>rnd-1_family-453#Unknown ( RepeatScout Family Size = 104, Final Multiple Alignment Size = 99, Localized to 1000 out of 1011 contigs )
TGTCGTATGGCAGTTTTGTCGCGCACCTTTACTTACAGGATATTTTCACA
AATCCCTCAGGCGCTCTGAGACAGGAGTGTTTTGAATGGTGGCTCTCGTT
CGTCTAGAGGCCTAACCCTCGGTTCAAACTTTCCATTCAACCTATCTCAG
GGATGAGGCGACTCGAGCTCTGACTCCACAGGGTTATTACGAACTCTTGG
GTACNNCTCGGCCAGACGTCCTCACCACTGTTTGCCCCCAGACTGGAACA
ACGTAAACNCAGTCGAACAAATAANCAACAGTGAATATGACAAGACANGA
NTACCTTTCTGACTACGACAATNAATTCCAATTAGACGAAACTTTCCTAA
GAACAGAAGGCTNATGAACTAGAACTTCAATGTAATAAATNCNCCGTAAC
CAAGCTGAAGAAAAGTAGCNCGAAGAATTAACTGAANGAATGTTCAANTC
TTTGAAGAACAAAGNTAGAGAAAGAGTCTTCCCCTACATCTACGTCTCTT
TCCGGTATCATCATNGCTGAGGNATGAGACGGATTACGAAGGCACATCTG
GANTCGAGCCGCCATANGGTGTCACTCTGACTTATCTGGTCGGATCCTGC
AGCTCCTCAGGATGCCGGAGTGGAGTTTCNCACCGCCGTACTTCACGGCA
CGACTTCACAGGAACGAAGCAGCTTCTCAGGATGCCGGAATGGATCTTCA
CGTCCGCTTCCCAGCACGACTTCGCANGAACGAAGCAGCTTCTGGCGTTG
ATCGAGGACAATCAACTCGAGATCGGAAGACGTCGACTCAAGTACCGTCC
ACACGTTCAGGACCGCAATTCACCACACGTCAATTGCTTACCGGGTGGTG
GCGGAAGGAACCAGNCTACCAGACACNGACGCTTGTTGGATCTTCANAAC
CCATGATAAATGAAAAAGAGAATAAAGAATCTTGTCTTTTTAACGGTCAA
GTGGCNACACAAGGAAANACGTCTGCCCACTTGAACGGACTGTAGAGAAG
TGACGTACANAANCACAGTCCCTAACTACGGCAGTTGGCGTAAGAATACG
GCTCACTAATGCAGTGAAGCGGTCAGACAATTNATTTTGAATAGGCGTAG
AAAACGTGTCCTAACGTGCAAATCGACACTAAAAGCCTAAAAGAATCATT
ATCNAAGNGTTTTATATGGATTTCTCCCATCTGGACTCCCCCACAACAAA
CGAACTATATAACTACGGTCGGNCTATCCGATNNCATAGTTACAATGACG
ANTTTGGGGGTGTTCAGACTGTGGACCTGCCTACTGCGGTAGGTGTGTGG
ATGCTGTCATGCGACA
>rnd-1_family-454#LINE/RTE-BovB ( RepeatScout Family Size = 104, Final Multiple Alignment Size = 99, Localized to 1000 out of 1011 contigs )
ATAAAGCACCAGGAGCTGATGGATTACCAACAGAAGTAATCCAAGCAGCA
GGNGAAAGCAGCATCAGATGGCTNCACAGAATATTCAATGCAGCATGGGN
AGAACGAACGGCCCCNATTGACTGGCAACATGCAATAGTTATACCATTGT
GGAAGAANAAAGGAAGCAAACGAGGAATGCGGTCAATACAGAGGCATCTC
TCTTCTAAGCCACGTNGGNAAAATGTATGCCAAGATANTAGAAACAAGAC
TGAGACCAGTGATAGAACCACAGCTGGCAGAAGAACAGATNGGATTTAGG
AGAAANAGAAGCTGCACAGATGCAATNTTCACACTNAGACAGTTAATAGA
AAAGAACATCGAATACAATAA
>rnd-1_family-72#Unknown ( RepeatScout Family Size = 1619, Final Multiple Alignment Size = 99, Localized to 1000 out of 1011 contigs )
ATCTGAGTTGATCTGAGTCAAGAATCGACATCACAGCACTCGGGGCANTC
CCATANNNGCTCCGTCCCCATCTTCAGCAGCCAGCGAAGAGTTCCGATAC
TGATGGTACCNGTCGCNATCTGGTTAAACGTCCGTCTTGCC
>rnd-1_family-123#Unknown ( RepeatScout Family Size = 954, Final Multiple Alignment Size = 99, Localized to 1000 out of 1011 contigs )
TTTCACACTTGACGAGATACTCTAGATGAGAAATTGGACACTTTGGAGCT
CATTGGTGACAGAAAAATAGATAAGATAAAAGTGAAAAACAAATTTTAC
>rnd-1_family-247#Unknown ( RepeatScout Family Size = 375, Final Multiple Alignment Size = 99, Localized to 1000 out of 1011 contigs )
AGAGCGTCGCACAAAGCACGAACTCCGTAGCTCCGGCGACGATCCCCAGG
GATCTCCGTAAAA
>rnd-1_family-446#Unknown ( RepeatScout Family Size = 109, Final Multiple Alignment Size = 99, Localized to 1000 out of 1011 contigs )
CTGTCGTATGGCAGTTTTGTCGCGCGCCTTTACTTANGGATTATTTTCNC
AAATCCCTCAGGCGCTCTGAGACAGGAGTGTTTTGAATGGTGGCTCTCGT
TNGTCTAGAGGCCTANCCCTCGGCTCAAACTTTCCATTCAACCTATCTCA
GGGATGAGGCGACTCGAGCTCTGACTCCACAGGGTTACTATGAACTCTTG
GGTACNNCTCGGCCGGACGTCCCCACCACTAAGTTTGCCCCCAGACTGGT
AAACAACGTAAACACAGTCGAACANATAAACAACAGTGAATATGACAAGA
CATGAATACCTTTCTGACTACGACAATNAATTCACTAACACCAAACTTTT
CTAAGAACAGAAAGTCTGATGAACTAAAACTTCAATGTAATAAATNCNCC
GTAACAAGGNAGANGAAAAGTAGCNCGAAGAACTAGAANGAATGTTCAAN
TCTTTGAAGAACAAAGACTAGAGAAAGAGTCTTCCTACANNGCTACGTCC
ATTTCCGGNATCATCATGGCTGGAGGNNNGAGACGGATTACGAAGGCACA
TCTGGANTCAAGCCGCTACACGATGTCACTCCGACTTATCTGGTCGGATC
CTGCAGCTCCTCNGGATGCCGGAAGTGGAGTTCCGCANCGTCTCACTTCT
CAGAACGACTCCGCANGAACGATAGTACTTCTGGGATTGATCGAAGGACA
ATCAACTTCCCGGAGACCGGNAGACGTCGACTTCACGTACAGTCCGACAC
ATTCGGCAACGGCAGNTCAACACACGTCGGTTGCTTCCCGGGTGTCGGTT
GGCGGAAGAGCACGACTACGACACGGACGCTTGTTGGATCTTCAAAAATC
CTGAAANAAACAAGGCAACACACATGAGCGAACCGTACCCAACGCACCCN
GTTAATCANTNTCCTCACCCCCTCCACATGCTCAGATATANTTGAGGCTA
GTCCAAACCATGAAGGTTGACTTCCTACATCTCGGAACCCNTNCAGTTTC
CCAGAGTGAGCACTAGAGTCGTACGTACGTTTCTATTAACTCGAATAGTT
TCTGAATTCAGTCCTGTAGCGAAAGCCAGACAGATCTCTATCATTCCCCA
TCCCTCTAAATATACCCTTTTCACTAGTTGGAAAGATAAGGTATAGGAGA
TGAAGNCAAAACCAAGATCGAAGGAAATATGCTCCGAAAGCATTNCGACA
GTCTAAGCTTGTTGTGGTTACGGTAGCTCCTAGCAACAGCGGATATGACG
TCATGCCTGACCCGAAGCTCCTTGTCCTTTCCAACGGTCCAGCGACTCAC
CAAGTTCAGAGACCGAATAAAAGANAACAACTGATCATACAAAGTTAACA
ATACCATAAATACACTCCAGATATGTGGATTGATTGATCCGAAGAGGTTT
AGAAAGCCGGCTCGAAGAATTCNCCGAGAAATTTCAGCCGAAAGTGCATT
CCAACCNGGATCGCTATCCGCCGTCTTCCATCGCAGGCGATCGTAGACAA
ACAGATTCGCATTATCAATCTGCTGACCTTNCTTACACACACATACAGGC
ACTGAGCACAAATATTCAATTAAANCCTTTTAGGAAAACTCACCCATGAT
AAATGGATAAAGAGAATAAAGAANCTTGTCTTTATTAACGGTCAAGTGGC
NACANAAANGAAACACGTCTGCCCACTTGAACGGACTGTGGAGAAGTGAC
GTACANAANCACGGTCCCTAACTACGGCAGTTGGCGTAAGAATACGGCTC
AAGTGCACGTGAAGCGGTCAGACAATTNATTTTGAACAGGCGCAGAAAAC
GTGTCCTAACGTGCAAATCGACACTAAAAGCCTAAAAGAATCAATCTAAG
AGTGATTTATATGGATTTCTCCCATCTGGACTCCCCCACAACAAACGAAC
TATATAACTACGGTCGGACTATCCGATATCATAGTTACAATGACGATTTT
GGGGGTGTCCAGACTGTGGACCTGCCTATTGTGGTAGGTGTGTGGATGCT
GTCATGCGACA
>rnd-1_family-130#Unknown ( RepeatScout Family Size = 920, Final Multiple Alignment Size = 99, Localized to 1000 out of 1011 contigs )
AAATCATCATCATGTAGCAGGTCCTTTGCAGAACGTCGCTCTCATCACGG
TCTGCCTGAAAGAAACTCGGTCTCTCGCCAGCTC
>rnd-1_family-461#Unknown ( RepeatScout Family Size = 98, Final Multiple Alignment Size = 98, Localized to 1000 out of 1011 contigs )
TTCCCGGGAAAGTCCAATAGTATAGGGGTGTTAGGGTGTGAAATGAACAC
CGACTAACACTAACC
>rnd-1_family-398#LINE/RTE-BovB ( RepeatScout Family Size = 144, Final Multiple Alignment Size = 98, Localized to 1000 out of 1011 contigs )
TATACCCATCAAAAATAGTCAAGGAAAGGTACTTACTAACACTAAAGATC
AAATGGACAGATGGGCTGAACATTTCGAAATGCTTCTAAATAGACCAGGT
CCNGAGGTTCCCCCAGATATCCAGCCTTTAGAAATGGAACTGGATATCAA
CTGTGAGATACCATCCAAAGAGGAAATTAGAAAAGCTATCAATCTTCTTA
AGGAAGGAAAGGCGNCAGGCCCAGACGGTATCCCAGCTGAAGCCATCAGG
ACCAACGTAAACACATCAACAGAATTGCTACATAGATTATTCAGTAAAGT
CTGGGAGACCGAAGAAATACCAGCAGACTGGAGAGAAGGATATCTTGTGA
AACTGCCCAAAAAAGGTGATCTACAGGAGTGCGANAACTGNAGAGGAATT
ACGTTGCTGTCAGTNCCTGGAAAAATATTNAGTAGAATTATTTTGGAAAG
ATTAAAAGATGCTATTGATAAAATGCTAAGAGANGAACAGGCAGGTTTTC
GGTCAAACAGATCCTGTACTGACCAGATAGCCACATTACGTATTATAATA
GAGCAAAGCATTGAACTGAACTCACCACTTTACATTGGATTTGTGGACTN
TGAAAAAGCNTTTGACAGCATCGATAGGGAATCTCTCTGGAAATTGNTGG
GGCACTATGGAATCCCACAGAAAATTATCAACNTAGTAAANGCCTTCTAT
AAAGACTGAAACGCGATTCTCCTGCAGTGAAAGATACAGATGCATCTGAC
CAGTAAAAACAGGTGTGAGACAGGGATGTGTTNTGTCGCCNNTNCTTTTT
GGTACTAGCGATCGACTGGGTCATG
>rnd-1_family-441#LINE/Penelope ( RepeatScout Family Size = 114, Final Multiple Alignment Size = 98, Localized to 1000 out of 1011 contigs )
TCTAGTGGCCTACAGGCATGACCGTAACCTCAAGGACATTCTAGTCAAGA
GTCGGTTACGTCCCGCGTCCGAGTCCCACTTCGGCACGGTCTCTTGCCAC
AGACCTGTATGCAGGACCTGTCCATATGTGGTCCAGGNGGCCAGTCTGGA
ATTCCCNAATGCCACCTTCCACATACGTGAAGCATTCTATTGCACNAGCC
GCAATGTCATTTACGCCATCAACTGCAAGAGATGCGGCATGAAATACATC
GGTGAAACGGGTCTACGACTGGCTGACAGGTTCAGACAACATCTTTTGGA
TGTGCAGAACGGTGCCCTGAAACCAGTACCGTTGCACTTCAATTCCCAGG
ATCACCGAGGTGTCCACGACATGGAGGTGACAGCCATTAAATCTAGCCAC
TCCAGCGACAGAGTCCGCAAGTCTCTTGAGAATCGCTTTATTTACACTTT
GGGNACTTTAACGCCCAGNGGACTGAACTGCCAACACAGCTTCATCTAAA

>rnd-1_family-373#LINE/L2 ( RepeatScout Family Size = 168, Final Multiple Alignment Size = 98, Localized to 1000 out of 1011 contigs )
CATCCTCACTGTCAGCGCTACCCAGATTGAAAGACTCGAAAAGGTGCAAA
ATGAAGCCATGCGCATTATTCTGGGATGCACNAGAGACACATCCTGCGGA
GCAATGAGGTACCTNCTTGACTTTCCAACAATGAACCAAAGGATCAGGAT
GTGGAGGGCTCGGGCATACCTCAAAATANGTGCNGATAAGAAACACCCAC
TTCATGAGGAATTATTCAAGCGAAAA
>rnd-1_family-221#Unknown ( RepeatScout Family Size = 455, Final Multiple Alignment Size = 98, Localized to 1000 out of 1011 contigs )
TCTCTCTCCGCAGAACGGCTAGCCGCCTGCCGAGAGCGTCGCACAGAGCA
CGAACTCCGTAGCTC
>rnd-1_family-321#LINE/RTE-BovB ( RepeatScout Family Size = 232, Final Multiple Alignment Size = 98, Localized to 1000 out of 1011 contigs )
AAGAGGGGCGTACGACAAGGATGTGTACTGTCACCTGATTTGTTTTCAAT
ATACAGTGAATATATAATGAGATCTTTAATTGATATGCCCGGAATCGTGG
TTGGTGGGCACAATATAAACAATTTACGTTATGCTGATGACACAGTCTTG
ATAGCAACAAGTCAGAAAGAACTACAGGAAATGATAGACATTGTGGTGTT
AGAAAGTGGAAGAATGGGCCTCAGTTTGAATAATGGGAAGACAGAAGTAA
TGGTGGTATCAAAGAA
>rnd-1_family-462#LINE/Penelope ( RepeatScout Family Size = 97, Final Multiple Alignment Size = 97, Localized to 1000 out of 1011 contigs )
ATGCAGCGTCTGCAGGACCGACTNAAAACAGCAGTCGGCCAAACATTCTN
TGCNGCTGTTCCAGTAGTGAGGTACAAGACCACTCCNATCCCAACCCCAC
CTGTTAAAGAACCAGTGTCTCCGTACGCCAAATCNAATTGTATTTACCAA
TTTACATGTAAGTGCCAGTTGACTTACGTCGGTCGAACGGAGAGACAGCT
TGGAAATAGAGTGGCAGAGCACATACCCAAATGGCTACATACACAGCTGA
GTGATTCTTCNAGGGTGTCGAGACCAGTCAAGAGGAAAGAACCCANTTCT
TCNATAGGACGTCATCTGCTTGATTCCGGACACGTAATTGACAAGGACAG
TGCTTTCCGTGTNATTTACCACACACCGAACAGGCGACTGCTGAGANTGG
CCGAAGCTTTAACAATAAAAATNAACAACCCCCTCCTTTGTAAGCAGACG
GAATTTATNGTAAATTTGAAGTTACCCTGGTAAGTCACG
>rnd-1_family-422#LINE/I ( RepeatScout Family Size = 124, Final Multiple Alignment Size = 97, Localized to 1000 out of 1011 contigs )
ACACACCAGAAGGAAACTGAGGTTCATATTCCCATGCAAAGAATAAAAGA
AGTACGAAACCAGACCAAGACTCTTCTAGCAGACTCTAGCACAAAAACAA
CCGAGGCCTGCATGTCAGAAAAGTTTACTATGCAAGAGCTGGAAGTTGGA
ATTGGAGAGCTGAAAATGAAGAAAGCNCCAGGGGCTGACGGNATNACAAA
CGAANTGCTCNNNCACCTTGGACCNGCTGCCAAGAAGTTTCTNCTCCGGA
TTTTCAACNANAGCTGGGAAAAAGGNNTAGTNCCTCAAGCCTGGAGGGAA
GCCATCACNAACCTATCCTTAAAAAAGGAAAGACAGAAGAGACCCAGAAA
GCTACAGACCGATCAGCCTCACNAGCTGCNTNGGAAAACTAATGGAAAGA
TTAGTAAACANNAGACTNANATGGTTCCTGGAAAGTGAAAACGTCTTNAC
GCCGCAGCAGGCAGGNTTCAGACAGCGCAGCNNCACAGAAGACCAGNCGA
CNTACCTNNCACAAGAAATNGAGGATGCCTTCCAGGAAAAGAAGNAAGTN
CTNGCGGTNTNGNTNGACCTNAAGNAAGCCTTTGACAAAGTCTGGAAAGA
AGGNCTNCTGCTGAAACTGCTACAGGCAGGAGTNGAACGCAACATGTACA
ANTGGATCAAAGACTTTCTTNTACAACAGNAGAGCCAGAGTCAGANTTGA
TGGACACAGAGCAAACTGGCAAAACTTAGAGAAGGNGTCCCNCAGGGCGG
TGTTNTGTCNCCNACNCTNTTCCTNGTTTACATCAACGACCTCACAGCAA
CCCGCCACCAGCACGTTCANAATGCCCTGTATGCCGATGACCTGGCACTN
TGGTGCACCGATGAACACGCGACNACAGCCNCANACTGCTACAAAAAGCC
GCGGGAAATGCAGAGGCNTGGGCCGANAAATGGCGTGTCGGCATNAACAA
GACAAAAACGCAGCACCACTTTTCTCTCTCTCCCCCAAAAAAAGAAAAAG
TCGAAATTTGGATTAAAAACCAGCTCATTCCACAGACTGACACNCCCACN
TACCTNGGAGTNACATTTGATNNNAGACTAACATGGAGAANACATATAGA
AACAGTACAGGGAAAAGCATTCAGGAAGCTAGCAGTTATGAGAAAACTAG
CGGGTACCACATGGGGNGCNAACGGNAAAATCCTNAAACAAGTATACACT
GGAGCGGTCAGGCCAGTCATGGAATATGGNTCAACTGCATGGGCTNCAGC
AGCCAAGACAACAATGGGAAAACTGGACAAAGTGCAAAATNNAGGACTNA
GAATCGTTACCGGAGCCATGAAANCCACACCCATCAGAGAGATGGAGAAG
ATAGCAGATACTGAACCACTCGAACTCAGAAGACAATACAAAACTCTTTT
ACAGTATGAGAAATTAAAAAGACTTCAAAGTCACCCACTGCATTTTAAAT
TTCAAGAGAGAACAAAAAACAGACTGAAGCGTCAGAGCCCCAACCACCTT
GCTAGAGAACTGTACAGACAGCACCAAGATCTGCTTGAAAGAGATGTTGC
ACTGTGCGAAAAACTTAGGCCAGAACCATGGACAAGCAAGCCAGAGAAGG
CAAATGTAGTCCTAAAGGTACCAGGGATCACTTCAAAAGATGCCCAGACG
GAGACACAACAGAGAACCCTGGCTCTTGCTATGCTTGATGAGAAGTATCC
AAACACCACTTGGACTCAGGTTTTCACCGACGGCTCTGCTACAGATGCAG
TCAGAAAGGGGG
>rnd-1_family-157#Unknown ( RepeatScout Family Size = 704, Final Multiple Alignment Size = 97, Localized to 1000 out of 1011 contigs )
TCCCCATCTTCAGCAGCCAGCGAAGAGTTCCNATACTGATGGTACCNGTC
GCNATCTGGTTAANTGCCCGTCTTGCCTTTCC
>rnd-1_family-463#Unknown ( RepeatScout Family Size = 97, Final Multiple Alignment Size = 97, Localized to 1000 out of 1011 contigs )
TTTTCGTTCTCCCTGCCAGTGGTTTTCAGATGAGAAGGCCACAGGCCTCT
ATGAAGNCTGTGGTGCGACGCATGTCTTCCACTGATCCATAC
>rnd-1_family-464#LINE/RTE-BovB ( RepeatScout Family Size = 97, Final Multiple Alignment Size = 97, Localized to 1000 out of 1011 contigs )
CAACAGCCGCGATGTCCCAGCTGAATACGNTGTGGAAGAGCACAAATCAG
CATCGCAGTAAGGTCAGATATTTACAGATCACTGGCATCGTCTATTTTCT
TATACGGNTGTGAGAGTTGGACTCTCACTGCGGAAACGGAAAGGAGGATT
CAGGCTTTCGAATGTAAATGCTACAGACGNATTTTACGAATTAGTTATTT
AGAACACAAAACTAATAAATATGTCAGAGACAAAATATACA
>rnd-1_family-435#LINE/I ( RepeatScout Family Size = 117, Final Multiple Alignment Size = 97, Localized to 1000 out of 1011 contigs )
TGCGGCAGTGTTGGACTTAGAAGATGCNTACAACAGAGTNCCATACGACT
ATTTAATGCAATTACTGCTTAAACTAGAAGTCAATCCNNNNCTGGTCAAC
TGGATCGCNGCGGTCCTGTTCCAGAGAANGGTTGCNCTNCGATGTGGTAG
CTGGNCCTCNGAACCGCGAACGATATGTCCAGGNCTGCCACAGGGATCAC
CGCTATCGCCNGTGCTCTTCAACGTGTATACGGCGATGATCACTGAGCAG
CAGTTGAATGGAAAGGGAAGGACATTGNCATTTGCNGATGATATTCTTGT
TTATCGACGAGGGCGTGATAGACAGGAGATCGCCAGCACAATGCA
>rnd-1_family-415#LINE/RTE-BovB ( RepeatScout Family Size = 130, Final Multiple Alignment Size = 97, Localized to 1000 out of 1011 contigs )
ACTGCCCAAAAAAGGTGATCTACAGGANTGCGANAACTGNAGAGGAATTA
CGCTGCTNTCAGTNCCNGGNAAAATATTNAGTAGAATTATTNTGGAAAGA
TTAAAAGATGCTATTGATAAAATGCTAAGAGANGAACAGGCAGGTTTTCG
GTCAAACAGATCCTGTACTGANCAGATNGCCACATTACGTATTATAATAG
AGCAAAGCATTGAACTGAACTCACCACTTTACATTGGATTTGTGGACTNT
GAAAAAGCNTTTGACAGCGTCGATAGGGAATCTCTCTGGAAATTGATGGG
GCACTATGGAATCCCACAGAAAATTATCAACTTAGTAAAGGC
>rnd-1_family-465#Unknown ( RepeatScout Family Size = 97, Final Multiple Alignment Size = 97, Localized to 1000 out of 1011 contigs )
TGCAGACGATACTAGCAGACGATANTAGCGACCGTTGACAATTTCGAGAC
ATTACAGACGATAATAGCGACATGGCGGGGAGACCACGCGCTCCGACGCA
GATTAGCGATACTGTGTTCTTCCGATTGGAGGATTTAGCAGCGGTAGATG
TCAGACTTGTCGGCATGCGCNAAACGCGATTAAACTCACCGCCGA
>rnd-1_family-237#Unknown ( RepeatScout Family Size = 401, Final Multiple Alignment Size = 96, Localized to 1000 out of 1011 contigs )
TCATTACGGTCTGAGGAGAATGGCGCTGCGAGGAGTTACCAGGGGATCTG
G
>rnd-1_family-466#RC/Helitron ( RepeatScout Family Size = 96, Final Multiple Alignment Size = 96, Localized to 1000 out of 1011 contigs )
CGACAAGCGATTGGCCCATCTACACCTAAAACACGCAAGAGAAGGGCATT
AATTGCTTCAGAAACAGACGAGCAACGTGAGGTAAGACTGGAAACCATTC
GAGTGCGCACTGCTGAAGCCCGTTCATCTCAATCAGACCAGCAACGGAAA
GCAAGACTAGAAAACGTTCGAGTGCGCACTGCTGAAGCCAGATCGTCTCA
GTCAGACGAGCAACGAGAAGCAAGACTGGAAACCAATAGAGTACGCACTG
CTCAAGTCCGTTTATCAGAAACAGTCGAGCAACGGAAAGCAAGACTGGAA
ACCGTTCGAATGCGCACTACTTTATCCAGGCGAACACTGCATGTTGATTT
GAATCTTGGTGCATTCCATTACAACAGCAATTATGATTACAGTCTTCATC
CACAGGCGCTTATTGGCAAAATGGATAAATTGTGCGTACATTGCAGTGCC
TTCAAATTTAAGAATGACACGCCGGGTATGTGCTGCGCTGGTGGAAAAGT
TAAATTGCCAGTATTACATTCACCACCCGAACCATTATCATCATTGGTAG
CAGGTGACACAGGCCAGTCGACACATTTCTTGGCAAACATAAGTACATTT
GCAAATATGTCAACAAAGGAGGCGATATGGCAGTCTTTGGAGTGGGACAT
GCAGCTGCATCTATCGATGAAATCAAGCAATATCAGCTGGGGCGCTACAT
TAGTAGCAATGAAGCGGTATGGCGCATTTTGTCATTTCCAATTCATGAAC
GACATCCAGCAGTTGTTCATTTGGCAGTGCACCTTGACAATGGACAGCGC
GTGTACTTCACTACAGAAAATGCACATGCACGAGCATTGTTACCACCGCC
AACCACGTTAACTGATTTTTCTCATTGTGTAGAGATGATATGTTTGCAAA
GACACTACTTTACTCTGACCTGCCAACATACTACACGTGGAATGCATCAG
CTAAAAAGTTTCAACGTTGCAAGCAAGGTCAAGCGGTTGACGGACATCCT
AATTTATATTCTACTGATGTTTTAGGCCGTCTGTACACTGTTCATCCCAA
AAATGCAGATTGCTTTTACTTGCGATTACTTTTAATCAACAAACGGGGAC
CGACATCCTTCCAGGACTTGAGAACAGTTTATGGTAAAGTATGCGCTACT
TACCGTGAAGCTTGCCAAGAATTAAATCTTCTTGAAAATGATGCACATTG
GGACACTTCACTCGCTGATGCTTCGAATACTGCT
>rnd-1_family-20#Unknown ( RepeatScout Family Size = 3858, Final Multiple Alignment Size = 96, Localized to 1000 out of 1011 contigs )
TCGTCCTTTTTAGGACGNAATTTTTTGTTATTTGAAGCCCCACTCTGGCT
TTTGCCAGGGGCCGCAATATAGGCAGGCCATAAATATGGCCAANTGTCTG
AACGCGGTTTCTGGGACCTCTCCACGGCGATCCTCATCCGCATGGTGGCA
CTTTGTGTCATCGGGTGTTTATCGCTTGTGTGATGTCCTGGTGGGGTAGA
AAGTCAGTCAGTCCATTTAGATTTCTATTTATTCTCAAACATTTGTTTCT
CATTTCAGTATGTATTCCTTACGTCCTTTTTGGGATGCAATTTTTCGTTA
TTTGAAGCCCCACCCTGGCTCTTGCCAGGGGCCGCAATATAGCCCGGCCA
TAAATATGGCCTAATGGCTGAACGCGGTTTCTGGGACCTCTCCACGGTGA
TCCTCATCCGCATGGTGGCACTTTGTGTCATCGGGTGTTTATCGCTTGTG
TGATGTCCTGGTGGGGTAGAAAG
>rnd-1_family-467#Unknown ( RepeatScout Family Size = 96, Final Multiple Alignment Size = 96, Localized to 1000 out of 1011 contigs )
AGACTCACGACAACACAACCTCCCACAAACATTATATACGNCGAGCGAAC
GCCGAACGAAGCCATATCATAACACCCCCGCAACATAGGACAGGCCGTGC
GACCCGNCGNGGCATGAATGGGAAGGGAAGNNACTCT
>rnd-1_family-343#LINE/RTE-BovB ( RepeatScout Family Size = 198, Final Multiple Alignment Size = 96, Localized to 1000 out of 1011 contigs )
AGATNAGAGAAATGTCTGGACAACCACTNGTATCGACAGTTATAAGACAA
AGAAGATGGCGNTATATTGGGCACATCCTGAGAAGAAACGAGCAGAGAAT
CACNAAACAGGCACTGAAATGGGAAACAAAGGACTGAGGAAACGAGGACG
TCCAAGAGAAACNCTAAGANGAACGTTGATGAGAGAGGCCAAAGATGCTG
GACTGGATTCCAT
>rnd-1_family-469#Unknown ( RepeatScout Family Size = 95, Final Multiple Alignment Size = 95, Localized to 1000 out of 1011 contigs )
ACCTGGGAACTTTCCANCAATCGCCAAACCAGAATCACGACCGTAAAATT
TACCTTTACGTCGACCTGTGTTGTTTGCCGGCAGGCTGCGATTAATGACG
GGAATTCCACAGGCTCGAAGTATAAGTATCAATCTATTGTCCAAATTAAA
CTCCTCCCTTTNCTTAGTTTCTACCCAACCCTCAAGANGATGACTTAAGC
CNCGCCTCTGAGGTACCTATCAGATCAAATTAGCTAACAAGTGGCCTGTC
ACTCACAGTGAACGGCCTACAGTACGACCTTGACCAAGATCAAACATTCC
TAATTGCCAAACACCTGTTCTCCCGAGAATTACACTGACGTGTGAAACTC
CAGACCTCTGGNCGCCACNATGTCTAGAGTCCACTCAATTCCCCTGTTCA
AAAGGGCCCGCTCAGTCTGTGTCAGGAGATAACATTCTGACACTGGCGTG
AGAATCGAATTCCTACACCCCTAGTCTCATCAAAAGTCTGTTCAAAGCAG
TCTGGTCAGGAGATAACATTCATGACACTGGCGTGAGAAAGGAATTCTCT
AGCTACGGTGTAATTAGGTAATATTACCCAAGGCTNGGTCGCTTTGTCTG
GACTA
>rnd-1_family-335#Unknown ( RepeatScout Family Size = 209, Final Multiple Alignment Size = 95, Localized to 1000 out of 1011 contigs )
GGGGGAAATCGTGGCTAGGTCGGGCAGAAGATGTTATTAGGCAAATATGC
AGCCTAACCGACATCATACCTGGTGCAGAATGGATACCTGTGCCTCAGGC
GTTTATTTGTACATTTTCCTGTATTGTCACACTCGACAGGCGATGTAGAG
AAGAGAATCCTGTTGCTGTTAATGCAGAGGTCAACGCTCTCATCGGTGAA
AATTCAGACGAAGCAGATGCAATAATCTACACAGACGGATCCGTTATACG
CCAAAGAAGAAGCGCATGGGCATTTACAGCACGC
>rnd-1_family-172#LINE/Tad1 ( RepeatScout Family Size = 638, Final Multiple Alignment Size = 94, Localized to 1000 out of 1011 contigs )
AAAGGGCGACAGACTGAAGAGGGGGAAATCGTGGCTAGGTCGGGCAGAAG
ATGTTATTAGGCAAATATGCAGCCTAACCGACATCGTACCTGGTGCGGAA
TGGATACCTGTGCCTCAGGCGTTTATTTGTACATTTTCCTGTATTGTCAC
ACTCAACAGGCGATGTAGAGAAGAGAATCCTGTTGCTGTTAATGCAGAGG
TCAACGCTCTCATCGGTGAAAATTCAGACGAAGCAGATGCAATAATCTAT
ACAGACGGATCCGTTATNCGCCAAAGAAGAAGCGCATGGGCATTTACGGC
ACGCTCAGCGGGCAGAACAGTCAAAGAAGCCAACGGCGCCTTCTCCGTGA
CNACNAGCAGCATGACNATGGAGGTGATGGCAGTGACNNAAGCGNTNGCN
TGGCTNGAGACACAGAANTNCACCCGCGCGTGCNTNCTCAGTGACTCAAT
GAGTATGNTCNGGAGGATAGAGACGGGCTCGGTNCGAAGACAGTGGCTTG
AATCATTACAGAAGTCCACTGTTCGNGGAGTCACCTTTATTTTTGTNCCG
GGACACGCAGGCGTCGATGGAAATGAGCGAGCTGACAGGTTGGCTGGATC
CGCTATCACTACCGACGGTCAGCCTATGGACCATGCTGATATTATCAATG
C
>rnd-1_family-418#LINE/I ( RepeatScout Family Size = 128, Final Multiple Alignment Size = 93, Localized to 1000 out of 1011 contigs )
GACGATGGTGTGCGTGTGACAACAGACAAGGAGAAAGGGGAGGCTTTTCT
CCATAGGTTTATAGCTCAGACAGATCATAATGATGTAGACATCAGGGATG
CAGTTAGAAAGGAGTTAGCTGGCACCTTGAAGAATATGCATTATGAAGAC
ATGATACAAGTGGAAGATATCAAACAAATTTTGAAAAAAAGCAAAAGACA
CTGCNCCAGGGCCTGACGGCGTCAGATACGGCCACATGAAGGCTTTGAGC
GATGTAGACCTGGCGGAGATGGCCGACTGNTTTAACCAGAGCATCAAGAC
GGCATCAGTACCGGAGGACTGGNTGCACAGCTATCTGATCCCACTACCAA
AGCCTNGNAAAGATCATTCNAAGCTCAGCGGCTNCAGAATCATCACCCTA
CAAAACACTTTTGGNAAGGTCTTGGAGAAGATNGTCGCTGTAAAGCTACA
AGAATTTTTGGAAAGGGGGAAGCTTCTCCCAANAGGTCTGGGAAGTTACN
GGCCAGGAAAGGACACATGGTCNAATGCNGCCGCTTTTGCCTNCGACGTN
TACGAGGGNTTCCAGAACAGACAGGAAACGGTTGCGGCAGCGCTNGACCT
NGAGGATGCNTACAACAGAGTNCCATACGACATCTTAATGACTGCACTGA
NGGAGAAGGAGGTCAATCCATGGCTGGTCAACTGGATCGCAGC
>rnd-1_family-471#Unknown ( RepeatScout Family Size = 92, Final Multiple Alignment Size = 92, Localized to 1000 out of 1011 contigs )
CACGGCCAGCTCCAGNTATAAGGCCGTACAGGTCAAACGGGAATTCCCGT
TCTTGTGCAAGAATTGAGTCCCTCTGCGTTCACAGTTTTTATCGAGTAGA
TTTATACACAAATTAAACTA
>rnd-1_family-472#Unknown ( RepeatScout Family Size = 92, Final Multiple Alignment Size = 92, Localized to 1000 out of 1011 contigs )
TAACGAAACAAATGCTCTAACAGGGTCTCAGCGATATGTTANTTGCGGAC
CTGTTTCTTATTGTTTCTGATTACCTGACAATTCTAAGAGACG
>rnd-1_family-473#DNA/hAT-Charlie ( RepeatScout Family Size = 92, Final Multiple Alignment Size = 92, Localized to 1000 out of 1011 contigs )
AAACAAAACAGCGCTGCCAGCTTGATGTGGAGAGTGATCTCCGTTGTGCC
TTGTCCAACATCAGACCAAAAATAGCAGATATCATCAAGACAAAACAGTG
TCAACCATCACATTGATATTTGGACACTAAATTACCAGTTGTTGGTGATT
GTTT
>rnd-1_family-468#LINE/RTE-BovB ( RepeatScout Family Size = 96, Final Multiple Alignment Size = 92, Localized to 1000 out of 1011 contigs )
AAAAAGCNTTTGACAGCGTCGATAGGGAATCTCTCTGGAAATTGATGGGG
CACTATGGAATCCCACAGAAAATTATCAACTTAGTAAAGGCAACATATAA
AGACATGAAATGTCGAGTTCTTCATGAGGGAAAGCTAACAGATGCATTTG
AAGTAAAAACAGGTGTGNGACAGGGATGTNTTNTGTCGCCTCTCCTATTT
TTACTGGCTATNGACTGGACTATGAANACAGTAAC
>rnd-1_family-474#Unknown ( RepeatScout Family Size = 91, Final Multiple Alignment Size = 91, Localized to 1000 out of 1011 contigs )
TCGATGGGTAGCAACGTTAAGATCATCATCATCAGTTTCCACTTCTGCCG
TTAAGCGCCGTGAAATAATAATTGAGGCCATCATCATCAGTTTCCACTTC
TGCGCAATGTTTAAAGTTAAG
>rnd-1_family-475#RC/Helitron ( RepeatScout Family Size = 91, Final Multiple Alignment Size = 91, Localized to 1000 out of 1011 contigs )
AAATACAAGTGTGGACCACTTCTTAAATCCCGCAATGATAAATGTATACA
CATTATCTGTTGGCTTTTTCATATTGTCTTATATACCGCCTTTTCTTACT
ATTTGCTGCCCAGTTTCTATGCATTTCCTCTTGAGTCAAAATAGATTGTT
ATCTCATGCTCATATTTTCATTTATTTCAGCGATACTTCAAGTCACATTT
CATTCAGTGCGTGAGGACGAACAAGCTACTGACGATCAGCGCTCACAAAA
TTTGCAGTTATGCCTCCCAAACGACAAGCGATTGGCCCATCTACACCTAA
AACACGCAAGAGAAGGGCATTAATTGCTTCAGAAACAGACGAGCAACGNG
AAGCAAGACTGGAAACCGTTCGAGTGCGCACTGCTGAAGCCCGTTCGTCT
CAATCAGACCAGCAACGGAAAGCAAGACTGGAAAACGTTCGAGTGCGCAC
TGCTTTATCCAGGCGAACACTGCATGTTGATTTGAATCTTGGTGCATTCC
ATTACANCAGCAATTATGATTACAGTCTTCATCCACANNCGCTTATTGGC
AAAATGGATAAATTGTGCGTACATTGCAGTGCCTTCAAATTTAAGAATGA
CACGCCGGGTATGTGCTGCGCTGGTGGAAAAGTTAAATTGCCAGTATTAC
ATTCACCACCCGAACCATTATCATCATTGGTAGCAGGTGACACAGGCCAG
TCGACACATTTCTTGGCAAACATAAGTACATTTGCAAATATGTCAACAAA
GGAGGCGATATGGCAGTCTTTGGAGTGGGACATGCAGCTGCATCTATCGA
TGAAATCAAGCAATATCAGCTGGGGCGCTACATTAGTAGCAATGAAGCGG
TATGGCGCATTTTGTCATTTCCAATTCATGAACGACATCCAGCAGTTGTT
CATTTGGCAGTGCACCTTGACAATGGACAGCGCGTGTACTTCACTACAGA
AAATGCACATGCACGAGCATTGTTACCACCGCCAACCACGTTAACTGATT
TTTCTCATTGTGTAGAGATGATATGTTTGCAAAGACACTACTTTACTCTG
ACCTGCCAACATACTACACGTGGAATGCATCAGCTAAAAAGTTTCAACGT
TGCAAGCAAGGTCAAGCGGTTGACGGACATCCTAATTTATATTCTACTGA
TGTTTTAGGCCGTCTGTACACTGTTCATCCCAAAAATGCAGATTGCTTTT
ACTTGCGATTACTTTTAATCAACAAACGGGGACCGACATCCTTCCAGGAC
TTGAGAACAGTTTATGGTAAAGTATGCGCTACTTACCGTGAAGCTTGCCA
AGAATTAAATCTTCTTGAAAATGATGCACATTGGGACACTTCACTCGCTG
ATGCTTCGAATACTGCTCGACCA
>rnd-1_family-458#LINE/RTE-BovB ( RepeatScout Family Size = 102, Final Multiple Alignment Size = 91, Localized to 1000 out of 1011 contigs )
TGTGACAGTTATGATCCGCTCAAAATTGGTGGCAACCCTATTCCGGAACT
CCGCTACGCAGATGACACAGTCCTCCTTTCGAACAGCGTAAAGGGAATAG
AAAATTTAATATTGTCCGTCCAAAAGCACAGCGAAGATCAAAATCTGTT
>rnd-1_family-391#LINE/RTE-BovB ( RepeatScout Family Size = 152, Final Multiple Alignment Size = 91, Localized to 1000 out of 1011 contigs )
AGAGCAAAAATCAACCACTGTNCGTTGCTTTTATTGATCTTACCAAGGCA
TTTGATTTGGTTAGTCGAAAAGGTCTGTTCAACGCGCTGAAGAAGATTGG
GTGTCCACCTACNCTACTGAGCATTATCGAGTCGTTCCACGCGGGTATGA
AAGGTACAATCAACTTTGATGGTGTAACATCGGAGGAGTTTGTAATCAAA
AATGGAGTGAAGCAGGGGTGTGTACTTGCTCCTACCCTCTTTGGAATATA
CTTTTCACTTCTTTTGANACGTGCCTTTCGAGATCAGGAGGGTGGTATAT
TCATTCTCGATCTGACGGCAGCCTTTACAATGCTCGCAGGCTGAAGGCCA
AAACCAGGATAAGAAAGGTACTTATCAGAGAGCTGCTGTTTGCAGATGAT
GCNGCAATAACCGCCCACTCAGAGGAGGAGCTGCAATGTTTACTATCTGC
CTTTGCTGATGCGTGCTGTGAATTTGGACTAACAGTCAGCAAAAAGAAGA
CAAAGGTTATGGTGCAAGGTGTTAATGACAGACCTACAGTCTACATTGAC
GGCGAAGAGCTGAGACAGTAGACCATTTTACCTATCTGGGTTCCACAGTG
AATAGCAAACTATCGCTGGACCAAGAAATCAACATCAGGATAGGTAAGGC
AGCAACAACAATGAGCAGATTGACAAAGAGAGTTTGGGAGAACAGAAAGC
TCACGATTAAAACAAAAACCCTTGTCTATCAGGCTTGTGTTCTCAGCACT
CTGCTTTACGGCAGTGAAACTTGGTCAACCTATTTGCACCAGGAGAGACG
GCTNAATAGCTTTCACATGCGATGCCTAAGAAGAATACTTGGCATTAAGT
GGCAGGACAANATCACAAACACTGAGGTACTGGAAAGAGCAGGTACTACA
ACAGTCTTTTCNATGCTCAGTCTACGAAGGCTCAGGTGGCTGGGTCACGC
CTGGAGAATGGAGGATGGCAGAGTCCCNAAGGACATCCTNTATGGTGAAT
TAAAGACGGGNAGAAGACGTCGAGGCCGACCTCTACTACGNTATAAAGAT
GTGTGCAAGCGGGACATGAATGATACCGGCATTGAGGCGGACNCATGGGA
ACAAAAT
>rnd-1_family-476#DNA/TcMar-Mariner ( RepeatScout Family Size = 90, Final Multiple Alignment Size = 90, Localized to 1000 out of 1011 contigs )
TCATAATGACAGTTTAAAGATGGCCGCCCCCACTTTTGACATGCACCAAA
GAGGAGCA
>rnd-1_family-470#Unknown ( RepeatScout Family Size = 93, Final Multiple Alignment Size = 90, Localized to 1000 out of 1011 contigs )
TGAGATCTGGCGGATGACCCCGCTGCGACTGAGCTTTATCGT
>rnd-1_family-377#Unknown ( RepeatScout Family Size = 163, Final Multiple Alignment Size = 89, Localized to 1000 out of 1011 contigs )
AAATGTACTTCCCAGATATTTAAACTCNTNCGCCTGTTTAATGCCTTTGT
ACTCTATTGCAACGTTTAGATCTGTCTTCTTTTTTCCTGATCGTCATNAC
TTCTGTCTTTTCNGTGTTGATCCTCATATTATTTGTTTTACANCCGTCGT
TCGTGGATGTTAGATGTTCTTGCAGTTCATGGCTGTTCTGCTATCAATGC
CTGGTCATCGGCAAAGAGTAATTCGTT
>rnd-1_family-477#DNA/hAT-Tip100 ( RepeatScout Family Size = 89, Final Multiple Alignment Size = 89, Localized to 1000 out of 1011 contigs )
TTTCATTCCTGTGAGTGGTTGTCGTAGGGGCCCCAGCACACTGGTTTGCC
CAGGGGCCCATAATGCTGTTAAGACGGCTCTG
>rnd-1_family-478#LINE/I ( RepeatScout Family Size = 88, Final Multiple Alignment Size = 88, Localized to 1000 out of 1011 contigs )
CCGGGTAGATGGAACCCGTTAGCTTTGGACAGCAGTCCATCTAGGAGNCG
GCAAACTCCGAATTAAACCCCCAAGTTCAAGGTGNCTCCTNCGTGCCGAG
GAACTGNATGGCCGTTGGGTGAGCTAGTCGTNAACGNNGGACGTCTGGCG
GGCGTGCGGGGCGGCGCCNGGCGTATGGACTCCTACGGGACGTCCNNNGC
CCCTTCCCCAGCAGGCGGGCANTACTAGGGTGACCGTTTATTTCCTGCAG
TACTCTATTTTTTCGTATGGATTTTGATTTAAAAATATACATAAGAATCG
TCGCCGGAGCTACGGAGCGCGTGCTCTGCGCTTGACACCNTCTTCAGCAG
NTAGCGAAGAGAGAGTGAGGAGGAGANGACGAGGAAATGGGGAGAGAAGA
AGGCATAGAAATAGGA
>rnd-1_family-479#Unknown ( RepeatScout Family Size = 88, Final Multiple Alignment Size = 88, Localized to 1000 out of 1011 contigs )
AAATTAAGAAGAGTTTGGAGGCAACNGAGATGTGGTTCCTGAGACGAATG
TT
>rnd-1_family-481#DNA/hAT-Blackjack ( RepeatScout Family Size = 87, Final Multiple Alignment Size = 87, Localized to 1000 out of 1011 contigs )
AAACGGATCGTGACTTCGATAAACCAAGGCCCTCTGTAATTTATGTTAAT
CTACTAGAATAAATGCGGGATATAAAACCAAAACCCACCACTGATACCAA
GTGATTCAGACTGTTCAGAAACTACTTGAGGACAGAAAATAGAGAGGATA
TAGACCTAGTTCTATCTGTGATAGATTTTATTACTTTTACCAATGGCCAC
GTCATCCAAAAAATGGAAAGCATCTTATGACATCGCAAGTATAATAGTAA
CTGGAAGAAAACATACCCACGGCTCAAAAGATCTTCAGACGGATCAGAGG
CAGCATATTGTAAACTGTGTCAGTGCACTGTTGCACCAAGAATTAGTAGC
ATATCAAATCATGAAAAATCCGAAAAACACAGGATGAAAACTCCGTCAAA
AAGCCAGTCACAGCTTATTACAACAATGACTCCTAGGCAAAGTAATGATA
AAGTTAAAGGCAGCAGAGTTGCAACTTGCTGTAGGCATGACCTGCCATTG
TGCAATACGCACAATTGATCATCTAAGTGAAATCATGAGAGCGCATGGTC
GGGGGAGTACATTGGAGCACATACAGTTGCATAGAACTAAATGTTCATGC
CTAATAAAAAATATTATATCGCCTGCACTTAAGGATGACCTTATTGATGA
TTTTCGGAACAAGAAATATGCCATCATTATAGATGAGTTGCAAAGACTTC
ATCCCATCTGAGAAAATGCTTAAAGATTTTACATCCGAAAAGGTTTACGC
TGTATCTTCCACTGGTTCCAGTGAGGATGACAGTGAAGAATTCAATCTAG
AGCTTTTGATGTGAAGTGAGTACAATGTTACACTTTATTTGGCATTTTCT
GGCATATTTTGGGTAATGGTTTGGCATAAAATGAAGTTTTTTTT
>rnd-1_family-480#LINE/RTE-BovB ( RepeatScout Family Size = 88, Final Multiple Alignment Size = 87, Localized to 1000 out of 1011 contigs )
AGATCAGATATTCATTTTACGGCAAATAGCAAAATTGGGAATACGGAAGA
GATGTACATAATGTTTTTGTGGACTTTGAGAAAGCNTNTGACAGCGTNCA
TAGAGACGGTCTATGGAAAATGCTACGAAGNACTNTGGAATNCCAAAGAA
GTTAGTCANCATGACCGAACTATGTATGGAAGACACTTGTAATATAGTAA
TATATAAAGGCAGAAAGTCAGACCCTTTTCAAATAACATCTGGTTTAAAG
CAAGGTGATGCTCTGTCCCCACTTCTTTTCAACTTGGCCCTGGAGAAAAT
TATAAGGAAATTGAAACAAGAGTGTACTATAGGAGAAACTACAAGAATAC
TTGGTTATGCAGATGACATTGATATCGTTGGAGAAAATGAACTAGAGACT
GT
>rnd-1_family-482#DNA/hAT-Charlie ( RepeatScout Family Size = 86, Final Multiple Alignment Size = 86, Localized to 1000 out of 1011 contigs )
TATGCCAGGGGTGCCGCGGCAATAATCAAGAATTTTTCAAAATCTGCTTG
AGATCAGCGAAGACAGCAGTTTAAAACAGAAATACCGCGAAGGAAGCCAA
GAAGAGTTCTGGATGCAGGTGTATTCAGAAAACAATGCTATTGGCAAGGC
TGCAGTGCATTCTCAACGTACGCTTACATTAAAAAAAAAAA
>rnd-1_family-483#Unknown ( RepeatScout Family Size = 85, Final Multiple Alignment Size = 85, Localized to 1000 out of 1011 contigs )
TAAACTAGGCACACTAACTACAAGTCCTAANCTGAATCAAAAACAACTGG
AACTATAATTATCACATTNAACATCTGTTTATTTTACTGAACACAAAATC
AGCGTGCTTCACAAATAACAATACATAACAACAACCAACGTGCTCGACCA

>rnd-1_family-484#Unknown ( RepeatScout Family Size = 85, Final Multiple Alignment Size = 85, Localized to 1000 out of 1011 contigs )
CTGTGAATAATTTCATGAAGAATACGTTCCCAGTTGAAGTGACACAGTCA
GTGAGAGCTCGAGTGATGAGGAGAATCTTGAAAATTATAGATTTAAAACT
AGATCGATAGTAAGAGAAGGGGGCGTGTCCCTCAAACAGCAACATCTGGT
GCTCACTTTGTGAAACAAGGCTGATCCTGCTGGGTGGATTGGCACACAAA
GGTGGAATATTGGCGCTAGATGAAAGGTAAACCTATTTTCTACAATGTCT
CCAAGTTTCATCTTATTCTAGCCACTTGTTTGCATGTAACTAATATTTTT
GTATATCATGTTGGTTTTTTCGCGTTAATGCCCAGGGCCTCAGGTTATAG
GGACAGTTAGGTTCAGGGCCTCAGGTCTGGTAGGG
>rnd-1_family-485#Unknown ( RepeatScout Family Size = 84, Final Multiple Alignment Size = 84, Localized to 1000 out of 1011 contigs )
CCCATTTGAAAACTAGTGAAAAACTTGTCAGTCCCAGCAAAATCTTGAAG
CTTGCA
>rnd-1_family-486#Unknown ( RepeatScout Family Size = 84, Final Multiple Alignment Size = 84, Localized to 1000 out of 1011 contigs )
CTTCGACAGGAAAGTGAAGTAGGTCTAGGCTTTTCACAGTCCAACAGGTG
ATCGATACTTTGGTTNATTCAGACTCTGAGATAATTTCATGAAGAATACG
TTCCCAGTTGAAGTGACACAGTCAGTGAGAGCTCGAGTGATGAGGAGAAT
CTTGAAAATTATAGATTTAAAACTAGATCGATAGTAAGAGAAGGGGGCGT
GTCCCTCAAACAGCAACATCTGGTGCTCACTTTGTGAAACAAGGCTGATC
CTGCTGGGTGGATTGGCACACAAAGGTGGAATATTGGCGCTAGATGAAAG
GTAAACCTATTTTCTACAATGTCTCCAAGTTTCATCTTATTCTAGCCACT
TGTTTGCATGTAACTAATATTTTTGTATATCATGTTGGTTTTTTCGCGTT
AGTGTCCAGGGCCTCAGGTTATAGGGACAGTTAGGTTCAGGGCCTCAGGT
CTGGTAGGG
>rnd-1_family-487#LINE/Penelope ( RepeatScout Family Size = 84, Final Multiple Alignment Size = 84, Localized to 1000 out of 1011 contigs )
CGTCTGCTTACAAAGGAGGGGGTTGTTGATTTTTATTGTTAAAGCTTCGG
CCANTCTCAGCAGTCGCCTGTTCGGTGTGTGGTAAATNACACGGAAAGCA
CTGTCCTTGTCAATTACGTGTCCGGAATCAAGCAGATGACGTCCTATNGA
AGAANCGGGTTCTTTCCTCTTGACTGGTCTCGACACCCTNGAAGAATCAC
TCAGCTGTGTATGTAGCCATTTGGGTATGTGCTCTGCCACTCTATTTCCA
AGCTGTCTCTCCGTTCGACCGACGTAAGTCAACTGGCACTTACATGTAAA
TTGGTAAATACAATTNGATTTGGCGTACGGAGACACTGGTTCTTTAACAG
GTGGGGTTGGGATNGGAGTGGTCTTGTACCTCACNACTGGAACAGCNGCG
NAGAANGTTTGGCCGACTGCTGTTTTNAGTCGGTCCTGCAGACGCTGCAT
GACGTCATCNCCTCGANAAGTTAGNTGGATANANACTCGTAGTTTGGGNA
CTGTAATTTCGTTCGGGGTAGGGTTGGGTGGGGTG
>rnd-1_family-488#Unknown ( RepeatScout Family Size = 83, Final Multiple Alignment Size = 83, Localized to 1000 out of 1011 contigs )
GTGTAAGCGTTAGCAGGTAACGATTACACTGGAGAGGGTATCACGTGATA
TTTTCCTCCTCGTCGCTTCGCTGTTGAGAGTATGCGTGCGCAGCTAGCAT
CGTAGTACTAGTAACTGGTAGCTTTCACACGTTACAGTTTCTGCATGAGT
GGCGTAAGCAT
>rnd-1_family-489#Unknown ( RepeatScout Family Size = 82, Final Multiple Alignment Size = 82, Localized to 1000 out of 1011 contigs )
CCCTACCAGACCTGAGGCCCTGAACCTAACTGTCCCTATAACCTGAGGCC
CTGGACACTAACGCGAAAAAACCAACATGATATACAAAAATATTAGTTAC
ATGCAAACAAGTGGCTAGAATAAGATGAAACTTGGAGACATTGTAGAAAA
TAGGTTTACCTTTCATCTAGCGCCAATATTCCACCTTTGTGTGCCAATCC
ACCCAGCAGGATCAGCCTTGTTTCACAAAGTGAGCACCAGATGTTGCTGT
TTGAGGGACACGCCCCCTTCTCTTACTATCGATCTAGTTTTAAATCTATA
ATTTTCAAGATTCTCCTCATCACTCGAGCTCTCACTGACTGTGTCACTTC
AACTGGGAACGTATTCTTCATGAA
>rnd-1_family-490#Unknown ( RepeatScout Family Size = 82, Final Multiple Alignment Size = 82, Localized to 1000 out of 1011 contigs )
AGGCGTGATCAGTTCGCACGTGTAAGCGTTAGCAGGTAACGATTACACTG
GAGAGGGTATCACGTGATATTTTCCTCCTCGTCGCTTCGCTGTTGAGAGT
ATGCGTGCGCAGCTAGCATCGTA
>rnd-1_family-491#Unknown ( RepeatScout Family Size = 81, Final Multiple Alignment Size = 81, Localized to 1000 out of 1011 contigs )
TACGAGGGGAAGTCAATAAGTAAGTCACAAATGGTTATGGGATGGCAGGA
AAATGTAGTTGGTGGTTTCTAAA
>rnd-1_family-492#Unknown ( RepeatScout Family Size = 81, Final Multiple Alignment Size = 81, Localized to 1000 out of 1011 contigs )
TAAGTTGATTATAGTTTACGAGTACCATAANATGATGTCTNTTTAAAGTT
GGCCACTGCTGCAGAGAGGNCAGNNTCGGCTGTGTGATCGCACAGAGTTC
GACCGTTCTTGATGTCCAGAGANNCGGATCCGAACNTAGACCTTCCCCTG
TACAGACTAAATAGCTTGTGCCCTACATAACCCACACCATTTGTAAANAT
ATTAAACCCTACAAGTAATTATTCTCTAACCAGACAAACGGAGTTTGTGC
CGACTAGCGGANACATNGAATCTGGGTCATCCTTCAGCGGCTAGACGCTG
TGACGTCAGAGCTAGGCGCTCTGAGTCAAAGGTNTTTTTGGCACAACAAC
ATGGGTGTGTAGTGGGCAGACTGTGGAGGTATGAAATATATATA
>rnd-1_family-493#Unknown ( RepeatScout Family Size = 81, Final Multiple Alignment Size = 81, Localized to 1000 out of 1011 contigs )
TGTGTAGCACAGCTNTCTTCTTTGTGCGTACGTTGATGTCACACCCAGGT
TCGTCTTTAGGTTTGCTACAGGAGGAGTCGATTGGAAGANTATAGACGAG
GAGAAAGATGGTCGTGTCGATAGTGGCGATGATGATGATGTCTTGCTTGC
TGCATGCTTGCATACAAAATGTCTGGAAACAACTGTTCTCGTCTGTACTG
TCTTTATTGTGATACCTCAGCAATGTCACAAATAACATCAATGATATTCT
GAATAGCGCTGTCTGGTACTAACGGCTTGATCGTCGACTCTAACATCTCA
ATAGTTTCTACCTAATGTGTCTCTGTTAACCATGGATCCATGTATCTTGT
GTGTCGTCTCTGTAGCTCGATGTCTCGTTTCATGTCTCCTCTCTAGTGAC
TGTCTTCGAGGCTCCATGTGACTGGTTCCTCTNCTTCTAGTGTTGAGCTG
GCATCTGAGGGTCAATGNGACTAGTCCCTCNTCTTCTGAGTCTCGACGAC
TGAAGGCTTCTAGTGTTGGGCTTACATCTCTACNACTGAAGGCTGCCTTG
AGGGTCCATGTGACTGGTCCCTCCTCTCTCTCGAGTCTCGTGGACTGAAG
AATCTTT
>rnd-1_family-395#Unknown ( RepeatScout Family Size = 146, Final Multiple Alignment Size = 80, Localized to 1000 out of 1011 contigs )
ATGCGGTATATGCTTGGGCTGNCGACGGTTGCAGGTAGGCTGNNANTGGT
GCAAGCAAAGTCATATCTCAGAGTAGCTGCGGACAAGAGGCACCTCCTGC
ATGAAGCCCTGGGTAGAGCTAAGGGTCACCGGCTGAAAAGAGGGAGGTCA
TGGATGGCNCAGGCNGAAGACACAATCGGACAGGTTTGCANCCTTGAGAA
CATTAGGCGAGGAGAGGAGTGGGTCAAAGTGCCACCTGAGCAGTCAGACT
TGTGTAGGGTCATAATCACGCTGGGCCGGGAATGCAGAGACTGGCCAGCN
GGTGCCGCAGAGNCGGAAGTTCAGCAANTGATTCAAGATAATGCTCGCCC
AGANGATNTGATCGTTTACACAGACGGTTCNGTGTCAAGAGGCAAAAGAA
GTGCTTGGGGCTTCTTAGCAAAAGTTAATGGTCGACGTTTGGTGCAGGAG
AGCCTAGCATATGATACCACAACGTCCAGCTTAAGAAT
>rnd-1_family-495#Unknown ( RepeatScout Family Size = 80, Final Multiple Alignment Size = 80, Localized to 1000 out of 1011 contigs )
CACCATTCTCTCCACACTGTAATGAATGATCTGTTCACACTCCCCACTGC
A
>rnd-1_family-496#Unknown ( RepeatScout Family Size = 80, Final Multiple Alignment Size = 80, Localized to 1000 out of 1011 contigs )
CGTGGGGAGGAATAGTTTTCGATCCATCGGAGCGCAGTTTTCGATCCACT
GAAGCGNCGTGGGGAGGAATAGTTTTCGATCCATCG
>rnd-1_family-497#Unknown ( RepeatScout Family Size = 79, Final Multiple Alignment Size = 79, Localized to 1000 out of 1011 contigs )
AGGGGAAGTCAATAAGTAAGTCACAAATGGTTATGGGATGGCAGGAAAAT
GTAGTTGGTGGTTTCTAAAGGTGTCATTAGGTGACAGCAACATCGAACTT
TATCTAAAGGTGTCGTTAGGTGACAGCAACATCGAACTTTATGTCTCCGT
TCGTTAGGTGGCGCTAGGTGTTGCATGCGCATTCGCAACACAGAAACAAA
ATGGCGACTGTACTTACGGAGTGTACCCTCAAAGAACAACGTGCTGTTGT

>rnd-1_family-498#Unknown ( RepeatScout Family Size = 79, Final Multiple Alignment Size = 79, Localized to 1000 out of 1011 contigs )
AAACTGGACTTATCCCAGTTCTNTCGTCGATGCTCCCCTCAGCTCCTGGT
GATTCGACTGTCTTTGACTCTGGTAATTCTGCTTCGACTGGATCAGGTGG
TGGAAGAGTACCTCACCATAGAGGACACAGCAACTGCACNGGNACCCAGC
AAGTCTCTCCCACCGGTCAGGTCACAACACTGTCTCTGAGCCACACCAAG
CTCCTGAAGACTGGTTCNCTGGATTGATGACACAGTGTCTGCAATTGTCC
ACCTGTCCCGGAGCTCACACACAAGCTCTGGCACTGNCAGGTGTTTGAGG
TATATGGCACCCAATANTGAGATGTCAGGAACTTCACAGGTGTTAGCTGG
TGGGTAGTTGGTTGATAGTTGGTTGGTTGATGGTTGGTGGNTGTTGGTTG
GACTGTGANTCTTCTGCCAGCTCTTCACGGAGGTTTCATCC
>rnd-1_family-499#Unknown ( RepeatScout Family Size = 79, Final Multiple Alignment Size = 79, Localized to 1000 out of 1011 contigs )
CACACACGCACGCGCATACATACATATCATACACACCTTATTTAATNATA
AATTGATAATGCAATATGGATTATTAACTACATTTAAGGTGGCATATAAT
CNGTGGTAAGCATGATATTCAAAAAGTTTNCGATTGNATGNATAGGGACT
NTTGGTATTTTTNAGNTCNAGTGGAAGATGGTTCCACAGATGAGCTGCGG
AGTACGCCAAACTTGTTTTGTATAGGTCTATT
>rnd-1_family-494#LINE/I ( RepeatScout Family Size = 80, Final Multiple Alignment Size = 79, Localized to 1000 out of 1011 contigs )
GGAAAAGCTGGCAGGAAAAAACAAAGTCTCTAAACCTTGAAAAAGACGGC
AAGAAAGCTCTGGAGACTAGTCAAACGACTCAATGANGAGAATTTCTCCT
AGACAAACAATCACGCTGAGTAAAGATGGNGACAAAATCTTCACAGGAAA
ACAGGCTGCAGATTCGTTTGCCAGAACATACAGTGTTGANAGCAACCTGA
CCCTTAATGAGGNCCAGAGAAANAACGAGAGACTCAAGAAAACAAACAAA
TAAGAGACAGACAGATACAACTCCTGCCTCTATGAGGGAGCCATTTACAC
CAGGGCGAACTAGAGNANGCCATNTCGAAGCTGAAANTNAGAAAGTCNCC
AGGNCCAGATGAAATCANCAACGAAATGCTCANCAACCTGGGNCCAGCTG
CCAAAACAAAGCTGCTACAGATCTTTAATCATCGCTGGGCCAGTGGCAAA
GTTCCNCAGGTATGGAGAGAAGCAATCACGATACCCCATCCTTAAACCAG
GAAAGGACAGTTCNAATGCCTCCAGCTACAGACCGATCAGCCTCACNAGC
TGTCTNNGNAAAACGATGGAAAGNATTGTNAACNNNAGACTACAATGGTN
CCTGGAAAGTGAAAACATCTTCACGCCGCAGCAGGCAGGNTTTAGACAGT
GCNACTCCACAGAAGACCAGACGACNTACCTNNCACAAGAAATNGAGGAT
GCCTTCCAGGAAAAGAAGCANGTNCTNGCGGTNTGGGTNGACCTGAAGAA
AGCCTTTGACAAAGTCTGGAAAGAAGGNCTNNTGANGAAACTGAGAGACT
GCAGGGTGAATGGGAACATGTACAANTGGATCAAAGCATACTTGCATAAC
AGAAGAGCCNGAGTACAGATAGATGGNCTCAAGAGCAAAAAAGTTTTACT
GCGACAAGGNGTCCCNCAAGGCGGTGTCCTGTCNCCAACNCTNTTCCTNG
TTTATATCAACGACCTGGTTCTGAAATACCCNATGGAGTTAAAGCTGCNA
TGTATGCCGACGACCTGGCACTCTG
>rnd-1_family-500#Unknown ( RepeatScout Family Size = 79, Final Multiple Alignment Size = 79, Localized to 1000 out of 1011 contigs )
TTACTCAGTTAACTGTAAGCATGCTGATTGTTTGCTTTGAATCGGTGTCT
GTTTTTT
>rnd-1_family-501#DNA/TcMar-Mariner ( RepeatScout Family Size = 79, Final Multiple Alignment Size = 79, Localized to 1000 out of 1011 contigs )
TCCTTCATGACAATGCCAGACCACATACGGCTCGGTTAACTCAGGAGAAA
ATTAACCATCTAGGGTGGGAACTTCTGGAACATCCACCTTACAGCCCCGA
CTTAGCCCCTAGCGATTTCCACCTTTTTGGTCCACTGAAAACCCACCTTG
GCGGGAGACATTTCGCGAATGACGCAGAAGTTGAATGTGAAGTGAAAATG
TGGTTTAGAAAACAGAGCACGCAGTTCTATGCAGCAGGTTTGGGAGGACT
GATAAAACGATGGGACAAGTGCATCAATGTTGGTGGAAATTATGTTGAAA
AATAAAGGGACAGTGTATGTGTAA
>rnd-1_family-502#Unknown ( RepeatScout Family Size = 78, Final Multiple Alignment Size = 78, Localized to 1000 out of 1011 contigs )
ATTTGTTAATTAGGTCACGTCAACTGACATTGGCACATTTATATGATCTT
TATGTTCGCCTTGCCGGGACGCACAATATGATATGTNTTAAGCCAGGCTC
GCTGGCAGACAACCGTAAATGTATAAGGTTTTTGCTGAAAAATAAGTCAG
CCGGCGGCCATTTTCATATGTTAATTAGGCGCATATCGTAGTGTATGTAT
TTGAGACATGCATANACGGTTAGGTCTCACTGTCCCGATTCCAGCGATAT
ATGGTTGCTAAGGGATTCGTTCAGAAACAAAANAGTTATGGCCGTAAAAT
GCAAACATTGAGTCATTTCATCTCACTGGGTCGCAGCCGGAATCCATGTT
TTGTCGATTTCCACTATAATTTTTCTGTGGTGGTGTCCGCCACNAAAACG
TNAATATCTCNGCTTAGAANCGACNTACAGGCTTAAATGAGGTACCGTTG
GATTTGTAATTTTAATCTCTATCTAGCTGTNATGGTTTCGTAAGTAAAAA
CCCAAAATATAAAACTTCACTAGCATCCCTA
>rnd-1_family-504#Unknown ( RepeatScout Family Size = 78, Final Multiple Alignment Size = 78, Localized to 1000 out of 1011 contigs )
TTCTACATCACCTTTCACAGGGTGTTAAACCCCAAGGACTCTTAGCCGAT
ATGATAGTGGTGAGATGATTGTCAGCTTTGAGATATTTACTACATAGAAA
ATTGGATTTAACCAATATTTCTACATCACCTTTCACAGGGTGTTAAACCC
CAAGGACTCTTAGCCGATATGATAGTGGTGAGATATATTTATCATAGTGC
TTCCGGTTTCCCAAAAGCCTCTATAACACCTTTCACAGGGTAATTACCCA
ACCCCAAGGAATCTACCACGAAAAAAATGCATAGTTGAGATATATTTTTC
ATAGACTTAGAGTTTCCCCAAAGTCTATAATCACCTTTCACAGGGTANTT
AACCCCAAGGAATCCNAGATGAAACGATGACTATTGGGATGTATTTTTAA
TAGAGCTTAGGGTTTCCCCACCCAAGTCTCTACATCACCTTTAACAGAGT
ATTCAACCCCAAGGAATCCCACACACCTTTCCCCCTTTAGATGGACACAG
ATGAGTTCAACTCCTCTACTGTGCTTGTGCTTTGATGTGTGCACTCTTTC
TTTACCATCAGTATGTCTATTCAGCATCAGTATAACTATAGCAGTTCCTA
ATCTTGGGTGTGGTGGACAACTTTACCATGTCCCTGTGCTGTGCACCTAT
GCTAAAACATTTCAAATTGAATTTTTTATCTAAGTCATTCTGTGGAAAAA
GATTTTATTATGATCTATCGCTAAATCTTGATCTAATTCTTCTGTGCTGT
TCCTGGGGAGAGAGAATTTTTTTTT
>rnd-1_family-503#LINE/I ( RepeatScout Family Size = 78, Final Multiple Alignment Size = 77, Localized to 1000 out of 1011 contigs )
TTTAATGCCAGCTGGATTTTTAGTATAGTTCCTCAAGCNTGGAGGGAAGC
AATCNCGATACCCATCCTTAAACAAGGAAAGGACAGNACAGACGCCTCCA
GCTACAGACCGATCAGCCTCACNAGCTGTCTNNGNAAAACGATGGAAAGN
ATTGTNAACNNNAGACTANANTGGTNCCTGGAAAGTGAAAACGTCTTCAC
GCCGCAGCAGGCAGGNTTTAGACAGTGCNACTCCACAGAAGACCAGACGA
CNTACCTNNCACAAGAAATNGAGGATGCCTTCCAGGAAAAGAAGCANGTN
CTNGCGGTNTGGGTNGACCTGAAGAAAGCCTTTGACAAAGTCTGGAAAGA
AGGNCTNNTGANGAAACTGAGAGACTGCAGGGTGAATGGGAACATGTACA
ANTGGATCAAAGCATACTTNCATAACAGAAGAGCCNGAGTACAGATAGAT
GGNCTCAAGAGCAAAAAAGTTTTACTGCGACAAGGNGTCCCNCAAGGCGG
TGTCCTGTCNCCAACNCTNTTCCTNGTTTATATCAACGACCTGGTTCTGA
AATACCCNATGGAGTTAAAGCTGCNATGTATGCCGACGACCTGGCACTCT
G
>rnd-1_family-505#Unknown ( RepeatScout Family Size = 77, Final Multiple Alignment Size = 77, Localized to 1000 out of 1011 contigs )
TGAGTTACACACTAGTCAGCACACTACCAAGTGTCTAGCAGGTACNCTTC
CGCTTCCTCTCTTAGAAACAGAACTCGACGACGATGGCNCCGTCATACAT
TTTATTCAACAGGATACATGACACAAATGCAGAGACGTAGNCATTGATCC
CAGTTGACATTCGCACATAGTCCATTTGTCCTCACTCTCTCTCTCTCTCT
CTCTCTCTCTCTCTCTCTCTCTCTCTCTCTCTCAACTTGTAGCGACCTCT
CCTTGACCACTACAGCTCCAAGGNCTACAGCGTCCCACAACTCTGGGCTC
GCCGTACAGCTGAACAGGACGAATTCTCCTATCCACTGGACCTTGATATT
ACTTCAGCAGACAACACGGCTGACTGGAGACGGACTTCCCTTGCCGTTCT
CCGAAAGCACACAGCACGTCAGCCTGTCGAAGGGCTCCGATGACCGACAG
GACTTCTANCACAAGTCCCCTCTAGCACACAGCTCTCGTCGGCATCCCCN
CTGTTCTGTTTCCGTAGTGATCCTACGTCTCCCTGCGTCGCCACCCAGAA
CAGNTACTACTGGAGCNTCCCGTCCCCTGGACTTACTTCGCCAGCGGGAC
TATACCTTCGACCAGTACCGCAACCNCGACACTTACTCAGACCTNAATGC
CTGATAGTCGTACGGTACTCTTGTCTGTTAGACTCGCGAGAGATATCACG
GACCCTGACTCGGTCTCTCTCTCTCTCTCTCTCTCTCTCTCTCTCTCTCT

>rnd-1_family-506#DNA/P ( RepeatScout Family Size = 77, Final Multiple Alignment Size = 77, Localized to 1000 out of 1011 contigs )
TGAAATATATGTTAAATCTGCAATTACTTACTCTGGGGGCAAAATATTTG
GCAATGCAGACAATGCAAAAGAAGCAGCAACAACAGTGCAGGCTTTCCTC
ATNTCTTCAGTTTTTGGAAGCTACCAGGAAGTTATAGAACTTTCACCTGT
GAACAGAATGACATCTCAGGATCTACGTTTGAAATTACTCCACTGTATCC
ACTTTGTACAGGAGTGTGGTTTCACAGTAGTTGCTGTAATTGCAGATAAT
AGTGCCGTCAATCGCAGAGTTTACAGTGATCTCCTGAAACCAAGCCAAAC
NTTTATTGAGAACCCAGATTTTTGCTGATAAAAAAATATTTTTACTGCAT
GATTCTGTGCACTTGCTAAAATGCATNTGGAGGAACTGGATCAACCAGAA
GGACACAGACCAGACATTTACTTATCCTTTAATAACTGGACAAATGCTAA
ACGCCTGTGATACTGATAGAGCTGCAGAAGCTAACTTTTTCTCATTTAAA
GAAACTGTATTATAGTGAGCAAAAGAATATTGCAAAACTGGCACCTAAAC
TTTCCCACAAAGCCATCTATCCCTCCAGCATGGACAGACAGAACGTTCCT
CTTGCTTTGGCAATTTTTAGTGAATACAACGTTGCTGCTCTGCGTCTAGT
AGGCAGTAATGAAACAGCAGATTTTATTGAGGCCATCCTTAGATGGTGGC
ATATTGTTAATGTGAAAAGTAAATTTGTAGGTAAAAAAGACACTGAACTC
ATTCTCAAATCCTGTATTGTCAAATGATGATGAACAAGTGCATTATCTTG
AACAGTTTGCTGAATGGCTAAGAAAGTGGGACAAGCTGACTGGCTGTCAA
GGAAAACTGACCAAGGAAACACACAGTGCACTGCTGCATACAGTGACCGC
AGTGCTTTCTCTAATCAAATATCTATTTGCAACCACAGAAGCCAGTTTTA
TACTTTTNGGGAAAATACAAACAGGTAATTTAGAAGCCATATCTGGAGAA
TATCGACAGTTGTCAGGTGCAAACTATCTTGTGTCTGTGCAGCAAGTTTT
AGAAGCAGAAAAGAAACTNAAAGTTTACTCACTGTTAAGTATGTCCTCAT
CAACTTATGGAGATTTTCCTATCCGTGACCTCTCAGAGTTTCTTAGCAGC
AANGAAGATGAAACTGGGGATGACATAATTACTGATGCTGTTCAGCTGGA
CGTGAACAAGGTTTTTTTTCAAATAAACCCAAATGACTGTGAATTGTTGG
TTTCGGAAGGTTCAGAGGAGTCACTGGTGTATATTGCTGGATTTGTCTCT
AGTAAGCTGAACAAAAAAATTAGGTGTGCTGCCTGCAAGACTTTACTGCA
GATGGACAGGCCATTANCANATGATGTTGACTCAGGTGCAATGTCNACAG
ACTATATACAGCTGCTTGACCGTGGAGGTTTGAAATACCCTTCAAAGTTT
ATAAGTTTANTAACNTTTGTAACATATGCAGCTATGCAGAAGCTTATATC
AGCTGAGTTGGAAACANAATTTCTAGCCTGCAAACATCACAAAAAATTGC
TTATGCATATTGTTTCATGCAGTTTACACACATATTTCAATGATGAAATA
GGTGGTGTCTGTGGTGAGGGTTGTTCTAAAGTAAACATTGCTTCCAAAGC
GCTGCCATCTCTGGCAAATGTTTTTCTAAATAACTATAGAAAAGTCCAAA
ACGATACATCCTTGCTGGATAAATCATCCAAGAAAAGAAAACTGGCTAAG
TTCACTCACTAATGATTTCACGGATTATGTGACTACAATTTGGACAGCTA
AAATGTAAGTAGTTTCTGTTGTGCTTTCTGTTTCTATGTCATGTTGTGAA
TATGTAAGTAGTTTCTGTTGTG
>rnd-1_family-507#Unknown ( RepeatScout Family Size = 77, Final Multiple Alignment Size = 77, Localized to 1000 out of 1011 contigs )
AAAAAAGAAACGCATAGCTACTGAAAGGAACAAACATACTCACAATTTTG
ACATTCNGAATCTTTGTAATTCAATAAGTGAAATTGTTCAAATTGCACAC
AAGAATACCTTAGGGTTCAACCAATCAATTGACATCTTTT
>rnd-1_family-508#Unknown ( RepeatScout Family Size = 77, Final Multiple Alignment Size = 77, Localized to 1000 out of 1011 contigs )
GGTACAAGTAACGNTTTCCGGCCCAGGCACACCGTGATTGGCCGTTCATT
CATGCTTNCTGACCTTTCACACGCGCTAGTCTATGTTACAGGGGTGTCAG
GTTGTATTGTCTT
>rnd-1_family-511#Unknown ( RepeatScout Family Size = 76, Final Multiple Alignment Size = 76, Localized to 1000 out of 1011 contigs )
AGAGTACATGAATCATCATNGTGAATCANAGGTAGCCGTGNAAANAGAGC
ATGTATGTCATCTCAGATGTCACTTATCCAATCTGGTAGGTCACTGCTCC
CCTCAGTCCATGGTGATTCGAACCGGCTGACTCAATAGGTNGCTNTNCCT
CTGGTTGATCTGGTANACACTGATCGTCTCACATGTGAGGACACAGGAAC
TGCACTGGAGCCCAACAAAGCTCCTGAAGAAGGNTTCCTTGGATTGATGA
CACAGGTGGCCTGCAATACTGTCTCTCAGCCACTGGAACTCACACACAAG
CTCCTGCCATGTTGAAGTTGTGGCAACAATAGGTAGGACTTTTGGGTAGG
TTTGGTGATAG
>rnd-1_family-512#LINE/L2 ( RepeatScout Family Size = 76, Final Multiple Alignment Size = 76, Localized to 1000 out of 1011 contigs )
TGGCTGCTCCAAATCTAATGTCAAACGACTGAGTTCTCTNCAAAATNGNG
CTTTACGCCTAGTTTCCGATAGAAANCACGTCGAGAAAAATCNTCTNTAT
AGACATCTAAGACTNCTGCCATTTAGTAAACGTTTANTTTTCAATAAGGC
CAAATTTATTCACAAAATCTTATCTNAAAATGCTCCANATTACCTTGGCC
GGTTTATTCAATCTAATCCTAAGAATAGCAAGCGNCTAAACNTATTACAT
NTCCCTAAACCTAGAATAGACCTATATAAAACAAGTTTGGCGTACTCTGC
NGCTCATCTGTGGAACCATCTTCCACCCGATCTGAAAAATA
>rnd-1_family-513#LINE/I ( RepeatScout Family Size = 76, Final Multiple Alignment Size = 76, Localized to 1000 out of 1011 contigs )
GGGGTCCNAATGGAGCAATGATGCGCAATACAAGACTCTTAATGTCTATT
AGCCTCTCTTGCTCAAGCCTACCTCACCTTCACGTGGTGGACCCTGTTCT
TCCCAGCAATCCAGTGGAAGGTTGGGGTCTCAACCCCCAGCGGGAAACTG
GATGGGACAACAAACGAGGTAAAGGCGAAAGACGAGGGATGAGCCTACTC
TCCTCGAGTATGACCACAGTCTACCCTAGCAAAACAAGGTGCTGAAGTCG
GAGGCAACCAGCCAGGAGGCGCACCACAGCAATCAGGATGCCACGCACAC
ACGCCATGGAAATATGTCTANATCAGCAAAACGTTATGGTGCTCGCCCTG
TGATGGACTCCGCCAGGCAGGNGCAGTGCCGGGCCCTNNGCCTCGAAGAG
GCCCACCCCAAGCTACTGGAGGTCCTCCTCGAACGTCCTGTGGAGCCAGG
GGACGNGAGAATAGAGCANCTGGCCGAACTAAGAAAAGAGTCAAATTAAT
GCACTGGAATGCAGAGGGGGTCACAAGCAAAAAGCTGGAGCTGGAAAACA
TCCTANATGAAGAGCAGATCGATGTATGCTGCATNCAAGAGACCCACCTC
ACTGAAGACACAGTCTTTAAAATCAGAGGCTACCAGTGCTTCCGATCTGA
CCGGAAAGGCAGGAGAAAAGGNGGAGTACTNACCCTTGTGAAGAACAATA
TCNCTGCGTGCCAGACTGAAGTATATATGGATGGAGCNGAGTACCAGATC
CTGNAGCTAAGACAAACTGGAAATGCAGACTTCCACCTGATCAATTATTA
CTGTCCGAGCGATCGCCCCCAGGCATTAGACACAGTNCCAGTAGAAGAAA
AGACGATTCTATGTGGAGACTTTAACAGCCACTC
>rnd-1_family-514#Unknown ( RepeatScout Family Size = 75, Final Multiple Alignment Size = 75, Localized to 1000 out of 1011 contigs )
TTCCTTGTGGCAGGACGAGCTTCCAAACCACTGCCAGGCTGGTCGTAGCT
AATGATTGGAGTGCCCTAAGGAAGATCTTGGTGCTTGGGACAGATCCGAC
ATTCCACCTCAGTCTTTGAAATGGATGATCCTCTGGGAAACTCCAGGTGG
TAATTGTTGTATGTTATTTCCCACTGATCCTCTCATGACGACAGTTTCAT
GTTACTATCATTTTTATCTTTCATCCTACTTAGTTTGAATAATGTATTTT
CAAAAGTAAATAGATGATTGAATTTTACTTTAATTTTAATAAACATTCCT
ATGATTGATTTAAACTCATAGTTAAAGTTTATTTCTATTTCTAGATGTAT
GTATGGTGTCAGTGCTGTCTACCAATATACATAGTCTAGATGGGGGCTTA
ATTTTANTACCAGAAAGGGAAATTGTCGGGAGGGGTCATCTGCCCTGTCT
AAGTGTTTAGACATCTAAANTCCCTTTCCCTCTCCTGTGGGTACCNAGTG
CAGCTAACNTTCTTTCGCGAGCCAATTCGAGTCTGTNTTCCTGGGTATCC
AGGGACACTGTCTGCTCTTTGCACCAAAAGACAGTTGTCTCGGTTTCTAA
CAAGATAACACCACTTTAGTGAGTGTAAAAGGAACCTGTTCCACGACAAG
TGNGGCGCTCTCCGGAATNANAACCTGAGGCCACACAAGTGGCGTCGCCG
CCNGCGATCTAAAACCCGGCAGACCCTAGACTAACGAAANNGAAGTTTNA
TTTCATAGATTTCATTTTAANTACTTCAAAAACTTTTCCAGTCCCTAGAC
TANAGGCACCATACTTTTAATAGTGACTTGCGTAACTGGGGTTTGAAGAN
TGGCANTATAATAACTGTANAAGTAANTGATNGATGAAATCATATGAGTT
AACTGTCTATCATTGAACACTTCATGAACNTTGATTAGTGTTTAATCTAT
AGCGCTTAGTNAGTAGTCTGATGAATTGATGATTTTTTTTTCCCAATCTT
GCCTGCTTTAGCATTTGATATNGATTGTAGANCATATTNCATGCTGACAT
CNTATCATTTGANATTACTGTTAAGTTTATTTAATGTGTCATTGATTGCT
GTGCAGTAATGTTTGATTACTTGCATTATTTTCAGTAACGTTCTCCTTAC
TGCTGTGGTCAGTTTTCCTTTTTTTCTATTCTATCACCCAACCCTTCAAC
TATAAATACTCTTCTGGTTAGTCCTGCATGTGATCAGTTTCTCTTGCTTT
GTAAATGAACAATCTAGACATTATGGACCGCCGGTCCAGGTTCTTAGAAA
ATGCAAGGATTTTTGGTGCACAAAGGGGCTATAGAGGACAAGAGTTAACA
ACGTTCATACAACGCGAACAGGAAGAATGGGACTCGATGCTTGCTCGTCA
TGCAGCGGAGAGGAAAGAAGAGTATGAAAGAGANATACGGCTTATAAGAG
AAGAATTAGAAGGAGATGNTAGAGTGTATTCAGGAAGGACTTGCCGAGAG
GATGCGGCTGTCAAAGAGTGAAGAANTTCNTCAAGAAAAGCTGCATAACT
ATCGACTACTTGAGAGGGCAGANAAAGATAGGANAGAACNGCAGGCAGAA
AACAGTTAGCGNTGAGGACAACATGCGGGTANNTGCGAGGGAAAACCGAC
AACTCCCAGGCTGANACTCNGGCAGGNATGGTCGGGGGCTCACTNTCTAA
CCANTGGAGAGGTGTGCACTCCTTGCGCCAAATGGTACCTCANCAGCTGA
GGAAGNAAACATAGACCANCCGGAGGACCGTGCCTCACNCCTCTTATTCC
TNACAGGAAAAGAGTGGACAAGAAGAANTCTTCNANAGGGATAACCAGAT
CTACATTGCTGGACCCCTTACTCTCCATTACTCAGATAAGCCTAAAATGA
GAAGCCTCCTGTCCCCACAAGGAAGCGAGGACAGAAAACAAAGAA
>rnd-1_family-515#Unknown ( RepeatScout Family Size = 75, Final Multiple Alignment Size = 75, Localized to 1000 out of 1011 contigs )
TGTATTTTTAAACAGTTACCAAAAAATTCGCAATGATAAGGAATTGATTT
CATCCAACAAGATGAAACTGGACAAATTTGTTTGTGCTGTTTGTACCTTG
AGGATACATATTTAGTAGTGCTATAAGTACTGTTAAGAAAACTACTCTGG
GTGAAAAAAGTATTGCACATATCAATTTCATACTGATTGTGCCTCTTTAC
TAATTGTTGACTAACAGTATAATTATATGTTGTAGNAGTACACTAATAAT
ANTAATAACCATCAACCATTTATATTTATGTTATGTATGACATGTGTATG
TTTCATAGCAGTATTTTTATGCGCTAAATTTGATAAAGTACAAATGTCAC
CCCCCCCCCCCCCCCCCCCCCCCC
>rnd-1_family-516#DNA/TcMar-Tigger ( RepeatScout Family Size = 74, Final Multiple Alignment Size = 74, Localized to 1000 out of 1011 contigs )
TACAGTAGAACCTCGCTTAACGAGCACCTCTCATAACGAGTAATTCGCAT
AACGAGCAAAACAAATTGTAAAAGAATGACTTGCTTAACGAGCGACGTTT
CGCATAACGAGTGGCGAGGAGAGGGGAAGTCCCGGATTGTGCGCATGTTA
CATCAGTCTGTGTTTAGCACTCGTTCCAGTAGCATCGTAGTGTCGCTTGT
GATCACACATTTTCTCAAACTTGTGTTATATTGTGATATATGTACATGAA
TCCTCCAGGCCTACAAGATGACCTCCCTGAAGAATTTAAGTTCATCAAGA
TCCAGTTTCTGCCTCCCAACACCACTCCGTTACTCCAGCCCATGGACCAG
CAAGTTATTTCTAACTTTAAGAAGCTCTACACTAAAGCACTCTTCGAGCA
TTGTTTTCAGGTGACTGAAGGGACCAACCTCACTCTCAAAGAGTTTTGGA
AAAATCACTTCCACATCGTTGCCTGCCTCAAGATGATCGACAAGGCGGGG
GAAGGGGTTACCAAGAGAACCCTAACTTCTGCTTGGAAGAAGCTTTGGCC
GGAGAGCGTTGTCGATTTGTGACTTTGAGGGGTTCGAGACAGTACCTGTG
GAACCTGTAGTCAACGAGATTGTGTCTTTGGCCACTATCATGGGATTGTA
GGTGGATAACAGTGATATCGAAGAGCTTGTGGAAGAGCACAGCCAAGAGC
TGACCACCGAAGAGCTTATGGAGTTGCATTGTGTTTCACAGCAAGAAGTT
TTGGAGGAAAGTTTGTCAGAGGAGGAGGAGGAGGTAACAGAAAAGCAACA
ATCTTCTGGCGAAATAAGAGAAATGCTGAAAGCATGGGAAACTGTTGCAT
CTTACATTGAGAAGCATCACCCTAATAAGGAAGTGGCTATGCGCGCTGCA
AATTTATTTAATGATAATGCTGTGTCGCATTTTCGCCAAATTTTGAAGCG
TCGGCAAAAACAAATGTCTCTGGACATCTTTCTAGTAAAAAAAAAAAAAA
TAATTAGCTATGTATCATAATTATTTCGACTTTTTTTTCTGCAAATCGAA
TTCGCATTCCAGGTGGGTTCGTTCCGCGTTTGAAGAAAAGATGAAGATGA
TTCACTCTCCTTAACAATATGTATATAATTTTCTTTGAATAAACGTTATA
CATAGCATTTTGTGAGTATTTTTTTCGACATGGAACGCATTATCGTATTT
TACATTAATTTATATGAGAAAAATTGTTTCGCATAACGAGTGTTTCGCTT
AACGAGTATGATTCTGGAACGAATTATGCTCGTTAAGCGAGGTTCCACTG
TA
>rnd-1_family-509#Unknown ( RepeatScout Family Size = 76, Final Multiple Alignment Size = 74, Localized to 1000 out of 1011 contigs )
TATTCCTGGGCACAACTTGGCCGGACNTCCCCACCACTTGNTAGCCCCCA
GGCTATGATAGNAT
>rnd-1_family-518#DNA/hAT-Blackjack ( RepeatScout Family Size = 74, Final Multiple Alignment Size = 74, Localized to 1000 out of 1011 contigs )
AAAGTAAAGTATGAGCAAAAAATTTGGAAAGAGTGGTTGCATGATGACAA
AATTAAAAACTGGGGATATGACCAAAGCTCGTTGTAAGTACTGCAAGTGT
GAAATTAAAGCGAAAATACAAAACTCAAAGAGTCATGCAGAGACTAAAAA
AGCATAAAACTGCAGTTTCATTTAAAGATATTACACCGCTGACATCTGTT
TTCAGAACTATACTGATAAATGAATCATCAAAAGTTGAAGTATCAGTCGC
AATGTTTTTAATTTGTCACTGCGCAATTTCAAACTGTGACCATTTGATCG
ATTTGTAAAAAAAATCTCGGACTAGTTCAATTTGAAAAGTGTGATGTAGA
AATGCATCGCAGCAAGTGTACACATATTATAAGAAATACTTTATTTTCTC
ACTTCGAAAAAGATTTGATCAGTGATATTTCTACAAATAAATATAGTTTA
TTATTAGACGAATCAAATGATATTTCGGTACTGAAAGTGCTTGGTGTGTG
TATTATATATTACAGCAACAATACAGACAAAGTAGTTTCTACATATCTTG
GACTAGTTCAATTTGAAAAGTGTGATGTAGAAAGTATAGTTTAGGAACTG
AAGGACCTTTTAATCAGCAAACAGTTAGGCTTGAAGAATTTGGCTGTAAT
TGGTACTGATAATGCCTCAGTGATGGTTGGTATAAACAATGGCGTTTATG
CCAAGTTGAAGGAAGCTAACCCATCGTTAATACTTATAAAATGTATGCGT
CATTCATTGCAGCTA
>rnd-1_family-519#Unknown ( RepeatScout Family Size = 74, Final Multiple Alignment Size = 74, Localized to 1000 out of 1011 contigs )
AAGTCTCTTGAGAATCGCTTTATTTACACTTTGGGNACTTTAACGCCCAG
CGGACTGAACTGCCAACACAGTTTCATCTAAACTCCTAGGGGACTGAACT
GCCCNCACAGTTTCATCTCANACCCCCAGTTACGGCCCCTGGTACTCCAC
AG
>rnd-1_family-520#LINE/RTE-BovB ( RepeatScout Family Size = 74, Final Multiple Alignment Size = 74, Localized to 1000 out of 1011 contigs )
TTCTGGTCTCAAGACTCAGTGAAGGGAAAACCCCAACTGCACCTCCACGC
GGTAGAGGACGGTAAACACACTGCGGTGTGGCCAACGCAGCTATGGGACC
GAGTATCCGCCGGGATAAGTGGACACCTCTGGGGTGCCCTCTGCTGTTAG
CAGGAGCATCACAGAGCAGGGCACTCACTTGCCCTGGCAATCGAAAAGGT
TGCTGAAGGCTGAGGACGTGGTCTAAAGCCATGTGGATGTGGAAAGCAAC
GGGAAACTACCACATTACTATCCCAAGAAACTCATCATGGAAGCCAAAA
>rnd-1_family-521#Unknown ( RepeatScout Family Size = 74, Final Multiple Alignment Size = 74, Localized to 1000 out of 1011 contigs )
TGTCACGAAACGACCTCAGTGGTTCCAGAAGTTAGTACTTGTAATAAGTT
CTTCTGGTTATAGAGAGACAGGATACTATGCCCTTNACCCAAATATTACT
TTAAACCGNATTGATTTAAATGTTTCCAGTCCTTAGTCCAGACAAAGCGA
CCGNGCCTTGNGTAATATTACCTAACTACACCGTGGCTAGGGAATTCGCT
TTCTCACGCCAGTGTCATGAATGTTATCTCCTGACCAGACTGCTTTGAAC
AGACTTTTGATGAGACTAGGGATGTAGGTTNGATTCTCACGCCAGTGTCA
GAATGTTATCTCCTGACCACAGACTGAGCGGGGCCCTTTTGAACAGGGGA
ATTGAGTGGACGCTAGACATNGTGGCGNCCAGAGGTCTGGAGTTTCACAC
GTCAGTGTAATTCTCGGGAGAACAGGTGTTTGGCAATTAGGAATGTTTGA
TCTTGGTCAAG
>rnd-1_family-517#Unknown ( RepeatScout Family Size = 74, Final Multiple Alignment Size = 73, Localized to 1000 out of 1011 contigs )
ATCTTGCNGACACTGCGGTTGCTATGGCTGGCCCAGTACTGGACAGAAGT
GATGTCATCAATGCCATGC
>rnd-1_family-522#LINE/I ( RepeatScout Family Size = 73, Final Multiple Alignment Size = 73, Localized to 1000 out of 1011 contigs )
ACTACCAACATGCAAAGGCCAAATTTNAAAGGGCNAAGCTGCAGGCTAGA
AGGAAAAGCTGGCAGGAAAAAACAAAGTCTCTAAACTTTGAAAAAGACGC
AAGAAAGCTNTGGAGGCTAGTCAAACGANTTAATGANGAGAGTACANGGA
GAAACGAAGATCACGCTGCGNAAAGATGGAGACATCCTCACAGGAAAACA
GGCAGCCGACCCTTTGCAGATTCNTTTGCCGAAGATAGCGACGTTGAAAT
CAGCCCGGAGAAACAGCGAGAAATTCAAGAAAACAAACAACATAGAAGAC
AGAAAGATATAACTCCNGAGGCGCTAGAGGCGCCANTTACACNTAGCGAA
CTAGAGTTGGCCATNTCGAAGCTGAAAATGNGAAAGTCNCCNGGNNCNGA
TGGAATCACCAACGAAATGATCAAGAACCTGGGNNCAACTGCCAAAACAA
AGCTGCTACAGATCTTTAATCATCGCTGGGCCAGTGGCAAAGTTCCTCAG
GTATGGAGAGAAGCAATCACGATACCCCTCTTAAACNAGGAAAGGACAGT
TCCGATGCCTCCAGCTACAGACCGATCAGCCTCACCAGCTGTCTCTGTAA
AACAATGGAACGCATTGTCAACCCTAGACTACAATGGTACNTGGAAAGTG
AAAACATCTTNACGCCGCAGCAGGCAGGNTTTAGACAGTGCNACTCCACA
GAAGACCAGACAACNTACCTNTCNCAAGAAATNGAGGATGCCTTCCAGGA
AAAGAAGCNGGTNCTCGCGGCATGGGTNGATCTGAAGAAAGCCTTTGACA
AGGTCTGGAAAGANGGNCTNTTGAAGAAACTGAGAGACTGCAAGGTGAAT
GGAAGNATGTACAANTGGATCAAAGCATACTTACATAACAGAAGAGCCCG
AGTACAG
>rnd-1_family-523#LINE/I-Jockey ( RepeatScout Family Size = 72, Final Multiple Alignment Size = 72, Localized to 1000 out of 1011 contigs )
GGGGTCCNAATGGAGCAATGATGCGCAATACAAGACTCTTAATGTCTATT
AGCCTCTCTTGCTCAAGCCTACCTCACCTTCACGTGGTGGACCCTGTTCT
TCCCAGCAATCCAGTGGAAGGTTGGGGTCTCAACCCCCAGCGGGAAACTG
GATGGGACAACAAACGAGGTAAAGGCGAAGGGATGAGCCTACTCTCCCTC
TCAAGAGATCCTGAAGTCGGAGATACCGGGCCAGAAGGCGGACCAAAAAC
CACGGTGCCACGCAACCCCACGCCATGGANATATGTCTANACCGTCAGAC
AAATTAACGTTGGTGCTCGCCCTGTGGGACTCCGCCAGGCAGGNGCAGTG
CCGGGTTCTGAGCCTCGACAGAGTCCACCCCAAGCTACTGGAGGNCCTCC
TAGACCGTCCTGTGGAGTCAGGGGACGGCGGAGGATAGCNACTGGCCGAA
ACCAGTTAGACAGAAAAGATCCCAAATTGCCTTTTGTCATAATGCACTGG
AATGCAGAGGGGGTCAAGTAAGCAGGCTGTACAGCAAAAAGCTGGAGCTG
GAAAACATCCTNNATGAAGAGCANATCCGTGTATGCTGCATCCAAGAGAC
CCACCTGCAGGCAGATCAGATCTTTAAAGTCAGAGGCTACCAGTGCTTCC
GATCNGACNGANAAGGCAGGCGAAAGGGNGGAGTACTNACCCTTGTGAAG
AAACAATATCCNTGCGTGCCAGACTGAAGTATCTTATATGGATGGAGCNG
AGTACCAGATCCTGCAGCTTAAGACAGACAAAGCGGANTTNNACCTNATC
AATTATTACTGTCCCAACGACAAATCGCTAGACCTCAGCACTGTGCCAGT
ACCAAANANCGACTTNATTGCGTCGGAGACTTCAACAGCCACTCACANAG
CTGGGGCTACGACCATATNGACNAGAGAGGAGAAGAGGTGGAGACGTGGC
AGGATGANAACAGNCTCGTCCTGATNAATGCCCCCTCAGATCCACCNACC
TTCTACTCNAGANCGTGGCANACAACNTCNACCCCAGACCTAGCCTTCNC
TACTCCAGATATATCTGGAATGATAAGTAGAGAGGTGGGAGACCAG
>rnd-1_family-524#Unknown ( RepeatScout Family Size = 72, Final Multiple Alignment Size = 72, Localized to 1000 out of 1011 contigs )
AAGTAGGGATGAAGATGCTATTAATCATTTGCTGTTTTGCTGGAAGGGAG
ACATTTGGGTGTCTAAGCAGTGGGGCTAACTGGTAG
>rnd-1_family-526#LINE/I-Jockey ( RepeatScout Family Size = 71, Final Multiple Alignment Size = 71, Localized to 1000 out of 1011 contigs )
GANAACCCCACATATCTNGGAGTAACATTTGACGAAAGACTNACNTGGAG
NAAACACATCGAAGACANCCAAAGGAAAGCCACACTGAGGCTCAGACTTA
TGAAGAAACTAGCTGGAACAAGATGGGGNGCAGACGNCAACACTGTACGA
CAAGTATACACGGATGCGTACGACCANANCTGGAGTATGGCATGGGAGCA
TGCTCCGCAGCAGCCAAATCAAATCTACANAAACTGGACAAAGTNCAGAA
CANTGCTCTCAGAATCATCACNGGAGGCATGAGAANCACACCAATCAATG
AGNTGGAGGCAACTTCTGGCCTCCAGAGCTTGAGCCTCGAAGGGGAGAAA
AGGTGCTTACCCTAACAGAAAAATTTAAACGCATGAACAACAACCCCATG
CACAGAATAGCAAA
>rnd-1_family-527#Unknown ( RepeatScout Family Size = 71, Final Multiple Alignment Size = 71, Localized to 1000 out of 1011 contigs )
GGCTCTCCTGGCAAATCCGGNCGGTAAGCTGGACGGCCTCGGNCGGCTTA
GTGGGAGTTCTCTCCCTTGGCCGCACTCNAAACAGCGAGCGGAAAAAGTC
ACGAANCAAACGACATACTTACCTATCATCATNCGGTTGCGTGTAGGGCT
GCGTACGGTTGCGTCTAGGGTTGCCTATCATCATACGGTTGCGTGTAGGG
CTGCGTAGGGTGTCTCATCATCATACGGTTGCGTGTAGGGTTGCGTAGGT
TGGTGAGGTGGTGTTTGCGTAAGAT
>rnd-1_family-528#Unknown ( RepeatScout Family Size = 71, Final Multiple Alignment Size = 71, Localized to 1000 out of 1011 contigs )
TTTTTTTTTTTTTTTAAATATATATCCTTATATAAAAGTGGTAAATGTTT
CGTTTCGTAACTATAAANTTTGTACNTTTTAACAATCTGGGTTTTTGTTT
TTGTTCTTTGTCTATGTATTGCTTGGGTTTTTGTTCAGCTNAGCTGGGTT
TTTCAAAAAAATCCCATTGGCAGCCCTG
>rnd-1_family-525#LINE/RTE-BovB ( RepeatScout Family Size = 71, Final Multiple Alignment Size = 70, Localized to 1000 out of 1011 contigs )
CCTNTCTCAGAGNGTCACCATCGACGACGAGGTAAACGCNAGGATCTCNA
AGGCCAGCGNCGCTTCGGCAGACTNTACACNAATGTCTGGAACAGAAGTG
GCATCACCCTGCAGACNAAGCTNAAGGTATACAGAGCTGTAGTGCTTCCA
GTACTGCTGTACGCNTGCGAAACNTGGACTGTATACCAGCGCCAGGCTAG
AAAGTTAAACCACTTTCACACAGTCTGCCTNAGAAAGCTACTGAANATCA
AATGGCAAGACAAGGTCCCNGATACTGTGGTCCTTGANAGAGCAGNCATG
CCCAGCATCCACACNATACTGATGCAGTATCAGATTCGTTGGGCTGGTCA
CGTGGCNCGCATGCCAGATCACA
>rnd-1_family-530#LINE/I-Jockey ( RepeatScout Family Size = 70, Final Multiple Alignment Size = 70, Localized to 1000 out of 1011 contigs )
CAAGAGCAATTCCCTGTCGGTTTTCCCCAGTACTGTCCCATTCTCTGTTC
CGCGCGTTGAAATCCCCACANATGAGNAGCCTATCGCCNGGNATCTCCTC
CAACTCTTTGAGCCAGTCCCANTGTTCCCTTGTGACAAAAGAGTCNACNG
CGGCGTANACATTTACGAGGTTCCAACTTGNGCCACCAATNTCCATCTGT
ATNCCCTGAACCTCTCGTGCACTGTGATTCCACTGGCTCAGGTCAAGCAC
CACATGCTTCACTCCCTCCTTCACCAGCAGACCTTGCCCATGTCTCTCCT
GTCCAGCAGGGTTTATATAACTGACGTACCCAGGGCAATGATATCTGTCT
GTATTTAGCTCCTGGAGCATGATGACATCAAAATCANAAATCAGCCTCTC
CAGTACAGGNCCTCTCTGCCTGGCACTNCGACAGTTCCAGTANCCTACTC
TTACATGATTNAAGCCCAATCTCTCCGCTTTTCGCCTNGTTCTCCTGGCN
CCCGCCCTCCTATTTCTATGCCTTCTTCTCTCCCCATTTCCTCGTCNTCT
CCTCCTCACTCTCTCTTCGCTAACCGCTGAAGAATGTGTCAAGCGCAGAG
CA
>rnd-1_family-531#Unknown ( RepeatScout Family Size = 69, Final Multiple Alignment Size = 69, Localized to 1000 out of 1011 contigs )
AAAAACAGTGCANATTTAATGTTCAGTTGTCTTTAATGCGATGAATGAAA
CTGTTTGGATGAATTTTTCATTATTTCCTTTATGTTTATGGGAAGTTTAG
TTAATTNTACCCTCAAATCACTTGAAGGTTGCTCCTGTATCTGTTTTTTA

>rnd-1_family-532#Unknown ( RepeatScout Family Size = 69, Final Multiple Alignment Size = 69, Localized to 1000 out of 1011 contigs )
TCGGTCACCCTGACCGCACATCNGCACGCTCTGTGGCTTCCAAGAATTTC
AAGTCCTCCTTTGCATAACTGCCCATAAGTTTTCTGTTTCCAGTATTCTT
TATGGCAGTGGGAANTCCTGCACTCGTCTGCAGACATCCCGTGTCCTTTC
ATCCAGGATAATTCAATACTGTCATTGATCCTGGTATTGAGCGGGTATTC
CAAGCAGTCGCTCGGTAATGTCCCTTTGTCCGGAGGTTCCTCCTTCCATC
GGATAATCAAAGATCCATGCTTTGTCAACGGGACTCCTCTGCGCCGTTGA
CTGACAACCTCTGTGCGTTTCCTCACTTCGCCGCGCCCTATCTGCCTAGG
GAGAGCCTGAAGTGTTCTACTAAAAGGATTAGTCGCAGTGCAGGTTGGAT
CCTCCGCTATTCTCCTCCGTCCACAGATTCTTGAAAAATCTGTCACAAAT
CTCCTCTTAANACGAGGGATATCTTCACTCATCGTGATCCCACGAAGTGG
GCGCCGCTTACCACTGACNNTTTCTCGGAAGAGTGTCCATTTGTCGCCTC
CTCGGTGCATTCTGTCCTTACCTTGCCAANTTGTCGGGGTGGGATTGTCT
TTAACAAAGATCAGTCCGGAGTCAGAGCACGAAATCAGGTCAGGGTATAC
AGTCAAATCAGTAAGAAACTCAGGTTCGTTTCCTGNAGACTGCTAAGGTG
GNATTTCTTCGCAACGAAGTTTCCACCGNCAGCTGAGATACTCCTGTCGC
TTCCTTCGAAGCGAAGAGTACTACAAGACCAGAATGTTGGGGTTCCCTAC
TATTCATGGCTTGTTCNGCTTCAGGGTCCTTCATCAGAAGTATCCCTGTC
GCCCCAGCTGTACAAGGCAGCAGAGACAAGTTGTCTCCCTGCCCACGAAA
AGTATNTTCTTCTTCGNTAATGGCAAACACTTCTGTCTGTCCATTATCGA
CGTGCACAGGCCTAGCAGAATTGTCCTGTTTATGTCGAGTCTCTAAGATC
GTCAAGACGTCCAGGGAAACTCTCCTCCTCGTCTGCTATTTTCNCCCTGG
TCTGGCTTTCATATGCCAAGTCCAGTGAAAGCAAATNAGGNGGTGTGTTG
CCGCCATCGCAGTCAACTCCTTCGGGTGCAAAGTCAGAACTAACACATCT
CCTATTAGGCATGCGGCCGCATCCAAGGAAATAGGGGACACAGGTTCAGC
GTTATTCCCTACATCAGTCTGCTTTAATTCCTCTTCTTGCATGAAGGGAC
CGAAGGGGATATGGGAGTTGGGTAAGTCTTTGCCCTCGTCCTCATTAATG
NCTGGTGTGNCAGTCGAACCGCTATGTCTACGGTTACAACCGTTATCACG
CTTGTGACTACTGTCAGGTTCGCTCTCATTTNNCTCGTCTGAGNTAATGG
GAGTAAGGGGTTCCAGCAATGTAGATCTGGTCCCTTTNGAAGATTTCTGC
TTCTTGTTCCATCTTTTCCTTTTAGGCTTAAGAATGGAAGTAAAGGGGTC
CAGCAATGTAGATCTGGTTATCCCTANAGAAGAGTTCTCCTTGTTGCCTC
TTTTCCCTGTAGGAATAAGAGGGGTGAGGCACTGTCCTCCGGNTGGTCTA
TGTTTNCTTCCTCAGCTGNTGAGGTACCATTTGGCGCAAGGAGTGCACAC
CTCTCCAATGGTTAGATAGTGAGCCCCCGACCATNCCTGCCNGAGTNTCA
GCCTGGGAGGTGTCGGTTTTCCCTCANNTACCCGCATGTTGTCCTCAACG
CTAATGTTTTCTGCTTGCNGTTCTATCCTATCTTTTTCTGCCCTCTCAAG
TAGCAGTTTTCTTGANGAANCTTCACTCTTTGACAGCCGCATCCTCTCGG
CAAATCCTTCCTGAATACACTCTATCTCTCTTTCTAATTCTTCTCTTATA
AGCTGTATGTCTCTTTCATACTCTACTTTCCTTAGCTGTTCCTCTCTTTC
ATACTCTTCTTTCCTAAGCTGTTCCTGCCTATTATATTCTTCTAGCTCCA
ACTGGCGCTTTTTCTCTGCAGCATTACGGGCAACCATATAATCAAAAGTA
TCCATCTGGCATTTAATATATGTTTCTAACTGTGCCCCTACTCTACCCTC
AGCTATCCCGAATTTCCTTACATCTTTTTGGTACTCGGTACGTAAGTCCA
TTCTCTATCTATCAGGTCTATCCAGAAATAAATATGATACTCCCTCGAGT
CAGGATAAGAAGGATATGTCAGAGCAAAGTACAGTGAACTTGGCACCAGA
GGAGACTATGACAGCCGCACAAAGATGTATATGATGCAAAGCAGCCTACC
AGATTAACAGCCTATAGAATACTATAGCAGCAAAAGGATAAACCTATAAA
TGATCAAAGCGATGTTACACTCAGTCACTAATTATTAATCTCAAATGATA
TGATGTCAGCATGNAATATGTTCTACAATCTATATCAAATGAAATATGCA
AGCAAGAAAAAAAATCATCAATTCATCAGACTACTANCTAAGCGCTATAG
ATTAAACACTAATCAATGTTCATGAAGTGTTCAATGATAGACAGTTAACT
CATATGATTTCATCAATTAATACTTNTACAGTTATTATANTCTAATCTTC
CCCAGTTACCAATTACTAAGTATGATTTTAGTCTAGGGACTGGATGAAGA
GTTAAAATGAAATCTATGAAATTAAACTTCTTATTCGTTAGTCTAGGGTC
TGCCGGGTTTTAGATCGCNGGCGGGACGCCACTTGTGCTCAGGTTNTAAT
TCCGGAGAGCGACNCAATTGTCGCGTGATGTTATAAACCCCGAGACGAGA
TACCCAATTGTCGCTCGATGTTATAAATTCCCGGACGAGATCCCCAATTG
TCG
>rnd-1_family-533#Unknown ( RepeatScout Family Size = 69, Final Multiple Alignment Size = 69, Localized to 1000 out of 1011 contigs )
AGAAGGCTAAATCTAGTCACTTCCGGTTGTGACACAGTCCCGTAAATGCC
GATATATGCCATGTCTGCAGTGACCTGTTCTCGAAAAGCGTAGTTAAATT
CCA
>rnd-1_family-529#LINE/L2 ( RepeatScout Family Size = 70, Final Multiple Alignment Size = 69, Localized to 1000 out of 1011 contigs )
ATCTGATGATTTCAGTAATTTCTTTNAAGCNGANATAGAGCAGTTAAAGG
CCACAATACCAGACTNNCCGTGTGATTTATCCCTGCTGTCATCATTTTGT
GAGAATAAATGCTCCAANGACATTCCTTCTGACATNCCNCTCATGTCAGT
TGCTGAAGTNTTTANATATCTCACCAACCTCAAAAGCAGTAACGCNTCCG
GCTTAGATGGAATCAGCAATAGGATCCTTCGNTGTGCTGCACCAGTTATT
TGCGAGTCGTTAACNTTCATATATAACCAGTGTCTTGCCAAGGGCTACTT
TCCATCAGCATTTAAAATTGCCAAAGTNTATCCTCATCTNAAATCTGGCT
CATTAGACAGTAGTNTTCCAGGTAGCTATAGACCNATCTCCCTACTATCA
TCACTATCAAAACCACTAGAGAAACACATTCATAAAATAACACTTCAACA
TTTAGATNACAACAAACTNATAGTCGATAACCAGTCAGGGTTTCGACCNA
AATATTCTTGCCATACTGCCTTAACAAACATGACAGAAAACTGGCATCGN
AATATCAACGATGANAAAATTGCTGGGTGCGTGTTTATAGACTTTAAGAA
AGCCTTTGACATGATAGACCATAATATTCTTATTAGAAAATTAGAAACAA
TGAACTTCAACCGTAATCTATTAACGTTAATAAAATCCTTTTTGTTAAAT
AGGAAACAAGTAGTCTCNTACAATAAATCCCTATCGCAGACTACTGCGTT
AAATACTGGNGTNCCTCAGGGCTCGATTCTCGGCCCTCTGTTATTTGCCA
TTTACATAAATGACCTTCCNTTACGTCTGTCGTCGNCGTGCGATTTATTC
GCAGACGACTGTACNATCTATACAAGTGCTCAAACGTGTAATGNNCTAGA
GTCGTCNTTACAACAAGAATTAAACAATGTNGTTNAATGGAGCAATGCAA
ACCGCATGCAAATNAACATTAGTAAAACNAAATCTATGCTAATAACAACN
AGACAAAAGCTATANACTTTATCTGCACANAGNACGCTTCAACTCTACAT
CGGTAACAACCCAGTAGAAAGTGTAACTGAGCACAAAACNTTAGGCNTGA
TNATTGATGGAAATCTAACCTTCAATTCTCATGTNCAAGCNCTNGTGAAG
CAAACAGCTAAAAAGGTATACCAGCTTGCAAAAATTAAACACTTTCTGGA
TGAAAACACNAGAAAGATATTCTATACNTCCCACATTCAGACNCATATAG
ACTATTGCTCCACAGTATGGGATGGCTGTCCAAGTTCAGTCATCAAACGG
CTNAAAGCACTNCAAA
>rnd-1_family-535#Unknown ( RepeatScout Family Size = 69, Final Multiple Alignment Size = 69, Localized to 1000 out of 1011 contigs )
TGTCACGAAACGACCTCAGTGGTTCCAGAAGTTAGTACTTGTAATAAGTT
CTTCTGGTTATAGAGAGACAAGATACTATGCCCTTNACCCAAATATTACT
TTAAACCGNATTGATTTAAATGTTTCCAGTCCTTAGTCCAGACAAAGCGA
CCGNGCCTTGNGTAATATTACCTAACACTACTTACACCGCTGTGGCTAGG
GAATTCGCTTTCTCACGCCAGTGTCATGAATGTTATCTCCTGACCAGACT
GCTTTGAACAGACTTTAGATGAGACTAGGGATGTTAGGTTNGATTCTCAC
GCCAGTGTCAGAATGTTATCTCCTGACACAGACTGAGCGGGCCCTTTTGA
ACAGGGGAATTGAGTGGACGCTAGACATNGTGGCGNCGAGAGGTCTGGAG
TTTCACACGTCAGTGTAATTCTCGGGAGAACAGGTGTTTGGCAATTAGGA
ATGTTTGATCTTGGTCAAGGTC
>rnd-1_family-534#LINE/I ( RepeatScout Family Size = 69, Final Multiple Alignment Size = 68, Localized to 1000 out of 1011 contigs )
GCCTTGGAAAGACGATGGAAAGATTAGTGAACAACAGACTGACNTGGTTC
CTAGAAGAAAACAAGATATTGGATGACAGCCAGGCAGGCTTCAGANANTA
CAGACGCACAGAAGACCAGACGACNTACCTNNCACAAGAAATNGAGGATG
CCTTCCAGGAAAAGAANAAACTGCTNGCGGCNTGGNTNGACCTGAAGAAA
GCCTTTGACAAGGTCTGGAAAGAAGGNCTNCTGNTGAAACTGGNANACTG
CGGGATAAATGGGCANATGTACGACTGGATTAAAGACTTTCTTTACAGAC
GCTGNGCNAGAGTCAGA
>rnd-1_family-536#Unknown ( RepeatScout Family Size = 68, Final Multiple Alignment Size = 68, Localized to 1000 out of 1011 contigs )
CCAATTCCAATTCCAATTCGTCCAACAAAAATTCCAAACTTGGTCCTTTT
TCAGCCGCCCGANGGCCTGCTNTATCGAGGANGGTTCCTTTGCTATCTTA
TTTGGTTTCCTTTTNTTTGTGGCGTGCAGTCACACCTGATATTCCGGTTG
TTTGCTTCCTTGCTGCGCTGCGGTGCTTGCGGTTTTTGGTTCTGGTGTGG
TCCAGNTCTCTTTGCGATGATATCGGTGGGTNCTAGCTGACTGTTGCTGG
TGCTTGGTTTGCCTCGTGCTGGTCGCTGCGCTGGTGCCCTGTTGCTGCTT
GGTTGCCGNTCTGTAAGCCGCCGGAAAAAGCCAAACAAACACCAGGTCGC
AACGTCTCGAACAATGTTCCTTTTCAGGACAACCAGGGCCGTCACAATCT
GTTGTTGTGATCGGCCC
>rnd-1_family-537#Unknown ( RepeatScout Family Size = 67, Final Multiple Alignment Size = 67, Localized to 1000 out of 1011 contigs )
TGCTTCTTCCCGTTTGCATTGGTGCATTACTTGCCAGCTGGTCAGCTCTT
TCATTAC
>rnd-1_family-538#Unknown ( RepeatScout Family Size = 67, Final Multiple Alignment Size = 67, Localized to 1000 out of 1011 contigs )
GTATCGTATCGTATAAAATCAAACAAAAATTCCAAACTTGGTCCTTTTTC
AGCCGCCCGANGGCCTGCTNTATCGAGGACGGTTCCTTTGCTATCTTATT
TGATTTCCTTTCCTTTGTGGCGNGCAGTTNCGCCTGAGTTTGTTCGTTTG
TTGCCTAAGTTCTGGTTCTGAGGGGCCTGGTTCCTGTTTAGTTGGCTATT
CGCTAGCTGTTGCACTGTTCATCTGTGTTAGTACCAAGTCAGTCCNCAGC
CACACCGCCGCGAAACAAACAGTCCCGCACACTGAGCGNCCTAAAACACG
GCCCCCA
>rnd-1_family-540#LINE/I ( RepeatScout Family Size = 67, Final Multiple Alignment Size = 67, Localized to 1000 out of 1011 contigs )
AACCTGCAATGGAGCAACGAAGAAATTCTGGAACAANTAAGGAAAGAAAA
CCCCAATGTCAACATCAACCAAGCAGAGAGACTGGGCTCAAAACGGCATC
CATTGCCAGTGGCGGTGATAACATCGGAAGGNGAAGACATCCCGGATAAA
GTCTACCTAGATCAAAGAATGCAGAGACCAGAGCAATACGTGCCACAGGT
NATCCAGTGCTCNCGCTGCAACAAGGCGTGGCACACCGCCGCGACCTGCC
GCAGCAGCCCGNCGTGCCGNTACTGCTCGCGACCCCACGACTTCAAGGAG
TGCCCNCTGGCGAAGNTGGACACNGACTTCAAGAAGCCNAACACGAACAG
AAAGTGCNCCAACTGCTCNGGCCAGCACAGCGCGAGGTACCTGGGNTGCC
CGTACCTGCAANAATGCAGAGAAATNGCAACCACGGCCATACGGGACAAG
ATCCCATACCAGAGGCCCGCAGAAGACACGAGGCAACCCAAGGCATAACT
GCAGCCATACCACCAAATTGAGCAACGAGGTGGCTCGACTCAAAAGNGAN
ATCCAAGCCCTCAGAGACGAGAAAGACGCATCCAAAACCCAACGAGATGA
AGACAGAGACGAGATGACAGGCCTGAGAGCTATNATGCAGGCGNCNCTCG
ANACCCAGAAACGGATGGACAGCAGAGATGACGAAATTCAAGGAGGACAT
CATGAATGCACTGGCCACTATCCAGACACAAAAGGAACAACCAACTAAAG
CAAGGGAAGACGAGGCGGGCGTCAANGATCTGCGGGATAACCAACAACTT
CTCGCGAAAGAAGTCGCAACGATCAAGAAGGCACTGGCNGAAACAGAGGC
AAAGTTACGAAGAGCATACGAAGAAAACGACAGACTNAGCAANGAACTGC
AAGCAACCAACAGAGTGATGGAAGCAAGAGAGAAAGCACGGAAAGAGGCA
ACAAGAAGGCAGCAAATACAGGGAGCCGAGACCCAGAAAAAGCCGCATCA
AACACCAGATAAGAAAACTCCGACGCCGCTGATGAAACAGTTTCCGTTGG
CAACNGTTGACCAAATAAACCAACGCATCATGGAGCTGGAGGACCCGAAC
TTCTTTAACTCAGAACTGCAAGATGATGATGTTCTTTGGTCATCACCAGA
GGAACCACATCGACAGCCAAAACCTGAAGTCAAACGAGGTCGACACCGTT
ACCCCAAACACTAATACCAGATACGACACAACCAAGGCCAAATTACCGAA
ACCCTATGTAGGAGCAGTACTTTACAACAAGGATACGAGAAAATCACCAA
ATAATACCAGACCTCACCAGTATNGCCATCAGTACCTGCCCAAGTCAATC
GACCGCCGGTCCTTATTAGGATAGGCAATCTACTTTCCCCGGAAACAACA
AACAGCCAAGGAATACCACAATAAATCGATTCAACATCCAATCATCTTGA
GCGCAGCACAGGGCCAGCCAGATTACAAAAGCAACAGCAAGAGCGGAAAC
CACAACAAACAGAAAGCGACAATATTGAACACAATCCAAAACCAAATGAG
ATCGAGACCAGAAAACGTCACCACAAATATAGCTGAAAGGAAAGNGAGCA
GAAATGTGANCGGACCTAGCTGAAAGTGGTCAACGAAAGAGAATTTGAAT
T
>rnd-1_family-541#Unknown ( RepeatScout Family Size = 66, Final Multiple Alignment Size = 66, Localized to 1000 out of 1011 contigs )
GTACAAGTATGCAGAGAGTTGTAGCTGAGATCAAGCATGTTACAGAGACT
GTTGCACGTACAAGTAT
>rnd-1_family-542#Unknown ( RepeatScout Family Size = 66, Final Multiple Alignment Size = 66, Localized to 1000 out of 1011 contigs )
AAAGTCTTTATCAACGGAGTACTAAATACAACACAAACTGTGACTGGAAA
ACTCAACGGACAAGACAACAGAGC
>rnd-1_family-543#Unknown ( RepeatScout Family Size = 66, Final Multiple Alignment Size = 66, Localized to 1000 out of 1011 contigs )
ACTAGATTTAATTGCCCGGCTTCGCCCGGGATAGTGAAAGAAAGTTTTAT
TCTCCCGTCCTCTACCTCATCTTGGTCTCCACCGCTGCCCTATATG
>rnd-1_family-544#DNA/hAT-Blackjack ( RepeatScout Family Size = 66, Final Multiple Alignment Size = 66, Localized to 1000 out of 1011 contigs )
GCAATGTAGACCTACAGTTAACATCTTTATTTCAGTTTGACTTTGTTGTG
ATGTCCTGGTACGGACTAACGGAGATTCGCGCCATTTCTTATTGTATTTG
TTGTCTTCCTAAACGGATCGTGACTTCGATAAACCAAGGCCCTCTGTAAT
TTATGTTAATCTACTAGAATAAATGCGGGATATAAAACCAAAACCCACCA
CTGATACCAAGTGATTCAGACTGTTCAGAAACTACTTGAGGACAGAAAAT
AGAGAGGATATAGACCTAGTTCTATCTGTGATAGATTTTATTACTTTTAC
CAATGGCCACGTCATCCAAAAAAATGGAAAGCATCTTATGACATCGCAAG
TATAATAGTAACTGGAAGAAAACATACCCACGGCTCAAAAGATCTTCAGA
CGGATCAGAGGCAGCATATTGTAAACTGTGTCAGTGCACTGTTGCACCAA
GAATTAGTAGCATATCAAATCATGAAAAATCCGAAAAACACAGGATGAAA
ACTCCGTCAAAAAGCCAGTCACAGCTTATTACAACAATGACTCCTAGGCA
AAGTAATGATAAAGTTAAAGGCAGCAGAGTTGCAACTTGCTGTAGGCATG
ACCTGCCATTGTGCAATACGCACAATTGATCATCTAAGTGAAATCATGAG
AGCGCATGGTCGGGGGAGTACATTGGAGCACATACAGTTGCATAGAACTA
AATGTTCATGCCTAATAAAAAAAAA
>rnd-1_family-545#LINE/I ( RepeatScout Family Size = 65, Final Multiple Alignment Size = 65, Localized to 1000 out of 1011 contigs )
CCTTGTGTATGTATCCATGTTCACATCTATGCACTCATCATACTTACACT
ACCTCCCTTACGCTAGGGTGTCCGGAGTCACCATCTGATCAGTTCCTTCT
GCTGTNCTGAGTNGATCCTTAACCTGGTCTTTTTAGTTTTGGTTTGTTTT
AATNAGGTACTGTTTAACCAGTTTTTGGATGTCTTTATTGCTATCCACNT
TTAAACATTTGTTTGCAGTAATTTGTTGTTTGCGTTTTAGAAAATACTCC
TCAATGGGTTTCCTTTCCAATTTATATTTAGTGCAGTTTATCATATAATG
CTCTANTGTATTATCTTGAAAGCAGTCCAGACATAGTGGAGATGTAAATT
TCTCTGGGTGCCACCCTAATCTAGCTCTCCATAGTAGTTTGTTAGCTGGA
ATTTTCAGTTTGTCCCGTACCTGTGTGTTAAGGCTGGGCTCTTTAAGGTT
ATTGTAGGCATCTCTGCCNTTATCGCTCNTTTGCCACTGCAGTTTCCACA
TTTTAATNATATGTCGTTTGATTATGCTGGTCCTTTCAGTTTTTCCGAGT
CCTACATCTATTAAAACATCACATTTTGCTCCCTTTTTGGCTGCTNTGTC
AGCTTTTTCATTGCCNATTACACCTCTGTGCGCTGGTACCCATGCAATGG
TGACTTGGCATCCTTTATTCTTGAGCTGNGTTGTTAGATTTAGGATCGTC
TCTTTAATATCTGGTCTACTGCTAGTTTTATGTGTTTTTAACGTCTGCAC
CGAGGACAGTGAATCTGTCAGTATGGTAAATTTAGTTGGAGGTTTATTAA
TTACCATCTCTAGTGCCTTCATTATGCCGACTAGTTCTGCTGTGCATACT
GCCACATGATCTGTTATTTTATATTCTCTTTGTATNTTCCACTGTGGGAT
TATTACTCCTGCTCCTACTTCTCCTGCTTCGTTCTTAGATCCGTCAGTGT
ATGCAACCAGGTTGTCTGATCGGATCTGGTCTATGTATTCTTCTGCTATN
GTTTTGGCTTCAAATGTTTCAGTATTCTTATTAATAATTTTCGCCAGGCT
CATGTCTGTCCTGGGCAGTTCTAGTCTCCATGGAGGGATTTGAGGGATAA
ACCTAACGCTTGCCTCTAGAGTCCTAGCTAAGTCCTCATCATCGTTNATT
TCTANTGCAGCGTCCCAGGCTGCTGGTCTCNGTATGTCTCTGACCGGTTT
GTCACCTAGGTGGGTAATGTTATGATGAAAAGCGTCTGAGGCTGGGTGTC
TGGCATCGTTGGCCGCTTTCATCCAATAGCTGTANGTTAGTTGCTTCCTT
CTGAGGTTNAGCGGTGTGACGCCTAGTGCTACCTCCATNGCCTCTCTCGA
TGTCCCTTTGCCAGCGCCCATGATGGNAGTCAGGGCTTGGCACTGAATNC
TATCAAGTTTGCATTTGCTGTTCTCTGATGCTGANTCGTATACTACGCTT
CCGTATTCCATTTTGCCTCTAACGAANGCTTTATAAAATTGTATCAGGGT
GTCCTGGTGTGCTCCCCATCCGTTTCCTTTAATCATTCTCAGCATATTAT
TGTACTTTGTGCACTTTACTACGAGTTCGTCGATGTGCTTAGCCCAGGTC
ATTTGCTCATCCAGAATCATTCCTAGGAATTTCGTCGANCGTGTCCGCTG
AACTGTTCTGCCATTAATTTGGAGTCTCGTTTCTTCNGGGTCATAATTAA
GCTGTCTTTTAAAGTTAAATATCATGCTTACTGTTTCGTCGGCGTTGATT
TTAAATCCCCATTTTCCCATCCAATNCGCNACTTCGTTTAGACTTTTCTG
TAGTCTTTTCTTAGCGCAGGGNATCTGATTATGGCTGTGGTAGATTGCAC
AGTCGTCCGCAAATTGCGTTAGTCCTGTTTCNTTGTTCGTGATGGCCTCA
TCA
>rnd-1_family-546#DNA/TcMar-Tigger ( RepeatScout Family Size = 65, Final Multiple Alignment Size = 65, Localized to 1000 out of 1011 contigs )
TACAGTAGAACCTCGCTTAACGAGCACCTCTCATAACGAGTAATTCGCAT
AACGAGCAAAACAAATTGTAAAAGAATGACTTGCTTAACGAGCGACGTTT
CGCATAACGAGTGGCGAGGAGAGGGGAAGTCCCGGATTGTGCGCATGTTA
CATCAGTCTGTGTTTAGCACTCGTTCCAGTAGCATCGTAGTGTCGCTTGT
GATCACACATTTTCTCAAACTTGTGTTATATTGTGATATATGTACATGAA
TCCTCCAGGCCTACAAGATGACCTCCCTGAAGAATTTAAGTTCATCAAGA
TCCAGTTTCTGCCTCCCAACACCACTCCGTTACTCCAGCCCATGGACCAG
CAAGTTATTTCTAACTTTAAGAAGCTCTACACTAAAGCACTCTTCGAGCA
TTGTTTTCAGGTGACTGAAGGGACCAACCTCACTCTCAAAGAGTTTTGGA
AAAATCACTTCCACATCGTTGCCTGCCTCAAGATGATCGACAAGGCGGGG
GAAGGGGTTACCAAGAGAACCCTAACTTCTGCTTGGAAGAAGCTTTGGCC
GGAGAGCGTTGTCGATTTGTGACTTTGAGGGGTTCGAGACAGTACCTGTG
GAACCTGTAGTCAACGAGATTGTGTCTTTGGCCACTATCATGGGATTGTA
GGTGGATAACAGTGATATCGAAGAGCTTGTGGAAGAGCACAGCCAAGAGC
TGACCACCGAAGAGCTTATGGAGTTGCATTGTGTTTCACAGCAAGAAGTT
TTGGAGGAAAGTTTGTCAGAGGAGGAGGAGGTAACAGAAAAGCAACAATC
TTCTGGCGAAATAAGAGAAATGCTGAAAGCATGGGAAACTGTTGCATCTT
ACATTGAGAAGCATCACCCTAATAAGGAAGTGGCTATGCGCGCTGCAAAT
TTATTTAATGATAATGCTGTGTCGCATTTTCGCCAAATTTTGAAGCGTCG
GCAAAAACAAATGTCTCTGGACATCTTTCTAGTAAAAAAA
>rnd-1_family-547#DNA/TcMar-Mariner ( RepeatScout Family Size = 65, Final Multiple Alignment Size = 65, Localized to 1000 out of 1011 contigs )
GGGGGCAAAAGGGCTGCCTGCAAAGGACATTCATAAGGAAATGCTTCCTG
TTTATGCTGACAAATGTTTATCCCGTAAAGCGGTGCATAGCTGGGTAAAA
AAATTTTCTCAAGGACGCTCTAAAATTGTTGATGAAGTCCGATCTGGTCG
TCCTGTTGAGATTGCAACAGACGCAT
>rnd-1_family-548#Unknown ( RepeatScout Family Size = 65, Final Multiple Alignment Size = 65, Localized to 1000 out of 1011 contigs )
ATCGTATAAAATCAAACAAAAATTCCAAACTTGGTCCTTTTTCAGCCGCC
CGANGGCCTGCTNTATCGAGGACGGTTCCTTTGCTATCTTATTTGATTTC
CTTCCTTTGTGGCGNGCAGTTNCGCCTGAGTTTGTTCGTTTGTTGCCTAA
GTTCTG
>rnd-1_family-549#Unknown ( RepeatScout Family Size = 65, Final Multiple Alignment Size = 65, Localized to 1000 out of 1011 contigs )
TGTGCTGGGGCCCCTACGACAACCACTCACAGGAATGAAATGTAAATGGT
CACTTGACATACACAGATTAGCAT
>rnd-1_family-550#Unknown ( RepeatScout Family Size = 65, Final Multiple Alignment Size = 65, Localized to 1000 out of 1011 contigs )
TGCTTGATCTCAGCTACAACTCTCTGCATACTTGTACGTGCAACAGTCTC
TGTAACAT
>rnd-1_family-551#Unknown ( RepeatScout Family Size = 65, Final Multiple Alignment Size = 65, Localized to 1000 out of 1011 contigs )
AACAGACCGCGACACCCATAACCTCGACCACGGTAGACTAGTCCAACCAA
CTTATCAATGGAGTTGACCTACAACCGGCGGTGTGTAAATGGGGAGACCA
NCGTATAAATAACC
>rnd-1_family-552#Unknown ( RepeatScout Family Size = 64, Final Multiple Alignment Size = 64, Localized to 1000 out of 1011 contigs )
TTATTTATCTTCAAAATGATAATTNATTCAATAAAACATGTTGCAAATTA
ATTAAACTGTAGTTTAATTTGTGTATAAATCTAC
>rnd-1_family-553#Unknown ( RepeatScout Family Size = 63, Final Multiple Alignment Size = 63, Localized to 1000 out of 1011 contigs )
ACCAGAACCTGACAGCAGAAGCCAGACCCCGCCCATCCCGTTCCAGGCCG
CCCAGGCACATATGGCNGTCCTTTTCAGGACTGCCANNTCCACTCCCCAA
AACCGCAAGCCGCCCGCCAAGCCCACGCTGCTGACATGANGCAACAAACG
AACAAAACTCAGGCGAAANTGATCGCCACAAANGAAAGAAATCCAAATAA
GATAGCAAAGGAACCGTCCTCGATAAAGCAGGCCNTCGGGCGGCTGAAAA
AGGACCAAGTTTGGAATTTTTGTTTNTTTTTATACGATACGAAC
>rnd-1_family-554#Unknown ( RepeatScout Family Size = 63, Final Multiple Alignment Size = 63, Localized to 1000 out of 1011 contigs )
AACTCTTTCAGGACGGCATTTTTTCTGGGGTTTGGACAGCATTAATTTTG
AGCGGAATTTTTTTACTGCAACACGACAAAGCTAAAACCTTCCTGAAGAA
AAAGTATTGGCTGTATAGGGACATATAATATATCAAATTAAAGATAAATG
AGTGCAGAATAAATCTAAACTATTTAAGTGTCAGTATTACAACAAAATAT
TATTAAAATCACACAACATTCAAGGATGTTAGACACATATGAAGATTATT
NACATAAAAAATNTTGTGCTTACCTTACTTTTTTACTTGTTCAGCAACAC
TGCTATCCANTTCTAAGAATNCACATGCCTTCTCTGTTCAATTATGCATC
AGCTAGTCTTTATTTGAAACAATTAATTTAAATACTTTGGATGTTATGAT
CATTTTTGTATGACATGTCAAATTTCACAACAACCGAAAATCGGAAAAAC
AGCTGATCGAAACAATGATCCGATTGAAATATTTTGTTCAATTTTCATAT
CCTAAACTAAATTATCGCCAATAGGTTTGTCACTTAGATATCAATCATAA
TATCAAGACTGTTGTCACCATCTGGCAGAGATTCATCAACGACAGAGCAG
TATGAACAGTTCTAGACCTTTTCCCTTATCATTTGGTATAGAAAAATCAC
GTAAAAATTGTATCNCATCTAAATAATTTNTTTTAAATCAGAAAATAATG
CACCGACCACGACGAACNTCGCAAACGAAAGNACTTCCTGTTGCTAATCC
TAGTTTTTCAAAAACNTGTTCATAAAAGTTCGTTTTCCCNGCAAACGGAA
CAAAATTAGAGTGTCTCTATCATGAGCCAGTANACTGGCGATACGTCTTT
AAGGGATAGACTTAATCGCCAGTATACTGGCTAAACGTCCGTAAAGAGT
>rnd-1_family-555#DNA/TcMar-Tc1 ( RepeatScout Family Size = 63, Final Multiple Alignment Size = 63, Localized to 1000 out of 1011 contigs )
AAAAAAAAAAAAAAACGCATAGTTATCCGATGGCGCGTTTTTATTAGTTT
GTAAATAAAATATCGTACTCGGGTATGTGAAAAGCAGACTCAAATGTTGT
TTACCGTGTCCAGTGGACATGTGGGCGTGAATTGCGTGGGTTTTTGTAAT
CGTTACAACGCAGTGGTCAGTTGTGTTTAAGACCATATTTGTGAGCATAG
CTCACGATGCGCGCACGAGAAAGCAACACAATTTGCGGTGAACACTATTC
ACTGCCTACGCAATTGAAACCCTATAAAAGGATAACGCTACACCAAAACG
NTCAGTTCATTTTCAAGCAGTCACGAATGGCGCCTCTATCGATAAATTTA
AGGAATATTGCTATTGGCCGATTGCAGGCAGGAGAAAGTCAAAGTCAGGT
TGCCAGGCATCTAAACGTGCATCAGAGTACCATCAGTCGACTTTGGCACC
GGTTCCAAGCCACTGGTTCAGTTGAAGACCGACATCGCAGTGGACGACCC
AGAGTGACAACAGCAGCGGAGAATCGCTTTATTCGGCTTCGTCACCTCAG
AGACAGGTTTACAACAGCTTCCTCAACTGCGCAGGCATTGCCTCCAGGAC
GTCATGTGTCTGATCAAACTGTTCGGAACAGACTGCATGACGTTGGACTT
TGGGCACGACGACCACACCGAGGACCTGTCCTTACGCGTCGCCA
>rnd-1_family-556#Unknown ( RepeatScout Family Size = 62, Final Multiple Alignment Size = 62, Localized to 1000 out of 1011 contigs )
GTGTTCAGTTCAGTAAAATAAACAGATGTTNAATGTGATGATTATATTCA
TTTGCTTGATTCAANTTAGGACTTGTAGTCCGTGCACGTGGTTCGTCTAG
GCGTGTGTAGCCATGTATTTAGGTTGTTGTCGTGTAACTCACTATNCAGA
TATTCNTCGCCTGGGTCTCGGTGAAATATTTCATGGTCCCTGCGCAGAAG
AACCCTTGTCTTTTCTTTACTTTCCTGTTTTTGCTGTTCAGCGGGGAACT
ACTACTTTTGTCCTAACCACAATTTCC
>rnd-1_family-557#Unknown ( RepeatScout Family Size = 62, Final Multiple Alignment Size = 62, Localized to 1000 out of 1011 contigs )
TATCTAGAAATATCTAAAAAGGTAAGNGCATTTATTTNAGTAACATTAGT
CAGTATGTACATGTTTTTTGTTTAACTTCAAACAAATGTGGACCACTTCT
TAAATCCCGCAATGATAAATGTATACACATTATCATTAACTATTATCGTG
CATGTCGTAAGAAACAGACGAGCAACGTGAGGTAAGACTGGAAACCAGTA
TGTACATGTTTTTTGTTTACTTCAAACAAGTGTGGACCACTTCTTAAATC
CCGCAATGATAAATGTATACACATTATCATTATTCCCCGTGTGGGT
>rnd-1_family-558#Unknown ( RepeatScout Family Size = 62, Final Multiple Alignment Size = 62, Localized to 1000 out of 1011 contigs )
CAGCTGGATTTAGATGTAACTATATGGTCATGTTGCTAGGGTTTTTAGGC
GGCGAGAAAGACAAAGTTCTGCCAAAACGGCCCGCTCTAACACCTGCTTG
CTGACCTGAAGTAAAATGGCTGGCAATCTTGTCTCACTGCGGGATTTCCG
GTGTTTGGCCAGGGTTTTCCCCGCTACGTTGCCGAGTTACTAGCCGTATA
TTTTTATACGTGAAAGCTCAGGGGAATTACAAGTAGGACAATGGAAAATC
CCCAAACAGCAACCGTAGGCTATAACCGGGATATCTCTCAATGCGTCTTA
TGACGAAAATGAAGTCACTGGGCGCATGTAAGAGAGAAAAATAGAAGGGT
CACAAAGGGGTGGTACGTCAGCCAAGAGTATCTTGTCTACTTGAAGCGGC
GTCTCGCGACAGAAGCCCCCCTTTCGAAGCTTTCTGTAAGAATGCTAAGA
TCGCTGTCAAGTAGAACAAGAATACCAGACTACCACTTCCTGGCTCCCAA
GACTTCCACTGGTCTGAATTTCCAGTAGTCTTTATGACAATGTCTTGTCC
AGTAGATGTGCTTAAAATGCATGCACCAGTGGTGTACTGACCGTTTGTCC
GGAGGTATTGCATCCCCCAGAATCAATGATTTCGTGGGTCTGGATGCTGA
GATACCAAGGCCAACCTGATAACAAGNCTTAGCCCACANTGTACCTAGAT
TCTGCCCTATCTGCCTAGGGAGAGCCTGAAGTGTTCTACTAAAAGGATTA
GTCGCAGTGCAGGTTGGATCCTCCGCTATTCTCCTCCGCCATTACCGATC
TTGGNANAATCTGTCACAAATCTCCTCTTAANACGAGGGATATCNTCACT
CATCGTGATCCCACGAGGTGGGCGCCGCTTACCACTGACNNTTTCTCGGN
AGGGTGTCCATTTGTCGCCTCCTCGGTGCATTCTGTCCTCACCTTGCCAA
NTTGTCGGGGTGGGNTTGTCNTTAACAGAGATCAGTCCGGAGTCAGAGCA
CGAAATCAGGTCAGGGNATACAGTCAAATCAGTAAGAAGCTCAGGTTCGT
TTCCTGNAGACTGCTAAGGTGGNATTTCTTCGCAACGAAGTTTCCACCGN
CAGCTGAGATACTCCTGTCGCTTCCTTCGAAGCGAAGAGTACTACAAGAC
CAGAATGTTGGGGTTCCCTACTATTCATGGCTTGTTCNGCTTCAGGGTCC
TTCATCAGAAGTATCCCTGTCGCCCCAGCTGTACAGGCAGCAGAGACAAG
TTGTCTCCCTGCCCACGAGAAGTACNTTCTTCTTCGNTGATGGCAAACAC
TTCTGTCTGTCCATTATCGACGTGCACAGGCCTAGCAGGAATTGTCCTGT
TCATNNCGAGTCTCCTTCCTAGGATCGTCAAGACGTCCGGGGAACTCTCC
TCCTCGTCTGCTATNTCCNCCCTGGTCNGGCTTTCATGTGCCAAGTCCAG
TGGAAGCAAATNAGGNGGTGTGTTGCCGCCATCGCAGTCAACCCCTTCGG
GATGCAAAGTCAGAACTGACACTCATCTCCCTATTAGGCATGCGGCCGCA
TCNAGGGAAATAGGGGANACAGGTTCAGCGTTATTCCCTGCATCAGTCTG
CTTTAATTCCTCTTCTTGCNTGAAGGGACCGAAGGGGATATGGGAGTCAC
TGGGTAAGTCTTTGCCCTCGCCCTCATTAATGNCTGGTGTGCCAGTCGAA
CCGCTATGTCTACGGTTACAGCNGTTATCACGCTTGTCGCTACTGTTCGA
TGTGTTCGGGGTCCTCTTAGTCCTACACTTCCCTTTCGGAACATGCCGAT
TCCTCTTCTTNCACTAAGGAACNTAAGGGGTTAAANGAATCGGGTGTGGT
NTTTGNGGTTCGTCCGTCATTAATGTCTGGTGTGACGGTCGAGCCGCTGT
GCCCACGGTTACAACCTTTCTCCTTCCATGATTCCATTTAGGCTCGGGAG
GAGTCTCCTCATTTNTCTCGTCTGAGNTAATGGGAGTAAGGGGTTCCAGC
AATGTAGATCTGGTCCCTTTNGAAGATTTCTTTGCTTCTTGTTCCATCTT
TTCCTTTTAGGGACAGGAGGCTTCTCATTTTGCTTATCAGGGCAATGGAG
ANTACAGGGGTCCAGCAATGTAGATCTGGTTATCCCTGNAGAAGAGTTCT
CCTTGTTGCCTCTTTTCTCTGTAGGAATAAGAGGTGTGAGGCACTGTCCT
CCGGTTGGTCTATGTTTNCTTCCTCAGCTGNTGAGGTACCATTTGGCGCA
AGGAGTGCACACCTCTCCANTGGTTAGAGAGTGAGCCCCCGACCATNTCT
GCCNGAGTNTCAGCCTGGGAGTTGTCGGTTTCCCTCGCANNTACCCGCAT
GTTGTCCTCANCGCTAATGTTTTCTGCCTGCNGTTCTNTCCTATCTTTNT
CTGCCCTCTCAAGTAGTCGATAGTTATGCAGCTTTTCTTGANGAATTNCT
TCACTCTTTGACAGCCGCATCCTCTTGGAGTTGTCTAGCATCTTCTTCTT
CTTC
>rnd-1_family-560#DNA/TcMar-Mariner ( RepeatScout Family Size = 61, Final Multiple Alignment Size = 61, Localized to 1000 out of 1011 contigs )
GACTGATAAAACGATGGGACAAGTGCATCAATGTTGGTGGAAATTATGTT
GAAAAATAAAGGGACAGTGTATGTGTAAAAATAAACGGTTTTCAAGTTGT
TA
>rnd-1_family-539#Unknown ( RepeatScout Family Size = 67, Final Multiple Alignment Size = 61, Localized to 1000 out of 1011 contigs )
TTTAACCAAGGGTTGTAATTTTGGCTGTACGTTTGGCAAGCACTTTACTC
ATGTTCCTAATGAGTTTT
>rnd-1_family-561#Unknown ( RepeatScout Family Size = 61, Final Multiple Alignment Size = 61, Localized to 1000 out of 1011 contigs )
TACAGTGCAGACCGCTTAAGGCGATCTCGGATGTGGCGAATTTCTGTTGT
GAAGA
>rnd-1_family-562#Unknown ( RepeatScout Family Size = 60, Final Multiple Alignment Size = 60, Localized to 1000 out of 1011 contigs )
AAAGTGTTTTGTAGGGTGATGATCCTGAAGCCGCTGAGTCTGGAATGATC
TTTGCCTGGTTTTG
>rnd-1_family-563#Unknown ( RepeatScout Family Size = 60, Final Multiple Alignment Size = 60, Localized to 1000 out of 1011 contigs )
TGTCACGAAACGACCTCAGTGGTTCCAGAAGTTAGTACTTGTAATAAGTT
CTTCTGGTTCTAGAGAGACAGGATTATATTTACTATGCCCTTNACCCTAA
TATTACTTTAAACCGNATTGATTTAAATGTTTCCAGTCCTTAGCCCAGAC
AAAGCGACCGNGCTTTGNGTAATATTACCT
>rnd-1_family-564#Unknown ( RepeatScout Family Size = 59, Final Multiple Alignment Size = 59, Localized to 1000 out of 1011 contigs )
TGTGATGACCCTGCTTTGCATGGTCTCCACGATTACATTGTGGCAAGCAG
AAAGTCCGTGCNACAAGNGACGGCACGAGATACTTGTGGCTGGTCGAGTA
AGCGAGGGAAAGCCCGAGCTAGNCTCGTGGTCAGTCGATCATCAGAAGTC
AGAGAAGACGGTTGTAGTATTTGAAGATGTNGTCTTTATGTCGCGCGAAT
GGTTAGTGTTCGAATATGTCGCGAGTGATAAAGTGTGAATAATGTTTGAA
CATGTGAAATAAATGGACCAGAATAAACTGACAGAATGTACNAAGAAGCT
GAGCGGCGTTTGTGTTGTCAACCCTAGACGTTAAAGCCGGTGCAAACCAA
GGTTCATTCCAAGT
>rnd-1_family-565#Unknown ( RepeatScout Family Size = 59, Final Multiple Alignment Size = 59, Localized to 1000 out of 1011 contigs )
TTAACTCTTTCAGGCCCATGAATTTTGACAGACTTGGCCCACATTAATTT
CCCTTTACAAAAATGGCAGAGGGGTGGGTGTACAAGAAAGGCAATAGAGA
ATGTAATATACTTCTAATCCCTATAAAAGTATATATTTTTTTAAAGAGAA
ATGAATGTACATTTTGAATCTGATGATAAGTGTTTGTTTAATNCTGTTAT
AGTTAGTAGGAAAGAAGAATTCAGCAGGTGTTAATTTCACAAAGACAACA
TTTTACAAAAAAATTCTTCACTTACCATGGTTTTGCAGCCACAAGAGCAG
TGAATATCCAAATTTGAGAACAAAACTTCAAAGTTTGTTCAATTTCCTAA
CAAATTCNAAAGTTATGATAAGTTTCTGGGTTAGTTTANCACTCAGGGGC
TCTTAGTTCTCACAGAGTGCTGAGCAAAATTTCAGAGAAAAAATGGCAGA
AAAATGAGCCATTACACACACACTATTTACTATTCACTTTGTACAGTTAT
ATACAGACTGTAGCTGCGATGATTTCAATGTAGCTTAGCCATAGTATAGT
ACTGTCTCTTTGTTTAGAGCACTTTCCTTCTCTTACACCATAAATACGGT
AGCAATGGGACATTGTCTGTGTAATAAACTCATCAGAATCGCTAGATTCC
GAACAGCTGATCGCTCAGCTTCGCTGGTGAAAATTCACCGTCCGAATCAC
TTTCCGAAAAATCTAAATTTTTATTATCATTATCAGAATTAAAAACATCT
GACTGAAACAATTTCAGAGCTTCGGCCGCAGAAAGACGCATTCTGCGACC
TGTACTTGTGGTTGGAACATTGGTATTCATGGCACTCGAAAACGAACTTA
GAAAATGCACTGTTGAAAAAATTTCGCTGTTGNTTTCTCTCAAATTATCC
ACGTGTGGTTTAGTCCAGGAAATGAAACTAAAAGGATTTCGGCAGAGTGA
CTTTCCCTGAATANTTTAATCGTANTTCCGAACATTAGAAACNAGTACGG
AGCCGCGTGCGAAGCAANATGTACGGGACACACGATCGACGATGACAGCG
TTGTTTGGGCAAAACGGAACTTCTCAATCAACGCTCACACCGTTGCTCGG
GCCTNAAAGAGTTAA
>rnd-1_family-559#LINE/RTE-BovB ( RepeatScout Family Size = 62, Final Multiple Alignment Size = 59, Localized to 1000 out of 1011 contigs )
GAGGCATCTAGAAAAAGGGCAGCTGAACAGCGAAGACAGGCTAGAAAGAA
CCGTANAACAGGCCCTTTACCTACAGACACTGTGCCCTGCCCTCATTGTC
CTAGATCCTTCCGGGCCCGTATTGGGCTTATAAGTCACCTCCGGACTCAC
AAACATTCA
>rnd-1_family-566#Unknown ( RepeatScout Family Size = 58, Final Multiple Alignment Size = 58, Localized to 1000 out of 1011 contigs )
AGTTGATTTTCAGCGATGACGCCTGGTCTCGCAGTGTGTTTAAGGAGGCA
TGCACCTTATGGTTTGCCAGATCAAATCGTGTGTGTTTTGCTGACTGAGG
ACACTTTGTATGGCTACGGCATTCACTTGAAGTATCCAGCGTATCTGACT
CAGTTTGTGACTGGAATCGCTGGCACAGGCAGCGGAGCAANTATGGGNCA
AGCCCGTTTGCTGTGANGCCGGAACCGTAACGACTAACTAACTAA
>rnd-1_family-567#Unknown ( RepeatScout Family Size = 58, Final Multiple Alignment Size = 58, Localized to 1000 out of 1011 contigs )
TTGTTCGTCCATCACAAGTGATGAGGACCACTCTTTCTTTCATCCGTCAT
GAAACTATAGTTGATTGT
>rnd-1_family-568#Unknown ( RepeatScout Family Size = 58, Final Multiple Alignment Size = 58, Localized to 1000 out of 1011 contigs )
ACTCTGCCCTTTACCCNAATATTACTTTAAACCGNAATTGATTTAAATGT
TTCCAGTCCTTAGTCCAGACAAAGCGACCGNGCTTTGNGTAATATTACCT
AACACTACTTACACCGCTGGCAGCTAGGGATTATTCCNTTCTCACGCCAG
TGTCAGAATGTTATCTCCTGACCAGACTG
>rnd-1_family-569#LINE/RTE-BovB ( RepeatScout Family Size = 58, Final Multiple Alignment Size = 58, Localized to 1000 out of 1011 contigs )
GAAGCTCAGGATATAAGGCAAGAGGAAGACCGAGGAAACGGTGGATTGAC
GGNGTCTCCGAAACCTGCCAAAAGCACGGCCTCAGAACATCAGATGCTGC
CCGCCTTGCTCATGACAGGAACTTGCGTCTCCCCACNACGCTTNGCGGCA
TACGTGGAAGGAAAAAGNAAAAGTAAAAGTAAGTA
>rnd-1_family-571#LINE/Penelope ( RepeatScout Family Size = 58, Final Multiple Alignment Size = 58, Localized to 1000 out of 1011 contigs )
CACACTCTGATGGCCTCCAGGCTTTGCGGTTCTTTCTAGATCGNAGAGTC
AGCCCTGCCATAGCCACTGACCCCTTGATACGTCTGGCCGAGTTAGTGCT
CACTCTNAACTCTTTCGAGTTTAATGGCCAGTATTTCGACCAGATCAGCG
GCGTCGCNATGGGCACCAAGATGGACCCAGCTACGCCTGCCTCTTCATGG
GCCACCTCGAGCACCAGATACGTCATGCATATACCGGTAGGCTCCCCGAG
CCCTACCNGAGGTATATCGATGATTGCAGTGGTGTCACCGATATGCCCCT
ACCTGAGCTGCAGAACTTCATTCATTTT
>rnd-1_family-573#Unknown ( RepeatScout Family Size = 57, Final Multiple Alignment Size = 57, Localized to 1000 out of 1011 contigs )
GATCATATTTGGCAGAGTTTCAGTGGCGCCACNCCCACAAACANCAGATT
NTCGGCCACTATTTGCAACTCCTGCGTCAAAATTTTCACATNTAAAGGCN
TCAATTATCGGTAAGTAGTCGATTTCGTCATTTTCCCCTTTTTTCGTTCC
TTATTANTTTCGAGTTCAAGTTTTTGAATGTTTACAACACA
>rnd-1_family-574#Unknown ( RepeatScout Family Size = 57, Final Multiple Alignment Size = 57, Localized to 1000 out of 1011 contigs )
TGTAATAAACCTTGGCTTGACTTGGAATGCGCCTTGGCTTACTACNTATC
GGCTTTCGCCACGGCTCACTCTCTGGATGTTACTGCTACACAACTTGCAC
CGCTTTAACGTCTAGGGTTGACAACACAAACGCCGCTCAGCTTCTTNGTA
CATTCTGTCAGTTTATTCTGGTCCATTTATTTCACATGTTCAAACATTAT
TCACACTTTATCACTCGCGACATATTCGAACACTAACCATTCGCGCGACA
TAAAGACNACATCTTCAAATACTACAACCGTCTTCTCTGACTTCTGATGA
TCGACTGACCACGAGNCTAGCTCGGGCTTTCCCTCGCTTACTCGACCAGC
CACAAGTATCTCGTGCCGTCGCTTGTNGCACGGACTTTCTGCTTGCCACN
ATGTAATCGTGGAGACCATGCAAAGCAGGGTCATCACA
>rnd-1_family-576#Unknown ( RepeatScout Family Size = 57, Final Multiple Alignment Size = 57, Localized to 1000 out of 1011 contigs )
ACACTATATATCCCAATTATAACCCTGAGGGTTGAACAGGATATTTTTGA
AAAATTACTACTACT
>rnd-1_family-577#LINE/RTE-BovB ( RepeatScout Family Size = 57, Final Multiple Alignment Size = 57, Localized to 1000 out of 1011 contigs )
CAAGATTGCAACACTTAACACCGCTGGCCTGGGAAATAAAACAGAAGAGA
TTATTGAAATGATGGAAAAAAGGAAAATCAAGTTAATGGGGCTAGCNGAC
ATAAGACGNAAGGGAAATAATAANAAGAAAATACACGAAGACTACGTNCT
AACATATGCAGGAGGAGAAACATAGGCGAAGCATGGAGTGGGATTTNTNG
TNCATCCCGANACATCTAACTNNATATTAGACATACATTATCACTCAGAN
AGAATTATNACTTTGAAAATTAAAAGAGGAGAACAAGCTGAAACGTNTAT
NCAGATATATGCACCGTGCAATGATAATTATACNGAAGAGGANAAAGATG
AATTCTTTGACGANCTGNCTGACGAGATNAAGAAAGTTAAGGAGAGCAGC
ACACTATATGTAATGGGNGACTTTAACGGNAGGGTAGGAAATAACAGAAG
ANAATGCGAAAGATACCTAGGCCCACATGCAGCGAACAACAGCGNTAGAA
ATGGAAATGGTCAAAGAATGTTGGATCTATGCAGCCAGCACGATCTTTTT
ATTACCAACACATTCTTTCAACATAGAGATTCACAAGTTTANACGTGGTA
CAAATGGAACGATCCAGATCAAGAGCCAGATTGACTTTATACTTACCAGA
GTCAAGGAAGAAGGAGAATTCTTGATTCAAGAGCNATCCCNAATGGTCTA
CGTGACACTGACCATAGAATAGTTGTGTTAACAGCAAAACATCTTACGTT
AAAGAAACACAGAAAGAAATTAAACAAAAACAAGGATCTCATCAAGATAG
CAAATCTGAAACAGGAAGGAGTAAAAGAACAGTTACAACAGAAAGTAGAG
ACAGCATTCAAACAACTTCCACATGTAGTCGGCAATATTGAGGAAGAATG
GAGTAAATATAAAAACACTATGCTTAGTATCGCAGAAGAATTATGTGGAA
AACGGAAGAGTGGAAACAGACGGGGAAATAACAAATATTCACCTTGGTGG
TGCGAAGAAGTAAAAGAAGCAGTTAAAAAGAAAAAAGACTTATATAAACA
GTGGATAAAATCAAAGAAAGAAGAAGATTATATAAACTATAGACTGCAAA
GGAGAGAAACCAACAGGAGNGTCAAGAAAGCAAAACAAGAATCCTGGGAA
CGTTTCGGTGAGTCACTAGCAGAAAATGAGAAAACAGCCAGCAGAAAATT
TTTCAAAGTAGTTAAAAATATGCGAAAAAGAGATGAGAGCTACAACCCAA
CNGAAATAATTAATGATAAGACAGGAAGGCCATTGATAGATCCACCCGAG
ATAGCAGAAAGATGGAGGGAATACTTCAATGAGCTCTTTAATCCTCTAGG
AGATCATCAGGAAAGAACAACTGAAGAGCACAGAGCAACAGTGTTAGAAC
CACACATACTAATGGATGAAGTAGAAAAAGTCATTAAACAGTCTCCCAAA
TATAAAGCACCAGGAGCTGATA
>rnd-1_family-579#Unknown ( RepeatScout Family Size = 57, Final Multiple Alignment Size = 57, Localized to 1000 out of 1011 contigs )
TCAAGGAAAACTNGTTAAAATATATCCAAAATGAATCACAAATGAATATG
AACCACTTAGTAATGTATAAGTAAAATATAAACTCAATCTGTACATTAGA
TTTTGTTCCAGAGAATCTTTTGAAGCATCATAACAGAGCACCATTATTTG
GTAAAGAAAANTGACTTCCAAAAACAATAAGTATCTTCACACAAAACGAA
GTTTATATAACACTCAATTTGCCCGTAATTTTGTAGCTATGTTCCTAAAT
AATAAGGGGAATAGCACTAGAACTAACTGACACTGAAGAAAATCGCCTTT
TCACTAATGTTTATTCTATTTGTGCCAGCTGACTTTGCTATCGTTGTACC
CTTCGCGTGAGGTACACATTAGACATATCCCTCATCAAAGTTTGACTCTA
TAAATGACTGAAACANGTCTACTTCGCAACNTTATCTATCTAACTTCGGA
TAAATCTGATAAACACGTGCTTTATTTAAATTTGAGGCTTCTAAAGCCGT
AAATCATGTTGGCATGCACGTAGAATACTGCT
>rnd-1_family-572#Unknown ( RepeatScout Family Size = 58, Final Multiple Alignment Size = 57, Localized to 1000 out of 1011 contigs )
AGGAAACACCAAAAAGAAAAGGNAAGAAATGCACAGCTAACAACAGGGTA
GAGGACGAGCGGTCTGACTCGGAAGGAAGCATTAAGCCCAGAGA
>rnd-1_family-575#Unknown ( RepeatScout Family Size = 57, Final Multiple Alignment Size = 56, Localized to 1000 out of 1011 contigs )
AACCAAACAGAGAAATCGAATGGATGTTATTGCAGCGCTTCGTCTATCAG
AAACAACGCTCCAGCCACGTA
>rnd-1_family-580#DNA/TcMar-Tc1 ( RepeatScout Family Size = 56, Final Multiple Alignment Size = 56, Localized to 1000 out of 1011 contigs )
TCGCCACCGCCAAAATCGACTTCTTTGGGCCAACCAACATCGTCCCTGGG
CAGGTGACAATCAGTGGAGACGTGTCTGGTTCAGTGACGAATCTTTCTTT
TTGTTGCAGCGTCATGATAGACGGCGTAGGGTCTACCGTAGACGAAATGA
AGGTTTAGCCCAAAATTGTGTTGATGAAGCTCTGCTGCACGGTGGTGGAG
GTGTAATGGTGTGGGGAATGATCAGTTACAACGGAAGGAGTCAATTGGTG
CACATTGAAGGAAGCTTGAATGCGCAACGATACGTCNATGAAATTCTTCG
ACCACATGTCCTTCCATTTTGGGATGCCAACAGATATCTTTTTCAACAGG
ACAACGCCAGACCCCATTCTGCACGGCTGACCACGCAGTTCCTGGCTGCC
AATAACATTCAAACCCTTCCCTGGCCATCCCTGTCTGCAGACATGAGTCC
GATTGAGCACCTGTGGGATGAGCTGCAAAGACGTGTTTGTCGCCGAGACG
TTGCTCCAGCCAATGGTCGTGATCTGTTCCAGGCACTCCAGGAAGAGTGG
GCAGCCATCCCACAGGCCCACATCAGACATCTGATCGCATCCATGCCCAG
GAGATGCCAGTCACTGATCCACGCAAGAGGAGGCCACACACCATACTA
>rnd-1_family-581#DNA/TcMar-Tigger ( RepeatScout Family Size = 56, Final Multiple Alignment Size = 56, Localized to 1000 out of 1011 contigs )
CCCAACAAAGCCCAAACAAGCCGTAATAGCATTGTCTGGAATGACCAGAC
AATGTCACATTTCCGAAACATCCCGAGGAGAAGGCAGAAGCAAAGTTCTT
TGGACAGATTTTTAGTAAAAGTCAAACCTGATGAGCCTCAACCAGGTCCA
AGTAGNGAAAAGAGACAGAAAAAAA
>rnd-1_family-582#Unknown ( RepeatScout Family Size = 55, Final Multiple Alignment Size = 55, Localized to 1000 out of 1011 contigs )
AACTTGACAATGTGATTTATGCATTTCAGCAGGAAAGGATTCATTTTGTG
CTTCATTATATGTTGATTTAACTCTGTAGTAA
>rnd-1_family-583#LINE/RTE-BovB ( RepeatScout Family Size = 55, Final Multiple Alignment Size = 55, Localized to 1000 out of 1011 contigs )
ACAAGTCTGCTGGACGTCAAAACCAAATTAAGAATTGGCTTCTGGAATGT
NAGAACCNTGTNTGAAACGGGNAAAACCGCCCAAGTAGTTAANGAAATGA
AGNACTATAAAATGCGTATTCTTGGAATTAGTGAAAGCAGGTGGACTGGG
NCGGGACAATCCACAACGGGTACGGGAGAAACTATNNTGTACTCNGGAAG
AGATGANAACCCACATNCTGCAGGAGTGGCACTTATTTTAAAGAAAGGCA
NACACGAGCATCTNATAGAATGGNATCCAGTNAGTGANAGAATNATAACA
GCACGNTTCAACGGCAAACATGCGAACTTACGGTCATNCAGTGCTACGCA
CCGACNAACGAAGCTGAAGACGAAGNTAAAGAAGCATTTTATACGAGACT
GCAAGANGTAGTAAATAAAGTACCAGCCCATGATATTCTATGCATNATGG
GAGATTTNAATGCNAAGGTAGGTAACAGACAACTTGAATAGAGAACTATT
AATGGGAAATCAAGGATTGGTAATGAATGAAAACGGGGGAAAGACTGANC
GACTTCTGCGCGGCGAATAGACTTGTTATNGGAGGAACACTATTTCCTCA
TAAGAACATACACAAGNTNACATGGANATCCCCAGACGGAAGAGATGTAA
ACCAGATCGACCACNTCATGGTAAACAGAAAATGGCGTGGGTCCCTACNC
GATGTTAGGGCGTGTCAAAAGGGGAGCNGATGTGGGNAGCGATCATCACC
TTGTAGTCGCTNNACTACGACTTAAACTCAAAAAAGTTTACACGCAAGTT
AAGACACAGACAGCACGNTACAATGTNAACCTTTTAAGAGAAAAAGACAT
TGCCACTAAATTTATAGTAGAACTCAAGAATAGATTTCAAAC
>rnd-1_family-584#Unknown ( RepeatScout Family Size = 55, Final Multiple Alignment Size = 55, Localized to 1000 out of 1011 contigs )
TGTAATGAAATATAGGCAGAAAGGGGTTAAATGAACAAGCATACATTTCA
GACCACCACACGGCGTACTAATCCATCACTGTGTGANATGACAGAAATGG
GTGATTAGAAAGCCATGGCCTAGCCAGCTATGCAGAACACACCGCCATGA
CATCTGACAGTGAGGGATGAAACATTCGACGAGTGCCCGTGAACTGTGAC
CAGCTGANGAGATACGTTCATCCAAACGTGACCACCAAAGACAGGTGACA
GGGGAGTGATTGAGAAGGCACGCCAGAAAGAGCGGGAAAGCGGGGGAATA
AAGTCAGNGCCGGAGCGCTNGAGAAGACAGTTAGCCCCGGAACCGCTTGA
GAGGACAGTTAGGGCCGGACCGCTNGAGAGACCGGTTAG
>rnd-1_family-585#Unknown ( RepeatScout Family Size = 54, Final Multiple Alignment Size = 54, Localized to 1000 out of 1011 contigs )
TATAATTAAAGAGTTGAAAGGTAATANAGGCGAAGAGTAGTGCAAGGGGT
ACTGAAGAGTTACTTCCTCCTTTTTAAGGACTTCCTGTTCCCTTTTCAAT
TCAGAAATTGACCGGTTCAGACCTAAAGTTGTTAGTCNGCCTGTGGTCCA
ATTNTCTGTTTGAATTCCCTGCCAGGGGTGAGTTAAAAGAATAAGTTTAA
TTTGATGTATTGCTGCTTATTCCTCTGAATTAATTCCACAGGTTAAATTC
TGAAATTTGATGCCCACATGGCTCAAAAACTATGATAAATTTCTTTATCC
TCACTAACCACGTTTATGATCTAGTATGTACATGTATGCAAACATATGAT
CTATTTGATGATTGAANTAATGTTTATTTGNTACTAGAAACGTGCATTGG
TATTTTTAATTATTATANTTATATTAATTAAGTGATAATTATGTCCTCAT
GTGAAATCTCGGCCAGTTCCGGTTTCCAGCATGGTGGGACAATTAAAAAA
AGGAATGAAGTGTATATTCATTATACCTAATCCCTNCTAAGTTGATTTTA
CCTCATGGTGATATTAGCTTGATAAATCACTGTCTTGCTTTAATTTAGAT
TTAGTCCAGATAATTCTGAGACTGGTTTAAGAGCTTGGAAAGTGAATAAC
ACAGTGAGGCTGAATTTAATATTCACACTGTCAGAGAAGAAGAAGAGAAA
AGAGATGTATGGCCCATGCTTGTAATTATTATTGTTGTANATATATTTCC
CCATTACTAGGAATACATTTCAGTNCTACAGCAGGTGGCCTTACAATTGT
AATAATTATATTTCACCCCTTCACAACTTCTAAACTCTGCTGAATAAGAT
TAGCACACGTGTGGATTTAGATTTAAACTGGAGTGAGTGTTGTATATTTT
ATGTTAATACTGTGACAGATGGAAAGCCCATTGTCATCTATGATTGTATT
TTGACATCTATCCCAGCACCCAGTATATTGATGGAGATATGTCAATCCCA
TTTATTTTCAAACAGTGCAAAGCACCTGTTATGAGTTTCTGGCCTTGGTA
AACTCACTCCCTGNTTCTCATTCNTTGTGATGTGAACCCATGTGGTTAAA
ATGAGAATATTGTGAAATATGACTGTGTATGTCTGTGTGTGTAAGCATGT
TAACCCTTCAAAGGAGTACTAGTGTGCAGACATCAGAACAATTTACACTG
AGGAATGTCCTTTCTTTTTGTGTGATGTAAACTCTTGTTCTTGAGAGTAT
TCATGAAACTGGTTTCCTAAATATTTCCCCATCAGGATTATGGACCATGT
TCTGTACACATTCCCATTCTATACCAGTAGAATGTGAACACCTGTTACTA
TCCTACTCCATATATATGTGTGTAGTGTAACAGTTTAAAGACTGGAGGTA
TTGTTGTCTCCAGTTAGAACCTTCCCGACTGTTTGTATAAGGACTGTTCT
ATTGTTCTAGTTCCAGATGGTAGTTCCAGATGGTAGTTCCAGGTGGTAGT
TCCAGATGGTAGATCCCAAGCTTAGCTGCAGATGCCCGATTGTCTGGACT
GGACTGGAAGATTCGGCCTGCCTGATGTGTCTCCGAGGCTTAGCCAGAAG
CTGACCAAAGAAACCTAAGCTACAGCTAAGTGGACAGATTTGTCCACTAA
CCTTTTATAACAGGATTTTATATCCACAGCCATTTAGTTATCATTTGAAT
TTTATTGATTTCAAAATCAATAAATGTTAGTTTTAATGTTCCTACAGTTT
TATGGAGTTTCATTTTAACTGTAATCATTGTGTCAGTGAACAAGCTTAAG
TACATTTAAATATACAATTTTAATAACAGTAGGGAATNAGATGTGGGCAA
ACCCCGAATCCTCTCATTTAACCAGCAAGGCTGGGGNTAATATAAGACTT
TATGATGNTTCACTGTTTGTAATTCCCTCTGTAAATTGCACATAGTGCAT
TCGCTAGTGTAAAGCGAANTTACCCGCCACA
>rnd-1_family-586#Unknown ( RepeatScout Family Size = 54, Final Multiple Alignment Size = 54, Localized to 1000 out of 1011 contigs )
ACATCAGTGTACACAGATCATTGATTACTTCCAGTCATATATTGACAAGT
GAAGTCA
>rnd-1_family-587#Unknown ( RepeatScout Family Size = 54, Final Multiple Alignment Size = 54, Localized to 1000 out of 1011 contigs )
ATGCTAGTTATAATTGAATTCTCCGTCCAATTTTACATTTGCGTATAAAA
TTTCTTTCTCGTCNGTGGCTGTTTAGATTTACAGTGACATTTTTCAGGCA
ATCGCATGCGGCTGAGTGGCTGAGTCTCATTGCCTGCCATCTTGTCCAAT
GACAGTCCAATGTCAACAAAGCCGANACAGAACTGCGCAGTNGGTTGCGC
AGAGAAAAACTTCTTGTTTCTGGGTCGCAAGTTTTAGCGGCTGTTTCTTA
CATCTCATCTCCACAAAAACCTACATATCTCAGCTCAGAANCGACATACA
GGCCTAAATGAGGTACCGTTGGAAAGAGATTGTTTACAGCTATCTAACTG
TGCTGGTTTTATTGGTGTAGAGGGCATTTTAAAAATTTGACTGAAGTANC
TA
>rnd-1_family-588#Unknown ( RepeatScout Family Size = 54, Final Multiple Alignment Size = 54, Localized to 1000 out of 1011 contigs )
TCCGACATTGATAGGGAATGGATGACGGTTGAGAACTTGGCTTATGTTGA
CCGTTCTCGTCGCCGTTTCTCCTCCAGTTTCNACGTTGCAAGATTGTGGA
AGTCTACGGTTTCGCTGCCTGAGCTACTGAGTTTAGTGCTTGGTGCAGCA
CTGTGAGCTGTGTTTNTCGGTTATTGACTGAGTTCCAGATTCGTACATAA
TGGCAATGATGGGTGATGTATTTTTCTTCGTTGTGTTCCTGGGACAAGGC
GTGTGCTATAGCTGCTATTTATTTGCTGGCCGTGGCTGCAACTTGGCCGA
GGACATGTGGAGAATGGTCAGGAATAGTTTTAATCTACTCATCGCCCAGC
TATTCGTCGAATGAAGTTGATTTTCAGCGATGACGCCTGGTCTCGCAGTG
TGTTTAAGGAGGCATGCACCTTATGGTTTGCCAGATCAAATCGTGTGT
>rnd-1_family-589#Unknown ( RepeatScout Family Size = 53, Final Multiple Alignment Size = 53, Localized to 1000 out of 1011 contigs )
AACTGCCGCCTGGCTTCTAGTGCTGTCTGGTACTAACGGCTTGATCGTCG
ACTCTAACATCTCAATAGTGTTCCTACCTAATGTGTCTCTGTTGACCATG
GATCCATGTATCTTGTGTGTCGTCTCTGTAGCTCGATGTCTCGTTTCATG
TCTCCTCTCTAGTGACTGTCTTCGAGGCTCCATGTGACTGGTTCCTCTNC
TTCTAGTGTTGAGCTGGCATCTCCACAACTGCGAGGGTCNATGNGACTAG
TCCCTCNTCTTCTGAGTCTCGACGACTGAAGGCTTCTTGTAGTTGAGCTG
ACATCTCTACGACTGAAGGCTGCTTTGAGGGTCCATGTGACTGGTCCCTC
CTCTTCTAAGTCTCGTGGACTGAAGGATTGCTNAAGTGGTTTCTTACCCA
CTATTTATACTNAGATGCTGGAATGCTAGGTATTTGTTTTCTNCTCGCTT
TGNCTGCTTCTAGAATATTCTAGTACGCCTAAACTTGTTTACT
>rnd-1_family-590#DNA/TcMar-Tigger ( RepeatScout Family Size = 53, Final Multiple Alignment Size = 53, Localized to 1000 out of 1011 contigs )
AACACACAGAATTTCAGATTCCTGAAGTTTTATTGGAAGGGGACTCTCCT
TCCAAACAATAACATCTCCTCCTCC
>rnd-1_family-570#Unknown ( RepeatScout Family Size = 58, Final Multiple Alignment Size = 53, Localized to 1000 out of 1011 contigs )
GTCAGGTCTTGTGCTGCAGCNTCCCAGGTGTCAGGTCTTGTGCTGCAGCC
TCCCAGGTGTCAGGTCTTGTGT
>rnd-1_family-593#Unknown ( RepeatScout Family Size = 53, Final Multiple Alignment Size = 53, Localized to 1000 out of 1011 contigs )
TCTGTCACAGACCTCTGGGTGACCTTGNTGGTCCGTGGCTCGTAACTGGG
CCTATGACAGACAAACTAACCTTCGACACACACTGAACCCGAACGCACAC
AGAGCACACACGACAATCTTTANTGNAAGTACAGGTAATACAATAGACAG
TTGACTTCCCGCTGTGTGGCCACCTATTGCCTGGACCCTCTGGCCGAACG
AGCTTTACAATCGCCTCGCTCTCCAGTNCGTTCCACAGGCAATCTCCTGG
TGCACAAACCACAGCCCGGCGAGATACGCTCTTTCCTATCGCCACGCTGA
CCAACCAAGATGTCACAGCCTCTGTCTAGTGCAGGGTCAGNGTGNCAAGG
TTAGACATTCTCTCACAGAACATGTACNTAAACGCTCTAACTGGTCANAA
GTAACTGGACCCTATTTACTTCTTGTGACAACACAANACTTGTACCAGTT
AAACTACGCAGCACAAAAGACTATCCTATTCTAACAGAACACTGTAAATA
ATCTATGCAGTCACTAA
>rnd-1_family-594#Unknown ( RepeatScout Family Size = 53, Final Multiple Alignment Size = 53, Localized to 1000 out of 1011 contigs )
TTAAAGTGGTTTCTTACCCACTATTTATACTNAGATGCTGGAATGCTAGG
TATTTGTTTTCTTCTCGCTTTGACTGCTTCTAGAATATTCTAGTACGTCT
AAACTTGTTTACTATGTACGTTCTCACGTGGGATTTTCTAATTACGTCTC
GATTGCATCAGATTTCATCATCCTATTCTGCGCCAAATATAGTAATTAAA
TTGACAGCTGACCTCATAGAGGCTTCTAGAAAAGCAAGTACNACTGCGTT
CGCTTTGATAGGGCACGTCAACAAGGTATTCACTAGTACGACAAGGTTGG
GTCACATGATGAAAAGAATGCATTTCAAAACTTCTAGAAAGAAGGCCAAG
GCCAGACAACATCAGTTTGACGTCAATAGCTNGTTTTGGCGAGAAAAGAA
GGTTCTAGAAAAGGGAATGTCAAGGTTGCCAAAACTTGTTGATTTTCGGT
NCACCTTAACTNTGCGCAATATCCTACCTCCTGACAAACAAGTGATGACG
TCNCCCTGTTACA
>rnd-1_family-595#Unknown ( RepeatScout Family Size = 53, Final Multiple Alignment Size = 53, Localized to 1000 out of 1011 contigs )
ATCGATCAGTTTGTCCCCTCCGGGCTGCTACCTAAAGGTTTACCATACCA
T
>rnd-1_family-597#DNA/TcMar-Mariner ( RepeatScout Family Size = 53, Final Multiple Alignment Size = 53, Localized to 1000 out of 1011 contigs )
AAGAGGTGACAATGTGAATGCTGATTCATACTGTAAAGTTCTATCGATGC
TTCATGATGCAATTCGAAGAAAACGTCCAGGCCTGCTGACTAGAGGAGTA
CTGCTCCTTCATGACAATGCCAGACCACATACGGCTCGGTTAACTCAGGA
GAAAATTAACCATCTAGGGTGGGAACTTCTGGAACATCCACCTTACAGCC
CCGACTTAGCCCCTAGCGATTTCCACCTTTTTGGTCCACTGAAAACCCAC
CTTGG
>rnd-1_family-598#DNA/hAT-Blackjack ( RepeatScout Family Size = 53, Final Multiple Alignment Size = 53, Localized to 1000 out of 1011 contigs )
TACACCAAGAATTGTCCATGCACCAGAAAAGTCTTAAGAACAGACTGTAT
GACGTCAATGAGCAGAAAAAATATTCATCACGTTGACTTTGGTATTAAAT
TCCTAACGGAATGTAATGCGTTCCTACAGAAGAATAACGGGACTGAAGTT
CAGATAGAAATAAACAATGTTAANGAAAGATGCATGTCTGTGCTAGAGGA
AGCTCTCAATCAAATTACGTGTAGACTTCCCACCGAGAATATATTTCAAA
ATCTGTCAAAATTGAGCCCTTTGGCAGTTTTAAATCAAATATCAAGGACA
CAGTTTTCAGAGCTACCATTTTTACACCTGGCAGAAAACAACATCAGTAT
TATAGAAGAACAGTACAGAAAACTGATTGTTGTCAACTGGAAAGAAGAAG
CTACATTTAAGAAGGATGGACTACCTACAAACAGGGAAGATTTTTGGATA
GGCGTACTTCGACACCAGGCATTTAAAGAGTTGGCCACTTTCGCCCTTAC
TTGCTTAATAATGCCCGTTAGCAATGCTGTAGTTGAGAGAATATTCTCTC
TTGTTACTTCAACTAAATCAAAAGCAAGAAACAAAATACAACTGGATTTT
CTTGATGCAGTTGTCAGAATTAGAGCAGAACTATTGATATCAAAGAAATG
TTGCAAAGACTTCATCCCATCTGAGAAAATGCTTAAAGATTTTACATCCG
AAAAGGTTTACGCTGTATCTTCCACTGGTTCCAGTGAGGATGACAGTGAA
GAATTCAATCTAGAGCTTTTGATGTGAAGTGAGTACAATGTTACACTTTA
TTTGGCATTTTCTGGCATATTTTGGGTAATGGTTTGGCATAAAATGAAGT
TTTTTATCTGGCAACCCTG
>rnd-1_family-599#Unknown ( RepeatScout Family Size = 52, Final Multiple Alignment Size = 52, Localized to 1000 out of 1011 contigs )
TTGGAGTTGTCTAGCATCTTCTTCTTCTTCAAGTTGCCGTATTCTCTCTT
CTTCTTCCCTCTCCGCTGCATGACGAGCAAGCATCGAGTCCCATTCTTCC
TGTTCGCGTTGTATGAACGTTGTTAACTCTTGTCCTCTATAGCCCCTTTG
TGCACCAAAAATCCTTGCATTTTCTAAGAACCTGGACCGGCGGTCCATAA
TGTCTAGATTGTTCATTTACAAAGCAAGAGAAACTGATCACATGCAGGAC
TAACCAGAAGAGTATTTATAGTTGAAGGGTTGGGTGATAGAATAGAAAAA
AAGGAAAACTGACCACAGCAGTAAGGAGAACGTTACTGAAAATAATGCAA
GTAATCAAACATTACTGCACAGCAATCAATGACACATTAAATAAACTTAA
CAGTAATNTCAAATGATANGATGTCAGCATGNAATATGNTCTACAATCNA
TATCAAATGCTAAATATGCAGGCAAGATTGGGAAAAAATCATCAATTCAT
CAGACTACTNACTAAGCGCTATAGATTAAACACTAATCAANGTTCATGAA
GTGTTCAATGATAGACAGTTAACTCATATGATTTCATCNATCANTTACTT
TTACAGTTATTATANTGCCANTCTTCAAACCCCAGTTACGCAAGTCACTA
TTATAAAGTATGGTGCCTNTAGTCTAGGGACTGGAAAAGTTTTTGAAGTA
NTTAAAATGAAATCTATGAAATNAAACTTCNNTTTCGTTAGTCTAGGGTC
TGCCGGGTTTTAGATCGCNGGCGGGACGCCACTTGTGTCAGGTTNTNATT
CCGGAGAGCGCCNCACTTGTCGTGGAACAGGTTCCTTTTACACTCACTAA
AGTGGTGTTATCTTGTTAGAAACCGAGACAACTGTCTTTTGGTGCAAAGA
GCAGACAGTGTCCCTGGATACCCAGGAANACAGACTCGAATTGGCTCGCG
AAAGAANGTNAGCTGCACTNGGTACCCACAGGAGAGGGAAAGGGANTTTA
GATGTCTAAACACTTAGACAGGGCAGATGACCCCTCCCGACAATTTCCCT
TTCTGGTANTAAAATTAAGCCCCCATCTAGACTATGTATATTGGTAGACA
GCACTGACACCATACATACATCTAGAAATAGAAATAAACTTTAACTATGA
GTTTAAATCAATCATAGGAATGTTTATTAAAATTAAAGTAAAATTCAATC
ATCTATTTACTTTTGAAAATACATTATTCAAACTAAGTAGGATGAAAGAT
AAAAATGATAGTAACATGAAACTGTCGTCATGAGAGGATCAGTGGGAAAT
AACATACAACAATTACCACCTGGAGTTTCCCAGAGGATCATCCATTTCAA
AGACTGAGGTGGAATGTCGGATCTGTCCCAAGCACCAAGATCTTCCTTAG
GGCACTCCAATCATTAGCTACGACCAGCCTGGCAGTGGTTTGGAAGCTCG
TCCTGCCACAAGGAATCTGTCCTCGGCTTTTCAGCAGCTGGATTTAGATG
TAACTATATGGTCATGTTGCTAGGGTTTTTAGGCGGCGAGAAAGACAAAG
TTCTGCCAAAACGGCCCGCTCTAACACCTGCTTGCTGACCTGAAGTAAAA
TGGCTGGCAATCTTGTCTCACTGCGGGATTTCCGGTGTTGGCCAGGGTTT
TCCCGCTACGTTGCCGAGTTACTAGCCGTATATTTTTATACGTGAAAGCT
CAGGGGAATTACAAGTAGGACAATGGAAAATCCCCAAACAGCAACCGTAG
GCTATAACCGGGATATCTCTCAATGCGTCTTATGACGAAAATGAAGTCAC
TGGGCGCATGTAAGAGAGAAAAATAGAAGGGTCACAAAGGGGTGGTACGT
CAGCCAAAAGTATCTTGTCTACTTGAAGCGGCGTCTCGCGACAGAA
>rnd-1_family-592#Unknown ( RepeatScout Family Size = 53, Final Multiple Alignment Size = 52, Localized to 1000 out of 1011 contigs )
TGATCTGGGTCTTATCAAGTGATGCAAGCCACTCTGCGCGCAGGACGCCA
GTTT
>rnd-1_family-600#Unknown ( RepeatScout Family Size = 52, Final Multiple Alignment Size = 52, Localized to 1000 out of 1011 contigs )
AAAAAATATTCAAAGGGATATAACTCCAGCGAAAGTTTACTTTTACTGAT
TGTCGCAATAAATAAAGAAATGCACAATAACCTNGGCCGCCAATGTGACT
GTTAAATTAAACATTGTAGCCATAATGGCAANTGAAAATTTAACCCGTGT
ATTGGTCACGGTTTGGGAGGAGTTAACACTTCATTTATAATAAACACACG
AAATACA
>rnd-1_family-601#Unknown ( RepeatScout Family Size = 52, Final Multiple Alignment Size = 52, Localized to 1000 out of 1011 contigs )
GGTTAGGGCTAGTGTTAAATGAATAGCGACTACTACTAACCCTAACCCTA
ACCCCC
>rnd-1_family-602#Unknown ( RepeatScout Family Size = 52, Final Multiple Alignment Size = 52, Localized to 1000 out of 1011 contigs )
GCTAGAACGGACAGTTAGCCCCGGAACCGCTTGAGAGGACAGTTAGGGCC
GGACCGCTNGAGAGACCGGTTAGGAGAAAACTAGTGCTGTACTTCGTTTA
GAAGGTATATGTTAAACTTGGAGTTTAGCTAGAACAGTGGTTAAGGAACT
CGTAGAGAGACATACGAATAGCCAGTAATAAGATATGAAGTGTTCNTATA
CTATTGNTTATTGAATTTATGAANTCTGTNTGACGAGAATATTGTNAATA
AACCAACTCTTGTGTAATTGTTACATCACTGGCCTTGTTCTTGAGTACGA
TTGAAGAGAGCTACGAACTATATCCATTCCACTTGGCCGAATTAGGCACA
TCTATTTCTTGGGGGATGTANAGGCACGACTGTGCCACA
>rnd-1_family-596#Unknown ( RepeatScout Family Size = 53, Final Multiple Alignment Size = 52, Localized to 1000 out of 1011 contigs )
TTTGTGCGCGTCTTTTCCATTCCCTCCGTTGAGCTTTCTAGTCACATTTT
GTGTTGTATTTA
>rnd-1_family-603#Unknown ( RepeatScout Family Size = 52, Final Multiple Alignment Size = 52, Localized to 1000 out of 1011 contigs )
ATGACATAATTACTGTGTGTTGGCGATAGACAGCGTGCAGTGCCCTGCTG
TCATCATACGGTTAGGGTTAGGGTT
>rnd-1_family-604#Unknown ( RepeatScout Family Size = 51, Final Multiple Alignment Size = 51, Localized to 1000 out of 1011 contigs )
CAAAGTTCTGAATCCCCAGTCTTGAATTTCTTGTACATATGGCTGCAGAG
TCTGTTGTGTCCAGT
>rnd-1_family-510#LINE/RTE-BovB ( RepeatScout Family Size = 76, Final Multiple Alignment Size = 51, Localized to 1000 out of 1011 contigs )
TCTGGAAATCCAACAATTACTGCAGAGGAACGAAACTCCGACTCTACAAG
AGCATCATTTTGCCAGTTCTTCTTTATGGAGCGGAATGCTGGAGAATGAC
CAAAAAG
>rnd-1_family-605#DNA/hAT-Blackjack ( RepeatScout Family Size = 51, Final Multiple Alignment Size = 51, Localized to 1000 out of 1011 contigs )
CAGGGTTGCCATATTGGCATTTTTTATGCCAGATTCCACAAATCTGGCAT
ATTTGAAATTGAACTGGCATAAGATAATGAACTGGCATATTTTGGCATAT
TTGGGTTTTTCCTGGCTTTTCTTATCAAGATGTGCTCACATTTTCTTCAT
GGTTCCTCCGTTAGAAACACGCAGATTTACTAAAAGCAATGTAGACCTAC
AGTTAACATCTTTATTTCAGTTTGACTTTGTTGTGATGTCCT
>rnd-1_family-606#Unknown ( RepeatScout Family Size = 51, Final Multiple Alignment Size = 51, Localized to 1000 out of 1011 contigs )
TTGATTATTGGGGATCCGTTTCAAATCCAGTCGATGTAGATAGCTGGGTC
ATATGGTCAGTCTTGCTCACGGCCAGAAGTACACGTGTCCGCCGGCGTGC
CGCGAAGATAACCCAGCTCATATAACTCACACGTTTCAAAGTNATCCTTA
CTATTACTCCTTGAAAGAAACTCCATTAATTCTTCATCAACTTTAAACAA
GTTTTCTTGCCATTTTGTATTTAAAAAAANGTAGACTAACGCAAAACCAG
AAATATATTTCAGGGCAAAAAATNCACAGTTCACCGACCACGCTTCCACG
GTAACAAAGCAACAGGATAACGCGGAACGCATCTAAATACGCCTAAACGC
ACGTGACAAGGGTTTTAATCGTATGTAAATGGGTCAGTTTGATCAGATTN
AGGTAATGTGTATTGCCATTTCACCCCCGAGAATTACCGTCCTTAGCAAT
CTGTAAGAAAAGTCGAAGACGAGTTANCTCGTCCTTAGCAGTGAGGGCAC
AGAAAACGGAAGACGAGTTANCTCGTCCTTAGCAG
>rnd-1_family-607#Unknown ( RepeatScout Family Size = 51, Final Multiple Alignment Size = 51, Localized to 1000 out of 1011 contigs )
TTAACTCTTTCAGGCCCATGAATTTTGACAGACTTGGCCCACATTAATTT
CCCTTTACAAAAATGGCAGAGGGGTGGGTGTACAAGAAAGGCAATAGAGA
ATGTAATATACTTCTAATCCCTATAAAAGTATATATTTTTTTAAAGAGAA
ATGAATGTACATTTTGAATCTGATGATAAGTGTTTGTTTAATNCTGTTAT
AGTTAGTAGGAAAGAAGAATTCAGCAGGTGTTAATTTCACAAAGACAACA
TTTTACAAAAAAATTCTTCACTTACCATGGTTTTGCAGCCACAAGAGCAG
TGAATATCCAAATTTGAGAACAAAACTTCAAAGTTTGTTCAATTTCCTAA
CAAATTCNAAAGTTATGATAAGTTTCTGGGTTAGTTTANCACTCAGGGGC
TCTTAGTTCTCACAGAGTGCTGAGCAAAATTTCAGAGAAAAAATGGCAGA
AAAATGAGCCATTACACACACACTATTTACTATTCACTTTGTACAGTTAT
ATACAGACTGTAGCTGCGATGATTTCAATGTAGCTTAGCCATAGTATAGT
ACTGTCTCTTTGTTTAGAGCACTTTCCTTCTCTTACACCATAAATACGGT
AGCATGGGACATTGTCTGTGTAATAAACTCATCAGAATCGCTAGATTCCG
AACAGCTGATCGCTCAGCTTCGCTGGTGAAAATTCACCGTCCGAATCACT
TTCCGAAAAATCTAAATTTT
>rnd-1_family-610#Unknown ( RepeatScout Family Size = 51, Final Multiple Alignment Size = 51, Localized to 1000 out of 1011 contigs )
TGTCGCGTGCGGATGTGCACTAGAACGCACCGGTACTGAGTGAGCAAATA
GGACGTCAAAACAATACGTAACGTTGTTAAGGNATTGTTGTCAAAGGCAG
TCGATGTTTACAGTCCGAAGGAGACGGACGTGTGGATCCTTGAGGACGCT
TTACCCCGGGATNCCACGGAAGCAAACGTTGTATAAAGTTGGATCCTTGA
GGACGTTTTACCCCGGGACTCCAATATAGACCTCAGCAGGAAGCTGGTAC
ATTGTCACAGTTCGGCAGTAAGCCGGTATACTTTCATTACTTNATTCAGA
CTGCGGAACCGAAGACCGAGATGACCGTCCGGATCTCAAGGTCGGACTGC
GACCCGTCGTGAGGACATATCAGTCCATGGATGTACGAGCGGGCTTTTGT
TGACGTGNTTGAACGAGTCTGGATTATTAATTGCATATTTTCTCCTTGTG
TTGAT
>rnd-1_family-611#Unknown ( RepeatScout Family Size = 50, Final Multiple Alignment Size = 50, Localized to 1000 out of 1011 contigs )
TGTGACGAGCTGGTCTGGACAGCTGTTTCTGCCCTTTTAAGAAGTGCTTT
GTTTAGATAATATTATTACCAAANTTCTAAACATTTTCCTATTGCTTTTT
ATTAGCATAATAACACTGATTAATTAAGAAATTTCCTTACCTTTTTCTTA
ATGCTTTATTGTAGCAAAATTATAATTAAAGAGTTGAAAGGTAATAAAGG
CGAAGAGTAGTGCAAGGGGNACTNAAGAGTTACTTCCTCCTTTTTAAGGA
CTTCCTGTTCCCTTTTCAATTCAGAAATTGACCGGTTCAGACTAAAGTTG
TTAGTCTGCCTGTGGTCCAATTTTCTGTTTGAATTCCCTGCCAGGGGTGA
GTTAAAAGAATAAGTTTAATTTGATGTATTGCTGCTTATTCCTCTGAATT
AATTCCACAGGTTAAATTCTGAAATTTGATGCCCACATGGCTCAAAAACT
ATGATAAATTTCTTTATCCTCACTAACCACGTTTATGATCTAGTATGTAC
ATGTATGCAAACATATNATCTATTTGATGATTGAANTAATGTTTATTTGN
TACTAGAAACGTGCATTGGTATTTTTAATTATTATANTTATATTAATTAA
GTGATAATTATGTCCTCATGTGAAATCTCGGCCAGTTCCGGTTTCCAGCA
TGGTGGGACAATTAAAAAAGGAATGAAGTGTATATTCATTATACCTAATC
CCTNCTAAGTTGATTTTTACCTCATGGTGATATTAGCTTGATAAATCACT
GTCTTGCTTTAATTTAGATTTAGTCCAGATAATTCTGAGACTGGTTTAAG
AGCTTGGAAAGTGAATAACACAGTGAGGCTGAATTTAATATTCACACTGT
CAGAGAAGAAGAAGAGAAAAGAGATGTATGGCCCATGCTTGTAATTATTA
TTGTTGTANATATATTTCCCCATTACTAGGAATACATTTCAGTNCTACAG
CAGGTGGCCTTACAATTGTAATAATTATATTTCACCCTTCNCAACTTCTA
AACTCTGCTGAATAAGATTAGCACACGTGTGGATTTAGATTTAAACTGGA
GTGAGTGTTGTATATTTTATGTTAATACTGTGACAGATGGAAAGCCCATT
GTCATCTATGATTGTATTTTGACATCTATCCCAGCACCCAGTATATTGAT
GGAGATATGTCAATCCCATTTATTTTCAAACAGTGCAAAGCACCTGTTAT
GAGTTTCTGGCCTTGGTAAACTCACTCCCTGNTTCTCATTCNTTGTGATG
TGAACCCATGTGGTTAAAATGAGAATATTGTGAAATATGACTGTGTATGT
CTGTGTGTGTAAGCATGTTAACCCTTCAAAGGAGTACTAGTGTGCAGACA
TCAGAACAATTTACACTGAGGAATGTCCTTTCTTTTTGTGTGATGTAAAC
TCTTGTTCTTGAGAGTATTCATGAAACTGGTTTCCTAAATATTTCCCCAT
CAGGATTATGGACCATGTTCTGTANACATTCCCATTCTATACCAGTAGAA
TGTGAACACCTGTTACTATCCTACTCCATATATATGTGTGTAGTGTAACA
GTTTAAAGACTGGAGGTATTGTTGTCTCCAGTTAGAACCTTCCCGACTGT
TTGTATAAGGACTGTTCTATTGTTCTAGTTCCAGATGGTAGTTCCAGATG
GTAGTTCCAGA
>rnd-1_family-612#Unknown ( RepeatScout Family Size = 50, Final Multiple Alignment Size = 50, Localized to 1000 out of 1011 contigs )
TGTAGCACAGCTCTCTTCTTTGCGTATGTTGATGTCACACCCAGGTTCGT
CTTTAGGTTTGCTACAGGAGGAGTCGATTGGAAGANTATAGACGAGGAGA
AAGATGGTCGTGTCGATAGTGGCGATGATGATGATGTCTTGCTNGCTGCA
TGCTTCTCACGTGACTCTGATGCTTGTATAATAAAATGTCTGGAAACAAC
TGTTCTCGTCTATACTGTCTTTATTGTGATACTTCAGCAATGTCACAAAT
AACATCAATGATATTCTGAATGGCGCTGTGTTCTCTCTATGGTTACATAC
TCTTGAGGTCGCGTTGTGTTCTTCATCTCTAGTTACTTTGTTAACTGGTT
CTAGTGTCTGTAACTGCCACCTGG
>rnd-1_family-613#Unknown ( RepeatScout Family Size = 50, Final Multiple Alignment Size = 50, Localized to 1000 out of 1011 contigs )
TACAGTCGAGTCTGGATAAGNAGAACTCGCAGGGACCCAAGAAAATGCTT
CCNCTTATCAGGANTTCCNCTTATCCAGACAGCACACGCAATAGAGAAAA
TTGCCGGGANTAAGCTGGTCATGTCGACTTAACCGAAATTCGNCNCATCC
GAGNTCGACTTAAGCGGACTCGACTGTAT
>rnd-1_family-614#Unknown ( RepeatScout Family Size = 50, Final Multiple Alignment Size = 50, Localized to 1000 out of 1011 contigs )
TATTTGTTGCTTGGCTGATCTAGACTTTACACAGAAGATNTCCTGTCNGG
GCGAGATACTTCTGNTCTTAGCCCCCGCCTAAACGAACTTTTTCTCTTTT
TTTTTTCTTGTTACTGAGGCAGCTTAAGNNTGGGTTTTGGCTCCCACTCG
CCACGTACATTGTTAGAGCTCTTGTAGGTTCGGAGTCGAGGAGGTTTCAA
GGAGTAGATTTTCATATTATCCTTTATAGTTATCTCTTCCCTTTCCTCCA
TTACAAGATACCCCCTNTGCTTTGCTTCTAGTACANTA
>rnd-1_family-608#Unknown ( RepeatScout Family Size = 51, Final Multiple Alignment Size = 50, Localized to 1000 out of 1011 contigs )
AAACGCCGCTCAGCTTCTTNGTACATTCTGTCAGTTTATTCTGGTCCATT
TATTTCACATGTTCAAACATTATTCACACTTTATCACTCGCGACATATTC
GAACACTAACCATTCGCGCGACATAAAGACNACATCTTCAAATACTACAA
CCGTCTTCTCTGACTTCTGATGATCGACTGACCACGAGNCTAGCTCGGGC
TTTCCC
>rnd-1_family-615#Unknown ( RepeatScout Family Size = 50, Final Multiple Alignment Size = 50, Localized to 1000 out of 1011 contigs )
TATAGTTCGTTCAACAATTNATAAACACACTTGCAAGCCATTTTCTCGAA
AACTGCCTGTTAGATCGCAACGATTTTTTGCATGCAGCCTTAGAATATCC
ATGACGCAAAAATAGTGGTATTCTTTAGTCCATAGATGCTCAGGATGCTG
AATATCAGCCAATTCCTTTGATCTTTTCGAACCA
>rnd-1_family-609#LINE/I-Jockey ( RepeatScout Family Size = 51, Final Multiple Alignment Size = 50, Localized to 1000 out of 1011 contigs )
GTCGCACCAGCCCCNACGGTGCAGACGATGCCAGCACCGACCGACGCCCC
TGTCGAGACGCCAGCCTCGCCCACCCAGACGCCGCCAGCCGCCGATGNAG
CCCCTGTCGAGGCGCCACCACACCAGAAGCCGCCCCAGTCGTGGCGCAGG
GACCCACCNACACCCGCCCACNCAGGCAGCAGCAGCGACCGGGAGCCACC
AGTCCAGAGATNNTNCAGTGCTCGCGCTGCAACAAGGCGTGGCACACCGC
CGCGACCTGCCGCAGCAGCCCAGCGTGCCGNTACTGCTCCGGNNCGCACG
ACTTCAAGGAGTGCCCCCTGGCNAAGNTGGACACNGACTTCAAGAAGCCN
AACACGAACAGAAGGTGCTCNAACTGCTCAGGNGCCCACAGCGCGAGGTA
CCTGGGNTGCCCGTACCTCAAGNAGATCAAGAGAGAGATGCATAATGCCG
GACCCAGACGCCAGCAGAGATACGAGGCGCCCAGACCGGACACAAGAAGA
AGCCTACCNAGTCGCCCAGNCCAAAACAGAGCACCAGAAAGGAAGGAGAT
CACCGCAAGAGACCCAGAATTGATGAGCGCGCTAACCGAACTGAAAGCCG
AACTNCAGAAGGAGAAGGCCGCCGCCGCCGCCGAGAGAGCGGAGACGCTC
GANCTGATCTCCCTGATGCTNGGGGAGATCAAAGCCCTGAAAGANGACAG
AGCCGCACAAACAAGGCTGAAACCGAATACGCTAACCAAGCGCAAACAAC
CAAAGAGAACATCAANGCNCTANTCGCCAGGCTTGAAAGCAGCCCAGGCA
GCAGACGAGAAGCGCCGNCAGGAAGAAAGGGAGGAGAGAAGGAAGGAGCT
GGCCGAACTAAGNAGTGCACGNGAAGCCGCGTACCGAGAAGTCGCCCNGC
TNGTGCAAGCGAACGCAGAAGCCGAAGCAGCAGCGCAAGCGGCNAAGACA
GAACGNGCCCTGCTGGAGAAAGAAAGAAACGCCGCNAGGAAGCCAAATAC
CAGCAGGGCCGACAAAAGCGCCTNCACTGACAAACTCGNAACGACGAAGC
ACCAGGCACAGATGACCGAGGCACCAGAGCACAGAGACCAGGGCACAGAA
ACGGATAGCTCGGAACCAGACTATGAA
>rnd-1_family-616#Unknown ( RepeatScout Family Size = 49, Final Multiple Alignment Size = 49, Localized to 1000 out of 1011 contigs )
TTAAGGGGTCACTACACCAAAAAATTTTTTTTTTATTTACAGAGTTAGAG
CAGTTATTTTATAATGGTCATTTGTAGGGATACATGTTATTACATTTGTA
TACTTTAAGTGTTAAAAAATCATAGTTGTCATGGCAATAGCCGCCATCTT
GTGAAAAAAACAACATGTACTTAGAATCCTAAAATTTCAAAAACAAACAT
AGGTATTNAANAATAGATGATGGATTCATGACCTTTNATCCTATTTAGAG
GTACAGGTCTAGTTTATTTACTTTAAACATGTTTTTAAATATTTTTCGTA
GAATTTTAAAATGTAGGTTTATTGAAAAAGTCAAAAAAATCTAGCATCAT
AAGACAATAATCAAATTTTAAAAACAAAAACTTTCTAAAATCTACTTTTA
GATAGACCAGTCCCTATAATATTGTTTACGGAGTATNCATACNAAATTTC
ACGTTTCTAGTCTTTATATTAGCTNAGATTTTAGGATTTCACACACACAG
CAAACNGAAATATAGAGATTTGAGAAAACTGACTTTTAAACTTTTTTTTA
TCTTAAAAAAGTGCACGGGGTGGTGTCNTTAGTATTAACTTTTCAATGCT
AAATTGTTTACAAATGACATAAATTTTGTGTGTAATCTATTCTACGAATG
CCGAACTTTACAAAAACGAACACATTGAAAAAGTGATATTTTTGTCATAA
ATTGGAAAAAATGCCGTGTAGTGACCCCTTAA
>rnd-1_family-617#Unknown ( RepeatScout Family Size = 49, Final Multiple Alignment Size = 49, Localized to 1000 out of 1011 contigs )
ATCAAAGAAATGTTGCAAAGACTTCATCCCATCTGAGAAAATGCTTAAAG
ATTTTACATCCGAAAAGGTTTACGCTGTATCTTCCACTGGTTCCAGTGAG
GATGACAGTGAAGAATTCAATCTAGAGCTTTTGATGTGAAGTGAGTACAA
TGTTACACTTTATTTGGCATTTTCTGGCATATTTTGGGTAATGGTTTGGC
ATAAAATGAAGTTTTTTATCTGGCAACCCTG
>rnd-1_family-618#Unknown ( RepeatScout Family Size = 49, Final Multiple Alignment Size = 49, Localized to 1000 out of 1011 contigs )
AACACTATGACAAGACACCCGCCNTTCTGCCGTACGTTCTCCTTTTTACT
ACAGCTCAAACCNTCCCTGAGCGGCCGGCCTTCGCTACCATGACACAGAT
GATG
>rnd-1_family-619#Unknown ( RepeatScout Family Size = 49, Final Multiple Alignment Size = 49, Localized to 1000 out of 1011 contigs )
GTGTATGCTCTGACGGTGTTGGGTTAGTTGTGTTTGAGACAGACACCTCT
GTCATGGAGCTGCCAA
>rnd-1_family-620#Unknown ( RepeatScout Family Size = 49, Final Multiple Alignment Size = 49, Localized to 1000 out of 1011 contigs )
GACAAATGTGAAAGGGGTATTTGACAAGGAAGAACAAGACAGTGTGCAAC
GCAGAACGGCCACCCT
>rnd-1_family-621#Unknown ( RepeatScout Family Size = 49, Final Multiple Alignment Size = 49, Localized to 1000 out of 1011 contigs )
CACTGACAAGGAACGTAGGAATAGAAAAACATCGCAGTTTCCATACTCCC
GAACCGTCGCGCAGGTAGCAGAACGTGGAAATAATCACGCAAGCGAG
>rnd-1_family-622#LINE/RTE-BovB ( RepeatScout Family Size = 48, Final Multiple Alignment Size = 48, Localized to 1000 out of 1011 contigs )
CCACGGGACCGCTACGGTAGCCATGAAGGCCACCCTGGGTCACCCCGAAA
CGTCCTGGCCAACGGGGCTCTGGTGAAGTTGCGACAGGCCTAGCAAGCCG
GCAATGGATTTATTATCGCTACAGAAAACACAATGAGATATAAACGGACT
GATCAAACGGTATCTGACCATGGCAACGTTA
>rnd-1_family-591#LINE/I ( RepeatScout Family Size = 53, Final Multiple Alignment Size = 48, Localized to 1000 out of 1011 contigs )
AGGCGTCCCNCAGGGAGGTGTCATGTCTCCCACNCTNTTCCTTNTNTNCA
TCAACGACCTGGTTCCGAAATACCACATGGAATCAAAGCGGCAATGTATG
CNGATGACCTGGCACTNTGGTGCACCGATGAACACGCGACAATAGCCACA
AGAAACTGCAGCGAGCTACAGATGCACTTGAGGCATGGGCCGACAAATGG
CGTGTCAGCATCAACACAGACAAATGCAGCACCACNCTCTTCNCTCTTTC
CCCAAAGCAAAAAGCNGGCGCCATCCACATAAACGGAACACCCCTGAGAG
AGGATAAAGAGCCCACATACCTNGGAGTAACATTTGATGANAGGCTAACA
TG
>rnd-1_family-623#Unknown ( RepeatScout Family Size = 48, Final Multiple Alignment Size = 48, Localized to 1000 out of 1011 contigs )
TTACATCACTGGCCTTGTTCTTGAGTACGATTGAAGAGAGCTACGAACTA
TATCCATTCCACTTGGCCGAATTAGGCACATCTATTTCTTGGGGGATGTA
NAGGCACGACTGTGCCACAAGTGTGAGGATATTTGGATGCCGTGACCAAC
GATCAGTCTTGTGTACTCGACATCTTTAAAAAACAAGACTGCTGTTACAA
CATAACAAATAAGCAACTGCTATAAAAAGGTGAACTAAAAGCAAGTTNAT
GATTGTACCTGCTGAGTAAAANAAAAAAGTCGANAAACCCGTCATCAGAT
TGGAGAGACGTAAACCAGACCAACAGCCTGCACCACCTTTTGGAGCCAAC
CGTCTACACTAGAATCAGGGGGACACGCCCGTTCTAGCCCGGAGCAAACC
GTCTACACTAGAATCAGGGGGACGCGCCCGTTCTAGCCTGGAGCAAACCG
TCTACACTAGAATCAGGGGGACGCGCCCGTTCTAGTCTGGAGC
>rnd-1_family-624#Unknown ( RepeatScout Family Size = 48, Final Multiple Alignment Size = 48, Localized to 1000 out of 1011 contigs )
GGCACTCTTCCGAATACCGGTCCCAAATTATTCACTGCNAAAAACATCCC
NTTCAGGGCCTCAAGAGGTT
>rnd-1_family-625#Unknown ( RepeatScout Family Size = 48, Final Multiple Alignment Size = 48, Localized to 1000 out of 1011 contigs )
TCTGTCACAGACCTCTGGGTGACCTTGNTGGTCCGTGGCTCGTAACTGGG
CCTATGACAGACAAACTAACCTTCAACACACACTGAACCCGAACGCACAC
AGAGCACACACGACAATCTTTANTGTAAGTACAGGTAATACAATAGACAG
TTGACTTCCCGCCGTGTGGCCACCTATTGCCTGGACCCTCTGGCCGAACG
AGCTTTACAATCGCCTCGCTCCCAGTACGTCCACAGGCAATCTCCTGGTG
CACAAACCACAGCCCGGCGAGATACGCTCTTTTCTATCGCCACGCTGACC
AACCAAGNTGTCACAGCCTCTGTCTAGTGCAGGGTCAGNGTGNCAAGGTT
AGACATTCTCTCACAGAACATGTACATAAATACTCTACACAAGAACTATC
CTATTCTAACACAACACTGTACATAAACTATNCAGTCACTAACAGAAATA
TCCTAACTCTAATACTATCACTGTCTCGCTAAACGTCCTCTCTCCCTGAC
CGNCGCACACCGAATGTCCCGTGTTCTCTCCACCTCGTGTCTCTTGACCC
CGTTCACCAGCTC
>rnd-1_family-626#Unknown ( RepeatScout Family Size = 47, Final Multiple Alignment Size = 47, Localized to 1000 out of 1011 contigs )
GCGTGTTCCCTGTGTACAGCCAAGATAGTTTCTTGAGGCGGGACTTCTGG
ATGCTGTCAACCCATTCTAGT
>rnd-1_family-627#Unknown ( RepeatScout Family Size = 47, Final Multiple Alignment Size = 47, Localized to 1000 out of 1011 contigs )
AGAAAACAAATACCTAGCATTCCAGCATCTCAGTATAAATAGTGGGTAAG
AAACCACTTTGAAAGCCTTCAGTCNACGAGACTTAGAAGAGGAGGGACTA
GTNACATGGACCCTCAAAGA
>rnd-1_family-628#Unknown ( RepeatScout Family Size = 47, Final Multiple Alignment Size = 47, Localized to 1000 out of 1011 contigs )
GGGGTCCNAATGGAGCAATGATGCGCAATACAAGACTCTTAATGTCTATT
AGCCTCTCTTGCTCAAGCCTACCTCACCTTCACGTGGTGGACCCTGTTCT
TCCCAGCAATCCAGTGGAAGGTTGGGGTCTCAACCCCCAGCGGGAAACTG
GATGGGACAACAAACGAGGTAAAGGCGAAGGGATGAGCCTACTCTCCCTC
TCAAGAGATCCTGAAGTCGGAAATACTGGGCCAGAAGGCGGATCAAAAAC
CACAGTA
>rnd-1_family-629#Unknown ( RepeatScout Family Size = 47, Final Multiple Alignment Size = 47, Localized to 1000 out of 1011 contigs )
TCAGGTAGGGGCATATCGGTGACACCACTGCAATCATCGATATACCTCAG
GTAGGGGCATATCGGTGA
>rnd-1_family-630#Unknown ( RepeatScout Family Size = 47, Final Multiple Alignment Size = 47, Localized to 1000 out of 1011 contigs )
ATAGCAAAGTCAGCTGGCACAAATAGAATAAACATTAGTGAAAAGGCGAT
TTTCTTCAGTGTCAGTTAGTTCTAGTGCTATTCCCCTTATTATTTAGGAA
CATAGCTACAAAATTACGGGCAAATTGAGTGTTATATAAACTTCGTTTTG
TGTGAAGATACTTATTGTTTTGGGAAGTCANTTTTCTTTACCAAATAATG
GTGCTCTGTTATGATGCTTCAAAAGATTCTCTGGAACAAAATCTAATGTA
CAGATTGAGTTTATATTTTACTTATACATTACTAAGTGGTTCATATTCAT
TTGTGATTCATTTTGGATATATTTTAACNAGTTTTCCTTGAGTGCCATGG
TGGT
>rnd-1_family-631#Unknown ( RepeatScout Family Size = 47, Final Multiple Alignment Size = 47, Localized to 1000 out of 1011 contigs )
CTCGTTCACCGACCTTTCTTGGTAAGTCATTAATTAGCATTGGTACTATT
CGAGTCACTAAGATGTCTTTTCTNTTGGGGAATCACTCGATGTCTTNNTC
CTTTGGGACACCTTAAGTCACTCAAGATATGGCTCACGTCTTTCACCGGC
TGTCCCTGACGACTCGGACACACGGCGACTTTCGGAAAACACAAGGCGAC
TTTTAGAAAACACAAGGCGACTTTTAGAAANCACAGGGCGAACTTTTANA
AAACACAAGGCGACTTTTAGAAANCACAAGGCGACTTTAGAAAACACAAG
GCGACTT
>rnd-1_family-632#LINE/RTE-BovB ( RepeatScout Family Size = 47, Final Multiple Alignment Size = 47, Localized to 1000 out of 1011 contigs )
CTGTGGAGAGCTTCGAGCAAGGCGGGGCACTTAAGACGCCTTGGTCATCC
ACTGCACCTAGGTCCATTTCCAGTCGTCTCGACATTGTCCTGCCATTGGA
TCAAGATGGACACAGGCGAGAGAGTGAGGTCGACGAATTGCGCAACTCTT
CCTCACTTAAATCCAAGTCCTTGCGCAAGTCACTTTCATCCAGCTAT
>rnd-1_family-633#Unknown ( RepeatScout Family Size = 47, Final Multiple Alignment Size = 47, Localized to 1000 out of 1011 contigs )
TTATGTTATTTGACACTTTGATTTATGTGGATGTTTTTCTCCAAGTTCTT
GTTAACAGTGCTTGGGATTTT
>rnd-1_family-578#LINE/RTE-BovB ( RepeatScout Family Size = 57, Final Multiple Alignment Size = 47, Localized to 1000 out of 1011 contigs )
CCTCTTGCTTCCTTTGTTCTTCCACAATGGTACAACTACTGCATGTTGCC
AATCGATAGGGGCCGTTTGTTGTACCCATGCCGCATTGAATATTCTGTGN
AGCCATCTGATGCTGCTTTCNCCTGCTGCTTGGATTACTTCTGTTGGTAA
TCTATCAGCTCCTGGCGCTTTATATTTGGGAGACTGTTTAATGACTTTTT
CTACTTCATCCATTAGTATGTGTGGTTCTAACACTGTTGCTCTGTGCTCT
TCAGTTGTTCTTTCCTGATGATCTCCTAGAGGATTAAAGAGCTCATTGAA
GTATTCCCTCCATCTTTCTGCNATCTCGGGTGGATCTATCAATGGCCTTC
CTGTCTTATCATTNATNATTTCNGTTGGGTTGTAGCTCTCATCTCTTTTT
CCGCATATTTTTAA
>rnd-1_family-635#Unknown ( RepeatScout Family Size = 46, Final Multiple Alignment Size = 46, Localized to 1000 out of 1011 contigs )
AGGACTTATTCAAGCTTCATCCATCAAAAAAAATTCACCCAAATTTTTCA
GGTTAGTCATGTTTGTTCCCAAGTTTAAAAAAAAAATGCTTGCATAAATT
ATGCAAATCAGAATAGTTAATTTGAATAAATGTTGAGATTTCAGTTTGAT
TCATAAATATTCTGTTAGTTCATTCAATTTCCTACACGAATATATATAGT
TTTGTATATGTTAATTAAACGCTTTATTTTTTATAATTTTTTGTGTGTAA
ACTANGAGAATCCCCTCCTGAAGGCTCCGTCTTCTTGGCACTGAAACTCC
AAAAA
>rnd-1_family-636#Unknown ( RepeatScout Family Size = 46, Final Multiple Alignment Size = 46, Localized to 1000 out of 1011 contigs )
CTCACATTTATTACTGACGTCATCTGTCGGGCATAAATTAACGGGGAGAA
AATGACTCACTACACTCTCCCCCACCCCAAAAAAAAATGTTTTACATTTT
CAATTAATCAGGTGTGANCATTTCNCTGAACATGGTGATTCTAGACCTTT
GTAGTGAATCATTTTCGACAAGTTCATTTCCAACCAAGTTCCCTTTACCT
CATTGGGTTAACAATTCAAACACTCTAAAATGCCATCTGTTGGGTCTTTN
CACGACTGTGAATACCTTAATGGGATCCTCACCCCAGGCACTCCCCTTTT
AGTGCGGAAGACCAATAATCTGGCTCCATAGGTATCCCCACCCAGTCCTA
AAGTCGGTATACAACCGAACCCCTCTCCNGGCACCCCCCGATCGGTGCGG
AAGTCCAAAATCTTGGCTCTAAAACCGAAGTGTGACCCCGTGAAGTCCCA
CCCTCGCTATTCCCATTCATGAAAGCCCCCAACAATGGCTAAATCAGCAA
TGTATGGTTTTGTTCCCAAATATGTAAGGTACAAGATGTAGTTAATTACC
TTGTCTTCAGAAACTACAACATGTCTCATTAACACACATATTCAAATTAA
ATGCTACACCAATTCAATTTAGTACACCAGTAAATGTAACATACTTTCTG
GTGAGGTGTATTTTAANCCCGAATGTTGTCTCCCTTTAATTCTGATTGTT
TACTATATTATACCCGTTCAAATCAAAA
>rnd-1_family-637#Unknown ( RepeatScout Family Size = 46, Final Multiple Alignment Size = 46, Localized to 1000 out of 1011 contigs )
AATTTACGATAATAGTAAATGTTAGNCACAAAACGCCAGTGGTGNTGCAG
CCAAAACCACTGTACACAAATCANAAGAACAATTGTCACTANNTCAGAAA
GACAATCTTCCTATCACTAGGACCAATAGAATCCTACAANGTGAAAACAG
GAAGAACCGCTTGTCAAAGACTACTGAAACAACCTCTTATTTCTTCCCAG
GAAGANTACAAGGAATGTATTCAAAGTAGTCACCAATTCTACCAGACAGC
TTATCAATATGACAACCNGCTGGTCAAGTGTCCAGCACAACCACTGAACA
CTCTAATNCACTGTTGAAAAATTACANTTACAATAAACAAAGATCCCGGA
CCTGAGACCACATTTTACGATAATGACTGTCGTATGGCAGTTTTGTCGCG
CACCTTTACTTACGGATTATTTTCCCAAATCCCTCAGGCGCTCTGAGACA
GGGGTGTTTTGAATGGTGGCTCTCGTTCGTCTAGAGGCCTAACCCTCGGT
TCAAACTTTCCATTCAACCTATCTCAGGGATGAGGCGACTCGAGCTCTGA
CTCCACAGGGTTACTATGAACTCTTGGGTACCTCTCGGCCAGACGTCCTC
A
>rnd-1_family-639#Unknown ( RepeatScout Family Size = 46, Final Multiple Alignment Size = 46, Localized to 1000 out of 1011 contigs )
CATTTAATTATAGATTAAGAACACATTCTGACCAAAACGTATCTCCATAC
TTTCTGTTTCCCTTGTTGCGGAATCTATTGTCCTCCTCTTT
>rnd-1_family-640#Unknown ( RepeatScout Family Size = 46, Final Multiple Alignment Size = 46, Localized to 1000 out of 1011 contigs )
GGGGTCCNAATGGAGCAATGATGCGCAATACAAGACTCTTAATGTCTATT
AGCCTCTCTTGCTCAAGCCTACCTCACCTTCACGTGGTGGACCCTGTTCT
TCCCAGCAATCCAGTGGAAGGTTGGGGTCTCAACCCCCAGCGGGAAACTG
GATGGGACAACAAACGAGGTAAAGGCGAAGGGATGAGCCTACTCTCCCTC
TC
>rnd-1_family-634#LINE/RTE-BovB ( RepeatScout Family Size = 47, Final Multiple Alignment Size = 46, Localized to 1000 out of 1011 contigs )
GGTGGGGGAGCTTGNGNNCCTCAATGACCCTGAGAGCTATGCCGGCGGGA
GCGTATGCTNCCGGCAGGGCCNCCCAAGCCGGACAGGTCGNAGGNNAGAG
ANCAGACTAAAGATGGCACCCCGGTCCTCCAGGCTCGGGGGTTGGGCGCA
GTGTTGACAGCTCCGCCCTGTAAAAAATCTACAACGTTACTGAAACTTCA
AGAGGAAATAAGTGCTCTAAACGTCCGGCGGTCTTGGGACAGAGTCCCTC
TGTCAGCATGAACAACATGGGTGAAAGCCGAAAGGAAGCCCATGATGGGA
AAACAAGTCTGCTGGATGTCAAAACCAAATTAAGAATTGGCTTCTGGAAT
GTAAGAACCATGTTTGAAACGGCCAAAACCGCCCAAGTAATTAAAGAAAT

>rnd-1_family-641#Unknown ( RepeatScout Family Size = 45, Final Multiple Alignment Size = 45, Localized to 1000 out of 1011 contigs )
AAAACAAACGAAGCAGTCCTCATCGAGACAGATGAAAGTCGTAAACTTAT
TAGAACAATTAGACGTAGACAGTCAAT
>rnd-1_family-642#Unknown ( RepeatScout Family Size = 45, Final Multiple Alignment Size = 45, Localized to 1000 out of 1011 contigs )
AAGAAAAAAAAAGAAAAAAGAGTTCGTTAGGCGGGGGCTAGAAACAGAAA
TATTCTNACCCAGACAGGANATCTTCTGTGTAAAGTCTAGATCAGCAGTA
ACAATAAATAAACTAGGCACACTAACTACAAGTCCTAATCCGAATCAAAA
CAACTGGAACTATGATTACCACATTGAACATCTGTTTATTTCACTTAACA
T
>rnd-1_family-638#LINE/RTE-BovB ( RepeatScout Family Size = 46, Final Multiple Alignment Size = 45, Localized to 1000 out of 1011 contigs )
ACAGTACACACAGGTCAACCCCACCTCCCAGTGGTGCACGCCGGGAAACT
GTGGCCGCGAGGCCACAGGCTAACGGGGCNCTGGCTCGCCGGANGGGACG
GGNNCCATCTGGTCAGATTTTCCCTTAAGCTGCGACAGGCCTAGCAAGCC
GGCAGTGGATTTNTTATCGCTACGAAAATCAAAANGAGATAAATAAACGG
ACNGACTCAAACGGAAAATGGACTGGCAACGTTAAAGGACGACGAGACAG
AAA
>rnd-1_family-643#Unknown ( RepeatScout Family Size = 45, Final Multiple Alignment Size = 45, Localized to 1000 out of 1011 contigs )
GGCCAAGTGTAACACAACATGATGAATGTCGANGCTTCCAAACGTAGCGG
AACGAGAACTCTCTTTAAAGGTTCCATTGGTGTATTGACAANNACGATGA
TCAACACAAGGAGAAAATATGCAATTAATAATAATCCAGACTCGTTCAAN
CACATCAACAAAAGCCCGCTCGTACATCCATGGACTGATATGTCCTCACG
ACGGGTCGCAGTCCGACCTTGAGATCCGGACGGTCATCTCGGTCTTCTCT
TCCGCAGTCCGAATTAAGTAATGAAAGTATACCGGCTTACTGCCGAACTG
TGACANTATACCAGCTTCCTGCTGAGGTCTATAGTGGAGTCCCGGGGTAA
AGCGTCCTCAAGGATCCAACTTTATACAACGTTTGCTTCCGTGGCATCCC
GGGGTAAAGCGTCCTCAAGGATCCACACGTCCGTCTCCTTCGGACTGTAA
ACATCGACTGCCTTTGACAACAATA
>rnd-1_family-644#LINE/RTE-BovB ( RepeatScout Family Size = 45, Final Multiple Alignment Size = 45, Localized to 1000 out of 1011 contigs )
ATAGTAGGGGATTGCTAGGTGTGGGCGAAGTATGGTGTGGCCTCGTGCCA
CGGGACCGCTACGGTAGCCATGAAGGCCACCCTGGGTCACCCCGAAACGT
CCTGGCCAACGGGGCTCTGGTGAAGTTGCGACAGGCCTAGCAAGCCGGCA
ATGGATTTATTATCGCTACAGAAANCACAATGAGATATAAA
>rnd-1_family-645#LINE/I-Jockey ( RepeatScout Family Size = 44, Final Multiple Alignment Size = 44, Localized to 1000 out of 1011 contigs )
AGCAGCGGCCGGGAGCCCACACCACAGANATCNTGCAGTGCTCNCGCTGC
AACAAGGCGTGGCACACCGCCGCGACCTGCCGCAGCGGCCCGNCGTGCCG
NTACTGCTCCGGGCCGCACGACTTCAAGGAGTGCCCCCTGGCNAAGNTGG
ACACNGACTTCAAGAAGCCNAACACGAACAGAAAGTGCTCCAACTGCTCA
GGCGCNCACAGCGCGAGGTACCTGGGNTGCCCGTACCTCAAGAAGTGCAG
GAG
>rnd-1_family-646#LINE/I-Jockey ( RepeatScout Family Size = 44, Final Multiple Alignment Size = 44, Localized to 1000 out of 1011 contigs )
AAGAAGAACCCGANCCAGCGCCGNGACACCAGATCNACGTCGGCCAACAA
GGAGGAAGCACCTGTCGTCGCACCAGCCCCNACGGTGCAGACGATGCCAG
AACCGACCGACGCCCCCGTCGAGACGCCAGCCTCGCCCACCCAGACGCCG
CCAGCCGCNGATGNAGCCCCTGTCGAGGCGCCATCACACCAGAAGCCGCC
CCAGTCGTGGCGCAGGGACCCACCNACACCCGCCCACNCAGGCAGCAGCA
GCGACCGGGAGCCACCAGTCCAGAGATNNTNCAGTGCTCGCGCTGCAACA
AGGCGTGGCACACCGCCGCGACCTGCCGCAGCAGCCCAGCGTGCCGNTAC
TGCTCCGGNNCGCACGACTTCAAGGAGTGCCCCCTGGCNAAGNTGGACAC
NGACTTCAAGAAGCCNAACACGAACAGAAGGTGCTCNAACTGCTCAGGNG
CCCACAGCGCGAGGTACCTGGGNTGCCCGTACCTCAAGNAGATAAA
>rnd-1_family-647#Unknown ( RepeatScout Family Size = 44, Final Multiple Alignment Size = 44, Localized to 1000 out of 1011 contigs )
TGTAATTCCCTCTGTCCATCGCTTGCATGGTCGGCCTCTTCTTCGCTTCC
CGCCTGGTCTGTACATCATTGCTTGCTGTGGTATACTGTCTGCTGACAT
>rnd-1_family-648#LINE/I-Jockey ( RepeatScout Family Size = 44, Final Multiple Alignment Size = 44, Localized to 1000 out of 1011 contigs )
CTCTCTCTGNCTGGCGGCGNACTTCTTCTTCTGCCTGGGCTGCTCTGAGG
CTGGTAAGTAGCTCTCTGANCTTTTGTNGGTTTTCTGCGTCTTCTGNCTG
TCTGTTTGTTTGCTGGGTAGCGTGTGCCAGCCTGTCTGCCTTTAGGTCTT
TGATCTCCCCTAGCANCAGGGAGATCAGNTCGAGCGTCTCCGCTCTTTCG
GCGGCGGCGGTGGCTCTTTCTTTCTGGAGTGCTGTGATTTGGCTTCTNAG
TTCGTCGATTATTTGCGGTATATCGTTTTGATGGTGGCGGAGCGTGCCTT
GTCGTTTTGTTTGTCTCTTGGTATGTTTCTCGGTGGTCTTGCCTCTGGCT
GTCTGGGCGCCTGGTATGTGTCTCTGGCGGTGGCGGCTGTCATTTCTCTC
TTGCACTTCTTGAGGTACGGGCANCCCAGGTACCTCGCGCTGTGNGCGCC
TGAGCAGTTGGAGCACTTTCTGTTCGTGTTNGGCTTCTTGAAGTCNGTGT
CCANCTTNGCCAGNGGGCACTCCTTGAAGTCGTGCGNNCCGGAGCAGTAN
CGGCA
>rnd-1_family-650#Unknown ( RepeatScout Family Size = 44, Final Multiple Alignment Size = 44, Localized to 1000 out of 1011 contigs )
GAGGGTTTGAGTTGNAGTAAAAANGAGAACTTATGGCAAAACGGCGACCT
TTGTGTCATAGTANCGAATGCCGGCCGCTCAGGGANGGTTTGAGCTGTAG
TAAAAAGGAGAA
>rnd-1_family-651#Unknown ( RepeatScout Family Size = 43, Final Multiple Alignment Size = 43, Localized to 1000 out of 1011 contigs )
AGAAGACCCGGGCAAGAGATGACAGCACGGTAAACCAGGGGCTGGAGAGA
TCAATGAGAGAAGACCCGGGCAAGAGA
>rnd-1_family-652#Unknown ( RepeatScout Family Size = 43, Final Multiple Alignment Size = 43, Localized to 1000 out of 1011 contigs )
TCGAGAGACCAGGTTTCACTTAGAATATGTGTTATCTATGGTCGAGAGAC
CAGGTTTCACTTAGAATATGTGTT
>rnd-1_family-653#LINE/RTE-BovB ( RepeatScout Family Size = 42, Final Multiple Alignment Size = 42, Localized to 1000 out of 1011 contigs )
CAGCAGGGCCTCCCAAGCCGGANAGGTCGAAGGGTAGAGAACAGACAAAG
AGAGACACCCTGGTCCTCCAGGTTGGGGGTTGAAGCGCGGGGCCGACACC
CCCGCCTTCGTAAAACTTCATCTCGTCACGAAA
>rnd-1_family-654#Unknown ( RepeatScout Family Size = 42, Final Multiple Alignment Size = 42, Localized to 1000 out of 1011 contigs )
TCTATGACACAATCTTCNTGCCAACCCTGTGCTACCAGTGCCAGACNTGG
ACAATGA
>rnd-1_family-655#Unknown ( RepeatScout Family Size = 41, Final Multiple Alignment Size = 41, Localized to 1000 out of 1011 contigs )
TTTGACTTCCGGACGCACCCTGCGGAGACCTACCCAGCTGTTGTAGCTCT
GCACATTGGGCTNGNCAGCATGGGTGCGGGCGACTGCAGGGGAAGGCCGG
TTGTCTGACTGATTTCGCAGGCGGTGGTACGTTTCANTTGGTTAGGTGGT
GTTAGATTTGATTTCCATGTGTATCCTCGCTAGGAGATAGTTTGATNGCA
GGTCGCTATAAGTGATTTGTTGGCATATTG
>rnd-1_family-656#LINE/RTE-BovB ( RepeatScout Family Size = 41, Final Multiple Alignment Size = 41, Localized to 1000 out of 1011 contigs )
AGAATGAAGAAAGAGAGACGGCCGAGACAGGCAATGCAATGGACACCACA
AGGACAGCGAGGAAGAGGCAGGCCCAGAGGCACTTGGAGGCGAACCTTTG
AGGCTGAACTCAAGGCTACGCGAAGGACAAAACTGGAGATAGAGAGGATG
GCTCAGGATCGAANTGAGTGGCGACAGTTTGTCTCTGCCTTATGTGCCTC
TGGGCGCGACGAGGATTGATTGAT
>rnd-1_family-657#Unknown ( RepeatScout Family Size = 41, Final Multiple Alignment Size = 41, Localized to 1000 out of 1011 contigs )
CGTGANTAATCGTACTTCACGCGAAGTTCGACAGTCAGCATTTCTCTTCA
CGTGAACAATTATGCTTCACGTAAAGCTTGACTNTCAGCATTTCTCTATG
NCTCCCGTGAAACTCAAGACACAANTCCCGTGTTGTCCCAGTTAGATCAA
AACATTCCNCTCACATTTATTACTGACGTCATCTGTCGGGCATAANTTAA
CGGGGAGAAAATGAGACTCACTACA
>rnd-1_family-658#Unknown ( RepeatScout Family Size = 41, Final Multiple Alignment Size = 41, Localized to 1000 out of 1011 contigs )
ATATGTAGGCCTAGTGGAAATAGGGGTCTAACTAAAACCCTATATTTAAT
ATCCCGTCTTCTACTTCATCTTTGTCTCCACCGCTGCCGTATCTTTAGTC
ATTGCCCCTAAGTGCACCCGAGGCATCCCCTGTAATACTAACACCAGTAT
TTAACAGTTTGGGAGACAGACAAATGTATTGTCTCAGACACATATAGATA
TGT
>rnd-1_family-659#LINE/Penelope ( RepeatScout Family Size = 40, Final Multiple Alignment Size = 40, Localized to 1000 out of 1011 contigs )
CTAGAAATGCTGGACTTCTTCCGGCTTCGAGGGTATCCTGAACACGTCTT
ATCTGCCGCCTTTCACCGAGCACGGTCTATCCGTCGTGCTGAGGCTCTCG
TTTCCAAGCCTAAACGTCACCACAACAGACCTATCCTCACACTTACCTAC
CACCCTCACAACATCCGCGCCAAAAATATTCTCCTCAGGCATCTCTCCAT
CCTTAGGGCTGACCCTGCCACCAGCACGATTTTCTCTGAACTTCCTCTAG
TGGCCTACAGGCATGACCGTAACCTCAAGGACATTCTAGTCAAGAGTCGG
TTACGTCCCGCGTCTGAGTCCCACTTCGGCACGGTCTCTTGCCACAGACC
TGTATGC
>rnd-1_family-660#Unknown ( RepeatScout Family Size = 40, Final Multiple Alignment Size = 40, Localized to 1000 out of 1011 contigs )
TAGAGGCGGGAGGGGATTCATCCGCGTCCAAAGCGGTAGTTAGGCCAATG
GAATTTGGCTTCACTATTAGTAAATCTCCCACCTATATGGNTGAATTTAA
ATATATNTCACTCCCAAGAGAATTAGGATAGAACTGAGTACTTANCCCGA
CATCTTGACACATAAGTACAAAAGAAGGACTATTTACCTATGGAGGAAAG
TCCAAGATTTGAAA
>rnd-1_family-661#Unknown ( RepeatScout Family Size = 39, Final Multiple Alignment Size = 39, Localized to 1000 out of 1011 contigs )
AGTTAGTGAAAAACTTGGGCTATGCAGTCGACGACGACGACGACGACGAC
GACGACGACGACGACGACGACGACGACCCGACGACGACGACGACGACGAC
GACGACGACGACGACGACGACGACGAAGCGACGACGACGACTTGAGTGAC
TTAAGGTGTCCCGTAAAGAAAAACATCGGGTGACTTGCTGTGTCCCAAGG
ACAGTGGACTACTTACTAAGAACCTTCGGTGACCGACTTGNCAAGACCAG
TGAAAGACATGCTCTGTCTCTT
>rnd-1_family-662#Unknown ( RepeatScout Family Size = 39, Final Multiple Alignment Size = 39, Localized to 1000 out of 1011 contigs )
TTAACCCTACCAGACCGCTGGCCCGNTTTTCCGGGAATTTCCTAACCTGC
CGCTANACCGCTGNCCCTAATTTTCGGTACTTTGCGTANTACGTGAAAAA
ATGCGTCACAGACTAAAAATAACCAGCCAATCGTNATCAGACCTCGTGGT
TAGTCATTGCAAATGGCTGCCCGCGTGTGTTTGGATTNACTTTGTGTGGT
TTNACGTGAAAAAATTCTGAAAATTCACAATGAAACGAGCGGCTGA
>rnd-1_family-664#Unknown ( RepeatScout Family Size = 39, Final Multiple Alignment Size = 39, Localized to 1000 out of 1011 contigs )
TTAACCCACTGACTACCAAGCCCGTTAACCCTTGCACTTTCCCAGATACC
ACGTATTTTAGTGTGTACTAAAAATGCCATAGCTTCACAACTATTTAACA
TAAACTTATAATATTTTGTATTTTTGCACCAAATTGAATGGAGAACANAT
TTCAAGAAAAAAAAGTTGTTTATTTTGTTTTACATCATCATCATGTGGCT
GTAGATTGGTGCAAAAAAGGCA
>rnd-1_family-665#Unknown ( RepeatScout Family Size = 39, Final Multiple Alignment Size = 39, Localized to 1000 out of 1011 contigs )
ATGAAATNTGACTTGAAGTATCGCTGAAATAAATGAAAATATGAGCATGA
GATAACAATCTATTTTGACTCAAGAGGAAATGCATAGAAACTGGGCAGCA
AATAGTAAGAAAAGGCGGTATATAAGACAATATGAAAAAGCCAACAGATA
ATGTGTATACATTTATCATTGCGGGATTTAAGAAGTGGTCCACACTTGTT
TGAAGTTAAACAAAAAACATGTACATACTGACTAATGTTACTGAAATAAA
TGCNCTTACCTTTTTAGATATTTCTAGATTCTAACACTGACCTGAGACGG
AATGTCGTGTAAATTTATATAATTCTTTTGAATAACAGAAGAAAGCCAAC
CAAAACTGTTGTACCAATGAGTATAAGAAAGATAACAGATAATGATTAAT
CTTTTT
>rnd-1_family-666#Unknown ( RepeatScout Family Size = 39, Final Multiple Alignment Size = 39, Localized to 1000 out of 1011 contigs )
CACACCGGACTTAGGAAGCAAAGAACCGGAATATCAGGTGTGACTGCACA
CCACAAANAAAAGGAAACCAAATAAGATAGCNAAGGAACCTTCCTCGATA
TAGCAGGC
>rnd-1_family-667#Unknown ( RepeatScout Family Size = 39, Final Multiple Alignment Size = 39, Localized to 1000 out of 1011 contigs )
CCCCCTATAATATGGGATTTCCCTAAATCTCGCGTGATGTGGTCGCTAAA
CAGAAAAGAACC
>rnd-1_family-668#Unknown ( RepeatScout Family Size = 38, Final Multiple Alignment Size = 38, Localized to 1000 out of 1011 contigs )
GCGTGCGGATGTGCACTAGAACGCACCGGTACTGAGTGAGCAAATAGGAC
GTCAAAACAATACGTAACGTTGTTAAGGNATTGTTGTCAAAGGCAGTCGA
TGTTTACAGTCCGAAGGAGACGGACGTGTGGATCC
>rnd-1_family-669#Unknown ( RepeatScout Family Size = 38, Final Multiple Alignment Size = 38, Localized to 1000 out of 1011 contigs )
[truncated: 1,018,910 more chars]
